# Supplementary material for: Bacterial genome adaptation to niches: Divergence of the potential virulence genes in three Burkholderia species of different survival strategies
Source: PubMed Central journal article supplement (PMC1343551; doi:10.1186/1471-2164-6-174), 2005-12-07
Supplement: 1471-2164-6-174-S3.pdf [file 1471-2164-6-174-S3.pdf]

**Sup\_Table\_1. Genes significantly up- or down expressed in mouse spleen and liver compared to cultures as shown in Fig. 1A.**

| Gene           | Description                                                          | Hybridization group in fig. 1A |      |      |      |      |      |      |      |      |      |       |       |
|----------------|----------------------------------------------------------------------|--------------------------------|------|------|------|------|------|------|------|------|------|-------|-------|
|                |                                                                      | 1                              | 2    | 3    | 4    | 5    | 6    | 7    | 8    | 9    | 10   | 11    | 12    |
| <b>Group 1</b> |                                                                      |                                |      |      |      |      |      |      |      |      |      |       |       |
| BMAA0450       | conserved hypothetical protein                                       | 3.35                           | 2.34 | 3.34 | 3.41 | 2.98 | 3.29 | 2.34 | 1.86 | 3.06 | 2.76 | 3.78  | 3.33  |
| BMAA0468       | glutathione-independent formaldehyde dehydrogenase                   | 3.73                           | 4.29 | 3.76 | 3.24 | 3.85 | 4.42 | 3.08 | 3.82 | 4.37 | 4.37 | 3.68  | 3.87  |
| BMAA1846       | hypothetical protein                                                 | 3.00                           | 2.44 | 3.46 | 3.32 | 3.37 | 3.60 | 4.03 | 3.17 | 3.50 | 2.68 | 4.33  | 4.22  |
| BMA0024        | aldolase, class II                                                   | 2.98                           | 2.93 | 2.42 | 2.95 | 2.44 | 3.15 | 2.76 | 2.61 | 2.82 | 2.88 | 2.29  | 2.21  |
| BMA0357        | conserved domain protein                                             | 1.37                           | 1.63 | 1.17 | 1.70 | 1.43 | 1.39 | 1.66 | 2.05 | 1.30 | 1.61 | 2.19  | 2.33  |
| BMAA0763       | hypothetical protein                                                 | 2.72                           | 2.26 | 2.45 | 2.34 | 2.29 | 2.72 | 2.88 | 2.72 | 2.08 | 1.97 | 2.36  | 2.41  |
| BMA0576        | YdjC-like family protein                                             | 0.62                           | 0.94 | 1.03 | 1.12 | 1.16 | 1.35 | 1.69 | 1.69 | 1.29 | 0.62 | 2.45  | 2.31  |
| BMAA0841       | conserved hypothetical protein, degenerate                           | 2.36                           | 2.00 | 2.64 | 2.54 | 2.41 | 2.64 | 2.27 | 1.69 | 2.89 | 2.09 | 2.45  | 2.33  |
| BMA3300        | hypothetical protein                                                 | 3.10                           | 2.37 | 3.08 | 2.69 | 2.51 | 2.74 | 2.38 | 1.95 | 2.82 | 2.65 | 2.70  | 2.22  |
| BMAA1323       | outer membrane lipoprotein, OmpA/SmpA/OmlA family                    | 2.45                           | 2.39 | 2.64 | 2.03 | 2.34 | 2.86 | 1.50 | 1.10 | 2.12 | 2.45 | 2.50  | 1.94  |
| BMAA1042       | conserved hypothetical protein                                       | 2.18                           | 2.10 | 1.90 | 2.33 | 2.25 | 2.04 | 2.27 | 2.25 | 2.27 | 1.90 | 1.98  | 2.68  |
| BMAA1354       | hypothetical protein                                                 | 2.72                           | 2.98 | 2.49 | 3.12 | 2.86 | 3.51 | 2.98 | 2.90 | 2.78 | 2.52 | 2.08  | 2.69  |
| BMAA0326       | hypothetical protein                                                 | 1.80                           | 1.49 | 1.71 | 2.60 | 1.53 | 1.96 | 2.21 | 2.76 | 2.23 | 1.75 | 2.98  | 3.35  |
| BMA3297        | oxidoreductase, FAD-binding family protein                           | 2.65                           | 3.41 | 2.96 | 3.16 | 2.69 | 3.43 | 2.39 | 2.94 | 2.79 | 3.05 | 3.17  | 2.68  |
| BMA0967        | hypothetical protein                                                 | 2.35                           | 3.44 | 2.38 | 2.63 | 2.17 | 3.23 | 2.07 | 3.25 | 2.39 | 3.13 | 3.18  | 2.48  |
| BMAA0271       | conserved domain protein                                             | 3.60                           | 3.82 | 4.11 | 4.08 | 3.39 | 4.24 | 2.95 | 2.90 | 3.78 | 3.40 | 3.04  | 2.57  |
| BMAA1128       | ABC transporter, periplasmic substrate-binding protein               | 2.85                           | 3.33 | 2.89 | 3.23 | 2.48 | 3.85 | 2.38 | 2.57 | 3.00 | 2.90 | 3.02  | 2.56  |
| BMA2777        | general secretory pathway protein K                                  | 2.23                           | 1.94 | 1.99 | 1.91 | 1.71 | 1.71 | 2.26 | 1.74 | 1.78 | 1.75 | 2.97  | 3.02  |
| BMAA1801       | TonB protein, putative                                               | 2.42                           | 3.26 | 2.46 | 3.27 | 2.41 | 3.12 | 2.64 | 2.83 | 1.96 | 1.94 | 2.96  | 2.87  |
| BMAA1619       | hypothetical protein                                                 | 2.08                           | 2.04 | 2.13 | 2.53 | 2.10 | 2.84 | 2.06 | NaN  | 1.96 | 2.03 | 2.53  | 2.51  |
| BMAA1970       | conserved hypothetical protein                                       | 1.61                           | 1.71 | NaN  | 1.71 | NaN  | 2.14 | 2.08 | 1.95 | 1.68 | 1.48 | 2.61  | 2.53  |
| BMA0328        | cation ABC transporter, periplasmic cation-binding protein, putative | 2.47                           | 2.66 | 2.43 | 2.59 | 1.95 | 2.46 | 2.41 | 2.35 | 2.19 | 2.10 | 2.85  | 2.60  |
| BMA2738        | outer membrane protein, OmpW family                                  | 3.22                           | 3.59 | 2.17 | 0.87 | 1.93 | 1.56 | 0.55 | 0.91 | 2.03 | 2.22 | 2.90  | 2.47  |
| BMA1684        | hydrolase, alpha/beta fold family                                    | 1.74                           | 2.02 | 1.78 | 2.31 | 1.39 | 2.18 | 1.97 | 1.76 | 1.89 | 1.90 | 2.63  | 2.77  |
| BMAA1524       | BapC protein                                                         | 1.76                           | 1.35 | 2.17 | 2.11 | 2.24 | 2.21 | 2.47 | 1.85 | 1.45 | 0.85 | 2.66  | 2.68  |
| BMAA0180       | isochorismatase family protein                                       | 1.29                           | 0.94 | 1.62 | 1.50 | 1.57 | 1.43 | 1.84 | 1.00 | 1.93 | 1.08 | 2.74  | 2.67  |
| BMAA2000       | 2-hydroxy-3-oxopropionate reductase                                  | 2.41                           | 2.24 | 2.27 | 1.67 | 2.39 | 2.47 | 2.17 | 1.54 | 2.03 | 1.73 | 2.73  | 2.72  |
| BMAA2045       | major facilitator family transporter                                 | 2.29                           | 2.64 | 2.53 | 2.93 | 2.08 | 2.74 | 2.62 | 2.67 | 2.81 | 2.36 | 2.79  | 2.80  |
| BMA1944-LX     | conserved hypothetical protein                                       | 2.00                           | 0.89 | 2.15 | 1.82 | 1.97 | 0.86 | 0.76 | 0.60 | 1.64 | 1.16 | -0.74 | 0.22  |
| BMA0016-LX     | hypothetical protein                                                 | 1.11                           | 0.99 | NaN  | 1.12 | 1.33 | 1.32 | 0.79 | 1.02 | 1.08 | 0.33 | -0.52 | 0.11  |
| BMA2880-LX     | 3-oxoacyl-(acyl-carrier-protein) synthase III, putative              | 1.20                           | 1.51 | NaN  | 1.78 | 1.39 | 1.20 | 0.52 | 0.67 | 1.30 | 1.20 | -0.59 | 0.05  |
| BMA1754-LX     | CoA transferase, CAIB/BAIF family                                    | 1.11                           | 1.39 | 1.31 | 1.46 | 2.53 | 1.78 | 0.71 | 1.00 | 1.69 | 1.34 | -0.01 | 0.00  |
| BMAA0595-LX    | fusaric acid resistance domain protein                               | 3.42                           | 3.53 | 3.21 | 2.40 | 3.02 | 3.27 | 2.02 | 1.38 | 2.12 | 2.63 | 0.02  | -0.21 |
| BMAA0059-LX    | conserved hypothetical protein                                       | 2.88                           | 2.45 | 2.39 | 2.15 | 2.84 | 2.60 | 1.41 | 0.59 | 2.13 | 1.80 | -0.19 | -0.15 |
| BMAA0394-LX    | lipoprotein, putative                                                | 1.85                           | 1.60 | 1.48 | 2.24 | 2.02 | 2.20 | 1.31 | 0.69 | 1.83 | 1.55 | -0.19 | -0.16 |
| BMA0985-LX     | hypothetical protein                                                 | 2.35                           | 1.78 | 2.55 | 2.10 | 2.43 | 2.27 | 1.92 | 1.39 | 2.10 | 2.00 | -0.12 | -0.12 |
| BMAA0651-LX    | H-NS histone family protein                                          | 1.84                           | 0.66 | 1.80 | 1.69 | 2.00 | 1.91 | 0.70 | 0.66 | 2.33 | 1.51 | -0.17 | -0.09 |
| BMAA0073-LX    | hypothetical protein                                                 | 1.72                           | 1.24 | 1.32 | 0.67 | 2.12 | 1.36 | 0.49 | 0.40 | 1.46 | 0.84 | -0.41 | -0.21 |
| BMAA0098-LX    | hypothetical protein                                                 | 1.28                           | 1.65 | NaN  | NaN  | NaN  | 1.99 | 1.08 | 1.15 | NaN  | 1.54 | -0.33 | -0.16 |
| BMAA1383-LX    | hypothetical protein                                                 | NaN                            | 1.37 | NaN  | 1.23 | NaN  | 1.39 | 1.07 | 0.77 | 1.58 | NaN  | -0.27 | 0.07  |
| BMA2847-LX     | flagellar biosynthetic protein FlhB                                  | 1.16                           | 1.00 | 1.94 | 0.81 | 1.44 | 1.25 | 0.38 | 0.18 | 1.06 | 1.01 | -0.16 | -0.40 |
| BMAA0838-LX    | hypothetical protein                                                 | 1.76                           | 1.52 | NaN  | NaN  | NaN  | 2.10 | 0.51 | 0.51 | 1.41 | 1.78 | -0.30 | -0.64 |
| BMAA1164-LX    | membrane protein, putative                                           | 1.94                           | 1.85 | 2.48 | 1.56 | 1.93 | 2.56 | 1.40 | 1.42 | 1.76 | 1.52 | -0.02 | -0.64 |
| BMAA0589-LX    | conserved hypothetical protein                                       | 2.00                           | 1.01 | 2.15 | 0.81 | 1.82 | 1.17 | 0.22 | 0.30 | 0.27 | 0.75 | -0.58 | -0.57 |

|             |                                                                 |       |      |      |       |       |      |      |      |      |      |       |       |
|-------------|-----------------------------------------------------------------|-------|------|------|-------|-------|------|------|------|------|------|-------|-------|
| BMAA1568-LX | serine protease, kumamolysin                                    | 2.20  | 1.47 | 2.08 | 1.98  | 1.25  | 1.16 | 1.09 | 1.19 | 2.10 | 2.00 | -0.54 | -0.46 |
| BMAA0618-LX | hypothetical protein                                            | 1.70  | 0.59 | 1.15 | 0.67  | 1.59  | 0.91 | 0.40 | 0.22 | 0.96 | 0.86 | -1.80 | -1.77 |
| BMAA0454-LX | conserved hypothetical protein                                  | 2.35  | 2.22 | 2.21 | 1.86  | 2.60  | 2.58 | 1.88 | 1.79 | 2.46 | 2.15 | -1.15 | -1.27 |
| BMAA0594-LX | hypothetical protein                                            | 2.06  | 1.47 | 2.15 | 1.68  | 2.28  | 2.02 | 0.95 | 1.04 | 1.71 | 1.98 | -0.91 | -1.16 |
| BMAA0922-LX | drug resistance transporter, EmrB/QacA family                   | 2.96  | 2.46 | 2.59 | 2.78  | 2.20  | 3.05 | 1.03 | 1.01 | 1.42 | 2.18 | -1.27 | -1.57 |
| BMA1634-LX  | conserved hypothetical protein                                  | 1.96  | 1.30 | 2.31 | 2.21  | 2.28  | 1.70 | 1.45 | 0.69 | 1.96 | 1.64 | -1.36 | -1.36 |
| BMAA0985-LX | hypothetical protein                                            | 3.42  | 2.84 | 2.42 | 2.05  | 2.66  | 2.54 | 0.61 | 2.35 | 2.20 | 3.00 | -1.52 | -1.30 |
| BMAA0280-LX | membrane protein, putative                                      | 3.05  | 2.50 | 2.56 | 2.32  | 3.08  | 2.51 | 0.83 | 0.47 | 1.87 | 2.10 | -0.93 | -0.68 |
| BMAA1842-LX | hypothetical protein                                            | 2.15  | 1.88 | 2.39 | 2.73  | 2.06  | 2.34 | 2.26 | 2.21 | 2.34 | 1.67 | -1.00 | -0.87 |
| BMA2679     | ABC transporter, ATP-binding protein                            | 1.48  | 0.75 | NaN  | 0.81  | 2.04  | 2.80 | 1.21 | 1.07 | NaN  | 2.07 | 1.66  | 0.49  |
| BMAA0646    | hypothetical protein                                            | 1.35  | 1.72 | 0.59 | 1.48  | 1.16  | 2.24 | 0.32 | 1.23 | 0.91 | 1.90 | 1.80  | 0.59  |
| BMAA1252    | hypothetical protein                                            | 1.44  | 3.02 | 0.54 | 1.43  | 1.46  | 2.86 | 0.67 | 2.95 | 1.03 | 2.48 | 1.43  | 0.49  |
| BMA3328     | flagellar hook protein FlgE                                     | 1.28  | 2.54 | 1.23 | 1.09  | 1.23  | 2.59 | 1.16 | 2.16 | 1.30 | 2.29 | 1.20  | 0.46  |
| BMAA1517    | transcriptional regulator, araC family                          | 0.43  | 0.78 | 0.58 | NaN   | NaN   | 0.99 | 1.39 | 0.95 | 0.19 | 0.07 | 1.11  | 0.39  |
| BMA0988     | cytochrome c family protein                                     | 1.01  | 1.57 | 0.77 | 1.64  | 0.78  | 1.44 | 1.66 | 2.11 | 1.28 | 1.67 | 1.12  | 0.66  |
| BMAA1419    | proline racemase, putative                                      | 0.87  | 1.48 | NaN  | 1.42  | 0.83  | 1.82 | 1.32 | 1.56 | 1.28 | 1.41 | 1.04  | 0.61  |
| BMAA0689    | hypothetical protein                                            | 1.85  | 2.14 | 2.57 | 2.60  | 2.04  | 2.93 | 2.35 | 1.68 | 2.39 | 1.77 | 1.07  | 0.72  |
| BMAA0410    | Rhs element Vgr protein                                         | 2.66  | 2.21 | 3.17 | 2.44  | 2.63  | 2.63 | 2.19 | 1.11 | 2.76 | 2.19 | 1.04  | 0.80  |
| BMAA1540    | type III secretion system protein BsaS                          | 0.30  | 1.07 | 0.38 | 0.85  | 0.62  | 1.34 | 0.75 | 1.94 | 0.36 | 0.95 | 1.08  | 0.77  |
| BMAA1625    | type III secretion inner membrane protein, authentic frameshift | 0.38  | 1.01 | NaN  | 2.08  | -0.01 | 2.10 | 1.32 | 1.64 | NaN  | 0.71 | 1.26  | 0.75  |
| BMA0305     | conserved hypothetical protein, authentic point mutation        | 1.77  | 1.74 | 1.72 | 1.73  | 2.08  | 2.28 | 1.91 | 1.11 | 1.89 | 1.63 | 1.24  | 0.83  |
| BMAA1202    | polyketide synthase, putative, degenerate                       | NaN   | 0.88 | NaN  | -0.03 | 0.26  | 1.28 | 1.29 | 1.39 | NaN  | 0.75 | 1.26  | 0.85  |
| BMAA1887    | hypothetical protein                                            | 2.47  | 2.60 | 2.39 | 2.62  | 2.38  | 3.05 | 1.82 | 1.96 | 2.30 | 2.39 | 1.17  | 0.85  |
| BMAA1390    | conserved hypothetical protein                                  | 0.40  | 1.63 | NaN  | NaN   | 1.01  | 2.25 | 0.88 | 1.60 | 1.09 | 1.49 | 0.85  | -0.50 |
| BMA0017     | hypothetical protein                                            | 1.98  | 1.88 | 2.77 | 2.18  | 2.75  | 2.95 | 1.65 | 1.30 | 1.99 | 1.54 | 0.67  | 0.22  |
| BMA0224     | hypothetical protein                                            | 2.92  | 3.12 | 2.57 | 3.36  | 2.81  | 3.34 | 2.01 | 2.71 | 2.84 | 2.71 | 0.76  | 0.17  |
| BMAA0323    | hypothetical protein                                            | 1.01  | 1.58 | NaN  | NaN   | NaN   | 1.64 | 0.90 | 1.13 | NaN  | 1.35 | 0.89  | 0.23  |
| BMA1854     | Ser/Thr protein phosphatase family protein                      | 2.62  | 2.40 | 2.94 | 2.82  | 2.70  | 2.98 | 2.50 | 2.27 | 2.83 | 2.28 | 0.92  | 0.71  |
| BMA0040     | conserved hypothetical protein                                  | 2.75  | 2.44 | 2.26 | 2.79  | 2.46  | 2.83 | 0.55 | 0.82 | 2.68 | 2.17 | 0.83  | 0.71  |
| BMA1900     | carboxymuconolactone decarboxylase family protein               | -0.27 | NaN  | NaN  | NaN   | 0.03  | NaN  | 1.10 | 1.71 | NaN  | 0.16 | 0.81  | NaN   |
| BMA2908     | conserved hypothetical protein                                  | 2.07  | 2.06 | 2.68 | 2.98  | 1.67  | 2.30 | 2.02 | 1.56 | 2.22 | 0.98 | 0.81  | 0.69  |
| BMA3068     | hypothetical protein                                            | 2.61  | 2.39 | 2.52 | 2.73  | 2.96  | 2.84 | 1.33 | 1.12 | 2.42 | 1.93 | 0.74  | 0.78  |
| BMA0887     | di-haem cytochrome c peroxidase family protein                  | 2.65  | 2.10 | 3.02 | 3.24  | 3.00  | 2.79 | 2.97 | 2.29 | 3.11 | 1.72 | 0.67  | 0.87  |
| BMA3224     | conserved hypothetical protein                                  | 0.79  | 0.94 | NaN  | 1.02  | 0.63  | 1.29 | 1.02 | 0.28 | 0.51 | 0.45 | 0.66  | 0.70  |
| BMAA1151    | conserved hypothetical protein                                  | 2.11  | 1.44 | 1.71 | 1.95  | 1.99  | 2.10 | 2.43 | 1.58 | 2.19 | 1.25 | 0.62  | 0.76  |
| BMA3246     | homoserine O-acetyltransferase                                  | 3.10  | 2.79 | 2.51 | 2.75  | 2.46  | 2.44 | 1.00 | 0.99 | 2.22 | 2.01 | 0.52  | 0.52  |
| BMAA0848    | 4-hydroxyphenylpyruvate dioxygenase, putative                   | 1.54  | 0.23 | NaN  | 2.03  | 1.56  | 2.07 | 1.95 | 1.49 | NaN  | 1.36 | 0.59  | 0.45  |
| BMA2589     | flavodoxin domain protein                                       | 1.48  | 1.42 | NaN  | 1.20  | 1.38  | 1.12 | 1.21 | 0.63 | 1.46 | 1.08 | 0.79  | 0.43  |
| BMA3012     | hypothetical protein                                            | 2.85  | 2.56 | 2.16 | 2.61  | 2.53  | 3.04 | 1.38 | 1.21 | 2.89 | 2.90 | 0.71  | 0.37  |
| BMAA0628    | hypothetical protein                                            | 2.13  | 1.79 | 3.08 | 1.69  | 2.47  | 2.29 | 2.15 | 1.63 | 2.99 | 2.25 | 0.73  | 0.39  |
| BMAA2018    | conserved hypothetical protein                                  | 2.00  | 1.85 | 2.12 | 2.15  | 2.37  | 2.58 | 2.12 | 1.41 | 2.27 | 1.59 | 0.73  | 0.57  |
| BMA1621     | cysteine synthase/cystathionine beta-synthase family protein    | 1.17  | 1.79 | 1.76 | 1.72  | 1.36  | 2.35 | 1.59 | 1.08 | 1.68 | 1.28 | 0.33  | -0.06 |
| BMA1058     | drug resistance transporter, EmrB/QacA family                   | 1.87  | 1.21 | 2.05 | 1.97  | 1.60  | 1.28 | 1.30 | 0.95 | 2.03 | 1.70 | 0.28  | 0.20  |
| BMA1473     | outer membrane porin, putative                                  | 0.63  | 1.09 | NaN  | 1.20  | 1.02  | 1.32 | 1.44 | 0.83 | 1.31 | 1.04 | 0.22  | 0.18  |
| BMA2247     | hypothetical protein                                            | 1.33  | 1.81 | NaN  | 1.11  | 2.09  | 1.64 | 0.69 | 0.77 | 0.73 | 1.21 | 0.25  | 0.11  |
| BMAA0259    | extracellular nuclease, putative                                | 0.83  | 1.35 | NaN  | NaN   | NaN   | 1.33 | 1.17 | 1.06 | NaN  | 1.22 | 0.16  | 0.08  |
| BMA0824     | poly(3-hydroxybutyrate) depolymerase                            | 1.30  | 1.26 | 0.95 | 1.15  | 1.75  | 1.66 | 0.88 | 0.61 | 1.38 | 1.26 | 0.19  | 0.26  |
| BMA0702     | hypothetical protein                                            | 3.32  | 3.32 | 2.68 | 3.18  | 2.96  | 3.05 | 1.86 | 2.69 | 2.79 | 2.80 | 0.14  | 0.34  |
| BMAA1184    | conserved hypothetical protein                                  | -0.03 | 0.13 | NaN  | 0.77  | NaN   | 0.62 | 1.22 | 1.38 | NaN  | NaN  | 0.18  | 0.35  |

|          |                                                                                           |      |      |       |      |      |      |       |      |      |      |       |      |
|----------|-------------------------------------------------------------------------------------------|------|------|-------|------|------|------|-------|------|------|------|-------|------|
| BMAA1486 | O-methyltransferase family protein                                                        | 0.20 | 0.16 | 0.22  | 2.19 | 1.87 | 1.66 | 1.42  | 0.59 | 1.74 | 1.90 | 0.48  | 0.23 |
| BMAA1520 | type III secretion chaperone BicP                                                         | 0.78 | 0.55 | 0.51  | 1.24 | 1.25 | 1.23 | 1.25  | 1.04 | 0.31 | 0.22 | 0.38  | 0.42 |
| BMAA2047 | molybdopterin oxidoreductase family protein                                               | 2.28 | 1.70 | 1.91  | 2.50 | 2.30 | 2.03 | 1.79  | 1.63 | 2.49 | 2.17 | 0.39  | 0.31 |
| BMAA0014 | hypothetical protein                                                                      | 2.89 | 3.05 | 2.46  | 2.12 | 2.97 | 2.06 | 1.40  | 3.19 | 1.37 | 0.87 | 0.29  | 1.68 |
| BMAA0267 | conserved domain protein, truncation                                                      | 4.45 | 4.37 | 2.67  | 3.06 | 3.35 | 3.50 | 1.61  | 1.87 | 2.59 | 2.76 | 0.49  | 1.64 |
| BMAA1044 | conserved hypothetical protein                                                            | 3.11 | 2.84 | 1.59  | 2.64 | 3.05 | 2.25 | 1.12  | 2.20 | 2.94 | 2.81 | 0.04  | 1.60 |
| BMAA0474 | oxidoreductase, FAD/FMN-binding                                                           | 3.31 | 3.53 | 1.00  | 1.89 | 3.22 | 2.43 | 0.23  | 2.36 | 2.93 | 3.17 | 0.11  | 1.92 |
| BMAA1175 | cob(I)alamin adenosyltransferase                                                          | 2.95 | 3.53 | 1.39  | 2.45 | 2.14 | 1.59 | 1.11  | 2.49 | 2.08 | 2.40 | 0.68  | 2.10 |
| BMAA1104 | oxidoreductase, short chain dehydrogenase/reductase family                                | 1.79 | 1.97 | 0.77  | 2.27 | 1.73 | 1.49 | 0.86  | 2.23 | 1.88 | 2.00 | 0.68  | 1.87 |
| BMAA1162 | hypothetical protein                                                                      | 2.02 | 2.32 | 1.13  | 2.22 | 2.27 | 1.84 | 1.37  | 2.25 | 1.92 | 1.59 | 0.69  | 1.88 |
| BMAA0451 | lipoprotein, putative                                                                     | 1.83 | 2.01 | 2.10  | 2.42 | 2.13 | 1.96 | 1.54  | 1.65 | 1.74 | 1.71 | 0.25  | 0.97 |
| BMAA0775 | hypothetical protein                                                                      | 0.86 | 1.44 | NaN   | 1.67 | 1.04 | 1.38 | 0.76  | 1.82 | NaN  | 1.62 | 0.16  | 1.06 |
| BMAA0566 | transcriptional regulator, AraC family                                                    | 1.83 | 1.20 | NaN   | NaN  | NaN  | 1.20 | 0.16  | 0.02 | 0.94 | 1.31 | 0.64  | 1.01 |
| BMAA1198 | ribose ABC transporter, periplasmic ribose-binding protein                                | 0.96 | 1.63 | -0.26 | 1.30 | 0.36 | 1.07 | 0.40  | 2.10 | NaN  | 1.19 | 0.70  | 1.13 |
| BMAA1637 | membrane protein, putative                                                                | 1.67 | 1.69 | 1.78  | 2.19 | 1.98 | 1.61 | 1.73  | 1.88 | 2.14 | 1.56 | 0.60  | 1.15 |
| BMAA1434 | hypothetical protein                                                                      | 1.91 | 1.43 | 1.48  | 1.77 | 2.26 | 1.76 | 1.77  | 1.29 | 1.69 | 1.46 | 0.61  | 1.11 |
| BMAA0386 | D-serine dehydratase, authentic frameshift                                                | 1.65 | 1.65 | 1.47  | 2.14 | 1.58 | 1.75 | 1.42  | 1.62 | 2.13 | 1.32 | 0.47  | 0.92 |
| BMAA1912 | conserved hypothetical protein                                                            | 0.61 | 0.79 | 1.77  | 1.28 | 1.52 | 1.10 | 0.91  | 0.37 | 0.81 | 0.49 | 0.49  | 1.02 |
| BMAA1044 | efflux transporter, RND family, MFP subunit                                               | 1.32 | 1.07 | NaN   | NaN  | 1.01 | 0.87 | 0.75  | 1.45 | NaN  | 0.93 | 0.46  | 1.25 |
| BMAA1935 | hypothetical protein                                                                      | 1.58 | 1.64 | NaN   | 1.47 | 2.00 | 1.09 | NaN   | 1.55 | 1.91 | 1.16 | 0.49  | 1.20 |
| BMAA1660 | sensory box sensor histidine kinase                                                       | 1.13 | 2.14 | 1.05  | 2.05 | 1.16 | 0.78 | -0.25 | 1.40 | 1.53 | 2.23 | -0.47 | 0.92 |
| BMAA1116 | conserved hypothetical protein                                                            | 2.01 | 1.77 | 2.16  | 2.09 | 1.99 | 1.69 | 1.76  | 1.62 | 2.20 | 1.55 | 0.27  | 0.69 |
| BMAA0560 | arsenical resistance transcriptional regulator                                            | 1.93 | 1.53 | 2.42  | 2.07 | 2.03 | 1.79 | 2.27  | 1.65 | 2.26 | 1.70 | 0.09  | 0.48 |
| BMAA0955 | hypothetical protein                                                                      | 1.64 | 1.69 | 1.50  | 2.07 | 2.21 | 2.30 | 1.61  | 1.55 | 1.96 | 1.55 | 0.09  | 0.47 |
| BMAA1732 | nitrate reductase, beta subunit                                                           | 0.51 | 0.53 | 0.59  | 1.96 | 2.27 | 1.91 | 1.08  | 1.19 | 2.19 | 1.64 | 0.05  | 0.57 |
| BMAA1475 | porin, degenerate                                                                         | 2.31 | 2.00 | 1.93  | 2.08 | 1.74 | 1.73 | 0.91  | 0.98 | 2.20 | 1.73 | 0.02  | 0.61 |
| BMAA0642 | conserved hypothetical protein, degenerate                                                | 1.37 | 1.42 | NaN   | 2.24 | 2.51 | 1.35 | 1.10  | 2.18 | 2.18 | 1.60 | -0.45 | 0.51 |
| BMAA1498 | O-antigen acetylase, putative                                                             | 2.91 | 2.35 | 2.39  | 2.77 | 2.50 | 2.15 | 1.78  | 2.25 | 2.53 | 2.11 | -0.25 | 0.69 |
| BMAA1757 | hemolysin activator protein, HlyB family                                                  | 1.59 | 1.26 | 0.49  | 1.35 | 1.80 | 1.07 | -0.17 | 0.76 | 1.05 | 1.43 | -0.32 | 0.60 |
| BMAA0673 | hypothetical protein                                                                      | 1.01 | 0.76 | 1.14  | 1.34 | 2.04 | 1.34 | 1.24  | 0.40 | 2.32 | 1.30 | -0.28 | 0.39 |
| BMAA1239 | alkanesulfonate monooxygenase                                                             | 2.14 | 1.78 | NaN   | 2.22 | 1.96 | 1.76 | 1.29  | 1.12 | 1.65 | 1.63 | -0.11 | 0.47 |
| BMAA0752 | hypothetical protein                                                                      | 2.29 | 1.44 | 1.82  | 2.22 | 2.38 | 2.30 | 2.08  | 1.26 | 1.71 | 1.06 | -0.17 | 0.38 |
| BMAA1945 | hypothetical protein                                                                      | 3.38 | 3.17 | 2.81  | 2.59 | 2.95 | 2.79 | 1.27  | 1.25 | 2.33 | 2.59 | -0.07 | 0.35 |
| BMAA1995 | conserved domain protein                                                                  | 2.33 | 2.28 | 2.10  | 3.23 | 2.26 | 2.62 | 2.11  | 2.04 | 2.33 | 2.40 | -0.01 | 0.34 |
| BMAA1038 | penicillin amidase, putative                                                              | 1.35 | 1.50 | 1.43  | 1.39 | 1.71 | 1.67 | 1.16  | 1.08 | 1.63 | 1.80 | 1.46  | 2.15 |
| BMAA0957 | conserved hypothetical protein                                                            | 1.30 | 1.52 | 0.90  | 2.05 | 1.33 | 1.79 | 1.50  | 1.76 | 1.18 | 1.63 | 1.64  | 2.28 |
| BMAA0154 | sulfotransferase domain protein                                                           | 2.71 | 2.88 | 1.83  | 3.30 | 3.14 | 2.53 | 2.12  | 2.44 | 2.85 | 2.24 | 1.19  | 2.10 |
| BMAA1109 | hypothetical protein                                                                      | 2.24 | 2.02 | 2.05  | 2.59 | 2.19 | 2.23 | 2.45  | 2.42 | 2.23 | 1.87 | 1.35  | 1.96 |
| BMAA0101 | 8-amino-7-oxononanoate synthase                                                           | 2.50 | 3.16 | 1.69  | 2.96 | 2.50 | 1.97 | 1.35  | 3.14 | 2.37 | 2.80 | 1.17  | 2.42 |
| BMAA2006 | flavin reductase domain protein                                                           | 2.11 | 2.49 | 0.60  | 2.35 | 2.12 | 1.79 | 1.12  | 2.17 | 2.20 | 2.25 | 1.28  | 2.47 |
| BMAA0493 | conserved hypothetical protein                                                            | 2.79 | 2.94 | 2.53  | 2.93 | 2.38 | 3.10 | 1.52  | 1.74 | 2.57 | 2.60 | 2.12  | 1.22 |
| BMAA0503 | hemK protein                                                                              | 0.85 | 1.22 | 1.85  | 1.66 | 1.18 | 2.13 | 1.81  | 1.99 | 1.87 | 1.84 | 2.15  | 1.30 |
| BMAA2282 | amino acid permease, truncation                                                           | 2.54 | 2.71 | 2.46  | 1.56 | 2.03 | 2.58 | 0.76  | 0.92 | 2.03 | 0.95 | 1.87  | 1.41 |
| BMAA0731 | hypothetical protein                                                                      | 1.27 | 1.81 | 1.34  | 1.52 | 0.81 | 1.86 | 1.77  | 2.42 | 0.50 | 0.90 | 1.87  | 1.38 |
| BMAA1639 | methyltransferase, putative/adenylsulfate kinase                                          | 2.08 | 2.98 | 2.20  | 1.48 | 2.14 | 2.88 | 1.75  | 2.75 | 1.69 | 2.37 | 1.77  | 1.39 |
| BMAA1683 | formate dehydrogenase, alpha subunit, selenocysteine-containing, authentic point mutation | 2.38 | 2.25 | 1.60  | 0.89 | 1.79 | 1.90 | 1.61  | 1.51 | 2.40 | 2.44 | 1.71  | 1.37 |
| BMAA0664 | EAL/GGDEF domain protein                                                                  | 2.29 | 1.42 | 3.14  | 2.59 | 2.26 | 3.01 | 2.64  | 2.42 | 2.84 | 2.57 | 1.88  | 1.66 |
| BMAA0321 | conserved hypothetical protein                                                            | 3.13 | 3.13 | 3.09  | 3.13 | 3.01 | 3.81 | 2.42  | 2.33 | 3.16 | 2.99 | 1.76  | 1.68 |
| BMAA0372 | hypothetical protein                                                                      | 1.08 | 0.92 | NaN   | 0.88 | 2.24 | 1.78 | 1.95  | 1.83 | 1.20 | 1.28 | 1.69  | 1.73 |

|          |                                                          |      |      |       |      |      |      |      |       |      |      |      |      |
|----------|----------------------------------------------------------|------|------|-------|------|------|------|------|-------|------|------|------|------|
| BMAA0895 | hypothetical protein                                     | 2.56 | 2.60 | 2.23  | 2.64 | 2.06 | 2.48 | 1.74 | 1.85  | 1.87 | 2.53 | 1.69 | 1.69 |
| BMAA1624 | conserved hypothetical protein                           | 1.47 | 1.39 | NaN   | 1.90 | NaN  | 1.69 | 1.65 | 1.72  | 1.74 | 0.97 | 1.60 | 1.57 |
| BMA0320  | xanthine/uracil permease family protein, truncation      | 3.10 | 3.27 | 2.73  | 3.33 | 2.48 | 3.72 | 2.40 | 2.22  | 2.72 | 2.72 | 1.65 | 1.48 |
| BMA2860  | chemotaxis response regulator                            | 1.50 | 2.30 | 1.31  | 1.50 | 1.40 | 2.56 | 1.36 | 1.99  | 1.09 | 1.98 | 1.67 | 1.48 |
| BMA0030  | ElaA family protein                                      | 1.34 | 1.33 | 1.10  | 1.70 | 1.52 | 1.83 | 1.92 | 1.56  | 1.50 | 1.26 | 1.74 | 1.54 |
| BMAA1841 | glyoxalase family protein                                | 1.50 | 1.03 | 1.54  | 1.56 | 1.10 | 1.37 | 2.08 | 1.46  | 1.28 | 1.10 | 1.74 | 1.52 |
| BMA1561  | hypothetical protein                                     | 0.79 | 1.09 | NaN   | 1.41 | NaN  | 1.75 | 1.42 | 1.50  | 1.11 | 1.18 | 1.77 | 2.15 |
| BMA0678  | isoleucine biosynthesis transcriptional activator        | 2.78 | 2.79 | 2.69  | 2.64 | 2.54 | 2.62 | 2.46 | 1.88  | 2.31 | 2.35 | 1.86 | 2.16 |
| BMA3132  | molybdopterin oxidoreductase family protein              | 1.42 | 1.54 | 1.78  | 1.90 | 1.68 | 1.76 | 2.00 | 1.85  | 1.90 | 1.72 | 1.84 | 2.20 |
| BMA2131  | 6-phosphogluconolactonase                                | 2.32 | 2.01 | 1.94  | 2.24 | 2.27 | 2.67 | 1.87 | 1.87  | 1.58 | 1.27 | 2.03 | 2.28 |
| BMAA0363 | sigma-54 dependent DNA-binding transcriptional regulator | 2.47 | 2.31 | 2.16  | 2.28 | 2.26 | 2.15 | 2.82 | 2.63  | 2.51 | 2.24 | 1.96 | 2.22 |
| BMA1194  | carbohydrate kinase, FGGY family                         | 1.41 | 1.94 | 1.57  | 1.43 | 1.56 | 2.19 | 1.87 | 1.93  | 1.23 | 1.55 | 2.14 | 1.88 |
| BMA2576  | phenylacetic acid degradation protein PaaD               | 2.03 | 2.80 | 1.88  | 2.98 | 1.97 | 3.01 | 1.80 | 2.00  | 1.68 | 2.65 | 2.10 | 1.99 |
| BMAA0242 | acyl-CoA dehydrogenase domain protein                    | 2.02 | 1.89 | 1.88  | 1.95 | 2.24 | 2.17 | 2.16 | 1.64  | 2.20 | 1.95 | 2.14 | 1.95 |
| BMA1638  | peptide synthetase-domain protein                        | 1.84 | 1.88 | 2.03  | 2.43 | 1.76 | 2.93 | 2.36 | 2.32  | 1.56 | 2.03 | 2.08 | 2.09 |
| BMAA1062 | conserved hypothetical protein                           | 2.13 | 2.11 | 2.36  | 2.56 | 2.35 | 2.51 | 2.94 | 2.28  | 2.24 | 1.92 | 2.05 | 2.04 |
| BMA0912  | iolD protein                                             | 1.35 | 1.58 | 0.92  | 1.26 | 1.09 | 1.83 | 1.52 | 1.77  | 1.24 | 1.29 | 2.08 | 2.03 |
| BMAA0641 | hydrolase                                                | 1.70 | 1.65 | 1.76  | 2.11 | 1.55 | 2.46 | 2.29 | 1.96  | 2.02 | 1.78 | 2.09 | 2.02 |
| BMAA1428 | lactate permease family protein                          | 2.28 | 2.32 | 2.43  | 2.45 | 2.21 | 2.59 | 1.90 | 2.24  | 2.61 | 2.74 | 2.10 | 2.03 |
| BMA2157  | conserved hypothetical protein                           | 1.49 | 2.14 | 1.76  | 2.21 | 1.86 | 1.57 | 1.78 | 1.77  | NaN  | 1.73 | 1.86 | 1.92 |
| BMAA0825 | hypothetical protein                                     | NaN  | 1.29 | NaN   | NaN  | NaN  | 1.61 | 1.50 | 1.78  | NaN  | 0.98 | 1.84 | 1.87 |
| BMAA1397 | conserved hypothetical protein                           | 1.65 | 2.05 | 1.59  | 2.18 | 2.05 | 2.50 | 2.16 | 2.02  | 2.04 | 1.60 | 1.84 | 1.86 |
| BMA2222  | phenazine biosynthesis protein phzF, putative            | 1.20 | 1.64 | 1.24  | 1.90 | 1.50 | 2.23 | 1.90 | 1.64  | 1.25 | 1.41 | 1.63 | 1.93 |
| BMAA0562 | hypothetical protein                                     | 1.90 | 1.99 | 2.38  | 2.35 | 2.40 | 2.58 | 2.05 | -0.34 | 1.74 | 1.73 | 1.62 | 1.98 |
| BMA1505  | allantoicase                                             | 2.45 | 2.63 | 2.15  | 2.04 | 2.33 | 2.68 | 1.21 | 1.51  | 2.32 | 2.49 | 1.80 | 1.98 |
| BMAA1248 | serine metalloprotease MrpA                              | 1.61 | 1.59 | 1.33  | 1.79 | 1.56 | 1.98 | 1.67 | 1.35  | 1.85 | 1.27 | 1.77 | 2.03 |
| BMAA1865 | conserved hypothetical protein                           | 2.20 | 2.00 | 2.52  | 2.30 | 2.43 | 2.18 | 1.66 | 1.45  | 2.40 | 1.57 | 1.73 | 1.95 |
| BMAA0188 | transcriptional regulator CatR                           | 1.74 | 2.31 | 1.16  | 1.73 | 1.82 | 2.65 | 1.85 | 1.52  | 1.88 | 1.86 | 2.24 | 1.56 |
| BMAA0776 | transcriptional regulator, LysR family                   | NaN  | 1.38 | NaN   | 1.51 | 1.42 | 1.82 | 2.08 | 1.33  | NaN  | 1.02 | 2.25 | 1.79 |
| BMAA0261 | conserved hypothetical protein                           | 1.38 | 1.24 | 1.32  | 1.04 | 1.79 | 1.56 | 1.97 | 1.52  | 1.44 | 0.76 | 1.98 | 1.79 |
| BMA1113  | conserved hypothetical protein                           | 3.89 | 3.29 | 2.56  | 2.60 | 3.64 | 3.82 | 1.71 | 1.27  | 3.31 | 2.97 | 1.99 | 1.67 |
| BMA1123  | peptide synthetase, putative                             | 1.06 | 1.57 | 1.02  | 1.45 | 1.80 | 1.95 | 1.45 | 1.29  | 1.44 | 1.72 | 2.10 | 1.71 |
| BMA0906  | thioesterase family protein                              | 1.28 | 1.53 | 1.16  | 0.77 | 0.68 | 1.52 | 1.79 | 2.19  | 1.22 | 1.32 | 2.02 | 1.72 |
| BMAA1983 | hypothetical protein                                     | 2.19 | 1.68 | 2.59  | 1.76 | 2.71 | 2.15 | 2.43 | 1.89  | 1.98 | 2.01 | 2.05 | 1.76 |
| BMA3158  | AMP-binding domain protein                               | 0.88 | 1.16 | 0.95  | 1.68 | 1.34 | 1.53 | 1.93 | 1.40  | 0.84 | 0.92 | 1.38 | 1.26 |
| BMAA1871 | propionate catabolism operon regulatory protein          | 1.29 | 2.36 | 1.23  | 1.70 | 1.58 | 2.09 | 1.53 | 2.49  | 1.86 | 2.24 | 1.30 | 1.20 |
| BMAA1149 | hypothetical protein                                     | 1.91 | 1.65 | 2.71  | NaN  | 2.57 | 2.24 | 1.93 | 1.20  | 2.04 | 2.05 | 1.42 | 1.05 |
| BMA0575  | hypothetical protein                                     | 1.24 | 1.57 | 1.58  | 1.40 | 1.39 | 1.71 | 1.65 | 1.26  | 1.51 | 1.16 | 1.45 | 1.13 |
| BMAA1895 | conserved domain protein                                 | 2.25 | 1.58 | 1.63  | 2.36 | 1.53 | 1.95 | 0.90 | 1.26  | 2.14 | 1.49 | 1.50 | 1.17 |
| BMAA1384 | hypothetical protein                                     | 2.31 | 2.37 | 3.27  | 2.75 | 2.70 | 3.06 | 2.43 | 1.16  | 2.98 | 1.81 | 1.30 | 1.01 |
| BMAA1617 | hrp protein, putative                                    | 0.31 | 0.36 | 0.34  | NaN  | 0.22 | 1.01 | 1.38 | 0.83  | NaN  | 0.38 | 1.25 | 1.09 |
| BMA1959  | MOSC domain protein                                      | 2.73 | 2.59 | 2.88  | 2.47 | 2.36 | 2.63 | 1.60 | 1.16  | 1.96 | 2.04 | 1.18 | 0.95 |
| BMAA1690 | luciferase-like monooxygenase                            | 1.46 | 1.84 | 1.73  | 1.96 | 2.50 | 2.30 | 1.87 | 1.81  | 1.71 | 1.73 | 1.18 | 0.96 |
| BMAA1423 | malate/L-lactate dehydrogenase family protein            | 0.29 | 0.59 | -0.15 | 0.71 | 0.29 | 0.84 | 1.74 | 0.87  | 0.05 | 0.50 | 1.16 | 1.18 |
| BMA2110  | conserved hypothetical protein                           | 1.62 | 1.54 | 1.61  | NaN  | 1.26 | 1.76 | 1.64 | 1.68  | 1.63 | 1.20 | 1.14 | 1.11 |
| BMAA0462 | rhamnosyltransferase II                                  | 3.22 | 2.99 | 3.11  | 3.28 | 3.27 | 3.16 | 2.23 | 2.36  | 2.98 | 2.63 | 1.11 | 1.11 |
| BMAA0619 | transcriptional regulator, MarR family                   | 1.76 | 1.80 | 1.79  | 2.00 | 1.59 | 2.04 | 2.19 | 2.02  | 1.34 | 1.46 | 1.17 | 1.11 |
| BMAA1902 | conserved hypothetical protein                           | 1.51 | 1.85 | NaN   | 1.75 | 2.73 | 1.82 | 2.24 | 1.50  | 2.37 | 1.72 | 1.17 | 1.07 |
| BMA0989  | hypothetical protein                                     | 2.57 | 1.76 | 2.78  | 2.53 | 1.89 | 1.80 | 1.51 | 1.20  | 2.37 | 1.94 | 0.99 | 1.08 |

|          |                                                                       |      |      |       |      |      |      |      |      |       |       |      |      |
|----------|-----------------------------------------------------------------------|------|------|-------|------|------|------|------|------|-------|-------|------|------|
| BMA2152  | LysE family protein                                                   | 3.22 | 3.14 | 2.51  | 2.82 | 3.06 | 2.77 | 1.65 | 2.55 | 2.82  | 3.07  | 0.96 | 1.11 |
| BMAA1011 | hypothetical protein                                                  | 0.25 | 0.41 | 0.84  | 0.65 | 0.73 | 0.60 | 1.18 | 1.12 | 0.96  | 0.52  | 0.93 | 1.11 |
| BMA0697  | cobryic acid synthase CobQ                                            | 0.94 | 1.37 | 1.12  | 1.79 | 1.93 | 1.96 | 1.97 | 1.56 | 1.21  | 1.37  | 1.06 | 1.13 |
| BMAA0011 | hypothetical protein                                                  | 1.57 | 0.91 | NaN   | 1.14 | 1.79 | 1.05 | 1.80 | 0.83 | 2.16  | 1.20  | 1.01 | 1.15 |
| BMAA1925 | hypothetical protein                                                  | 0.50 | 0.14 | 0.66  | 0.58 | 0.79 | 1.22 | 1.39 | 0.67 | 0.83  | 0.26  | 1.03 | 1.16 |
| BMAA0753 | SCO1/SenC family protein                                              | 0.68 | 0.87 | 0.47  | 0.94 | 0.93 | 1.21 | 1.39 | 0.97 | 0.86  | 0.79  | 1.02 | 1.01 |
| BMAA0449 | conserved hypothetical protein                                        | 2.09 | 2.37 | 1.39  | 2.57 | 2.07 | 2.73 | 1.43 | 1.65 | 1.44  | 1.95  | 1.04 | 0.94 |
| BMAA1920 | quinone oxidoreductase, putative                                      | 2.20 | 2.28 | 2.09  | 2.72 | 2.38 | 2.37 | 1.67 | 1.88 | 2.14  | 2.38  | 0.98 | 0.94 |
| BMAA1932 | transcriptional regulator, LysR family                                | NaN  | 1.21 | NaN   | NaN  | 0.16 | 1.17 | 0.87 | 0.78 | NaN   | 1.25  | 1.00 | 0.97 |
| BMA2134  | amino acid ABC transporter, periplasmic amino acid-binding protein    | 2.05 | 1.51 | 1.61  | 1.96 | 1.76 | 1.72 | 1.05 | 0.92 | 2.02  | 1.59  | 0.81 | 0.96 |
| BMA1683  | phosphoesterase, putative                                             | 1.77 | 2.18 | 1.61  | 2.36 | 1.84 | 2.34 | 2.13 | 2.03 | 1.52  | 1.81  | 0.78 | 0.92 |
| BMAA1187 | RNA polymerase sigma-70 factor, ECF subfamily                         | 1.76 | 1.03 | NaN   | NaN  | 0.62 | 1.42 | 1.40 | 1.60 | NaN   | 0.87  | 0.81 | 0.92 |
| BMAA0923 | rhamnosyltransferase family protein                                   | 2.79 | 2.49 | 2.50  | 2.89 | 2.60 | 2.71 | 2.28 | 1.88 | 2.47  | 1.95  | 0.89 | 0.89 |
| BMAA1211 | hypothetical protein                                                  | 3.36 | 3.12 | 3.08  | 3.29 | 2.97 | 3.09 | 2.39 | 2.60 | 2.88  | 2.90  | 0.85 | 0.90 |
| BMAA1032 | hypothetical protein                                                  | 0.83 | 1.11 | -0.12 | 1.10 | 1.27 | 1.37 | 0.47 | 1.57 | 1.09  | 1.18  | 0.86 | 1.01 |
| BMAA1973 | conserved hypothetical protein                                        | 2.18 | 2.27 | 1.45  | 2.18 | 1.82 | 2.35 | 1.73 | 2.18 | 1.96  | 2.01  | 0.86 | 1.05 |
| BMA0687  | iron compound ABC transporter, ATP-binding protein                    | 1.34 | 1.60 | 0.64  | 1.72 | 1.57 | 1.19 | 1.08 | 1.97 | 1.22  | 1.23  | 0.90 | 1.60 |
| BMA0930  | fosmidomycin resistance protein                                       | 3.22 | 2.77 | 2.64  | 2.79 | 2.97 | 2.36 | 1.32 | 1.70 | 2.67  | 2.36  | 0.97 | 1.56 |
| BMAA0577 | 2-hydroxy-3-oxopropionate reductase                                   | 1.11 | 1.08 | 0.32  | 1.59 | 1.64 | 1.67 | 0.50 | 0.76 | 1.30  | 1.74  | 1.03 | 1.48 |
| BMAA0755 | outer membrane nitrite reductase, putative                            | 2.56 | 2.56 | 2.78  | 2.95 | 2.80 | 2.53 | 2.49 | 2.47 | 2.94  | 2.48  | 0.97 | 1.44 |
| BMAA0616 | hypothetical protein                                                  | 1.10 | 0.95 | NaN   | 0.41 | 2.09 | 1.21 | 1.12 | 1.05 | 1.31  | 0.60  | 0.93 | 1.30 |
| BMA2007  | hypothetical protein                                                  | 2.38 | 2.60 | 1.55  | 2.86 | 2.32 | 2.16 | 1.15 | 1.60 | 2.12  | 1.94  | 0.78 | 1.18 |
| BMA3168  | transcriptional regulator, GntR family                                | 0.56 | 1.00 | 0.86  | NaN  | 1.19 | 1.21 | 1.02 | 0.79 | 0.32  | 1.01  | 0.83 | 1.17 |
| BMA1163  | precorrin-2 C20-methyltransferase                                     | 1.33 | 1.16 | 1.33  | 1.68 | 1.38 | 1.53 | 2.32 | 1.79 | 1.53  | 1.21  | 0.88 | 1.22 |
| BMAA1526 | BapA protein                                                          | 1.40 | 1.10 | 1.41  | 1.95 | 1.98 | 1.95 | 2.08 | 1.49 | 0.98  | 0.58  | 0.91 | 1.19 |
| BMAA1622 | conserved hypothetical protein                                        | 2.07 | 1.57 | 2.05  | 1.74 | 1.89 | 1.66 | 2.19 | 1.27 | 1.61  | 1.31  | 0.91 | 1.16 |
| BMAA0597 | hypothetical protein                                                  | 1.92 | 1.71 | 2.35  | 2.40 | 2.21 | 1.90 | 1.78 | 1.56 | 2.13  | 1.62  | 1.12 | 1.32 |
| BMA0156  | HpchH/Hpal aldolase family protein                                    | 1.36 | 1.41 | 0.98  | 1.59 | 1.47 | 1.36 | 1.54 | 2.09 | 1.46  | 1.21  | 1.05 | 1.26 |
| BMAA2031 | sulfate permease family protein                                       | 1.75 | 1.91 | 1.46  | 2.10 | 1.67 | 1.91 | 1.18 | 2.29 | 1.54  | 2.27  | 1.04 | 1.35 |
| BMA3323  | flagella basal body P-ring formation protein FlgA                     | 2.69 | 2.32 | 2.52  | 2.64 | 2.31 | 2.71 | 2.52 | 2.42 | 2.02  | 2.07  | 1.52 | 1.43 |
| BMAA0610 | di-haem cytochrome c peroxidase family protein                        | 1.43 | 1.31 | NaN   | NaN  | NaN  | 1.88 | 1.43 | 0.88 | NaN   | 1.42  | 1.50 | 1.50 |
| BMAA1133 | transcriptional regulator, AraC family                                | 1.73 | 1.30 | NaN   | 1.50 | 1.74 | 1.71 | 1.53 | 1.15 | 1.85  | 0.86  | 1.45 | 1.43 |
| BMAA1875 | hypothetical protein                                                  | 2.21 | 2.39 | 1.96  | 1.73 | 1.90 | 2.36 | 1.50 | 1.00 | 1.96  | 1.48  | 1.41 | 1.46 |
| BMA0551  | conserved hypothetical protein                                        | 2.34 | 1.76 | 2.04  | 2.52 | 2.55 | 2.26 | 2.74 | 2.01 | 2.68  | 1.96  | 1.50 | 1.31 |
| BMA2177  | branched-chain amino acid ABC transporter, permease protein, putative | 2.61 | 2.87 | 1.78  | 2.30 | 2.41 | 2.82 | 1.57 | 1.54 | 1.56  | 2.43  | 1.45 | 1.29 |
| BMA2978  | membrane protein, putative                                            | 1.90 | 2.48 | 1.36  | 1.60 | 1.58 | 2.29 | 1.05 | 1.20 | 1.16  | 1.51  | 1.58 | 1.36 |
| BMAA1927 | conserved domain protein                                              | 2.54 | 0.78 | 3.06  | 1.86 | 2.33 | 2.32 | 1.51 | 0.87 | 2.75  | 1.19  | 1.54 | 1.37 |
| BMA3058  | carotenoid 9,10-9',10' cleavage dioxygenase, putative                 | 1.83 | 1.85 | 1.61  | 2.03 | 1.95 | 2.03 | 2.14 | 1.74 | 2.12  | 1.57  | 1.27 | 1.38 |
| BMAA1190 | fumarylacetoacetate hydrolase family protein                          | 0.78 | 0.75 | -0.20 | 0.13 | 0.55 | 0.52 | 1.15 | 0.86 | NaN   | 0.58  | 1.14 | 1.40 |
| BMA0952  | RND efflux system, outer membrane lipoprotein, NodT family            | 1.13 | 1.35 | 1.03  | 1.48 | 0.98 | 1.57 | 1.94 | 2.03 | 1.43  | 1.18  | 1.20 | 1.44 |
| BMAA1621 | regulatory protein HrpB                                               | 2.10 | 2.29 | 1.91  | 2.61 | 1.93 | 2.37 | 2.44 | 2.46 | 1.88  | 2.05  | 1.18 | 1.47 |
| BMAA1986 | ADP-heptose--LPS heptosyltransferase II, putative                     | 1.35 | 1.70 | 2.02  | 2.06 | 1.51 | 1.81 | 1.79 | 1.64 | 1.59  | 1.27  | 1.32 | 1.54 |
| BMAA0367 | acetyltransferase, GNAT family                                        | 0.29 | 0.23 | -0.08 | 0.17 | 0.36 | 0.16 | 0.71 | 1.40 | -0.01 | -0.01 | 1.35 | 1.46 |
| BMA2855  | chemotaxis protein CheD                                               | 1.23 | 2.02 | 1.47  | 2.16 | 1.44 | 1.96 | 1.42 | 1.70 | 2.29  | 1.78  | 1.30 | 1.49 |
| BMAA1987 | glycosyl transferase, group 2 family protein                          | 1.20 | 1.53 | 0.69  | 1.75 | 1.88 | 1.47 | 1.46 | 1.74 | 1.11  | 1.10  | 1.31 | 1.47 |
| BMAA0407 | conserved hypothetical protein                                        | 0.98 | 1.39 | 0.80  | 1.25 | 1.38 | 1.14 | 0.61 | 1.75 | 1.20  | 1.55  | 1.07 | 1.68 |
| BMAA0798 | multicopper oxidase domain protein                                    | 2.52 | 2.29 | 1.97  | 2.75 | 2.37 | 2.30 | 1.86 | 1.83 | 2.08  | 2.06  | 1.05 | 1.78 |
| BMAA1045 | hydrophobe/amphiphile efflux family protein                           | 2.17 | 1.79 | 2.18  | 2.30 | 2.38 | 1.88 | 1.79 | 1.35 | 2.65  | 1.46  | 1.12 | 1.59 |
| BMAA1091 | regulatory protein NasS, putative                                     | 1.14 | 1.77 | 1.03  | 1.48 | 1.88 | 1.80 | 1.05 | 0.69 | 0.84  | 1.14  | 1.29 | 1.71 |

|                |                                                                           |       |       |       |       |       |       |       |       |       |       |       |       |
|----------------|---------------------------------------------------------------------------|-------|-------|-------|-------|-------|-------|-------|-------|-------|-------|-------|-------|
| BMAA0522       | hypothetical protein                                                      | 2.76  | 2.42  | 2.17  | 2.63  | 2.96  | 2.62  | 2.36  | 2.34  | 2.41  | 2.10  | 1.18  | 1.75  |
| BMAA0852       | aminotransferase, class V                                                 | 2.13  | 1.44  | 1.18  | 2.61  | NaN   | 2.15  | 1.77  | 1.66  | 1.32  | 1.56  | 1.17  | 1.74  |
| BMAA1098       | acetylpolyamine aminohydrolase, putative                                  | 1.65  | 1.85  | NaN   | 1.34  | 1.80  | 1.58  | 1.03  | 1.56  | 1.61  | 1.41  | 1.22  | 1.75  |
| BMAA1372       | conserved hypothetical protein                                            | 1.62  | 1.86  | 1.35  | 1.96  | 1.68  | 1.81  | 1.61  | 2.20  | 1.71  | 1.97  | 1.19  | 1.68  |
| BMAA0369       | indole-3-acetamide hydrolase-related protein                              | 2.14  | 2.44  | 2.13  | 2.35  | 2.01  | 2.55  | 2.32  | 2.30  | 2.01  | 2.14  | 1.51  | 1.78  |
| BMAA0630       | aldehyde dehydrogenase (NADP) family protein                              | 0.91  | 0.68  | 1.18  | 1.27  | 0.90  | 0.97  | 1.61  | 1.21  | 0.88  | 0.70  | 1.53  | 1.84  |
| BMA0258        | hypothetical protein                                                      | 0.99  | 1.16  | 1.50  | 1.63  | NaN   | 1.50  | 1.93  | 1.60  | 1.09  | 1.03  | 1.54  | 1.68  |
| BMAA1368       | conserved hypothetical protein                                            | 2.03  | 2.01  | NaN   | 1.37  | 1.46  | 1.66  | 1.72  | 1.85  | 2.04  | 1.79  | 1.47  | 1.70  |
| BMAA2016       | hypothetical protein                                                      | 0.98  | 1.44  | NaN   | 1.60  | 1.89  | 2.12  | 2.23  | 1.68  | 1.81  | 1.27  | 1.49  | 1.73  |
| BMAA0785       | sensor histidine kinase                                                   | 1.25  | 0.97  | 0.77  | 1.10  | 1.06  | 1.05  | 1.70  | 1.47  | 0.85  | 1.00  | 1.43  | 1.66  |
| BMAA0855       | ABC transporter, periplasmic substrate-binding protein                    | 2.43  | 2.67  | 3.05  | 3.19  | 2.44  | 3.16  | 2.65  | 2.14  | 2.09  | 2.60  | 1.46  | 1.58  |
| BMAA2082       | hypothetical protein                                                      | 1.93  | 1.71  | 1.93  | 2.12  | 2.04  | 2.06  | 1.46  | 1.81  | 2.00  | 2.02  | 1.42  | 1.59  |
| <b>Group 2</b> |                                                                           |       |       |       |       |       |       |       |       |       |       |       |       |
| BMA2331        | heat-inducible transcription repressor HrcA                               | -1.92 | -1.98 | -1.42 | -2.28 | -1.15 | -1.46 | -1.00 | -0.86 | -1.40 | -1.27 | 0.71  | 1.10  |
| BMA0335        | maltose/mannitol ABC transporter, permease protein, putative              | -1.47 | -0.51 | -2.00 | -2.78 | -1.15 | -1.22 | -1.67 | -2.04 | -1.60 | -1.36 | 0.69  | 0.88  |
| BMA0317        | RND efflux system, outer membrane lipoprotein, NodT family                | -1.15 | -1.01 | -0.40 | -2.42 | -1.22 | -1.19 | -1.11 | -1.19 | -1.74 | -1.74 | 0.73  | 0.92  |
| BMA1120        | histidinol-phosphate aminotransferase, putative, authentic point mutation | NaN   | -0.50 | NaN   | -3.75 | -0.95 | -1.88 | -1.79 | -2.02 | -1.16 | -1.37 | 0.76  | 0.87  |
| BMA1380        | molybdopterin converting factor, subunit 2                                | -0.46 | -1.77 | -0.74 | -0.92 | -0.81 | -1.38 | -0.24 | -0.84 | 0.01  | -0.16 | 0.62  | 0.75  |
| BMA2326        | chaperone protein DnaK                                                    | -2.14 | -1.31 | -1.93 | -0.99 | -1.34 | -1.17 | -1.36 | -0.81 | -1.06 | -0.92 | 0.57  | 0.84  |
| BMA0310        | serine protease                                                           | -0.95 | -0.71 | -1.05 | -1.04 | -0.48 | -0.74 | -0.23 | -0.34 | -2.42 | -2.63 | 0.58  | 0.80  |
| BMAA1232       | hypothetical protein                                                      | -1.16 | -0.33 | -2.60 | -2.15 | -0.74 | -0.93 | -0.98 | -0.62 | -2.68 | -2.44 | 0.59  | NaN   |
| BMA2841        | membrane protein, putative                                                | -2.77 | -2.69 | -1.70 | -1.67 | -2.39 | -2.92 | -1.82 | -1.43 | -3.98 | -3.63 | 0.87  | 0.22  |
| BMA1555        | ribosomal plpN S2                                                         | -4.04 | -3.32 | -1.57 | -1.95 | -2.97 | -2.50 | -1.77 | -1.42 | -2.28 | -1.92 | 1.00  | 0.55  |
| BMA1355        | lipoprotein NlpD, putative                                                | -2.02 | -1.74 | -1.04 | -1.07 | -1.06 | -1.34 | -0.74 | -0.33 | -0.45 | -1.00 | 0.86  | 0.62  |
| BMA1736        | DNA-binding response regulator NarL                                       | -1.85 | -2.39 | -0.93 | NaN   | -0.57 | -1.23 | -0.01 | -0.05 | NaN   | 0.02  | 0.84  | NaN   |
| BMAA0424       | membrane protein, putative                                                | -2.23 | -1.28 | -2.74 | -1.16 | -2.99 | -1.21 | -1.14 | -0.91 | -2.41 | -1.24 | 0.89  | 0.83  |
| BMAA1092       | GTP cyclohydrolase I                                                      | -1.70 | -0.56 | -2.01 | NaN   | -1.24 | -0.04 | -0.50 | -0.53 | NaN   | -0.83 | 0.91  | 0.91  |
| BMA1708        | cysteine desulfurase                                                      | -1.04 | -1.25 | -0.76 | -1.75 | -1.15 | -0.82 | -1.20 | -0.92 | -1.95 | -1.95 | 0.42  | 0.68  |
| BMA0189        | 2-polyprenylphenol 6-hydroxylase                                          | -1.85 | -1.93 | -0.36 | -0.94 | -0.74 | -1.45 | -0.26 | -0.74 | -0.41 | -0.73 | 0.42  | 0.63  |
| BMA3005        | site-specific recombinase, phage integrase family                         | NaN   | NaN   | NaN   | -1.50 | -2.33 | -2.99 | -2.25 | -2.23 | NaN   | -2.15 | NaN   | NaN   |
| BMA0533        | acyl carrier protein                                                      | -4.18 | -4.21 | -3.32 | -4.15 | -4.79 | -4.41 | -3.70 | -3.11 | -3.89 | -3.96 | 0.47  | 0.54  |
| BMA1303        | conserved hypothetical protein                                            | NaN   | -1.49 | NaN   | NaN   | -1.22 | -1.70 | -0.51 | -1.16 | NaN   | -1.21 | 0.53  | 0.54  |
| BMAA0802       | isovaleryl-CoA dehydrogenase                                              | -1.67 | -2.23 | -3.05 | -2.98 | -1.29 | -1.87 | -2.25 | -2.25 | -0.42 | -0.51 | 0.55  | 0.57  |
| BMA3195        | cytochrome c oxidase assembly protein ctaG, putative                      | -1.73 | -2.29 | -0.91 | -2.88 | -1.21 | -2.06 | -1.59 | -1.99 | -0.55 | -1.36 | 0.53  | 0.35  |
| BMAA1496       | amino acid ABC transporter, periplasmic amino acid-binding protein        | -1.10 | -0.58 | -1.00 | -1.16 | -1.48 | -1.64 | -0.65 | -0.78 | -1.37 | -1.58 | 0.67  | 0.39  |
| BMAA0339       | RNA polymerase sigma factor RpoD                                          | -2.34 | -2.96 | -1.37 | -2.24 | -2.04 | -2.94 | -2.25 | -2.38 | -2.26 | -2.51 | 1.04  | 1.56  |
| BMA2001        | chaperonin, 60 kDa                                                        | -0.90 | -3.26 | -1.80 | -0.78 | -1.52 | -0.82 | -2.09 | -1.43 | -1.82 | -1.67 | 1.42  | 1.28  |
| BMA0097        | oxidoreductase, short chain dehydrogenase/reductase family                | -1.59 | -1.48 | -1.94 | -0.50 | -0.84 | -0.75 | 0.27  | 0.04  | -0.14 | -0.06 | 1.44  | 1.33  |
| BMA2536        | conserved hypothetical protein                                            | NaN   | -1.42 | NaN   | NaN   | NaN   | -1.89 | -1.61 | -1.14 | NaN   | -1.43 | NaN   | NaN   |
| BMA2633        | ribosomal protein S10                                                     | -2.58 | -2.80 | NaN   | -2.73 | -2.66 | -3.31 | -2.20 | -2.19 | -2.80 | -2.95 | 1.20  | 0.96  |
| BMAA1745       | conserved hypothetical protein                                            | -2.25 | -2.73 | -1.38 | -1.50 | -1.91 | -2.16 | -0.96 | -0.47 | -1.72 | -0.89 | 1.33  | 1.05  |
| BMA2303        | glycosyl transferase, group 1 family protein                              | -0.83 | -1.66 | -1.36 | -2.14 | -1.60 | -2.35 | -2.19 | -2.27 | -1.76 | -1.56 | -2.61 | -2.76 |
| BMA0497        | site-specific recombinase, phage integrase family, truncation             | -2.56 | -2.50 | -2.36 | -3.14 | -2.28 | -2.48 | -2.77 | -2.49 | -3.74 | -2.76 | -2.57 | -2.90 |
| BMA2884        | hypothetical protein                                                      | -0.84 | -0.78 | 0.15  | -0.78 | -2.64 | -2.61 | -2.54 | -2.50 | NaN   | -0.63 | -2.62 | -2.93 |
| BMA2523        | ribosomal protein L21                                                     | -5.59 | -5.31 | -3.46 | -4.43 | -5.09 | -4.71 | -3.79 | -3.27 | -5.03 | -4.39 | -2.77 | -2.99 |
| BMA2647        | preprotein translocase, SecE subunit                                      | -3.79 | -2.65 | NaN   | -4.07 | -4.50 | -3.84 | -3.25 | -2.98 | -4.24 | -3.54 | -2.57 | -3.09 |
| BMA2952        | ATP synthase F0, C subunit                                                | -3.84 | -4.39 | -3.43 | -3.34 | -4.10 | -4.11 | -3.21 | -2.89 | -4.18 | -3.98 | -2.75 | -3.20 |
| BMAA0727       | GTP cyclohydrolase I                                                      | NaN   | -1.06 | NaN   | NaN   | NaN   | -1.23 | -2.04 | -1.60 | -3.43 | -2.88 | -2.20 | -2.06 |
| BMAA1286       | outer membrane porin, putative                                            | -2.60 | -1.92 | -2.48 | -3.21 | -3.21 | -3.36 | -2.16 | -1.94 | -3.28 | -2.93 | -2.14 | -2.06 |

|          |                                                          |       |       |       |       |       |       |       |       |       |       |       |       |
|----------|----------------------------------------------------------|-------|-------|-------|-------|-------|-------|-------|-------|-------|-------|-------|-------|
| BMA1829  | NADH dehydrogenase I, A subunit                          | -3.64 | -3.10 | -2.91 | -2.64 | -3.21 | -2.61 | -2.39 | -2.26 | -3.30 | -2.63 | -1.88 | -2.15 |
| BMA2302  | capsular polysaccharide biosynthesis protein, putative   | -1.31 | -0.90 | -0.08 | -2.05 | -1.71 | -2.13 | -2.42 | -2.32 | -2.03 | -1.46 | -1.84 | -2.19 |
| BMA1319  | polyhydroxyalkanoate synthesis repressor PhaR            | -3.70 | -2.59 | -3.51 | -3.28 | -3.63 | -3.11 | -2.33 | -2.06 | -3.54 | -2.71 | -1.97 | -2.23 |
| BMA1414  | phosphate starvation-inducible protein                   | -3.21 | -3.20 | -3.70 | -3.70 | -4.15 | -3.57 | -2.02 | -2.30 | -3.08 | -2.50 | -1.94 | -2.26 |
| BMA2082  | outer membrane protein, OmpA family                      | -4.05 | -3.16 | -3.28 | -3.56 | -4.03 | -3.48 | -2.78 | -2.24 | -4.04 | -3.69 | -1.95 | -2.17 |
| BMA2607  | ribosomal protein S4                                     | -2.49 | -3.63 | -1.04 | -2.79 | -3.23 | -3.99 | -2.78 | -2.80 | -3.58 | -3.03 | -1.91 | -2.20 |
| BMA2956  | ATP synthase F1, gamma subunit                           | -3.21 | -2.90 | -2.01 | -3.71 | -4.25 | -4.25 | -3.21 | -3.03 | -3.57 | -3.04 | -1.92 | -2.06 |
| BMA2918  | transcriptional regulator, MarR family                   | -3.01 | -2.86 | -2.52 | -3.59 | -3.94 | -3.91 | -2.48 | -2.52 | -2.91 | -2.87 | -1.99 | -2.05 |
| BMAA0017 | D-beta-hydroxybutyrate dehydrogenase                     | -2.23 | -2.63 | -2.25 | -2.44 | -2.66 | -2.55 | -2.13 | -2.22 | -2.66 | -2.26 | -2.04 | -2.04 |
| BMA1512  | ISBma1, transposase                                      | -1.42 | -1.39 | -1.81 | -2.17 | -2.50 | -2.53 | -2.16 | -1.99 | -2.32 | -1.98 | -2.05 | -2.12 |
| BMA1835  | ribosomal protein S15                                    | -2.82 | -3.01 | -2.36 | -2.18 | -3.08 | -2.83 | -2.21 | -1.89 | -2.94 | -1.96 | -2.04 | -2.10 |
| BMA1843  | 2-isopropylmalate synthase, authentic frameshift         | -2.45 | -2.59 | -1.29 | -2.47 | -2.61 | -2.61 | -2.08 | -1.95 | -2.27 | -2.02 | -2.01 | -2.14 |
| BMAA0445 | Rhs element Vgr protein                                  | NaN   | NaN   | NaN   | NaN   | -1.29 | -0.74 | -1.92 | -1.64 | -1.48 | -1.36 | -1.99 | -2.13 |
| BMA2618  | ribosomal protein S8                                     | -5.00 | -4.30 | NaN   | -3.99 | -4.64 | -4.84 | -3.23 | -3.28 | -4.63 | -3.95 | -1.87 | -2.30 |
| BMA1333  | adenylosuccinate synthetase                              | -2.97 | -2.01 | -2.41 | -2.97 | -3.06 | -2.89 | -2.00 | -1.38 | -3.17 | -2.59 | -1.83 | -2.37 |
| BMA2957  | ATP synthase F1, beta subunit                            | -2.62 | -2.50 | -1.96 | -3.03 | -2.97 | -3.15 | -2.53 | -2.88 | -3.69 | -2.42 | -1.87 | -2.37 |
| BMA2621  | ribosomal protein L24                                    | -2.99 | -3.70 | -0.97 | -3.04 | -3.76 | -4.12 | -3.07 | -3.36 | -3.91 | -3.13 | -2.03 | -2.42 |
| BMAA1350 | CBS domain protein                                       | -3.04 | -2.21 | -2.69 | -2.55 | -2.72 | -2.58 | -1.77 | -1.60 | -3.31 | -2.60 | -1.95 | -2.44 |
| BMA0742  | nitrogen regulatory protein P-II                         | -1.81 | -1.78 | NaN   | -2.38 | -2.02 | -2.20 | -1.46 | -1.29 | -2.30 | -2.28 | -2.03 | -2.30 |
| BMAA1749 | succinate dehydrogenase, cytochrome b556 subunit         | -2.81 | -3.82 | -3.03 | -2.79 | -3.67 | -3.83 | -2.21 | NaN   | -2.03 | -2.16 | -2.07 | -2.24 |
| BMA0376  | conserved hypothetical protein                           | -1.94 | -1.77 | -1.40 | -1.60 | -1.98 | -1.72 | -1.36 | -0.70 | -2.24 | -1.65 | -2.50 | -2.48 |
| BMA2630  | ribosomal protein L23                                    | -3.59 | -3.40 | NaN   | -3.00 | -3.90 | -3.92 | -2.71 | -2.94 | -3.23 | -1.49 | -2.44 | -2.46 |
| BMA2689  | conserved hypothetical protein                           | -2.58 | -2.46 | -2.39 | -2.58 | -2.52 | -2.15 | -1.51 | -1.81 | -2.40 | -1.72 | -2.43 | -2.45 |
| BMAA0081 | conserved domain protein                                 | -1.12 | -0.24 | -2.06 | -1.42 | -1.97 | -1.69 | -2.11 | -0.57 | -1.94 | -1.34 | -2.43 | -2.44 |
| BMAA1646 | peptide synthetase, putative                             | -0.32 | -0.19 | -0.33 | -1.73 | 0.08  | -0.35 | -1.81 | -1.29 | -1.41 | -1.22 | -2.43 | -2.25 |
| BMA2306  | capsular polysaccharide export inner-membrane protein    | -1.34 | -2.01 | -1.14 | -2.10 | -2.78 | -2.63 | -2.96 | -2.42 | -2.51 | -2.16 | -2.22 | -2.30 |
| BMA1984  | O-antigen acetylase, putative                            | -1.61 | -0.90 | -0.76 | -1.70 | -2.74 | -2.35 | -2.69 | -1.98 | -2.23 | -1.80 | -2.23 | -2.40 |
| BMAA1261 | bacterial extracellular solute-binding protein, family 5 | -1.61 | -1.41 | NaN   | -1.09 | -1.50 | -1.87 | -1.06 | -0.79 | -1.07 | -1.31 | -2.23 | -2.42 |
| BMA0436  | OmpA family protein                                      | -3.18 | -4.05 | -2.32 | -2.66 | -3.63 | -4.34 | -3.57 | -2.65 | -3.91 | -3.09 | -2.10 | -2.50 |
| BMA2975  | transcriptional regulator, merR family                   | -1.69 | -1.71 | -2.10 | -1.73 | -1.21 | -1.32 | -0.32 | -0.99 | -1.88 | -1.30 | -2.11 | -2.56 |
| BMAA1514 | hypothetical protein                                     | -1.28 | -0.84 | NaN   | NaN   | NaN   | -0.84 | -1.80 | -1.22 | -1.72 | -1.25 | -2.24 | -2.54 |
| BMA1327  | conserved hypothetical protein                           | -4.71 | -2.87 | -4.47 | -4.31 | -4.06 | -4.06 | -2.59 | -2.66 | -4.99 | -3.61 | -2.20 | -2.65 |
| BMAA1798 | bacterioferritin                                         | -4.81 | -3.39 | -4.44 | -3.77 | -5.23 | -3.91 | -2.92 | -2.28 | -3.00 | -2.25 | -2.18 | -2.65 |
| BMAA0548 | hypothetical protein                                     | -5.60 | -6.36 | -3.13 | -6.71 | -6.92 | -6.74 | -6.67 | -5.39 | -6.71 | -5.10 | 0.47  | -1.44 |
| BMAA0309 | AMP nucleosidase                                         | -1.36 | -1.46 | -1.65 | -2.43 | -1.44 | -0.76 | -1.92 | -0.56 | -1.90 | -2.16 | 0.12  | -0.85 |
| BMA2097  | conserved hypothetical protein TIGR00255                 | -2.74 | -2.44 | NaN   | -1.75 | -1.69 | -2.02 | -1.38 | -1.14 | NaN   | -1.23 | 0.13  | -0.38 |
| BMA0704  | conserved hypothetical protein                           | -3.28 | -2.48 | -2.91 | -2.81 | -1.96 | -1.76 | -0.78 | -0.46 | -2.55 | -2.07 | 0.05  | -0.46 |
| BMA2703  | twin-arginine translocation protein, TatA/E family       | -3.26 | -2.50 | -3.49 | -3.04 | -3.10 | -3.27 | -1.97 | -2.21 | -2.53 | -2.90 | 0.00  | -0.38 |
| BMA1485  | DNA-binding response regulator RisA                      | -2.87 | -2.24 | -2.28 | -2.27 | -1.87 | -1.32 | -0.61 | -0.61 | -1.68 | -1.44 | 0.29  | -0.50 |
| BMA0626  | conserved hypothetical protein                           | -1.09 | -1.34 | NaN   | NaN   | -1.75 | -1.88 | -0.35 | -0.55 | NaN   | 0.03  | 0.10  | -0.56 |
| BMA2624  | ribosomal protein L29                                    | -3.14 | -2.99 | NaN   | -2.32 | -3.04 | -3.15 | -1.72 | -1.39 | -2.07 | -2.42 | 0.21  | -0.54 |
| BMAA0699 | hypothetical protein                                     | -2.53 | -1.86 | -2.50 | -0.90 | -2.10 | -1.76 | -0.62 | -0.45 | NaN   | -1.31 | 0.19  | -0.62 |
| BMA0390  | conserved hypothetical protein                           | -1.74 | -1.30 | -0.64 | -1.26 | -0.97 | -1.56 | -0.24 | -0.77 | -1.29 | -1.54 | 0.08  | 0.31  |
| BMA1365  | transcription termination factor Rho                     | -1.15 | -2.34 | -0.72 | -1.72 | -2.05 | -2.01 | -1.20 | -1.72 | -2.25 | -1.95 | 0.08  | 0.25  |
| BMA1090  | integration host factor, alpha subunit                   | -0.82 | -1.27 | -0.51 | -1.02 | -1.35 | -1.93 | -1.01 | -1.53 | -1.01 | -1.11 | -0.05 | 0.30  |
| BMA1348  | nucleoside diphosphate kinase                            | -3.58 | -3.04 | -2.29 | -2.73 | -3.38 | -3.35 | -2.72 | -2.30 | -3.31 | -2.58 | -0.11 | NaN   |
| BMA0083  | conserved hypothetical protein                           | -1.25 | -1.24 | -1.71 | -1.38 | -1.30 | -1.39 | -0.92 | -1.43 | -1.65 | -1.52 | -0.11 | 0.34  |
| BMA1545  | UDP-3-O-3-hydroxymyristoyl glucosamine N-acyltransferase | -1.79 | -1.34 | NaN   | -1.57 | -1.31 | -1.95 | -0.55 | -0.79 | NaN   | -1.20 | NaN   | NaN   |
| BMA2083  | conserved hypothetical protein                           | -2.74 | -3.07 | -2.22 | -1.98 | -2.31 | -2.88 | -2.04 | -2.14 | -2.52 | -3.07 | -0.03 | 0.46  |

|          |                                                                 |       |       |       |       |       |       |       |       |       |       |       |       |
|----------|-----------------------------------------------------------------|-------|-------|-------|-------|-------|-------|-------|-------|-------|-------|-------|-------|
| BMA0377  | ribosomal protein S20                                           | -2.55 | -2.81 | NaN   | -2.13 | -2.64 | -2.67 | -1.91 | -0.78 | -2.92 | -2.33 | 0.26  | 0.54  |
| BMA2640  | DNA-directed RNA polymerase, beta subunit                       | -1.56 | -2.07 | -0.18 | -2.23 | -2.24 | -2.74 | -1.90 | -1.67 | -2.47 | -2.79 | 0.21  | 0.46  |
| BMAA0998 | hypothetical protein                                            | -0.74 | -1.03 | -2.01 | -2.91 | -0.45 | -1.14 | -1.47 | -1.20 | -0.02 | -0.72 | 0.16  | 0.44  |
| BMA0292  | conserved hypothetical protein                                  | -2.47 | -2.22 | NaN   | -1.79 | -1.88 | -2.58 | -1.11 | -1.05 | NaN   | -1.57 | -0.46 | NaN   |
| BMAA1046 | RND efflux system, outer membrane lipoprotein, NodT family      | -1.04 | -1.08 | NaN   | -2.69 | -1.38 | -1.91 | -1.23 | -1.09 | -2.43 | -2.19 | NaN   | 0.70  |
| BMA2610  | ribosomal protein L36                                           | -4.27 | -3.37 | -2.39 | -3.17 | -3.92 | -3.86 | -2.38 | -1.76 | -3.01 | -2.86 | 0.40  | -0.13 |
| BMA0864  | H-NS histone family protein                                     | -1.43 | -1.35 | NaN   | NaN   | -1.54 | -1.92 | -0.06 | -0.05 | NaN   | NaN   | 0.53  | -0.54 |
| BMA0188  | conserved hypothetical protein                                  | -2.03 | -1.74 | -1.36 | NaN   | -1.43 | -1.77 | -1.10 | -0.94 | NaN   | -1.27 | 0.51  | NaN   |
| BMA2905  | H-NS histone family protein                                     | -2.33 | -1.09 | -2.20 | -3.12 | -1.95 | -2.63 | -2.15 | -1.89 | -1.93 | -1.97 | NaN   | NaN   |
| BMA1145  | arginine deiminase                                              | -4.18 | -3.10 | -3.70 | -0.36 | -1.63 | -1.33 | 0.02  | -0.22 | -0.02 | -0.08 | 0.20  | 0.10  |
| BMAA1189 | transcriptional regulator, AraC family                          | -0.51 | -0.15 | -2.03 | 0.18  | -2.65 | -0.96 | -0.79 | 0.17  | -1.62 | -0.59 | 0.18  | 0.08  |
| BMAA1315 | hypothetical protein                                            | -1.77 | -1.46 | -2.20 | -3.41 | -0.97 | -1.21 | -1.31 | -1.07 | NaN   | -0.81 | 0.21  | 0.17  |
| BMA0375  | ornithine carbamoyltransferase                                  | -2.51 | -2.82 | -2.26 | -2.33 | -1.66 | -1.99 | -0.88 | -1.60 | -1.98 | -2.32 | 0.26  | 0.34  |
| BMA1530  | TGS domain protein                                              | NaN   | -1.74 | NaN   | NaN   | -1.01 | -0.96 | NaN   | -0.31 | NaN   | -1.46 | 0.28  | 0.29  |
| BMA2471  | glyoxalase family protein                                       | NaN   | -1.66 | NaN   | NaN   | -0.47 | -1.65 | -1.16 | -1.26 | NaN   | -1.27 | 0.24  | 0.25  |
| BMA2728  | thiamin biosynthesis ThiG                                       | -2.31 | -2.22 | -2.18 | -1.42 | -1.92 | -2.07 | -0.75 | -1.06 | -1.38 | -2.18 | 0.23  | 0.25  |
| BMA2550  | UDP-N-acetylmuramate--alanine ligase                            | -2.24 | -2.15 | NaN   | -1.79 | -1.55 | -1.60 | -1.08 | -0.93 | NaN   | -1.26 | 0.32  | NaN   |
| BMA0546  | pyridoxal phosphate biosynthetic protein PdxJ                   | -1.11 | -1.21 | -1.39 | -1.46 | -1.22 | -1.77 | -1.15 | -1.05 | NaN   | -0.20 | 0.35  | NaN   |
| BMAA0899 | cold-shock domain family protein                                | -2.71 | -2.00 | -2.44 | -3.07 | -3.43 | -3.30 | -2.66 | -2.38 | -3.38 | -3.38 | 0.35  | 0.05  |
| BMA2558  | cell division protein FtsL, putative                            | NaN   | -1.83 | NaN   | -1.02 | -1.56 | -2.21 | -1.28 | -0.28 | -0.60 | -1.54 | 0.37  | NaN   |
| BMAA1318 | hypothetical protein                                            | -1.61 | -1.44 | -1.74 | -1.33 | -0.15 | -0.81 | -0.55 | -0.30 | NaN   | -0.24 | 0.39  | 0.35  |
| BMAA0302 | hypothetical protein                                            | -5.55 | -4.59 | -5.17 | -3.57 | -5.54 | -3.34 | -1.94 | -1.64 | -3.61 | -3.20 | 0.55  | 0.13  |
| BMA3120  | ribose-phosphate pyrophosphokinase                              | -2.01 | -1.51 | NaN   | -1.90 | -2.66 | -2.62 | -1.82 | -1.48 | -1.76 | -1.53 | 0.45  | 0.11  |
| BMAA0505 | glutamyl-tRNA reductase                                         | -2.68 | -2.38 | -1.46 | -2.33 | -1.74 | -2.02 | -1.01 | -0.83 | -0.90 | -0.94 | 0.42  | 0.20  |
| BMAA1555 | hypothetical protein                                            | -2.87 | -1.32 | -1.70 | -2.35 | NaN   | -0.92 | -1.07 | -0.42 | -2.49 | -1.90 | 0.43  | 0.16  |
| BMA0976  | conserved hypothetical protein                                  | -3.56 | -3.55 | -3.54 | -3.83 | NaN   | -0.20 | -2.80 | -2.42 | NaN   | -0.01 | -0.29 | -0.09 |
| BMA1985  | polysaccharide ABC transporter, ATP-binding protein             | -0.85 | -0.31 | -0.03 | -1.27 | -1.41 | -2.04 | -1.95 | -1.63 | -1.30 | -1.52 | -0.29 | -0.03 |
| BMA2722  | conserved hypothetical protein                                  | -1.06 | -1.58 | -1.06 | -1.29 | -1.19 | -1.88 | -1.06 | -1.20 | -1.36 | -1.10 | -0.22 | 0.00  |
| BMA1703  | ferredoxin, 2Fe-2S                                              | NaN   | -1.29 | NaN   | -3.01 | -1.56 | -1.85 | -1.73 | -1.46 | -2.03 | -2.76 | -0.29 | -0.27 |
| BMA2446  | 6-phosphogluconate dehydratase                                  | -1.29 | -0.88 | -1.91 | -1.49 | -1.67 | -2.06 | -1.13 | -0.82 | -1.38 | -0.81 | -0.31 | -0.18 |
| BMA1417  | glycosyl transferase, group 1 family protein                    | NaN   | -1.40 | NaN   | -1.91 | -1.34 | -1.85 | -1.64 | -1.35 | NaN   | -1.29 | -0.20 | -0.30 |
| BMA0373  | conserved hypothetical protein                                  | -3.43 | -3.32 | -2.78 | -2.28 | -2.96 | -2.92 | -1.69 | -1.47 | -2.28 | -2.24 | -0.14 | -0.24 |
| BMA0619  | cyclic nucleotide-binding domain protein                        | -1.62 | -2.12 | -1.57 | 0.10  | -1.45 | -2.25 | -0.55 | -0.90 | -0.22 | -0.11 | -0.17 | -0.26 |
| BMA1440  | conserved hypothetical protein                                  | NaN   | -1.07 | NaN   | -2.00 | NaN   | -0.16 | -0.88 | -1.12 | NaN   | NaN   | -0.17 | NaN   |
| BMA1404  | ribosomal protein S6                                            | -2.62 | -3.56 | -0.59 | -2.64 | -3.26 | -3.50 | -2.32 | -2.36 | -3.29 | -2.63 | -0.24 | -0.37 |
| BMA2002  | chaperonin, 10 kDa                                              | -1.06 | -0.71 | -0.96 | -2.37 | -3.62 | -2.19 | -2.41 | -1.77 | -3.98 | -2.64 | -0.23 | NaN   |
| BMA2994  | glycine cleavage system H protein                               | -3.92 | -3.59 | -3.59 | -2.67 | -2.01 | -2.12 | -2.02 | -1.80 | -2.39 | -2.26 | -0.25 | -0.43 |
| BMA1364  | thioredoxin                                                     | -2.49 | -0.81 | -1.70 | -2.32 | -2.36 | -2.28 | -1.75 | -1.63 | -1.99 | -1.97 | -0.26 | -0.41 |
| BMA3219  | conserved hypothetical protein                                  | -2.31 | -1.80 | -2.23 | -1.53 | -1.79 | -2.63 | -1.20 | -1.29 | -0.83 | -1.37 | -0.26 | -0.40 |
| BMA2281  | ATP-dependent Clp protease, ATP-binding subunit ClpA            | -2.92 | -2.64 | -3.45 | -2.98 | -2.42 | -2.29 | -2.25 | -1.72 | -2.96 | -2.27 | -0.14 | -0.41 |
| BMAA0896 | ribosomal protein S21                                           | NaN   | NaN   | NaN   | NaN   | -1.41 | -1.02 | -0.70 | -0.51 | -2.41 | -2.00 | -0.18 | -0.45 |
| BMA0337  | maltose/mannitol ABC transporter, ATP-binding protein, putative | -0.78 | -0.77 | -1.80 | -3.27 | -1.57 | -1.70 | -2.03 | -2.32 | -2.07 | -2.14 | -0.10 | 0.00  |
| BMA1489  | 2C-methyl-D-erythritol 2,4-cyclodiphosphate synthase            | -1.32 | -1.18 | -1.13 | -1.77 | -1.36 | -1.78 | -1.12 | -0.52 | -1.47 | -1.70 | -0.10 | 0.11  |
| BMA0400  | ribosomal protein L19                                           | -2.55 | -3.12 | -0.79 | -2.80 | -3.80 | -3.66 | -2.77 | -2.20 | -2.65 | -1.89 | 0.06  | 0.07  |
| BMA1498  | PspA/IM30 family protein                                        | -1.42 | -1.23 | -1.20 | -0.83 | -0.87 | -1.19 | -0.72 | -1.03 | -2.78 | -2.07 | 0.07  | 0.05  |
| BMA1660  | UDP-2,3-diacetylglucosamine hydrolase                           | -1.15 | -1.35 | -0.35 | -1.16 | -0.33 | -0.91 | NaN   | -1.01 | NaN   | -0.99 | -0.01 | 0.10  |
| BMA0699  | ParA family protein                                             | -1.57 | -1.52 | -1.69 | -1.97 | -1.84 | -2.03 | -0.97 | -0.81 | -1.81 | -1.68 | -0.02 | 0.02  |
| BMA0673  | DNA polymerase III, chi subunit, putative                       | -1.52 | -0.96 | NaN   | -1.34 | -1.84 | -1.22 | -0.72 | -0.52 | NaN   | -1.04 | -0.03 | 0.03  |
| BMA1996  | conserved hypothetical protein TIGR00250                        | NaN   | -2.29 | -1.78 | NaN   | NaN   | -1.35 | -1.12 | -1.14 | NaN   | NaN   | -0.04 | NaN   |



|          |                                                                    |       |       |       |       |       |       |       |       |       |       |       |       |
|----------|--------------------------------------------------------------------|-------|-------|-------|-------|-------|-------|-------|-------|-------|-------|-------|-------|
| BMA1649  | hypothetical protein                                               | -1.44 | -0.85 | -0.79 | -1.66 | -1.04 | -0.89 | -0.48 | -0.52 | -1.92 | -0.58 | 0.03  | 0.00  |
| BMA1702  | conserved hypothetical protein                                     | NaN   | -0.61 | NaN   | -1.58 | -0.73 | -1.40 | -1.30 | -1.12 | NaN   | -1.67 | 0.02  | NaN   |
| BMA2174  | rhodanese-like domain protein                                      | -1.52 | -1.49 | NaN   | -1.69 | -1.96 | -2.01 | -0.98 | -1.80 | NaN   | -1.31 | 0.02  | NaN   |
| BMA2474  | barstar family protein                                             | -1.78 | -1.67 | -0.90 | -1.81 | -1.63 | -2.36 | -1.45 | -1.24 | -2.03 | -2.31 | 0.01  | 0.00  |
| BMA1533  | SPFH domain/band 7 family protein                                  | -2.03 | -2.30 | -2.78 | -1.61 | -3.24 | -2.31 | -1.72 | -1.23 | -3.19 | -2.03 | -0.05 | -0.17 |
| BMA2229  | peptidyl-prolyl cis-trans isomerase, FKBP-type                     | -3.34 | -3.25 | -2.64 | -2.40 | -2.38 | -2.57 | -1.38 | -1.40 | -2.26 | -2.08 | -0.03 | -0.15 |
| BMA2181  | urease accessory protein UreD                                      | -1.29 | -0.41 | -1.95 | -0.79 | -1.46 | -0.19 | -0.91 | -0.42 | -1.66 | -0.54 | 0.07  | -0.23 |
| BMA2609  | ribosomal protein S13                                              | -3.41 | -2.65 | -2.64 | -2.77 | -3.62 | -2.87 | -2.66 | -2.36 | -3.38 | -2.88 | 0.10  | -0.25 |
| BMA2616  | ribosomal protein L18                                              | -3.14 | -2.84 | NaN   | -2.54 | -3.18 | -3.00 | -1.88 | -2.16 | -2.85 | -2.32 | 0.04  | -0.28 |
| BMA3379  | glucosamine--fructose-6-phosphate aminotransferase, isomerizing    | -1.77 | -1.24 | NaN   | -1.38 | -1.34 | -1.79 | -0.87 | -0.61 | NaN   | -1.18 | 0.04  | NaN   |
| BMA2074  | conserved hypothetical protein TIGR00244                           | -1.00 | -1.41 | 0.08  | -1.16 | -0.95 | -1.59 | -0.98 | -1.07 | -1.55 | -2.19 | 0.11  | -0.11 |
| BMA2518  | pyrophosphatase, MutT/nudix family                                 | -1.89 | -2.13 | -1.04 | -2.89 | -1.46 | -1.96 | -2.20 | -1.92 | -2.17 | -2.14 | 0.17  | -0.12 |
| BMAA0361 | hypothetical protein                                               | -1.85 | -1.37 | -1.97 | -1.89 | -1.67 | -1.59 | -0.53 | -0.43 | -1.70 | -1.58 | 0.12  | -0.04 |
| BMAA1592 | hipB domain protein                                                | -1.64 | -1.47 | -0.46 | NaN   | -1.24 | -1.35 | -0.01 | -0.13 | NaN   | -1.03 | 0.15  | -0.06 |
| BMAA2098 | glutamine ABC transporter, periplasmic glutamine-binding protein   | -2.39 | -2.22 | -2.27 | -3.00 | -2.90 | -3.28 | -1.32 | -0.74 | -3.04 | -2.69 | -0.67 | -0.02 |
| BMA1857  | transcriptional regulator, TetR family                             | -2.83 | -1.69 | -3.07 | -2.44 | -2.36 | -2.32 | -1.27 | -0.77 | -2.72 | -2.63 | -1.03 | -0.35 |
| BMA1522  | GMP synthase                                                       | -1.58 | -1.91 | -0.80 | -1.16 | -1.20 | -1.73 | -0.33 | -0.32 | -1.31 | -1.13 | -1.18 | -0.86 |
| BMA0002  | DNA polymerase III, beta subunit                                   | -2.63 | -2.74 | -2.14 | -2.28 | -2.25 | -2.64 | -2.03 | -1.72 | -2.40 | -2.18 | -1.18 | -0.96 |
| BMA0792  | hypothetical protein                                               | -2.72 | -1.30 | -3.58 | NaN   | -1.33 | -1.02 | NaN   | -0.08 | NaN   | NaN   | NaN   | NaN   |
| BMA2629  | ribosomal protein L2                                               | -2.17 | -2.70 | -0.54 | -2.76 | -2.63 | -2.79 | -2.66 | -2.94 | -2.31 | -2.72 | -1.11 | -0.98 |
| BMA2066  | antioxidant, AhpC/Tsa family                                       | -4.98 | -4.45 | -3.88 | -4.95 | -4.35 | -4.01 | -3.76 | -3.50 | -5.06 | -4.77 | -1.06 | -0.98 |
| BMA2380  | cytochrome b561, putative                                          | -1.27 | -0.47 | NaN   | -0.57 | -0.83 | -1.25 | -1.03 | -0.35 | NaN   | -1.13 | -1.07 | -0.95 |
| BMA1819  | NADH dehydrogenase I, K subunit                                    | -3.31 | -3.40 | NaN   | -1.74 | -3.59 | -3.62 | -2.68 | -2.27 | NaN   | -1.85 | -1.07 | NaN   |
| BMAA0292 | tautomerase enzyme family protein                                  | NaN   | -1.47 | NaN   | -1.65 | NaN   | -1.32 | -0.45 | -0.46 | NaN   | NaN   | -1.07 | -0.96 |
| BMA1602  | NLP/P60 family protein                                             | -1.97 | -2.51 | -2.14 | -2.15 | -2.56 | -3.01 | -2.05 | -2.04 | -3.53 | -2.89 | -0.94 | -0.88 |
| BMA1340  | hfq protein                                                        | -3.41 | -1.31 | -2.45 | -2.37 | -3.55 | -2.73 | -1.79 | -1.08 | -2.25 | -2.47 | -0.97 | -0.83 |
| BMA1847  | acetolactate synthase, small subunit                               | -2.31 | -2.38 | -1.34 | -2.58 | -2.04 | -1.97 | -1.75 | -1.16 | -2.98 | -2.21 | -0.99 | -0.86 |
| BMA2280  | ATP-dependent Clp protease adaptor protein ClpS                    | -2.79 | -2.34 | -2.44 | -2.67 | -2.51 | -2.05 | -1.94 | -1.59 | -2.45 | -2.11 | -1.01 | -0.90 |
| BMAA1490 | beta-ketoadipyl CoA thiolase                                       | -1.43 | -1.47 | NaN   | -1.42 | -0.30 | -0.75 | -0.93 | -0.97 | NaN   | -0.61 | -1.02 | -0.88 |
| BMA2642  | ribosomal protein L7/L12                                           | -1.32 | -1.87 | -0.09 | -2.33 | -2.50 | -2.97 | -2.47 | -2.55 | -2.51 | -2.15 | -1.15 | -0.67 |
| BMAA1744 | citrate synthase I                                                 | -2.19 | -3.37 | -1.99 | -2.52 | -3.30 | -3.69 | -2.05 | -2.59 | -2.67 | -2.43 | -1.15 | -0.76 |
| BMA3342  | alkylphosphonate utilization operon protein PhnA, putative         | -1.47 | -1.92 | -0.75 | -1.40 | -1.28 | -1.42 | -0.78 | -1.12 | -0.86 | -1.18 | -0.59 | -0.78 |
| BMA0926  | UTP-glucose-1-phosphate uridylyltransferase                        | -3.01 | -3.18 | -2.82 | -2.80 | -2.89 | -2.56 | -2.40 | -2.02 | -3.41 | -2.70 | -0.66 | -0.80 |
| BMA1300  | putrescine ABC transporter, ATP-binding protein                    | -1.44 | -1.50 | -1.62 | -1.43 | -1.68 | -2.31 | -1.69 | -1.70 | -2.17 | -2.11 | -0.70 | -0.82 |
| BMA2442  | adenylosuccinate lyase                                             | -2.08 | -2.48 | -0.85 | -1.97 | -1.88 | -2.47 | -1.43 | -1.48 | -1.69 | -1.85 | -0.69 | -0.80 |
| BMA3370  | LemA family protein                                                | -2.48 | -2.44 | -2.90 | NaN   | -1.95 | -2.27 | -0.72 | -0.98 | NaN   | -0.31 | -0.67 | -0.76 |
| BMA2604  | ribosomal protein L17                                              | -2.19 | -2.81 | -0.46 | -2.19 | -3.72 | -3.58 | -2.72 | -2.04 | -2.81 | -2.36 | -0.75 | -0.84 |
| BMA2619  | ribosomal protein S14                                              | -3.85 | -3.72 | NaN   | -3.33 | -3.92 | -4.20 | -3.01 | -2.87 | -3.87 | -3.48 | -0.70 | -0.88 |
| BMA3213  | PTS system, fructose-specific IIA component                        | -1.95 | -2.16 | -1.04 | -2.33 | -1.52 | -1.96 | -1.79 | -1.68 | -1.42 | -1.80 | -0.76 | -0.96 |
| BMA1656  | cysteinyl-tRNA synthetase                                          | -3.25 | -2.10 | -2.18 | -2.86 | -2.52 | -2.16 | -2.07 | -1.36 | -2.67 | -2.27 | -0.80 | -0.91 |
| BMA1301  | putrescine ABC transporter, periplasmic putrescine-binding protein | -1.58 | -1.34 | -1.24 | -1.88 | -2.55 | -2.58 | -1.45 | -1.73 | -3.42 | -3.34 | -0.85 | -0.91 |
| BMA1402  | ribosomal protein S18                                              | -3.46 | -3.23 | -1.19 | -2.90 | -3.63 | -3.29 | -2.37 | -1.93 | -4.14 | -3.10 | -0.86 | -0.92 |
| BMA0625  | conserved hypothetical protein                                     | -1.27 | -1.60 | -0.88 | NaN   | -1.97 | -2.48 | -0.25 | -0.42 | NaN   | 0.09  | -0.86 | -0.90 |
| BMA2958  | ATP synthase F1, epsilon subunit                                   | -1.86 | -1.96 | -0.25 | -2.26 | -3.14 | -3.17 | -2.28 | -2.46 | -2.05 | -2.48 | -0.84 | -0.90 |
| BMAA1462 | transcriptional regulator, GntR family                             | -1.40 | -1.18 | -1.84 | -2.24 | -1.52 | -1.42 | -1.36 | -1.16 | -1.19 | -0.97 | -0.87 | -0.88 |
| BMA0536  | RNA polymerase sigma-H factor                                      | -2.75 | -2.25 | -2.44 | -2.26 | -2.32 | -2.11 | -1.66 | -1.54 | -2.40 | -2.51 | -0.93 | -0.77 |
| BMA1883  | uracil phosphoribosyltransferase                                   | -1.92 | -1.58 | -2.79 | -1.58 | -1.92 | -2.20 | -0.97 | -0.38 | -1.65 | -1.65 | -0.88 | -0.73 |
| BMA0672  | cytosol aminopeptidase                                             | -1.08 | -0.63 | NaN   | -1.40 | -1.64 | -1.51 | -0.63 | -0.65 | -0.29 | -1.57 | -0.78 | -0.75 |
| BMA1721  | pyruvate dehydrogenase, E1 component                               | -3.30 | -2.75 | -1.18 | -1.64 | -2.27 | -2.11 | -1.21 | -1.25 | -2.02 | -2.16 | -0.80 | -0.72 |

|          |                                                                                    |       |       |       |       |       |       |       |       |       |       |       |       |
|----------|------------------------------------------------------------------------------------|-------|-------|-------|-------|-------|-------|-------|-------|-------|-------|-------|-------|
| BMA2606  | dna-directed rna polymerase alpha chain                                            | -1.63 | -2.70 | -0.84 | -2.19 | -2.80 | -3.32 | -2.10 | -3.11 | -2.69 | -2.40 | -0.81 | -0.73 |
| BMA2382  | Ycel-like family protein                                                           | -3.03 | -2.56 | -2.64 | -3.01 | -4.00 | -3.75 | -2.67 | -2.03 | -3.78 | -3.14 | -0.85 | -0.75 |
| BMA2955  | ATP synthase F1, alpha subunit                                                     | -1.08 | -2.06 | -0.48 | -1.44 | -1.81 | -2.18 | -2.70 | -2.66 | -2.20 | -1.15 | -0.83 | -0.78 |
| BMA3090  | thiamine biosynthesis protein ThiC                                                 | -1.34 | -1.25 | -1.27 | -1.48 | -1.83 | -2.13 | -0.98 | -1.08 | -2.32 | -2.16 | -0.82 | -0.82 |
| BMA3252  | response regulator                                                                 | -2.04 | -1.87 | -2.36 | -1.93 | -1.48 | -1.72 | -1.31 | -1.19 | -1.11 | -1.17 | -0.79 | -0.63 |
| BMA0467  | 5-methyltetrahydropteroyltriglutamate--homocysteine S-methyltransferase            | NaN   | NaN   | NaN   | NaN   | NaN   | -0.51 | -1.90 | -2.23 | -4.65 | -4.16 | -0.81 | -0.61 |
| BMAA0303 | organic hydroperoxide resistance protein                                           | -0.84 | -1.02 | -0.06 | -3.16 | -0.97 | -1.11 | -0.91 | -1.18 | -0.71 | -1.30 | -0.82 | -0.63 |
| BMA1433  | conserved hypothetical protein                                                     | -2.07 | -1.59 | -1.65 | -2.38 | -2.35 | -2.34 | -0.98 | -0.70 | -1.81 | -1.76 | -0.69 | -0.68 |
| BMA0435  | DNA gyrase, A subunit                                                              | -2.66 | -2.83 | -0.98 | -2.22 | -2.22 | -2.53 | -2.08 | -1.98 | -2.15 | -1.70 | -0.75 | -0.70 |
| BMA3263  | hypothetical protein                                                               | -2.24 | -2.17 | -1.90 | -0.43 | -1.34 | -1.66 | -0.40 | -0.65 | NaN   | -0.93 | -0.73 | -0.68 |
| BMA0486  | isocitrate dehydrogenase, NADP-dependent                                           | -2.79 | -2.02 | -2.83 | -2.95 | -3.26 | -2.45 | -2.19 | -1.84 | -3.77 | -2.91 | -0.75 | -0.58 |
| BMA2271  | superoxide dismutase                                                               | -2.96 | -2.86 | -3.47 | -2.41 | -2.98 | -2.65 | -2.14 | -3.12 | -2.15 | -0.68 | -0.60 | -0.60 |
| BMA3255  | DnaK suppressor protein                                                            | -3.73 | -3.47 | -3.53 | -3.90 | -3.60 | -3.77 | -2.43 | -1.84 | -3.11 | -3.41 | -0.70 | -0.60 |
| BMA2544  | AhpC/TSA family protein                                                            | -1.73 | -2.04 | -2.25 | -2.19 | -2.34 | -2.31 | -1.11 | -1.19 | -1.81 | -1.58 | -0.64 | -0.63 |
| BMAA0660 | amino acid ABC transporter, periplasmic amino acid-binding protein, putative       | -1.70 | -1.56 | -2.60 | -1.96 | -1.92 | -2.17 | -1.16 | -1.06 | -1.44 | -1.75 | -0.63 | -0.59 |
| BMAA1794 | acetyl-coenzyme A synthetase                                                       | -3.19 | -2.76 | -2.98 | -2.87 | -1.71 | -2.17 | -1.44 | -1.36 | NaN   | -2.45 | -0.62 | NaN   |
| BMA3205  | protein-export protein SecB                                                        | -3.03 | -2.74 | -2.18 | -2.83 | -3.26 | -3.30 | -1.88 | -2.22 | -2.37 | -2.23 | -0.77 | -0.50 |
| BMA2632  | ribosomal protein L3                                                               | -2.73 | -2.10 | -0.51 | -2.00 | -2.69 | -2.66 | -2.55 | -2.94 | -2.72 | -2.23 | -0.73 | -0.42 |
| BMAA0318 | decarboxylase family protein                                                       | -1.50 | -1.99 | -1.37 | -1.74 | -1.62 | -2.28 | -1.57 | -1.70 | -1.61 | -1.45 | -0.70 | -0.40 |
| BMA0550  | translation elongation factor P                                                    | -3.45 | -2.98 | -1.79 | -1.87 | -2.30 | -3.19 | -2.04 | -1.46 | -1.34 | -1.37 | -0.52 | -0.23 |
| BMA2791  | cold-shock domain family protein                                                   | -2.65 | -2.94 | -2.44 | -3.32 | -2.95 | -3.45 | -2.86 | -0.59 | -3.42 | -3.45 | -0.53 | -0.21 |
| BMA0469  | fructose-1,6-bisphosphatase                                                        | -2.66 | -2.51 | -2.43 | -2.00 | -1.97 | -2.06 | -1.07 | -0.92 | -1.47 | -1.44 | -0.48 | -0.34 |
| BMA1328  | lipoprotein, putative                                                              | -2.63 | -2.46 | -2.24 | -2.28 | -1.95 | -1.93 | -1.65 | -1.22 | -2.61 | -2.41 | -0.42 | -0.33 |
| BMA3211  | phosphoenolpyruvate-protein phosphotransferase                                     | -2.83 | -2.54 | -2.41 | -3.00 | -2.48 | -2.53 | -2.15 | -2.23 | -2.10 | -1.84 | -0.42 | -0.35 |
| BMA1263  | ribonuclease R                                                                     | -2.46 | -2.42 | -2.18 | -2.13 | -1.52 | -1.82 | -1.35 | -1.99 | -1.08 | -1.30 | -0.45 | -0.28 |
| BMA2545  | cell division protein FtsZ                                                         | -2.72 | -2.52 | -3.22 | -2.79 | -2.87 | -2.91 | -1.81 | -1.62 | -2.08 | -1.52 | -0.42 | -0.26 |
| BMA0275  | succinyl-CoA synthase, beta subunit                                                | -1.96 | -1.79 | -1.88 | -1.67 | -2.16 | -2.36 | -2.34 | -1.50 | -1.90 | -1.42 | -0.39 | -0.20 |
| BMA3210  | HesA/MoeB/ThiF family protein                                                      | -1.71 | -1.42 | NaN   | -1.01 | -0.85 | -1.40 | -1.37 | -1.47 | NaN   | NaN   | -0.39 | NaN   |
| BMA0904  | conserved hypothetical protein                                                     | -1.31 | -0.92 | -1.12 | -1.50 | -1.46 | -1.16 | -0.63 | -0.30 | -1.48 | -1.39 | -0.36 | -0.30 |
| BMA2457  | outer membrane lipoprotein, putative                                               | -2.15 | -2.34 | -1.59 | -2.21 | -2.69 | -3.11 | -1.59 | -1.60 | -1.88 | -2.59 | -0.38 | -0.28 |
| BMA3400  | ribosomal protein L34                                                              | -1.75 | -1.88 | NaN   | -1.17 | -1.83 | -1.80 | -0.80 | -0.89 | -1.16 | -1.63 | -0.36 | -0.25 |
| BMA1745  | molybdopterin-binding protein                                                      | -2.18 | -1.24 | NaN   | -1.67 | -1.45 | -2.07 | -0.97 | -1.15 | -1.79 | -1.85 | -0.55 | -0.35 |
| BMA0770  | carbamoyl-phosphate synthase, small subunit                                        | -2.56 | -3.20 | -0.72 | -0.57 | -1.05 | -1.72 | 0.03  | -0.31 | -0.27 | -0.47 | -0.55 | -0.32 |
| BMAA0525 | thiol:disulfide interchange protein DsbC, putative                                 | -1.79 | -1.55 | -1.71 | -1.73 | -1.95 | -2.33 | -1.22 | -1.50 | -2.48 | -2.13 | -0.55 | -0.31 |
| BMA0771  | homoserine/threonine efflux protein, putative                                      | -1.78 | -1.82 | -0.44 | -0.36 | -0.54 | -0.95 | -0.28 | -0.19 | NaN   | 0.22  | -0.54 | -0.40 |
| BMAA0537 | hypothetical protein                                                               | -2.04 | -1.67 | NaN   | -1.62 | -1.64 | -1.79 | -1.02 | -0.68 | NaN   | -1.79 | -0.57 | -0.40 |
| BMA2417  | flavohemoprotein                                                                   | -3.91 | -3.34 | -2.51 | -0.69 | -2.61 | -2.73 | -1.44 | -1.19 | -0.25 | -0.81 | -0.53 | -0.51 |
| BMA2840  | 5,10-methylenetetrahydrofolate reductase                                           | -1.93 | -1.66 | NaN   | NaN   | -1.44 | -1.93 | -0.62 | -0.71 | -2.03 | -2.62 | -0.56 | -0.53 |
| BMA0623  | peptidase, U32 family                                                              | -3.39 | -3.26 | -2.71 | -0.17 | -3.41 | -3.78 | -0.13 | -0.78 | -0.17 | NaN   | -0.41 | -0.52 |
| BMAA0365 | H-NS histone family protein                                                        | -2.86 | -2.24 | -2.95 | -3.07 | -3.02 | -3.11 | -2.32 | -1.60 | -2.52 | -2.50 | -0.38 | -0.48 |
| BMA0084  | arginyl-tRNA synthetase                                                            | -1.39 | -2.00 | -1.97 | -1.43 | -1.36 | -1.59 | -1.55 | -1.23 | -1.96 | -1.40 | -0.47 | -0.51 |
| BMA1777  | iron compound ABC transporter, periplasmic iron-compound-binding protein, putative | NaN   | NaN   | NaN   | NaN   | -0.88 | -1.63 | -0.85 | -0.90 | -1.69 | -1.65 | NaN   | NaN   |
| BMAA0256 | conserved hypothetical protein                                                     | -2.31 | -2.26 | -2.46 | -1.20 | -1.23 | -1.00 | -0.86 | -0.77 | -1.48 | -0.86 | -0.47 | -0.46 |
| BMAA0996 | gamma-glutamyltranspeptidase                                                       | -3.05 | -2.40 | -4.11 | -3.40 | -2.56 | -2.18 | -2.58 | -1.85 | -3.46 | -2.79 | -0.46 | -0.42 |
| BMA2277  | adenylate kinase                                                                   | -2.45 | -2.25 | -1.99 | -2.86 | -2.58 | -2.75 | -1.85 | -1.63 | -2.15 | -1.99 | -0.32 | -0.42 |
| BMAA1797 | hydro-lyase, Fe-S type, tartrate/fumarate family                                   | -2.06 | -2.26 | -1.62 | -1.76 | -2.18 | -2.75 | -1.11 | -0.85 | NaN   | -0.21 | -0.39 | -0.41 |
| BMA1749  | conserved hypothetical protein                                                     | -2.01 | -1.86 | -0.91 | -0.94 | -1.89 | -2.44 | -0.53 | -0.69 | -0.67 | -1.05 | -0.19 | -0.66 |
| BMA1752  | conserved hypothetical protein                                                     | -1.29 | -1.42 | -1.05 | -1.75 | -1.65 | -1.63 | -1.14 | -0.34 | -1.77 | -1.62 | -0.12 | -0.65 |
| BMA0541  | GTP-binding protein LepA                                                           | -0.48 | -1.77 | -0.07 | -1.97 | -1.33 | -2.03 | -0.81 | -1.39 | -2.04 | -0.59 | -0.17 | -0.55 |

|          |                                                                                          |       |       |       |       |       |       |       |       |       |       |       |       |
|----------|------------------------------------------------------------------------------------------|-------|-------|-------|-------|-------|-------|-------|-------|-------|-------|-------|-------|
| BMA0741  | glutamine dependent NAD <sup>+</sup> synthetase                                          | -1.73 | -1.76 | -0.87 | -1.18 | -1.09 | -1.59 | -0.68 | -0.56 | -1.49 | -1.61 | -0.13 | -0.51 |
| BMA0333  | maltose/mannitol ABC transporter, periplasmic maltose/mannitol-binding protein, putative | NaN   | NaN   | -2.72 | -2.63 | -1.59 | -1.87 | -1.82 | -1.67 | -2.00 | -2.02 | -0.08 | NaN   |
| BMA2068  | conserved hypothetical protein                                                           | -1.57 | -1.90 | -0.67 | -1.40 | -0.85 | -1.38 | -0.66 | -0.76 | -1.41 | -1.62 | -0.09 | -0.50 |
| BMA1554  | translation elongation factor Ts                                                         | -3.86 | -3.24 | -1.80 | -1.68 | -2.69 | -2.58 | -1.89 | -1.57 | -2.28 | -1.96 | -0.32 | -0.71 |
| BMAA0237 | hypothetical protein                                                                     | -1.53 | -0.99 | NaN   | -0.90 | -1.09 | -0.76 | -0.97 | -0.86 | -1.29 | -1.25 | -0.26 | -0.71 |
| BMA1426  | lipoprotein, putative                                                                    | -2.06 | -1.41 | -1.45 | -1.80 | -1.78 | -0.97 | -1.45 | -0.67 | -1.82 | -1.16 | -0.29 | -0.57 |
| BMA0366  | conserved hypothetical protein TIGR00150                                                 | -2.06 | -2.13 | NaN   | -1.86 | -1.56 | -1.98 | -0.99 | -0.99 | -1.29 | -1.81 | -0.31 | -0.53 |
| BMA3212  | phosphocarrier protein HPr                                                               | -1.46 | -1.06 | -1.47 | -1.39 | -1.52 | -1.38 | -1.11 | -0.99 | -1.62 | -1.34 | -0.31 | -0.49 |
| BMA2717  | BolA/YrbA family protein                                                                 | NaN   | NaN   | NaN   | -1.46 | -1.76 | -2.18 | -1.12 | -0.96 | NaN   | -1.38 | -0.28 | -0.48 |
| BMA2058  | conserved hypothetical protein                                                           | -0.07 | NaN   | NaN   | -1.80 | -0.18 | -0.30 | -1.08 | -0.32 | NaN   | 0.08  | -0.27 | NaN   |
| BMAA0162 | hypothetical protein                                                                     | -1.75 | -1.40 | -2.47 | NaN   | -1.18 | -1.48 | -0.60 | -0.49 | NaN   | -0.32 | -0.26 | -0.46 |
| BMA2095  | DNA-directed RNA polymerase, omega subunit                                               | -4.40 | -3.86 | -2.71 | -3.77 | -3.33 | -2.98 | -2.37 | -1.55 | -2.91 | -2.92 | -0.38 | -0.60 |
| BMA1912  | ABC transporter, permease/ATP-binding protein                                            | -2.02 | -1.19 | -1.52 | -2.17 | -3.22 | -2.80 | -2.03 | -0.82 | -2.56 | -1.36 | -0.36 | -0.58 |
| BMA0429  | cytidylate kinase                                                                        | NaN   | -0.66 | NaN   | NaN   | -0.78 | -1.63 | -1.12 | -1.00 | NaN   | NaN   | -0.37 | NaN   |
| BMA2628  | ribosomal protein S19                                                                    | -4.54 | -4.30 | -1.16 | -3.73 | -4.76 | -4.15 | -3.29 | -3.10 | -4.25 | -3.70 | -0.37 | -0.57 |
| BMA0890  | hypothetical protein                                                                     | -2.44 | -1.95 | -2.49 | -2.37 | -3.08 | -2.62 | -1.92 | -1.27 | -2.60 | -1.88 | -0.38 | -0.66 |
| BMAA1370 | oxidoreductase, aldo/keto reductase family                                               | -1.38 | -0.86 | -1.74 | -1.41 | -0.65 | -0.83 | -0.66 | -0.53 | -1.40 | -1.52 | -0.41 | -0.63 |
| BMA3207  | rhodanese-like domain protein                                                            | -4.15 | -3.03 | -4.11 | -3.25 | -4.75 | -3.80 | -3.36 | -1.81 | -4.30 | -2.85 | -0.54 | -0.66 |
| BMA3251  | sensor histidine kinase                                                                  | -2.71 | -2.26 | -2.38 | -2.28 | -1.90 | -2.00 | -0.98 | -1.00 | NaN   | -1.21 | -0.47 | -0.70 |
| BMA2440  | transcriptional regulator, LysR family                                                   | -3.97 | -3.56 | -3.34 | -3.29 | -4.02 | -3.85 | -2.69 | -2.47 | -3.47 | -3.11 | -0.48 | -0.72 |
| BMA2623  | ribosomal protein S17                                                                    | -5.58 | -5.16 | NaN   | -4.62 | -5.48 | -5.40 | -3.95 | -3.54 | -4.72 | -4.03 | -0.49 | -0.74 |
| BMAA0329 | geranyltranstransferase                                                                  | -2.35 | -2.18 | -1.45 | -2.42 | -2.39 | -2.35 | -1.61 | -1.35 | -1.98 | -2.02 | -0.51 | -0.73 |
| BMAA0719 | DNA-binding protein                                                                      | -3.32 | -2.84 | -2.41 | -3.67 | -1.92 | -2.63 | -1.65 | -1.54 | -2.85 | -2.87 | -0.41 | -0.72 |
| BMA2913  | DNA-binding protein HU, form B                                                           | -2.79 | -3.25 | -2.64 | -3.13 | -3.01 | -3.38 | -3.77 | -2.74 | -4.15 | -1.76 | -0.42 | -0.80 |
| BMA2612  | preprotein translocase, SecY subunit                                                     | -2.34 | -2.15 | 0.02  | -2.28 | -2.73 | -2.95 | -2.66 | -2.73 | -2.99 | -2.63 | -0.44 | -0.85 |
| BMAA2110 | NADPH-dependent FMN reductase domain protein                                             | -1.20 | -1.59 | -2.15 | -2.16 | -1.55 | -1.70 | -1.36 | -1.46 | -2.06 | -1.40 | -0.48 | -0.88 |
| BMA0715  | Orn/Lys/Arg decarboxylase                                                                | -1.33 | -1.23 | NaN   | -1.00 | -1.97 | -2.21 | -0.79 | -0.89 | -1.50 | -0.84 | -1.47 | -1.06 |
| BMA1021  | type-1 fimbrial protein, authentic frameshift                                            | -2.63 | -2.10 | -1.04 | -2.08 | -2.44 | -3.05 | -2.13 | -2.35 | -2.38 | -2.71 | -1.66 | -1.46 |
| BMA1435  | hypothetical protein                                                                     | -0.36 | -0.47 | -0.37 | -1.53 | -0.29 | -0.38 | -0.81 | -0.92 | -2.32 | -1.63 | -1.62 | -1.43 |
| BMA1094  | ribosomal protein L35                                                                    | -3.45 | -3.64 | -2.79 | -3.26 | -3.69 | -3.74 | -3.02 | -2.76 | -3.68 | -3.31 | -1.53 | -1.53 |
| BMA0714  | deoxycytidine triphosphate deaminase, putative                                           | -2.20 | -1.70 | NaN   | -1.94 | -2.67 | -3.05 | -1.42 | -1.69 | -1.88 | -2.72 | -1.54 | -1.57 |
| BMAA0195 | ubiquinol oxidase, subunit I                                                             | -1.85 | -0.58 | NaN   | NaN   | -1.73 | -2.43 | -1.21 | -1.40 | NaN   | NaN   | -1.57 | -1.56 |
| BMA1743  | glutamine synthetase, type I                                                             | -1.39 | -1.96 | -1.49 | -2.52 | -2.82 | -3.14 | -1.80 | -1.85 | -2.24 | -1.80 | -1.49 | -1.67 |
| BMAA0773 | transcriptional regulator, TetR family, putative                                         | -2.62 | -2.41 | -2.58 | -2.51 | -2.37 | -2.55 | -1.50 | -1.30 | -2.38 | -2.65 | -1.54 | -1.64 |
| BMA1395  | antioxidant, AhpC/Tsa family                                                             | -1.77 | -1.61 | -1.25 | -1.58 | -2.21 | -2.08 | -0.95 | -0.73 | -1.96 | -1.78 | -1.46 | -1.61 |
| BMA2953  | ATP synthase F0, B subunit                                                               | -2.82 | -2.77 | -1.90 | -2.66 | -3.73 | -3.28 | -3.09 | -2.56 | -3.69 | -2.97 | -1.44 | -1.66 |
| BMA2842  | adenosylhomocysteinase                                                                   | -1.63 | -2.42 | -1.43 | -2.24 | -2.17 | -2.26 | -2.23 | -2.31 | -1.58 | -0.96 | -1.40 | -1.66 |
| BMAA1515 | hypothetical protein                                                                     | -0.71 | -0.98 | -0.02 | -0.87 | -0.03 | -1.18 | -1.45 | -1.58 | -1.64 | -1.60 | -1.42 | -1.64 |
| BMA2423  | conserved hypothetical protein                                                           | -2.50 | -2.13 | -2.57 | -2.42 | -1.91 | -2.09 | -1.55 | -1.43 | -1.77 | -1.62 | -1.37 | -1.70 |
| BMA1037  | hypothetical protein                                                                     | NaN   | -0.54 | NaN   | NaN   | NaN   | -0.57 | -1.48 | -1.05 | NaN   | -0.80 | -1.34 | -1.70 |
| BMA2637  | ribosomal protein S12                                                                    | -3.66 | -3.37 | -2.07 | -2.83 | -3.57 | -3.34 | -2.64 | -2.57 | -3.81 | -2.99 | -1.34 | -1.72 |
| BMAA0234 | hypothetical protein                                                                     | -3.13 | -2.56 | NaN   | -3.34 | -2.71 | -3.00 | -1.87 | -1.81 | -1.98 | -2.85 | -1.31 | -1.60 |
| BMA1999  | rubredoxin                                                                               | -2.52 | -1.05 | -1.82 | -1.31 | -2.00 | -1.51 | -0.67 | -0.69 | -2.03 | -1.92 | -1.37 | -1.56 |
| BMA0528  | ribosomal protein L32                                                                    | -4.31 | -3.82 | -2.76 | -2.98 | -3.32 | -3.42 | -2.46 | -2.17 | -2.95 | -2.84 | -1.38 | -1.60 |
| BMAA1575 | hypothetical protein                                                                     | NaN   | -1.19 | -1.65 | -1.47 | NaN   | -0.55 | -0.50 | -0.57 | NaN   | -1.46 | -1.41 | -1.57 |
| BMA2202  | translation initiation factor IF-1                                                       | -0.15 | NaN   | NaN   | -0.09 | 0.09  | -0.88 | -0.91 | -1.40 | NaN   | NaN   | -1.49 | -1.26 |
| BMAA1723 | tRNA pseudouridine synthase A                                                            | -0.90 | -1.06 | NaN   | -1.44 | -0.67 | -1.57 | -0.46 | -0.32 | -0.38 | -1.06 | -1.38 | -1.24 |
| BMA2524  | octaprenyl-diphosphate synthase                                                          | -2.29 | -2.43 | -2.12 | -2.19 | -2.47 | -2.48 | -1.63 | -2.13 | -1.77 | -1.89 | -1.30 | -1.30 |
| BMA3113  | ATP-dependent protease La domain protein                                                 | -2.60 | -2.07 | -2.99 | -2.92 | -3.03 | -3.06 | -2.39 | -1.45 | -2.64 | -1.27 | -1.26 | -1.22 |

|          |                                                        |       |       |       |       |       |       |       |       |       |       |       |       |
|----------|--------------------------------------------------------|-------|-------|-------|-------|-------|-------|-------|-------|-------|-------|-------|-------|
| BMAA0064 | conserved hypothetical protein                         | NaN   | -0.98 | NaN   | NaN   | NaN   | -0.73 | -2.23 | -2.20 | NaN   | -1.62 | -1.27 | -1.24 |
| BMA0213  | lactoylglutathione lyase                               | -2.41 | -2.50 | -2.77 | -3.13 | -3.61 | -3.33 | -2.75 | -1.51 | -3.45 | -2.13 | -1.32 | -1.26 |
| BMAA1141 | homoprotocatechuate degradative operon repressor       | NaN   | NaN   | NaN   | -2.59 | NaN   | -1.16 | -1.26 | -0.99 | NaN   | -1.61 | NaN   | NaN   |
| BMA0221  | magnesium and cobalt efflux protein CorC               | -2.31 | -2.55 | -1.85 | -2.15 | -2.08 | -2.31 | -1.17 | -0.71 | -2.39 | -2.10 | -1.32 | -1.17 |
| BMAA1838 | conserved hypothetical protein                         | NaN   | -0.72 | NaN   | NaN   | NaN   | -1.08 | -0.91 | -0.78 | NaN   | -1.72 | NaN   | NaN   |
| BMA1786  | conserved hypothetical protein                         | -3.27 | -1.61 | -2.12 | -2.96 | -3.58 | -3.07 | -2.93 | -2.84 | -3.70 | -3.19 | -1.40 | -1.48 |
| BMA3009  | lipoprotein, putative                                  | -0.77 | -0.82 | NaN   | -2.18 | -1.54 | -1.78 | -1.48 | -1.15 | NaN   | NaN   | -1.39 | -1.43 |
| BMA0797  | conserved hypothetical protein                         | -1.95 | -1.96 | -2.48 | -1.57 | -1.25 | -1.64 | -0.56 | -0.76 | -1.24 | -1.48 | -1.48 | -1.36 |
| BMA1259  | transcriptional regulator, GntR family                 | -2.22 | -2.02 | -1.31 | -2.77 | -2.94 | -2.94 | -2.04 | -1.70 | NaN   | -2.12 | -1.54 | -1.36 |
| BMA2453  | leucyl-tRNA synthetase                                 | -2.31 | -2.25 | -0.38 | -1.77 | -2.02 | -2.40 | -1.31 | -0.84 | -1.84 | -1.90 | -1.52 | -1.38 |
| BMA2634  | translation elongation factor Tu                       | -3.23 | -2.57 | -3.68 | -3.81 | -2.86 | -4.68 | -3.84 | -2.84 | -3.87 | -3.03 | -1.47 | -1.43 |
| BMA3333  | flagellar protein FlgJ                                 | -1.81 | -1.01 | -1.93 | -0.68 | -1.51 | -1.08 | -0.98 | -0.67 | -2.00 | -1.25 | -1.48 | -1.43 |
| BMAA1781 | conserved hypothetical protein                         | -1.81 | -1.43 | -2.65 | -1.41 | -2.25 | -1.19 | -1.75 | -1.57 | -2.01 | -1.36 | -1.44 | -1.41 |
| BMA0527  | conserved hypothetical protein                         | -2.65 | -2.16 | NaN   | -1.99 | -1.84 | -2.50 | -1.75 | -1.38 | -2.04 | -1.79 | -1.21 | -1.42 |
| BMA1767  | peptidyl-tRNA hydrolase, putative                      | -1.76 | -0.83 | NaN   | -2.21 | -1.95 | -1.33 | -0.69 | -0.58 | -1.71 | -1.44 | -1.26 | -1.41 |
| BMA2643  | ribosomal protein L10                                  | -4.27 | -3.43 | -2.29 | -3.68 | -4.29 | -4.27 | -3.89 | -3.48 | -4.24 | -3.54 | -1.27 | -1.48 |
| BMA0752  | hypothetical protein                                   | -3.52 | -2.78 | -2.89 | -3.02 | -2.95 | -2.98 | -1.58 | -1.60 | -2.77 | -1.51 | -1.28 | -1.50 |
| BMA3341  | hypothetical protein                                   | NaN   | -0.88 | NaN   | NaN   | -1.13 | -0.71 | -0.80 | -1.06 | NaN   | -1.66 | -1.28 | -1.49 |
| BMAA1963 | radical SAM domain protein                             | -1.41 | -1.75 | -0.40 | -2.13 | -2.08 | -2.40 | -1.28 | -1.11 | -2.16 | -1.91 | -1.32 | -1.38 |
| BMA3109  | ribosomal subunit interface protein                    | -5.26 | -5.31 | -3.40 | -5.41 | -5.78 | -5.47 | -3.83 | -3.00 | -5.61 | -4.75 | -1.22 | -1.94 |
| BMA0433  | phosphoserine aminotransferase                         | -2.58 | -2.08 | NaN   | -2.40 | -2.22 | -1.70 | -1.41 | -1.68 | -2.28 | -1.70 | -1.32 | -1.87 |
| BMA1726  | oligopeptidase A                                       | -3.05 | -2.72 | -2.38 | -2.06 | -2.27 | -2.44 | -1.79 | -2.01 | -2.22 | -1.65 | -1.36 | -1.84 |
| BMA2620  | ribosomal protein L5                                   | -3.44 | -3.22 | -0.93 | -3.38 | -3.99 | -4.35 | -3.62 | -3.87 | -4.32 | -3.64 | -1.26 | -1.75 |
| BMA1988  | dTDP-4-dehydrorhamnose 3,5-epimerase                   | -2.46 | -2.04 | -1.16 | -2.98 | -3.02 | -2.82 | -2.98 | -2.29 | -2.84 | -2.68 | -1.29 | -1.76 |
| BMA3138  | RNA polymerase sigma-32 factor                         | -3.61 | -3.49 | -3.85 | -2.69 | -2.27 | -2.30 | -1.90 | -2.09 | -2.83 | -2.25 | -1.31 | -1.75 |
| BMAA0871 | hypothetical protein                                   | -5.48 | -4.77 | -5.26 | -3.04 | -5.05 | -3.96 | -2.82 | -2.09 | -3.55 | -3.72 | -1.21 | -1.80 |
| BMA1981  | O-antigen methyl transferase, putative                 | -1.27 | -0.97 | -0.61 | -2.36 | -2.64 | -2.43 | -2.16 | -1.84 | -2.59 | -1.53 | -1.46 | -2.13 |
| BMA1813  | conserved hypothetical protein                         | -1.42 | -1.54 | -1.46 | -2.29 | -1.59 | -1.88 | -1.43 | -1.71 | -1.50 | -1.50 | -1.51 | -2.07 |
| BMA2635  | translation elongation factor G                        | -3.72 | -3.06 | -2.22 | -3.59 | -4.04 | -3.48 | -3.39 | -3.29 | -4.43 | -3.40 | -1.45 | -2.04 |
| BMA2705  | membrane protein, putative                             | -2.26 | -1.83 | -1.62 | -2.59 | -3.31 | -3.28 | -2.27 | -1.68 | -2.92 | -2.62 | -1.45 | -2.05 |
| BMA2231  | ribosomal protein L28                                  | -4.11 | -3.97 | -2.37 | -3.13 | -4.61 | -3.90 | -3.26 | -2.55 | -4.12 | -3.05 | -1.70 | -2.24 |
| BMA0256  | conserved hypothetical protein                         | NaN   | NaN   | NaN   | -1.67 | NaN   | -1.78 | -1.04 | -0.61 | -1.22 | -1.60 | -1.68 | -2.09 |
| BMA2690  | conserved hypothetical protein                         | NaN   | -2.84 | NaN   | -3.03 | -2.13 | -2.86 | -2.44 | -2.07 | NaN   | -2.17 | -1.69 | -2.08 |
| BMA3125  | pantetheine-phosphate adenylyltransferase              | -2.19 | -1.34 | -1.70 | -2.11 | -2.75 | -2.73 | -1.11 | -1.11 | -2.70 | -2.37 | -1.68 | -2.01 |
| BMA2625  | ribosomal protein L16                                  | -3.69 | -3.87 | -1.87 | -2.94 | -4.19 | -3.61 | -2.87 | -3.02 | -3.87 | -2.95 | -1.77 | -2.10 |
| BMA3396  | hypothetical protein                                   | -1.65 | -2.15 | -1.69 | -1.37 | -1.55 | -1.82 | -2.01 | -1.74 | -1.87 | -1.35 | -1.83 | -2.05 |
| BMA0428  | ribosomal protein S1                                   | -2.92 | -3.22 | -3.67 | -3.49 | -3.80 | -3.32 | -3.23 | -2.80 | -4.74 | -2.66 | -1.79 | -1.80 |
| BMA2075  | serine hydroxymethyltransferase                        | -3.27 | -2.87 | -2.84 | -3.56 | -4.16 | -4.22 | -2.98 | -2.82 | -4.65 | -1.06 | -1.74 | -1.80 |
| BMA0403  | ribosomal protein S16                                  | -2.80 | -3.22 | -1.72 | -2.85 | -3.64 | -3.12 | -2.00 | -1.97 | -2.93 | -2.85 | -1.78 | -1.74 |
| BMA2622  | ribosomal protein L14                                  | -3.31 | -4.48 | NaN   | -3.50 | -4.01 | -4.43 | -3.48 | -3.75 | -4.23 | -3.70 | -1.82 | -1.71 |
| BMA2341  | ribosomal protein L13                                  | -4.91 | -4.54 | -3.52 | -4.21 | -4.41 | -4.91 | -4.02 | -3.75 | -4.13 | -4.12 | -1.75 | -1.64 |
| BMA1947  | heat shock protein HtpG                                | -3.44 | -2.96 | -2.33 | -1.85 | -2.51 | -2.47 | -2.41 | -2.21 | -2.55 | -2.05 | -1.67 | -1.54 |
| BMA2298  | capsular polysaccharide biosynthesis protein, putative | -2.99 | -2.83 | -3.44 | -2.92 | -3.33 | -3.37 | -2.85 | -2.73 | -3.37 | -2.98 | -1.65 | -1.53 |
| BMA0351  | tryptophan 2,3-dioxygenase family protein              | -1.10 | -1.16 | -1.02 | -2.75 | -1.23 | -1.30 | -1.46 | -1.39 | -0.17 | -0.24 | -1.74 | -1.54 |
| BMA2005  | transcriptional regulator family protein               | -1.70 | -1.54 | NaN   | -2.12 | -1.01 | -1.52 | -1.43 | -1.66 | -1.78 | -1.41 | -1.73 | -1.53 |
| BMA3178  | cytochrome d ubiquinol oxidase, subunit I              | -3.10 | -3.55 | -2.61 | -0.57 | -3.90 | -3.85 | -2.02 | -1.59 | -0.38 | -0.56 | -1.72 | -1.56 |
| BMA3292  | ferredoxin--NADP reductase                             | -1.80 | -1.55 | -1.88 | -2.42 | -2.60 | -3.03 | -2.10 | -1.66 | -3.15 | -0.54 | -1.64 | -1.64 |
| BMA1935  | cytochrome C4 family protein, authentic frameshift     | -2.43 | -2.59 | -2.49 | -2.92 | -2.71 | -3.10 | -2.35 | -2.18 | -2.80 | -2.29 | -1.65 | -1.70 |
| BMAA0002 | phage integrase family protein                         | -2.13 | -1.22 | -1.94 | -2.78 | -2.30 | -2.60 | -2.72 | -2.36 | -0.82 | -1.20 | -1.63 | -1.73 |

|          |                                                                         |       |       |       |       |       |       |       |       |       |       |       |       |       |
|----------|-------------------------------------------------------------------------|-------|-------|-------|-------|-------|-------|-------|-------|-------|-------|-------|-------|-------|
| BMA0798  | hypothetical protein                                                    | -2.44 | -1.90 | -1.84 | -2.23 | -1.26 | -1.83 | -1.94 | -1.61 | -1.28 | -2.71 | -1.63 | -1.86 |       |
| BMA1547  | outer membrane protein, OMP85 family                                    | -3.28 | -3.16 | -2.24 | -2.94 | -3.06 | -3.48 | -2.52 | -2.48 | -3.23 | -2.49 | -1.67 | -1.84 |       |
| BMA0606  | Rrf2 family protein                                                     | -2.81 | -2.31 | -2.34 | NaN   | -1.98 | -2.00 | -0.83 | -0.67 | NaN   | -0.25 | -1.57 | -1.78 |       |
| BMA1690  | 3-deoxy-8-phosphooctulonate synthase                                    | -1.89 | -2.43 | -1.18 | -2.60 | -2.48 | -2.80 | -1.94 | -1.73 | -2.59 | -1.79 | -1.57 | -1.80 |       |
| BMAA0040 | hypothetical protein                                                    | -1.38 | -0.70 | -1.57 | -1.32 | -1.22 | -0.94 | -1.29 | -1.49 | -1.62 | -1.45 | -1.53 | -1.87 |       |
| BMA0371  | ebsC protein, putative                                                  | -2.45 | -1.95 | -0.71 | NaN   | -0.83 | -1.05 | -0.84 | -1.01 | -0.61 | -0.24 | -1.47 | -1.88 |       |
| BMA2944  | glucose-inhibited division protein A                                    | -3.02 | -1.78 | NaN   | -2.80 | -3.03 | -2.92 | -2.51 | -2.08 | -2.90 | -2.26 | -1.42 | -1.87 |       |
| BMAA0937 | transcriptional regulator, ArsR family                                  | -2.74 | -1.64 | NaN   | NaN   | NaN   | -1.20 | -1.02 | -1.08 | NaN   | NaN   | -1.46 | -1.81 |       |
| BMAA1984 | sigma-54 dependent transcriptional regulator, authentic point mutation  | -0.40 | NaN   | NaN   | NaN   | NaN   | 0.11  | -0.40 | -0.30 | NaN   | NaN   | -1.54 | -1.49 | -1.80 |
| BMA1487  | antioxidant, AhpC/Tsa family                                            | -4.08 | -4.05 | -4.00 | -4.01 | -4.40 | -4.81 | -3.37 | -3.58 | -3.99 | -3.46 | -1.94 | -1.80 |       |
| BMA1117  | transposase, IS3 family, truncation                                     | NaN   | -1.63 | NaN   | -1.87 | NaN   | -1.42 | -1.93 | -1.71 | NaN   | NaN   | -2.01 | -1.88 |       |
| BMAA0416 | hypothetical protein                                                    | -1.29 | -1.45 | -1.67 | -2.58 | -1.80 | -2.03 | -3.02 | -2.26 | -2.51 | -2.02 | -1.98 | -1.88 |       |
| BMA1818  | NADH dehydrogenase I, L subunit                                         | -1.85 | -2.01 | NaN   | -2.00 | -2.42 | -2.71 | -1.86 | -2.08 | NaN   | NaN   | -1.82 | -1.91 |       |
| BMA2321  | 2-amino-4-hydroxy-6-hydroxymethylidihydropteridine pyrophosphokinase    | -1.75 | -1.77 | -1.58 | -1.80 | -1.65 | -1.72 | -1.15 | -1.19 | -2.16 | -1.69 | -1.85 | -1.91 |       |
| BMA2649  | translation elongation factor Tu                                        | -1.96 | -3.26 | -2.61 | -2.86 | -3.61 | -4.92 | -3.34 | -3.44 | -3.22 | -2.21 | -1.86 | -1.89 |       |
| BMA1673  | peptidyl-prolyl cis-trans isomerase, FKBP-type, authentic frameshift    | -3.67 | -3.00 | -3.89 | -4.15 | -2.59 | -3.03 | -2.30 | -2.21 | -3.75 | -3.13 | -1.91 | -1.88 |       |
| BMA3124  | ferredoxin                                                              | NaN   | -1.22 | -1.50 | -1.92 | -2.21 | -2.33 | -0.99 | -1.59 | -2.99 | -2.68 | -1.88 | -1.94 |       |
| BMAA2111 | sigma-70 factor, putative                                               | -1.78 | -1.77 | -1.47 | -1.88 | -1.60 | -2.00 | -1.94 | -1.49 | -1.31 | -1.82 | -1.89 | -1.93 |       |
| BMA1099  | conserved hypothetical protein                                          | -4.22 | -2.30 | -2.55 | -3.05 | -3.67 | -3.70 | -2.66 | -2.24 | -2.17 | -3.08 | -0.50 | -1.33 |       |
| BMA1787  | transcriptional regulator, putative                                     | -2.39 | -4.88 | -1.72 | -2.19 | -4.84 | -6.50 | -3.20 | -3.24 | -2.55 | -2.42 | -0.57 | -1.41 |       |
| BMA1723  | DNA-binding response regulator, LuxR family                             | -2.70 | -2.02 | -2.93 | -2.69 | -2.88 | -2.74 | -1.85 | -1.40 | -2.98 | -3.00 | -0.40 | -1.01 |       |
| BMA2343  | iron-sulfur cluster assembly accessory protein                          | -1.74 | -0.34 | NaN   | -2.49 | -1.34 | -0.48 | -2.13 | -0.78 | -2.93 | -1.47 | -0.39 | -1.16 |       |
| BMA2707  | phosphoribosyl-AMP cyclohydrolase                                       | -1.42 | -0.94 | -1.42 | -1.95 | -2.09 | -1.83 | -1.73 | -1.31 | -2.33 | -1.56 | -0.51 | -1.17 |       |
| BMA2872  | ribosomal protein S21                                                   | -3.24 | -3.03 | NaN   | -2.77 | -3.33 | -3.51 | -2.30 | -2.10 | -2.04 | -2.74 | -0.65 | -1.14 |       |
| BMA0315  | efflux transporter, RND family, MFP subunit                             | -1.78 | -1.34 | NaN   | -2.43 | -2.00 | -1.88 | -1.30 | -0.95 | -2.74 | -2.16 | -0.54 | -1.07 |       |
| BMAA0238 | hypothetical protein                                                    | NaN   | -1.03 | NaN   | -1.84 | NaN   | -1.82 | -1.11 | -1.10 | NaN   | -1.99 | -0.54 | -1.01 |       |
| BMAA0883 | iron permease, FTR1 family                                              | -0.69 | -0.27 | NaN   | NaN   | -0.36 | -0.55 | -1.63 | -1.35 | -2.28 | -2.11 | -0.55 | -1.03 |       |
| BMA1714  | transcriptional regulator, IclR family                                  | -1.14 | -1.47 | NaN   | -2.08 | 0.07  | -0.96 | -0.80 | -0.73 | NaN   | -1.05 | -0.64 | -0.91 |       |
| BMAA0031 | transcriptional regulator, Crp/Fnr family                               | -3.22 | -2.36 | -3.18 | -2.48 | -2.47 | -2.59 | -1.95 | -1.75 | NaN   | -1.13 | -0.59 | -0.95 |       |
| BMA2279  | cold-shock domain family protein                                        | -5.34 | -4.67 | -6.46 | -6.21 | -6.67 | -5.60 | -4.48 | -3.93 | -5.19 | -4.94 | -0.57 | -0.87 |       |
| BMA2627  | ribosomal protein L22                                                   | -3.60 | -3.72 | NaN   | -3.29 | -3.32 | -3.31 | -2.46 | -2.31 | -3.63 | -3.28 | -0.52 | NaN   |       |
| BMAA0853 | hypothetical protein                                                    | -2.02 | -1.14 | -2.05 | NaN   | -0.73 | -1.44 | -0.57 | -0.36 | -0.52 | -0.99 | -0.53 | -0.94 |       |
| BMA2500  | 3-dehydroquinase dehydratase, type II                                   | -1.05 | -1.22 | NaN   | -1.52 | -1.64 | -2.05 | -1.55 | -1.58 | -1.62 | -1.33 | -0.67 | -0.97 |       |
| BMA2706  | phosphoribosyl-ATP pyrophosphohydrolase                                 | NaN   | -0.25 | NaN   | -1.38 | -1.34 | -1.88 | -1.44 | -1.12 | NaN   | -1.47 | -0.65 | -0.98 |       |
| BMAA2035 | stress response protein                                                 | -3.81 | -3.62 | -3.43 | NaN   | -3.04 | -2.14 | -1.28 | -0.71 | NaN   | -0.39 | -0.64 | -1.04 |       |
| BMA2917  | conserved hypothetical protein                                          | -0.62 | -0.36 | NaN   | -2.14 | -1.67 | -1.59 | -1.36 | -1.50 | -2.43 | -1.52 | -0.83 | -1.64 |       |
| BMAA0873 | hypothetical protein                                                    | -1.01 | -0.54 | -0.81 | NaN   | -0.79 | -0.03 | -1.71 | -1.06 | NaN   | -0.84 | -0.70 | -1.68 |       |
| BMAA1790 | conserved hypothetical protein, truncation                              | NaN   | -0.77 | NaN   | -2.26 | -1.29 | -1.28 | -1.57 | -0.95 | NaN   | -1.59 | -0.68 | -1.55 |       |
| BMA2927  | phenylalanine-4-hydroxylase                                             | -1.33 | -1.51 | -1.36 | -2.04 | -1.53 | -1.94 | -1.37 | -1.54 | -1.15 | -1.28 | -0.88 | -1.23 |       |
| BMA0549  | sigma-54 dependent DNA-binding response regulator                       | -2.53 | -1.56 | -2.11 | -2.08 | -1.12 | -1.85 | -1.26 | -0.85 | NaN   | -0.94 | -0.79 | -1.24 |       |
| BMAA0875 | oxidoreductase, aldo/keto reductase family                              | -1.28 | -0.92 | -1.71 | -2.17 | -0.90 | -1.20 | -2.03 | -1.58 | -1.71 | -1.58 | -0.78 | -1.22 |       |
| BMA0683  | conserved hypothetical protein                                          | -3.42 | -2.86 | -2.19 | -2.47 | -3.08 | -2.82 | -1.76 | -1.73 | -2.79 | -1.04 | -0.86 | -1.12 |       |
| BMA2050  | D-lactate dehydrogenase                                                 | -1.46 | -0.92 | -2.26 | -1.05 | -1.64 | -1.77 | -1.42 | -1.23 | -2.23 | -1.40 | -0.90 | -1.10 |       |
| BMA2709  | phosphoribosylformimino-5-aminoimidazole carboxamide ribotide isomerase | -1.92 | -2.17 | -2.59 | -2.87 | -2.43 | -2.42 | -2.40 | -2.43 | -3.58 | -2.26 | -0.82 | -1.09 |       |
| BMA0001  | chromosomal replication initiator protein DnaA                          | -2.76 | -2.83 | -1.69 | -1.53 | -2.40 | -2.60 | -1.22 | -1.05 | -1.72 | -1.91 | -0.78 | -1.05 |       |
| BMA0776  | ribosomal RNA large subunit methyltransferase J                         | NaN   | -1.85 | -1.62 | NaN   | -1.50 | -2.58 | -1.09 | NaN   | -0.86 | -2.68 | NaN   | NaN   |       |
| BMA1060  | ribosome-binding factor A                                               | -2.65 | -2.47 | NaN   | -1.81 | -1.58 | -1.56 | -1.25 | -0.94 | NaN   | -1.86 | -0.74 | -1.07 |       |
| BMAA0038 | hypothetical protein                                                    | NaN   | -1.29 | NaN   | -0.98 | -1.53 | -1.55 | -1.30 | -0.78 | -1.45 | -1.46 | -0.78 | -1.14 |       |
| BMA1826  | NADH dehydrogenase I, D subunit                                         | -4.45 | -3.42 | NaN   | -2.78 | -3.28 | -3.51 | -2.48 | -2.48 | NaN   | -1.67 | -0.77 | NaN   |       |

|                |                                                      |       |       |       |       |       |       |       |       |       |       |       |       |
|----------------|------------------------------------------------------|-------|-------|-------|-------|-------|-------|-------|-------|-------|-------|-------|-------|
| BMA0192        | conserved hypothetical protein                       | -1.69 | -1.31 | NaN   | NaN   | -1.48 | -2.06 | -1.08 | -1.59 | NaN   | -1.23 | -0.77 | -1.16 |
| BMAA0866       | hypothetical protein                                 | -4.71 | -3.36 | -3.63 | -3.37 | -4.29 | -3.69 | -2.60 | -2.15 | -3.44 | -3.46 | NaN   | NaN   |
| BMA1453        | peptidyl-prolyl cis-trans isomerase D, putative      | -1.64 | -1.43 | -0.22 | -1.49 | -1.96 | -2.37 | -1.77 | -1.34 | -2.40 | -1.88 | -0.75 | -1.18 |
| BMAA1546       | hypothetical protein                                 | -1.99 | -1.30 | NaN   | NaN   | NaN   | -0.75 | -1.10 | -0.47 | NaN   | -1.20 | -0.75 | NaN   |
| BMAA0943       | conserved hypothetical protein                       | -3.40 | -2.94 | -3.02 | -3.10 | -2.46 | -2.52 | -1.32 | -1.33 | -2.63 | -2.19 | -0.87 | -1.02 |
| BMA1378        | Rrf2 family protein                                  | -2.56 | -2.63 | -2.01 | -3.36 | -2.03 | -2.38 | -2.14 | -1.76 | -2.50 | -2.58 | -0.95 | -1.04 |
| BMA2509        | ribonucleoside-diphosphate reductase, beta subunit   | -1.24 | -2.00 | -1.60 | -2.37 | -2.94 | -3.15 | -2.24 | -2.41 | -3.22 | -2.77 | -0.97 | -1.08 |
| BMAA1805       | hypothetical protein                                 | -0.96 | -0.28 | NaN   | -1.17 | -0.53 | -0.70 | -1.21 | -1.21 | -4.11 | -3.68 | -0.96 | -1.11 |
| BMA1820        | NADH dehydrogenase I, J subunit                      | -2.11 | -1.80 | NaN   | -1.24 | -2.31 | -2.57 | -1.85 | -1.61 | NaN   | -1.13 | -1.02 | -1.47 |
| BMA2695        | stringent starvation protein A                       | -2.04 | -2.31 | -0.91 | -2.08 | -2.56 | -2.79 | -2.28 | -2.34 | -2.96 | -1.98 | -1.00 | -1.48 |
| BMA2712        | imidazoleglycerol-phosphate dehydratase              | -2.06 | -1.44 | -1.99 | -2.03 | -2.23 | -2.33 | -1.37 | -1.20 | -2.27 | -2.03 | -0.89 | -1.44 |
| BMA2469        | transketolase                                        | -3.27 | -2.48 | -3.13 | -2.79 | -3.17 | -1.92 | -1.79 | -1.47 | -3.27 | -1.92 | -0.93 | -1.46 |
| BMA3381        | conserved hypothetical protein                       | -1.87 | -1.29 | -1.43 | -2.11 | -1.96 | -1.97 | -1.07 | -0.56 | -1.77 | -1.41 | -0.95 | -1.42 |
| BMA2754        | conserved hypothetical protein                       | -2.29 | -1.84 | -2.70 | -2.30 | -3.14 | -2.18 | -1.92 | -1.39 | -3.13 | -2.11 | -1.00 | -1.40 |
| BMA1325        | competence lipoprotein ComL                          | -3.75 | -3.20 | -3.46 | -3.19 | -3.66 | -3.58 | -2.88 | -1.90 | -3.77 | -3.25 | -0.99 | -1.33 |
| BMA2926        | pterin-4-alpha-carbinolamine dehydratase, putative   | -1.78 | -1.47 | -1.95 | -1.94 | -1.68 | -1.82 | -0.92 | -0.99 | -0.95 | -1.24 | -0.95 | -1.35 |
| BMA0094        | isocitrate dehydrogenase kinase/phosphatase          | -2.56 | -2.67 | NaN   | -1.52 | -0.93 | -1.87 | -0.73 | -1.55 | NaN   | -1.12 | -0.96 | NaN   |
| BMA2173        | protein-L-isoaspartate O-methyltransferase, putative | -2.33 | -1.57 | NaN   | NaN   | -2.21 | -2.29 | -1.29 | -1.27 | NaN   | -1.08 | NaN   | NaN   |
| BMAA0024       | hypothetical protein                                 | -3.45 | -1.69 | -4.15 | -4.60 | NaN   | -1.67 | -2.35 | -1.77 | -4.04 | -3.56 | -0.96 | -1.36 |
| BMA1603        | hypothetical protein                                 | -3.04 | -1.76 | -2.26 | -1.34 | -1.95 | -1.78 | -1.51 | -1.20 | -2.32 | -2.52 | -1.12 | -1.55 |
| BMA1465        | ATP-dependent Clp protease, proteolytic subunit ClpP | -2.79 | -3.30 | -2.96 | -3.06 | -2.45 | -2.99 | -1.91 | -2.09 | -3.37 | -3.21 | -1.18 | -1.64 |
| BMAA1507       | hypothetical protein                                 | -3.01 | -3.24 | -2.69 | -2.01 | -2.88 | -2.91 | -1.05 | -1.18 | -2.44 | -2.33 | -1.22 | -1.57 |
| BMA2535        | conserved hypothetical protein                       | -1.91 | -2.20 | -2.03 | -2.28 | -1.98 | -2.61 | -1.94 | -1.98 | -2.34 | -1.74 | -1.15 | -1.18 |
| BMA2787        | ippF protein, putative                               | -0.90 | -0.83 | -0.69 | -2.13 | -1.30 | -1.64 | -1.46 | -1.14 | -1.70 | -1.53 | -1.14 | -1.14 |
| BMA2078        | tolQ protein                                         | -0.77 | -0.53 | NaN   | NaN   | -1.27 | -0.95 | -1.83 | -1.44 | NaN   | -1.68 | -1.11 | -1.20 |
| BMA2587        | orotate phosphoribosyltransferase                    | -2.56 | -2.27 | -2.08 | -1.53 | -2.45 | -2.48 | -1.83 | -0.98 | -1.42 | -1.30 | -1.09 | -1.20 |
| BMAA0018       | acetoacetate decarboxylase                           | -1.78 | -2.06 | -0.79 | NaN   | -1.32 | -1.89 | -1.73 | -2.03 | -2.14 | -1.34 | -1.09 | -1.16 |
| BMA2089        | outer membrane porin, putative                       | -3.06 | -3.01 | -3.85 | -3.14 | -3.54 | -3.37 | -2.28 | -2.51 | -2.56 | -2.21 | -1.05 | -1.12 |
| BMA2232        | ribosomal protein L33                                | -4.68 | -4.68 | -2.51 | -3.41 | -5.24 | -4.48 | -3.02 | -2.70 | -4.33 | -3.77 | -1.05 | -1.12 |
| BMA3088        | conserved hypothetical protein                       | -2.62 | -1.41 | NaN   | NaN   | -4.64 | -3.04 | NaN   | -1.48 | NaN   | -1.58 | -1.02 | -1.18 |
| BMA2522        | ribosomal protein L27                                | -3.79 | -4.34 | -2.41 | -3.47 | -4.38 | -4.35 | -3.37 | -2.83 | -3.51 | -3.45 | -1.04 | -1.22 |
| BMA0599        | fatty acid desaturase domain protein                 | -2.39 | -2.58 | -1.89 | NaN   | -2.65 | -2.74 | -0.30 | -0.59 | NaN   | -0.01 | -0.99 | -1.23 |
| BMAA0519       | GTP-binding protein YchF                             | -2.48 | -2.73 | NaN   | -2.02 | -2.29 | -2.63 | -1.35 | -1.40 | NaN   | -1.58 | -0.99 | -1.20 |
| BMA1369        | ribosomal protein L31                                | -5.84 | -5.13 | -3.91 | -4.35 | -5.90 | -5.52 | -3.79 | -3.58 | -5.55 | -3.98 | -1.07 | -1.27 |
| BMA2611        | translation initiation factor IF-1                   | -5.04 | -3.99 | -1.85 | -3.87 | -4.66 | -4.50 | -2.94 | -2.48 | -3.83 | -3.91 | -1.04 | -1.27 |
| BMA2696        | ubiquinol-cytochrome c reductase, cytochrome c1      | -1.92 | -2.29 | -2.39 | -3.26 | -2.25 | -2.43 | -2.36 | -2.63 | -2.78 | -2.41 | -1.09 | -1.30 |
| BMA0743        | outer membrane porin, putative                       | NaN   | NaN   | NaN   | -3.35 | NaN   | -0.75 | -1.61 | -1.65 | -1.87 | -1.68 | -1.10 | -1.35 |
| BMA2946        | sporulation initiation inhibitor protein Soj         | -1.96 | -1.08 | -1.39 | -2.21 | -2.49 | -2.03 | -2.12 | -1.17 | -1.74 | -1.57 | -1.10 | -1.35 |
| BMAA1353       | outer membrane porin OpcP                            | -2.60 | -4.34 | -2.89 | -2.56 | -3.19 | -5.43 | -3.49 | -2.65 | -2.91 | -1.88 | -1.11 | -1.39 |
| BMA1717        | D-alanyl-D-alanine endopeptidase, putative           | -2.18 | -2.59 | -2.37 | -2.48 | -2.65 | -3.21 | -1.99 | -2.11 | -2.42 | -2.27 | -1.24 | -1.34 |
| BMAA0422       | conserved hypothetical protein                       | -0.97 | -0.53 | -0.96 | -1.33 | -0.76 | -1.31 | -1.30 | -1.15 | -1.25 | -1.43 | -1.23 | -1.33 |
| BMA1052        | 2-oxoglutarate dehydrogenase, E1 component           | -3.81 | -3.87 | -3.23 | -3.19 | -3.24 | -3.73 | -2.74 | -2.36 | -3.34 | -2.91 | -1.17 | -1.29 |
| BMAA2113       | arsenate reductase                                   | -1.74 | -1.35 | -1.26 | -1.90 | -2.09 | -2.22 | -2.70 | -1.83 | NaN   | -1.85 | -1.19 | -1.33 |
| <b>Group 3</b> |                                                      |       |       |       |       |       |       |       |       |       |       |       |       |
| BMAA0728       | hypothetical protein                                 | 0.30  | 1.02  | -0.36 | -0.16 | 0.02  | -0.10 | -1.17 | -0.34 | -2.14 | -1.67 | -1.99 | -2.17 |
| BMAA0277       | hypothetical protein                                 | 1.48  | 0.54  | 1.87  | 0.17  | 1.15  | 0.31  | -0.34 | -1.16 | 0.86  | 0.11  | -1.54 | -1.34 |
| BMA1144        | arginine/ornithine antiporter                        | -2.75 | -2.99 | -2.97 | 0.77  | -0.47 | -0.85 | -0.07 | -0.10 | -0.33 | 0.53  | -1.54 | -1.70 |
| BMAA2014       | hypothetical protein                                 | 1.56  | 1.65  | NaN   | 1.41  | 2.00  | 1.00  | -0.46 | 1.97  | 1.35  | 1.29  | -1.87 | 0.13  |
| BMAA1511       | conserved hypothetical protein                       | 0.47  | 0.01  | 0.01  | -0.28 | 0.16  | -0.21 | -0.16 | -0.92 | -3.45 | -3.23 | -1.00 | -0.70 |

|          |                                                                                  |       |       |       |       |       |       |       |       |       |       |       |       |
|----------|----------------------------------------------------------------------------------|-------|-------|-------|-------|-------|-------|-------|-------|-------|-------|-------|-------|
| BMAA1488 | hypothetical protein                                                             | -2.61 | -2.29 | -2.85 | 0.61  | -1.24 | -1.22 | -0.16 | -0.30 | NaN   | 0.59  | -0.94 | -1.27 |
| BMA0605  | conserved hypothetical protein                                                   | -3.90 | -2.84 | -4.09 | -0.15 | -3.86 | -3.17 | -1.39 | -1.01 | NaN   | 0.63  | -1.15 | -1.06 |
| BMAA0011 | tartrate dehydrogenase                                                           | 0.43  | 0.59  | 0.41  | 0.90  | 0.87  | 0.82  | -0.35 | -0.40 | 1.24  | 1.58  | 0.02  | -0.34 |
| BMAA0751 | N-acetylmuramoyl-L-alanine amidase domain protein                                | -0.16 | 0.95  | NaN   | NaN   | NaN   | 1.00  | 0.68  | 0.18  | -2.57 | -2.40 | 0.01  | -0.08 |
| BMAA1548 | type III secretion system protein BsaL                                           | -2.65 | -2.34 | -2.64 | NaN   | NaN   | 0.10  | 0.51  | 0.22  | -1.81 | -1.57 | 0.05  | -0.12 |
| BMA3179  | hypothetical protein                                                             | -1.91 | -1.29 | -2.47 | -0.02 | -2.19 | -2.00 | -0.42 | -0.45 | 0.22  | 0.39  | -0.23 | -0.16 |
| BMAA1662 | response regulator                                                               | 0.73  | 1.34  | 0.32  | 0.66  | 0.54  | 1.15  | 0.39  | -0.32 | NaN   | 1.11  | -0.62 | -0.37 |
| BMAA0089 | membrane protein, putative                                                       | 0.52  | 0.26  | 1.36  | NaN   | NaN   | 1.31  | -0.73 | -0.76 | NaN   | 0.82  | -0.38 | -0.62 |
| BMA0656  | glutamine synthetase family protein                                              | -1.25 | -1.57 | -2.18 | -2.66 | 0.44  | 0.24  | -0.96 | -1.13 | -0.89 | -0.84 | -0.71 | -0.68 |
| BMA2323  | 3-methyl-2-oxobutanoate hydroxymethyltransferase                                 | 0.08  | 0.86  | NaN   | NaN   | -0.35 | -0.04 | NaN   | -0.05 | NaN   | 0.08  | -0.66 | -0.77 |
| BMAA0023 | cytochrome P450-related protein                                                  | 1.89  | 1.66  | NaN   | 0.45  | NaN   | 1.97  | -0.78 | -0.06 | NaN   | 1.09  | -0.51 | -0.97 |
| BMAA0198 | muconolactone delta-isomerase                                                    | 0.36  | NaN   | -0.15 | -2.33 | NaN   | 0.18  | -0.68 | -0.91 | 0.84  | -0.11 | -0.52 | -0.90 |
| BMAA1785 | chitin binding domain protein                                                    | 0.91  | 2.02  | 0.98  | 1.21  | 0.94  | 1.85  | 0.49  | 0.89  | -0.65 | -0.37 | 2.38  | 2.22  |
| BMA1148  | oxidoreductase, short-chain dehydrogenase/reductase family                       | -0.39 | -1.06 | 0.23  | 1.85  | 1.60  | 1.26  | 1.80  | 1.68  | 1.81  | 1.47  | 2.39  | 2.73  |
| BMA2726  | ABC transporter, ATP-binding protein                                             | 0.19  | 0.40  | -1.31 | 0.06  | -0.33 | -1.16 | -1.84 | -0.09 | -0.35 | 0.06  | -0.19 | 0.88  |
| BMAA1547 | type III secretion system protein BsaM                                           | -0.77 | -0.78 | -1.43 | NaN   | 0.76  | 0.63  | 0.86  | 0.96  | -0.54 | -0.29 | 0.37  | 0.20  |
| BMA0018  | hypothetical protein                                                             | 1.38  | 0.70  | 2.16  | 0.21  | 1.69  | 1.14  | 1.23  | 0.36  | -0.35 | -0.46 | 0.39  | -0.29 |
| BMA1051  | 2-oxoglutarate dehydrogenase, E2 component, dihydrolipoamide succinyltransferase | -1.25 | -0.74 | NaN   | NaN   | NaN   | 0.03  | 0.91  | 1.11  | NaN   | 0.31  | NaN   | NaN   |
| BMAA1828 | hemin ABC transporter, periplasmic hemin-binding protein                         | 0.51  | 1.04  | NaN   | NaN   | NaN   | 1.08  | 1.42  | 1.04  | -1.99 | -1.92 | 0.48  | NaN   |
| BMA1191  | RNA polymerase sigma-70 factor, ECF subfamily                                    | NaN   | 0.08  | NaN   | NaN   | NaN   | 0.49  | -0.36 | 0.41  | -5.11 | -2.93 | 0.18  | NaN   |
| BMAA0708 | conserved hypothetical protein                                                   | -3.15 | -2.86 | -3.81 | 0.95  | -2.07 | -1.97 | -0.22 | -0.23 | NaN   | 0.34  | 0.28  | -0.18 |
| BMAA0638 | sugar ABC transporter, ATP-binding protein                                       | 0.63  | 0.89  | -0.39 | NaN   | 0.51  | 1.62  | 1.36  | 1.27  | 1.56  | 1.45  | 0.57  | 0.59  |
| BMAA1549 | type III secretion system protein BsaK                                           | -0.63 | -0.39 | -0.12 | NaN   | 1.79  | 1.31  | 1.80  | 1.30  | 0.41  | -0.32 | 0.79  | 0.42  |
| BMA3176  | cyd operon protein YbgT                                                          | -1.42 | -1.64 | -1.60 | -0.75 | -1.29 | -1.41 | 0.29  | 0.12  | 0.38  | -0.64 | 0.61  | 0.24  |
| BMAA0703 | DNA-binding response regulator, LuxR family                                      | 0.29  | 0.58  | -0.33 | 0.56  | 1.09  | 1.03  | 0.62  | 1.52  | 1.14  | 2.41  | 1.31  | 1.63  |
| BMAA1431 | cysteine-rich domain protein                                                     | 0.30  | -0.04 | -0.53 | 1.36  | 1.68  | 1.24  | 1.97  | 1.01  | 1.84  | 1.65  | 1.48  | 1.58  |
| BMAA2034 | conserved hypothetical protein                                                   | -0.44 | -0.81 | -1.74 | 1.53  | 0.28  | -0.26 | 1.40  | 1.67  | 1.58  | NaN   | 1.57  | 1.83  |
| BMA1190  | mbtH-like protein                                                                | 0.22  | 1.17  | 0.38  | 0.43  | 0.41  | 1.99  | 0.85  | 1.60  | -2.63 | -1.53 | 1.83  | 1.34  |
| BMA1205  | cys regulon transcriptional activator                                            | 1.02  | 0.70  | NaN   | 0.52  | 1.46  | 0.11  | 0.22  | 0.04  | -0.53 | -0.88 | 1.10  | 1.38  |
| BMAA0732 | conserved hypothetical protein                                                   | 1.36  | 1.36  | 0.85  | 1.34  | 0.83  | 2.03  | 2.04  | 1.57  | -0.09 | -0.48 | 1.04  | 1.26  |
| BMAA1529 | DNA-binding protein BprA                                                         | -0.69 | -1.10 | -1.72 | 1.19  | 1.23  | 0.81  | 1.06  | 0.73  | -1.44 | -1.56 | 0.75  | 1.40  |
| BMA1304  | outer membrane protein, OmpW family                                              | -3.04 | -2.92 | -2.60 | 0.77  | -3.11 | -3.20 | -0.23 | -0.79 | 0.64  | 0.66  | 1.11  | 0.95  |
| BMAA1395 | cyclic nucleotide-binding domain protein                                         | -2.03 | -1.19 | -2.39 | -0.86 | -2.06 | -1.05 | 0.15  | 0.40  | -2.17 | -1.44 | 0.99  | 1.02  |
| BMA2751  | hypothetical protein                                                             | -0.35 | 1.03  | -0.88 | 0.30  | -0.31 | 1.40  | 0.45  | 1.56  | -0.68 | 0.57  | 0.93  | 0.84  |
| BMAA1145 | sensor histidine kinase                                                          | -0.04 | 0.49  | -0.68 | 0.71  | 0.03  | 0.42  | 0.93  | 1.52  | 0.25  | 0.69  | 0.98  | 0.90  |
| BMA3052  | nitrite/sulfite reductase family protein                                         | -1.77 | -1.58 | -0.96 | -1.53 | -1.86 | -1.93 | 0.68  | 0.55  | 0.51  | 0.48  | 0.79  | 0.78  |
| BMA0455  | glutamine amidotransferase, class I                                              | -0.97 | -1.44 | -0.62 | -1.05 | 0.37  | -0.76 | 0.12  | -0.08 | NaN   | -0.57 | 0.82  | 0.82  |
