# Supplementary material for: Bacterial genome adaptation to niches: Divergence of the potential virulence genes in three Burkholderia species of different survival strategies
Source: PubMed Central journal article supplement (PMC1343551; doi:10.1186/1471-2164-6-174), 2005-12-07
Supplement: 1471-2164-6-174-S4.pdf [file 1471-2164-6-174-S4.pdf]

**Sup\_Table\_2. Comparison of the whole genomes in Fig. 3A.**

**Segment 1- Conserved in Bm, Bp, and Bt**

| Gene      | Description                                                           | to Bp    |            | to Bt    |            |
|-----------|-----------------------------------------------------------------------|----------|------------|----------|------------|
|           |                                                                       | % length | % identity | % length | % identity |
| BMA0001   | chromosomal replication initiator protein DnaA                        | 100      | 99         | 100      | 96         |
| BMA0002   | DNA polymerase III, beta subunit                                      | 100      | 100        | 100      | 99         |
| BMA0003   | DNA gyrase, B subunit                                                 | 100      | 100        | 100      | 99         |
| BMA0006   | carboxymuconolactone decarboxylase family protein                     | 100      | 98         | 100      | 99         |
| BMA0010   | hypothetical protein                                                  | 100      | 99         | 100      | 92         |
| BMA0011   | hypothetical protein                                                  | 100      | 100        | 100      | 91         |
| BMA0014.1 | hypothetical protein                                                  | 100      | 99         | 96       | 94         |
| BMA0018   | hypothetical protein                                                  | 100      | 99         | 100      | 95         |
| BMA0019   | FHA domain protein                                                    | 100      | 100        | 100      | 94         |
| BMA0020   | protein kinase domain protein                                         | 100      | 99         | 100      | 90         |
| BMA0023   | conserved hypothetical protein                                        | 100      | 99         | 100      | 90         |
| BMA0024   | aldolase, class II                                                    | 100      | 98         | 100      | 91         |
| BMA0027   | polysaccharide biosynthesis family protein                            | 100      | 100        | 100      | 96         |
| BMA0028   | glycosyl transferase, group 1 family protein                          | 100      | 99         | 100      | 94         |
| BMA0029   | mannose-1-phosphate guanylyltransferase/mannose-6-phosphate isomerase | 100      | 99         | 100      | 92         |
| BMA0030   | ElaA family protein                                                   | 100      | 99         | 100      | 90         |
| BMA0032   | glycosyl transferase, group 1 family protein                          | 100      | 99         | 100      | 93         |
| BMA0037   | sigma-54 dependent transcriptional regulator                          | 100      | 99         | 100      | 97         |
| BMA0039   | beta-mannosidase-related protein                                      | 100      | 99         | 100      | 91         |
| BMA0040   | conserved hypothetical protein                                        | 100      | 100        | 100      | 94         |
| BMA0041   | conserved hypothetical protein                                        | 100      | 99         | 100      | 95         |
| BMA0042   | acyl-CoA dehydrogenase domain protein                                 | 100      | 99         | 100      | 96         |
| BMA0043   | acyl carrier protein, putative                                        | 100      | 100        | 100      | 95         |
| BMA0044   | conserved hypothetical protein                                        | 100      | 99         | 100      | 96         |
| BMA0045   | conserved hypothetical protein                                        | 100      | 100        | 100      | 98         |
| BMA0046   | polysaccharide biosynthesis glycosyltransferase, putative             | 100      | 99         | 100      | 92         |
| BMA0047   | capsular polysaccharide biosynthesis/export periplasmic protein       | 100      | 99         | 100      | 96         |
| BMA0048   | glycosyl transferase, group 1 family protein                          | 100      | 99         | 100      | 93         |
| BMA0052   | lipoic acid synthetase                                                | 100      | 99         | 100      | 99         |
| BMA0053   | lipoate-protein ligase B                                              | 100      | 98         | 100      | 90         |
| BMA0055   | glycine cleavage system transcriptional activator                     | 100      | 100        | 98       | 93         |
| BMA0056   | conserved hypothetical protein                                        | 100      | 100        | 100      | 99         |
| BMA0057   | D-amino acid aminotransferase                                         | 100      | 100        | 96       | 95         |
| BMA0058   | D-alanyl-D-alanine carboxypeptidase family protein                    | 100      | 99         | 100      | 98         |
| BMA0060   | conserved hypothetical protein                                        | 100      | 99         | 100      | 94         |
| BMA0061   | ferredoxin, 2Fe-2S                                                    | 100      | 99         | 100      | 96         |
| BMA0062   | membrane protein, putative                                            | 100      | 98         | 100      | 93         |
| BMA0063   | lipoprotein, putative                                                 | 100      | 98         | 99       | 91         |
| BMA0064   | ABC transporter, periplasmic substrate-binding protein                | 100      | 100        | 100      | 95         |
| BMA0065   | ABC transporter, ATP-binding protein                                  | 100      | 99         | 100      | 96         |
| BMA0066   | ABC transporter, permease protein                                     | 100      | 99         | 100      | 97         |
| BMA0067   | 2',3'-cyclic-nucleotide 2'-phosphodiesterase                          | 100      | 99         | 100      | 95         |
| BMA0068   | conserved hypothetical protein                                        | 100      | 99         | 100      | 87         |
| BMA0069   | biotin--acetyl-CoA-carboxylase ligase                                 | 100      | 98         | 100      | 90         |

|           |                                                                                    |     |     |     |    |
|-----------|------------------------------------------------------------------------------------|-----|-----|-----|----|
| BMA0070   | transcriptional activator, Baf family                                              | 100 | 99  | 100 | 94 |
| BMA0072   | cytidyltransferase-related domain protein                                          | 100 | 100 | 99  | 95 |
| BMA0073   | conserved hypothetical protein                                                     | 100 | 100 | 100 | 99 |
| BMA0074   | conserved hypothetical protein, authentic point mutation                           | 100 | 99  | 100 | 95 |
| BMA0075   | conserved hypothetical protein                                                     | 100 | 98  | 99  | 88 |
| BMA0076   | enoyl-CoA hydratase/isomerase family protein                                       | 100 | 99  | 100 | 97 |
| BMA0077   | fumarylacetoacetate hydrolase family protein                                       | 100 | 99  | 100 | 97 |
| BMA0081   | 5-methyltetrahydrofolate--homocysteine methyltransferase, authentic point mutation | 100 | 99  | 100 | 95 |
| BMA0083   | conserved hypothetical protein                                                     | 100 | 100 | 100 | 99 |
| BMA0084   | arginyl-tRNA synthetase                                                            | 100 | 99  | 100 | 97 |
| BMA0085   | sporulation-related repeat protein                                                 | 100 | 100 | 100 | 96 |
| BMA0086   | thiol:disulfide interchange protein DsbA                                           | 100 | 100 | 100 | 98 |
| BMA0087   | oxidoreductase, short-chain dehydrogenase/reductase family                         | 100 | 99  | 100 | 96 |
| BMA0088   | 3-alpha-hydroxysteroid dehydrogenase, putative                                     | 100 | 100 | 100 | 89 |
| BMA0089   | transcriptional regulator, MarR family                                             | 100 | 100 | 100 | 90 |
| BMA0091   | peptide ABC transporter, periplasmic peptide-binding protein                       | 100 | 99  | 100 | 96 |
| BMA0092   | peptide ABC transporter, ATP-binding protein                                       | 100 | 100 | 100 | 94 |
| BMA0093   | metallo-beta-lactamase family protein                                              | 100 | 99  | 99  | 91 |
| BMA0094   | isocitrate dehydrogenase kinase/phosphatase                                        | 100 | 100 | 100 | 97 |
| BMA0095   | beta carbonic anhydrase                                                            | 100 | 100 | 100 | 94 |
| BMA0096   | 3-ketoacyl-CoA thiolase                                                            | 100 | 100 | 100 | 96 |
| BMA0097   | oxidoreductase, short chain dehydrogenase/reductase family                         | 100 | 98  | 100 | 92 |
| BMA0098   | conserved hypothetical protein                                                     | 100 | 100 | 100 | 92 |
| BMA0100   | adenosylmethionine-8-amino-7-oxononanoate aminotransferase                         | 100 | 99  | 100 | 97 |
| BMA0101   | 8-amino-7-oxononanoate synthase                                                    | 100 | 100 | 100 | 94 |
| BMA0102   | dethiobiotin synthetase                                                            | 100 | 99  | 100 | 87 |
| BMA0103   | biotin synthase                                                                    | 100 | 99  | 100 | 98 |
| BMA0104   | cutC family protein                                                                | 100 | 99  | 100 | 94 |
| BMA0106   | alkaline phosphatase family protein                                                | 100 | 99  | 100 | 93 |
| BMA0107   | alkaline phosphatase family protein                                                | 100 | 99  | 100 | 96 |
| BMA0109   | conserved domain protein                                                           | 99  | 96  | 99  | 89 |
| BMA0113   | conserved hypothetical protein                                                     | 100 | 100 | 100 | 95 |
| BMA0114   | glyoxalase family protein                                                          | 100 | 100 | 100 | 94 |
| BMA0115   | ADA regulatory protein                                                             | 100 | 99  | 100 | 95 |
| BMA0117   | glutamate--cysteine ligase                                                         | 100 | 99  | 100 | 97 |
| BMA0118   | RNA polymerase sigma factor RpoD, putative                                         | 100 | 99  | 100 | 87 |
| BMA0120.1 | hypothetical protein                                                               | 100 | 98  | 100 | 88 |
| BMA0128   | portal protein, PBSX family                                                        | 100 | 98  | 97  | 98 |
| BMA0133   | ISBma1, transposase                                                                | 100 | 99  | 100 | 98 |
| BMA0135   | conserved hypothetical protein                                                     | 100 | 100 | 100 | 98 |
| BMA0136   | patatin-like phospholipase                                                         | 100 | 100 | 100 | 95 |
| BMA0137   | glyoxylate reductase                                                               | 100 | 99  | 100 | 96 |
| BMA0138   | transcriptional regulator, LysR family                                             | 100 | 100 | 100 | 98 |
| BMA0139   | DNA topoisomerase III                                                              | 100 | 99  | 100 | 98 |
| BMA0140   | conserved hypothetical protein                                                     | 100 | 100 | 100 | 93 |
| BMA0141   | DNA processing protein DprA, putative                                              | 100 | 99  | 100 | 92 |
| BMA0142   | polypeptide deformylase                                                            | 100 | 99  | 100 | 97 |
| BMA0143   | methionyl-tRNA formyltransferase                                                   | 100 | 99  | 100 | 92 |
| BMA0144   | homoserine/threonine efflux protein, putative                                      | 100 | 100 | 100 | 94 |

|         |                                                                              |     |     |     |     |
|---------|------------------------------------------------------------------------------|-----|-----|-----|-----|
| BMA0145 | heat shock protein HtpX, putative                                            | 100 | 100 | 100 | 98  |
| BMA0146 | sun protein                                                                  | 100 | 100 | 100 | 94  |
| BMA0147 | conserved hypothetical protein                                               | 100 | 99  | 100 | 97  |
| BMA0148 | nitrogen regulation protein NtrY, putative                                   | 100 | 99  | 100 | 98  |
| BMA0149 | DNA-binding response regulator                                               | 100 | 99  | 100 | 97  |
| BMA0152 | exsB protein                                                                 | 100 | 99  | 100 | 96  |
| BMA0153 | conserved hypothetical protein                                               | 100 | 100 | 100 | 96  |
| BMA0154 | 6-pyruvoyl tetrahydrobiopterin synthase, putative                            | 100 | 99  | 100 | 98  |
| BMA0156 | HpcH/Hpal aldolase family protein                                            | 100 | 100 | 100 | 95  |
| BMA0157 | conserved hypothetical protein                                               | 100 | 98  | 98  | 86  |
| BMA0158 | rod shape-determining protein RodA                                           | 100 | 100 | 100 | 98  |
| BMA0159 | penicillin-binding protein 2                                                 | 100 | 97  | 100 | 91  |
| BMA0160 | rod shape-determining protein MreD                                           | 100 | 99  | 100 | 97  |
| BMA0161 | rod shape-determining protein MreC                                           | 100 | 100 | 100 | 93  |
| BMA0162 | rod shape-determining protein MreB                                           | 100 | 100 | 100 | 100 |
| BMA0163 | glutamyl-tRNA(Gln) amidotransferase, C subunit                               | 100 | 100 | 100 | 96  |
| BMA0164 | glutamyl-tRNA(Gln) amidotransferase, A subunit                               | 100 | 99  | 100 | 98  |
| BMA0165 | glutamyl-tRNA(Gln) amidotransferase, B subunit                               | 100 | 99  | 100 | 97  |
| BMA0166 | conserved hypothetical protein                                               | 100 | 100 | 100 | 88  |
| BMA0167 | exodeoxyribonuclease III                                                     | 100 | 100 | 100 | 97  |
| BMA0170 | conserved hypothetical protein                                               | 100 | 99  | 100 | 92  |
| BMA0171 | esterase, putative                                                           | 100 | 100 | 100 | 94  |
| BMA0172 | conserved hypothetical protein                                               | 100 | 100 | 100 | 92  |
| BMA0173 | drug resistance transporter, EmrB/QacA family                                | 100 | 99  | 100 | 94  |
| BMA0174 | transcriptional regulator, MarR family                                       | 100 | 100 | 100 | 96  |
| BMA0175 | intracellular protease, Pfpl family                                          | 100 | 99  | 100 | 96  |
| BMA0176 | D-serine deaminase, putative                                                 | 100 | 98  | 100 | 96  |
| BMA0177 | transcriptional regulator, putative                                          | 100 | 99  | 100 | 94  |
| BMA0179 | endoribonuclease L-PSP, putative                                             | 100 | 100 | 100 | 100 |
| BMA0180 | GTP cyclohydrolase family protein                                            | 100 | 99  | 100 | 97  |
| BMA0181 | threonine ammonia-lyase, biosynthetic                                        | 100 | 99  | 100 | 96  |
| BMA0183 | oxidoreductase, FAD-binding                                                  | 100 | 99  | 100 | 97  |
| BMA0184 | conserved hypothetical protein                                               | 100 | 99  | 100 | 97  |
| BMA0185 | conserved hypothetical protein                                               | 100 | 100 | 100 | 95  |
| BMA0186 | ubiquinone/menaquinone biosynthesis methyltransferase UbiE                   | 100 | 100 | 100 | 100 |
| BMA0187 | conserved hypothetical protein                                               | 100 | 99  | 100 | 91  |
| BMA0188 | conserved hypothetical protein                                               | 100 | 100 | 100 | 93  |
| BMA0189 | 2-polyprenylphenol 6-hydroxylase                                             | 100 | 100 | 100 | 98  |
| BMA0191 | conserved hypothetical protein                                               | 100 | 97  | 100 | 90  |
| BMA0192 | conserved hypothetical protein                                               | 100 | 100 | 100 | 98  |
| BMA0193 | aspartyl-tRNA synthetase                                                     | 100 | 100 | 100 | 98  |
| BMA0194 | dATP pyrophosphohydrolase                                                    | 100 | 100 | 100 | 95  |
| BMA0195 | cardiolipin synthetase II                                                    | 100 | 99  | 100 | 95  |
| BMA0196 | transcriptional regulator, TetR family                                       | 100 | 100 | 100 | 100 |
| BMA0197 | acyl-CoA dehydrogenase domain protein                                        | 100 | 99  | 100 | 98  |
| BMA0198 | 3-hydroxyacyl-CoA dehydrogenase/enoyl-CoA hydratase/isomerase family protein | 100 | 99  | 100 | 95  |
| BMA0199 | thiolase family protein                                                      | 100 | 99  | 100 | 97  |
| BMA0200 | enoyl-CoA hydratase/isomerase family protein                                 | 100 | 100 | 100 | 95  |
| BMA0201 | formate dehydrogenase accessory protein                                      | 100 | 99  | 100 | 95  |

|         |                                                          |     |     |     |     |
|---------|----------------------------------------------------------|-----|-----|-----|-----|
| BMA0202 | conserved hypothetical protein                           | 100 | 100 | 100 | 94  |
| BMA0203 | thioesterase domain protein                              | 100 | 99  | 100 | 99  |
| BMA0204 | ABC transporter, ATP-binding/permease protein            | 100 | 100 | 100 | 96  |
| BMA0206 | nucleotidyltransferase family protein                    | 100 | 100 | 100 | 94  |
| BMA0207 | conserved hypothetical protein                           | 100 | 99  | 100 | 93  |
| BMA0208 | organic solvent tolerance protein, putative              | 100 | 100 | 100 | 96  |
| BMA0209 | survival protein SurA, putative                          | 100 | 99  | 100 | 96  |
| BMA0210 | 4-hydroxythreonine-4-phosphate dehydrogenase             | 100 | 97  | 100 | 91  |
| BMA0211 | dimethyladenosine transferase                            | 100 | 100 | 99  | 95  |
| BMA0213 | lactoylglutathione lyase                                 | 100 | 100 | 100 | 96  |
| BMA0215 | conserved hypothetical protein                           | 100 | 99  | 100 | 95  |
| BMA0216 | 1-acyl-sn-glycerol-3-phosphate acyltransferase, putative | 100 | 100 | 99  | 96  |
| BMA0217 | HAD-superfamily hydrolase                                | 100 | 99  | 100 | 95  |
| BMA0218 | glycyl-tRNA synthetase, beta subunit                     | 100 | 100 | 100 | 95  |
| BMA0219 | glycyl-tRNA synthetase, alpha chain                      | 100 | 100 | 100 | 98  |
| BMA0220 | apolipoprotein N-acyltransferase                         | 100 | 99  | 100 | 93  |
| BMA0221 | magnesium and cobalt efflux protein CorC                 | 100 | 100 | 100 | 98  |
| BMA0222 | ChaC-related protein                                     | 100 | 99  | 100 | 94  |
| BMA0223 | conserved hypothetical protein TIGR00043                 | 100 | 99  | 100 | 92  |
| BMA0225 | PhoH family protein                                      | 100 | 99  | 100 | 96  |
| BMA0226 | tRNA-i(6)A37 modification enzyme MiaB                    | 100 | 100 | 100 | 96  |
| BMA0227 | transcriptional regulator, LysR family                   | 100 | 99  | 100 | 93  |
| BMA0228 | major facilitator family transporter                     | 100 | 99  | 100 | 94  |
| BMA0229 | DNA-binding protein                                      | 100 | 99  | 100 | 95  |
| BMA0230 | 3,4-dihydroxy-2-butanone 4-phosphate synthase            | 100 | 100 | 100 | 95  |
| BMA0231 | HAD-superfamily hydrolase                                | 100 | 100 | 100 | 95  |
| BMA0239 | glycerol uptake facilitator protein                      | 100 | 100 | 100 | 97  |
| BMA0240 | glycerol kinase                                          | 100 | 100 | 100 | 98  |
| BMA0241 | glycerol-3-phosphate dehydrogenase                       | 100 | 99  | 100 | 96  |
| BMA0242 | lipoprotein, putative                                    | 100 | 100 | 100 | 88  |
| BMA0243 | hypothetical protein                                     | 100 | 100 | 100 | 100 |
| BMA0244 | glycerol-3-phosphate regulon repressor                   | 100 | 100 | 100 | 97  |
| BMA0245 | gamma-glutamyltransferase                                | 100 | 99  | 100 | 94  |
| BMA0246 | conserved hypothetical protein                           | 100 | 100 | 100 | 96  |
| BMA0247 | hypothetical protein                                     | 100 | 99  | 100 | 89  |
| BMA0248 | ATP-dependent RNA helicase RhIE                          | 100 | 100 | 100 | 95  |
| BMA0249 | cytochrome c family protein                              | 100 | 100 | 100 | 98  |
| BMA0250 | cytochrome c4, putative                                  | 100 | 100 | 100 | 96  |
| BMA0252 | copper resistance protein, putative                      | 100 | 100 | 100 | 95  |
| BMA0254 | DgoA protein                                             | 100 | 99  | 100 | 97  |
| BMA0259 | Ser/Thr protein phosphatase family protein               | 100 | 99  | 100 | 96  |
| BMA0260 | sensor histidine kinase                                  | 100 | 100 | 100 | 91  |
| BMA0261 | response regulator                                       | 100 | 99  | 100 | 93  |
| BMA0262 | hypothetical protein                                     | 100 | 100 | 100 | 86  |
| BMA0263 | hypothetical protein                                     | 100 | 100 | 100 | 88  |
| BMA0264 | methyl-accepting chemotaxis protein                      | 100 | 99  | 100 | 92  |
| BMA0269 | major facilitator family transporter                     | 100 | 99  | 100 | 97  |
| BMA0270 | sensor histidine kinase                                  | 100 | 96  | 100 | 91  |
| BMA0271 | DNA-binding response regulator                           | 100 | 99  | 100 | 94  |

|           |                                                                                          |     |     |     |     |
|-----------|------------------------------------------------------------------------------------------|-----|-----|-----|-----|
| BMA0272   | recA protein                                                                             | 100 | 100 | 100 | 98  |
| BMA0275   | succinyl-CoA synthase, beta subunit                                                      | 100 | 100 | 100 | 98  |
| BMA0276   | succinyl-CoA synthase, alpha subunit                                                     | 100 | 99  | 100 | 98  |
| BMA0277   | integral membrane protein, TerC family                                                   | 100 | 99  | 100 | 94  |
| BMA0278   | type IV pilin, putative                                                                  | 100 | 99  | 100 | 91  |
| BMA0279   | O-antigen polymerase family protein                                                      | 100 | 99  | 100 | 94  |
| BMA0281   | conserved hypothetical protein                                                           | 100 | 100 | 100 | 89  |
| BMA0282   | TonB domain protein                                                                      | 100 | 98  | 100 | 93  |
| BMA0283   | molybdenum cofactor biosynthesis protein C, c-term                                       | 100 | 100 | 100 | 88  |
| BMA0288   | conserved hypothetical protein                                                           | 100 | 100 | 100 | 93  |
| BMA0289   | hydrolase, alpha/beta fold family                                                        | 100 | 99  | 100 | 96  |
| BMA0290   | conserved hypothetical protein                                                           | 100 | 100 | 100 | 100 |
| BMA0291   | ADP-heptose--LPS heptosyltransferase II                                                  | 100 | 99  | 100 | 98  |
| BMA0292   | conserved hypothetical protein                                                           | 100 | 100 | 100 | 100 |
| BMA0293   | branched-chain amino acid aminotransferase                                               | 100 | 100 | 100 | 99  |
| BMA0294   | AziC family protein                                                                      | 100 | 98  | 100 | 94  |
| BMA0295   | membrane protein, putative                                                               | 100 | 100 | 100 | 95  |
| BMA0295.1 | phosphoglycerate kinase                                                                  | 100 | 99  | 100 | 98  |
| BMA0298   | pyruvate kinase                                                                          | 100 | 100 | 100 | 99  |
| BMA0299   | fructose-bisphosphate aldolase, class II                                                 | 100 | 100 | 100 | 100 |
| BMA0300   | phosphoribosylaminoimidazole-succinocarboxamide synthase                                 | 100 | 100 | 100 | 97  |
| BMA0301   | phosphoribosylaminoimidazole carboxylase, catalytic subunit                              | 100 | 100 | 100 | 97  |
| BMA0302   | phosphoribosylaminoimidazole carboxylase, ATPase subunit                                 | 100 | 99  | 100 | 95  |
| BMA0303   | Sua5/YciO/YrdC/YwC family protein                                                        | 100 | 100 | 100 | 93  |
| BMA0304   | conserved hypothetical protein                                                           | 100 | 99  | 100 | 96  |
| BMA0305   | conserved hypothetical protein, authentic point mutation                                 | 100 | 99  | 100 | 94  |
| BMA0307   | D-alanyl-D-alanine carboxypeptidase/D-alanyl-D-alanine-endopeptidase                     | 100 | 100 | 100 | 95  |
| BMA0308   | DNA-binding response regulator                                                           | 100 | 100 | 100 | 99  |
| BMA0309   | sensor histidine kinase                                                                  | 100 | 99  | 100 | 97  |
| BMA0310   | serine protease                                                                          | 100 | 99  | 100 | 97  |
| BMA0311   | conserved hypothetical protein                                                           | 100 | 98  | 100 | 89  |
| BMA0312   | conserved hypothetical protein                                                           | 100 | 97  | 100 | 93  |
| BMA0313   | conserved hypothetical protein                                                           | 100 | 100 | 100 | 95  |
| BMA0314   | transcriptional regulator, TetR family                                                   | 100 | 99  | 100 | 98  |
| BMA0315   | efflux transporter, RND family, MFP subunit                                              | 100 | 100 | 100 | 95  |
| BMA0316   | hydrophobe/amphiphile efflux family protein                                              | 100 | 99  | 100 | 99  |
| BMA0317   | RND efflux system, outer membrane lipoprotein, NodT family                               | 100 | 99  | 100 | 95  |
| BMA0319   | ISBma1, transposase, authentic point mutation                                            | 100 | 99  | 100 | 98  |
| BMA0320   | xanthine/uracil permease family protein, truncation                                      | 100 | 99  | 100 | 95  |
| BMA0323   | transcriptional regulator, AraC family                                                   | 100 | 99  | 100 | 94  |
| BMA0324   | glutathione-dependent formaldehyde dehydrogenase                                         | 100 | 99  | 100 | 98  |
| BMA0325   | esterase, putative                                                                       | 100 | 99  | 100 | 91  |
| BMA0326   | cation ABC transporter, permease protein, putative                                       | 100 | 100 | 100 | 96  |
| BMA0327   | cation ABC transporter, ATP-binding protein, putative                                    | 100 | 99  | 99  | 94  |
| BMA0328   | cation ABC transporter, periplasmic cation-binding protein, putative                     | 100 | 99  | 100 | 93  |
| BMA0329   | transcriptional regulator, putative                                                      | 100 | 100 | 96  | 93  |
| BMA0330   | oxidoreductase, short-chain dehydrogenase/reductase family                               | 100 | 99  | 100 | 96  |
| BMA0331   | carbohydrate kinase, PfkB family                                                         | 100 | 99  | 100 | 94  |
| BMA0333   | maltose/mannitol ABC transporter, periplasmic maltose/mannitol-binding protein, putative | 100 | 100 | 100 | 95  |

|         |                                                                 |     |     |     |     |
|---------|-----------------------------------------------------------------|-----|-----|-----|-----|
| BMA0334 | maltose/mannitol ABC transporter, permease protein, putative    | 100 | 99  | 100 | 95  |
| BMA0335 | maltose/mannitol ABC transporter, permease protein, putative    | 100 | 99  | 100 | 94  |
| BMA0336 | HAD-superfamily hydrolase                                       | 100 | 98  | 100 | 90  |
| BMA0337 | maltose/mannitol ABC transporter, ATP-binding protein, putative | 100 | 99  | 100 | 95  |
| BMA0338 | conserved hypothetical protein                                  | 100 | 99  | 99  | 88  |
| BMA0342 | transcriptional regulator, putative                             | 100 | 99  | 100 | 96  |
| BMA0343 | xylulokinase                                                    | 100 | 99  | 100 | 93  |
| BMA0344 | mannitol dehydrogenase family protein                           | 100 | 98  | 100 | 93  |
| BMA0345 | transcriptional regulator, LysR family                          | 100 | 97  | 100 | 92  |
| BMA0346 | benzoylformate decarboxylase                                    | 100 | 99  | 100 | 93  |
| BMA0347 | aldehyde dehydrogenase family protein                           | 100 | 100 | 100 | 95  |
| BMA0348 | 2-dehydropantoate 2-reductase                                   | 100 | 99  | 100 | 89  |
| BMA0350 | 4-hydroxybenzoate transporter, putative                         | 100 | 99  | 100 | 94  |
| BMA0351 | tryptophan 2,3-dioxygenase family protein                       | 100 | 99  | 100 | 96  |
| BMA0352 | kynureninase, putative                                          | 100 | 99  | 100 | 96  |
| BMA0353 | cyclase, putative                                               | 100 | 99  | 100 | 93  |
| BMA0354 | transcriptional regulator, AsnC family                          | 100 | 100 | 100 | 97  |
| BMA0355 | flavin reductase domain protein                                 | 100 | 100 | 100 | 97  |
| BMA0356 | peptide methionine sulfoxide reductase                          | 100 | 100 | 100 | 91  |
| BMA0358 | cyclopropane fatty acid synthase family protein                 | 100 | 100 | 100 | 97  |
| BMA0359 | pyridoxamine 5'-phosphate oxidase                               | 100 | 99  | 100 | 95  |
| BMA0360 | HesA/MoeB/ThiF family protein                                   | 100 | 100 | 100 | 96  |
| BMA0362 | conserved hypothetical protein                                  | 100 | 99  | 100 | 93  |
| BMA0363 | membrane protein, putative                                      | 100 | 99  | 100 | 93  |
| BMA0365 | N-acetylmuramoyl-L-alanine amidase                              | 100 | 100 | 100 | 97  |
| BMA0366 | conserved hypothetical protein TIGR00150                        | 100 | 100 | 100 | 94  |
| BMA0367 | iron-sulfur cluster binding protein, putative                   | 100 | 99  | 100 | 95  |
| BMA0368 | methylated-DNA-protein-cysteine methyltransferase               | 100 | 99  | 100 | 91  |
| BMA0369 | tyrosine recombinase XerD                                       | 100 | 99  | 100 | 95  |
| BMA0370 | AMP-binding enzyme domain protein                               | 100 | 99  | 100 | 89  |
| BMA0371 | ebsC protein, putative                                          | 100 | 100 | 100 | 98  |
| BMA0372 | membrane protein, putative                                      | 100 | 99  | 98  | 94  |
| BMA0373 | conserved hypothetical protein                                  | 100 | 100 | 100 | 98  |
| BMA0374 | UDP-N-acetylenolpyruvoylglucosamine reductase                   | 100 | 99  | 100 | 91  |
| BMA0375 | ornithine carbamoyltransferase                                  | 100 | 100 | 100 | 98  |
| BMA0377 | ribosomal protein S20                                           | 100 | 100 | 100 | 100 |
| BMA0378 | integral membrane protein MviN                                  | 100 | 99  | 100 | 97  |
| BMA0380 | 3-hydroxyacyl-CoA dehydrogenase                                 | 100 | 99  | 100 | 97  |
| BMA0382 | thymidylate synthase                                            | 100 | 100 | 100 | 95  |
| BMA0383 | sigma-54 dependent DNA-binding transcriptional regulator        | 100 | 99  | 100 | 96  |
| BMA0387 | dihydrofolate reductase                                         | 100 | 100 | 99  | 95  |
| BMA0389 | pmbA protein                                                    | 100 | 99  | 100 | 98  |
| BMA0390 | conserved hypothetical protein                                  | 100 | 98  | 100 | 91  |
| BMA0391 | molybdopterin biosynthesis mog protein                          | 100 | 99  | 100 | 96  |
| BMA0392 | oligoribonuclease                                               | 100 | 99  | 100 | 96  |
| BMA0393 | peptidase, M48 family                                           | 100 | 99  | 100 | 96  |
| BMA0394 | conserved hypothetical protein TIGR00157                        | 100 | 98  | 100 | 94  |
| BMA0395 | lipoprotein, putative                                           | 100 | 100 | 100 | 90  |
| BMA0396 | CobD/CbiB family protein, putative                              | 100 | 100 | 100 | 97  |

|           |                                                                        |     |     |     |     |
|-----------|------------------------------------------------------------------------|-----|-----|-----|-----|
| BMA0397   | pyrophosphatase, MutT/nudix family                                     | 100 | 100 | 100 | 92  |
| BMA0400   | ribosomal protein L19                                                  | 100 | 100 | 100 | 100 |
| BMA0401   | tRNA (guanine-N1)-methyltransferase                                    | 100 | 100 | 100 | 98  |
| BMA0402   | 16S rRNA processing protein RimM                                       | 100 | 98  | 100 | 92  |
| BMA0403   | ribosomal protein S16                                                  | 100 | 100 | 100 | 100 |
| BMA0404   | L-sorbose dehydrogenase, authentic point mutation                      | 100 | 99  | 100 | 91  |
| BMA0406   | radical SAM domain protein                                             | 100 | 99  | 100 | 92  |
| BMA0407   | leucine-responsive regulatory protein                                  | 100 | 99  | 100 | 99  |
| BMA0408   | D-amino acid dehydrogenase, small subunit                              | 100 | 99  | 100 | 97  |
| BMA0410   | electron transfer flavoprotein, alpha subunit                          | 100 | 100 | 100 | 99  |
| BMA0411   | electron transfer flavoprotein, beta subunit                           | 100 | 100 | 100 | 100 |
| BMA0412   | D-methionine ABC transporter, periplasmic D-methionine-binding protein | 100 | 98  | 100 | 91  |
| BMA0413   | D-methionine ABC transporter, permease protein                         | 100 | 99  | 100 | 99  |
| BMA0414   | D-methionine ABC transporter, ATP-binding protein                      | 100 | 100 | 100 | 98  |
| BMA0415   | hydrolase, alpha/beta fold family                                      | 100 | 98  | 100 | 86  |
| BMA0416   | histone deacetylase family protein                                     | 100 | 99  | 100 | 99  |
| BMA0418   | cysteine synthase B                                                    | 100 | 99  | 100 | 97  |
| BMA0420   | competence protein ComE                                                | 100 | 100 | 100 | 94  |
| BMA0421   | ADP-L-glycero-D-mannoheptose-6-epimerase                               | 100 | 99  | 100 | 97  |
| BMA0422   | ADP-heptose synthase                                                   | 100 | 99  | 99  | 97  |
| BMA0423   | UDP-glucose 6-dehydrogenase                                            | 100 | 99  | 100 | 97  |
| BMA0424   | TPR domain protein                                                     | 100 | 100 | 100 | 97  |
| BMA0427   | integration host factor, beta subunit                                  | 100 | 100 | 100 | 99  |
| BMA0428   | ribosomal protein S1                                                   | 100 | 100 | 100 | 100 |
| BMA0429   | cytidylate kinase                                                      | 100 | 99  | 100 | 97  |
| BMA0430   | prephenate dehydrogenase/3-phosphoshikimate 1-carboxyvinyltransferase  | 100 | 99  | 100 | 97  |
| BMA0432   | chorismate mutase/prephenate dehydratase                               | 100 | 100 | 100 | 98  |
| BMA0433   | phosphoserine aminotransferase                                         | 100 | 100 | 97  | 95  |
| BMA0434   | conserved hypothetical protein                                         | 100 | 100 | 100 | 98  |
| BMA0435   | DNA gyrase, A subunit                                                  | 100 | 99  | 100 | 98  |
| BMA0436   | OmpA family protein                                                    | 100 | 100 | 100 | 98  |
| BMA0437   | 3-demethylubiquinone-9 3-methyltransferase                             | 100 | 100 | 99  | 97  |
| BMA0438   | phosphoglycolate phosphatase                                           | 100 | 98  | 100 | 94  |
| BMA0443   | ISBma1, transposase, truncation                                        | 100 | 98  | 100 | 98  |
| BMA0444   | conserved hypothetical protein                                         | 100 | 99  | 100 | 95  |
| BMA0444.1 | hypothetical protein                                                   | 100 | 100 | 100 | 98  |
| BMA0446   | molybdate transport repressor domain protein                           | 100 | 99  | 100 | 92  |
| BMA0448   | formate dehydrogenase, gamma subunit                                   | 100 | 100 | 100 | 94  |
| BMA0449   | formate dehydrogenase, beta subunit                                    | 100 | 100 | 100 | 93  |
| BMA0450   | formate dehydrogenase, alpha subunit                                   | 100 | 99  | 100 | 96  |
| BMA0451   | formate dehydrogenase, delta subunit                                   | 100 | 100 | 100 | 93  |
| BMA0452   | pentachlorophenol 4-monooxygenase, putative                            | 100 | 99  | 100 | 93  |
| BMA0453   | TPR domain protein                                                     | 100 | 99  | 100 | 92  |
| BMA0454   | citrate-proten symporter                                               | 100 | 99  | 100 | 98  |
| BMA0455   | glutamine amidotransferase, class I                                    | 100 | 99  | 100 | 91  |
| BMA0457   | amidase family protein                                                 | 100 | 100 | 100 | 95  |
| BMA0458   | disulfide bond formation protein DsbB                                  | 100 | 100 | 100 | 95  |
| BMA0460   | xanthine dehydrogenase accessory protein XdhC, putative                | 100 | 100 | 99  | 94  |
| BMA0461   | adenosine deaminase                                                    | 100 | 99  | 100 | 94  |

|         |                                                                         |     |     |     |     |
|---------|-------------------------------------------------------------------------|-----|-----|-----|-----|
| BMA0462 | xanthine/uracil permease family protein                                 | 100 | 100 | 100 | 97  |
| BMA0463 | guanine deaminase                                                       | 100 | 99  | 100 | 94  |
| BMA0464 | membrane protein, putative                                              | 100 | 99  | 100 | 95  |
| BMA0465 | lipoprotein, putative                                                   | 100 | 100 | 100 | 94  |
| BMA0466 | aminopeptidase N                                                        | 100 | 99  | 100 | 95  |
| BMA0467 | 5-methyltetrahydropteroyltriglutamate--homocysteine S-methyltransferase | 100 | 99  | 100 | 94  |
| BMA0468 | transcriptional regulator MetR                                          | 100 | 100 | 100 | 98  |
| BMA0469 | fructose-1,6-bisphosphatase                                             | 100 | 100 | 100 | 98  |
| BMA0470 | ISBma1, transposase                                                     | 100 | 98  | 100 | 98  |
| BMA0474 | hypothetical protein                                                    | 100 | 100 | 100 | 100 |
| BMA0476 | conserved hypothetical protein                                          | 100 | 99  | 99  | 91  |
| BMA0477 | TonB-dependent receptor                                                 | 100 | 99  | 100 | 94  |
| BMA0478 | conserved hypothetical protein                                          | 100 | 99  | 100 | 87  |
| BMA0480 | chorismate mutase                                                       | 100 | 98  | 100 | 90  |
| BMA0486 | isocitrate dehydrogenase, NADP-dependent                                | 100 | 100 | 100 | 98  |
| BMA0487 | multicopper oxidase domain protein                                      | 100 | 98  | 100 | 88  |
| BMA0489 | conserved hypothetical protein, authentic point mutation                | 100 | 98  | 100 | 87  |
| BMA0490 | transcriptional regulator, ArsR family                                  | 100 | 100 | 100 | 91  |
| BMA0492 | thioesterase family protein                                             | 100 | 100 | 100 | 98  |
| BMA0493 | fumarate hydratase, class II                                            | 100 | 99  | 100 | 97  |
| BMA0502 | multidrug resistance protein NorM, putative                             | 100 | 99  | 100 | 97  |
| BMA0503 | conserved hypothetical protein                                          | 100 | 100 | 100 | 98  |
| BMA0506 | creA protein                                                            | 100 | 100 | 100 | 96  |
| BMA0509 | ferredoxin                                                              | 100 | 99  | 100 | 95  |
| BMA0510 | nicotinate phosphoribosyltransferase                                    | 100 | 100 | 100 | 97  |
| BMA0511 | conserved hypothetical protein                                          | 100 | 100 | 100 | 95  |
| BMA0512 | membrane protein, putative                                              | 100 | 99  | 99  | 97  |
| BMA0513 | glyoxylate reductase                                                    | 100 | 100 | 99  | 96  |
| BMA0514 | rmuC domain protein                                                     | 100 | 99  | 100 | 96  |
| BMA0515 | acetyltransferase, GNAT family                                          | 100 | 99  | 100 | 92  |
| BMA0516 | membrane protein, putative                                              | 100 | 100 | 100 | 100 |
| BMA0517 | molybdopterin biosynthesis moeA protein                                 | 100 | 98  | 100 | 89  |
| BMA0518 | molybdopterin-guanine dinucleotide biosynthesis protein                 | 100 | 99  | 100 | 90  |
| BMA0519 | molybdenum cofactor biosynthesis protein A                              | 100 | 99  | 100 | 95  |
| BMA0521 | ribosomal large subunit pseudouridine synthase C                        | 100 | 100 | 100 | 98  |
| BMA0523 | iron-sulfur cluster-binding protein, Rieske family                      | 100 | 100 | 100 | 93  |
| BMA0524 | peptidase, U7 family protein                                            | 100 | 100 | 100 | 97  |
| BMA0525 | tetrapyrrole methylase family protein                                   | 100 | 99  | 100 | 98  |
| BMA0526 | Maf family protein                                                      | 100 | 100 | 100 | 91  |
| BMA0527 | conserved hypothetical protein                                          | 100 | 100 | 100 | 94  |
| BMA0528 | ribosomal protein L32                                                   | 100 | 100 | 100 | 96  |
| BMA0529 | fatty acid/phospholipid synthesis protein PlsX                          | 100 | 100 | 100 | 98  |
| BMA0530 | 3-oxoacyl-(acyl-carrier-protein) synthase III                           | 100 | 99  | 100 | 96  |
| BMA0531 | malonyl CoA-acyl carrier protein transacylase                           | 100 | 100 | 100 | 96  |
| BMA0532 | 3-oxoacyl-(acyl-carrier-protein) reductase                              | 100 | 100 | 100 | 96  |
| BMA0533 | acyl carrier protein                                                    | 100 | 100 | 100 | 100 |
| BMA0534 | 3-oxoacyl-(acyl-carrier-protein) synthase II                            | 100 | 99  | 100 | 96  |
| BMA0536 | RNA polymerase sigma-H factor                                           | 100 | 99  | 100 | 98  |
| BMA0537 | sigma factor algU regulatory protein MucA, putative                     | 100 | 99  | 100 | 94  |



|         |                                                                              |     |     |     |    |
|---------|------------------------------------------------------------------------------|-----|-----|-----|----|
| BMA0538 | sigma factor algU regulatory protein MucB                                    | 100 | 99  | 100 | 95 |
| BMA0539 | serine protease, MucD                                                        | 100 | 99  | 100 | 96 |
| BMA0540 | conserved hypothetical protein                                               | 100 | 97  | 98  | 95 |
| BMA0541 | GTP-binding protein LepA                                                     | 100 | 100 | 100 | 99 |
| BMA0542 | signal peptidase I                                                           | 100 | 100 | 100 | 97 |
| BMA0544 | GTP-binding protein Era                                                      | 100 | 100 | 100 | 98 |
| BMA0545 | Recombination protein O                                                      | 100 | 99  | 100 | 95 |
| BMA0546 | pyridoxal phosphate biosynthetic protein PdxJ                                | 100 | 99  | 100 | 97 |
| BMA0547 | holo-(acyl-carrier-protein) synthase                                         | 100 | 100 | 100 | 97 |
| BMA0548 | glycosyl hydrolase, family 3                                                 | 100 | 99  | 100 | 93 |
| BMA0549 | sigma-54 dependent DNA-binding response regulator                            | 100 | 100 | 100 | 97 |
| BMA0550 | translation elongation factor P                                              | 100 | 100 | 100 | 96 |
| BMA0551 | conserved hypothetical protein                                               | 100 | 98  | 98  | 92 |
| BMA0552 | excinuclease ABC, C subunit                                                  | 100 | 99  | 100 | 91 |
| BMA0553 | CDP-diacylglycerol-glycerol-3-phosphate 3-phosphatidyltransferase            | 100 | 100 | 100 | 99 |
| BMA0558 | conserved hypothetical protein                                               | 100 | 100 | 100 | 97 |
| BMA0559 | transcriptional regulator, LysR family                                       | 100 | 100 | 100 | 93 |
| BMA0560 | conserved hypothetical protein                                               | 100 | 100 | 100 | 96 |
| BMA0561 | acetyltransferase, GNAT family                                               | 100 | 99  | 100 | 88 |
| BMA0562 | membrane protein, putative                                                   | 100 | 99  | 100 | 98 |
| BMA0563 | conserved hypothetical protein                                               | 100 | 100 | 100 | 97 |
| BMA0564 | SCO1/SenC family protein                                                     | 100 | 100 | 100 | 91 |
| BMA0565 | trehalose-phosphatase                                                        | 100 | 98  | 100 | 91 |
| BMA0566 | alpha,alpha-trehalose-phosphate synthase                                     | 100 | 99  | 100 | 96 |
| BMA0567 | ABC transporter, permease/ATP-binding protein                                | 100 | 99  | 100 | 96 |
| BMA0568 | glycosyl transferase, group 1 family protein                                 | 100 | 100 | 100 | 99 |
| BMA0571 | oxidoreductase, FAD-binding family protein                                   | 100 | 99  | 100 | 92 |
| BMA0572 | amino acid ABC transporter, periplasmic amino acid-binding protein, putative | 100 | 100 | 100 | 96 |
| BMA0575 | hypothetical protein                                                         | 100 | 99  | 100 | 96 |
| BMA0576 | YdjC-like family protein                                                     | 100 | 98  | 100 | 95 |
| BMA0577 | radical SAM domain protein                                                   | 100 | 100 | 100 | 99 |
| BMA0578 | syl transferase, group 2 family protein                                      | 100 | 99  | 100 | 97 |
| BMA0580 | luciferase-like monooxygenase                                                | 100 | 99  | 99  | 96 |
| BMA0581 | hydrolase, alpha/beta fold family                                            | 100 | 99  | 99  | 90 |
| BMA0582 | pyridoxal kinase                                                             | 100 | 99  | 100 | 97 |
| BMA0584 | phospholipase C                                                              | 100 | 99  | 100 | 97 |
| BMA0588 | arginine/ornithine ABC transporter, permease protein, putative               | 100 | 99  | 100 | 96 |
| BMA0589 | arginine/ornithine ABC transporter, ATP-binding protein, putative            | 100 | 99  | 100 | 96 |
| BMA0590 | transcriptional regulator, AraC family                                       | 100 | 99  | 100 | 98 |
| BMA0591 | succinylornithine transaminase                                               | 100 | 100 | 100 | 97 |
| BMA0592 | arginine N-succinyltransferase, alpha chain                                  | 100 | 98  | 100 | 96 |
| BMA0593 | arginine N-succinyltransferase, beta chain                                   | 100 | 99  | 100 | 95 |
| BMA0594 | succinylglutamate 5-semialdehyde dehydrogenase                               | 100 | 99  | 100 | 93 |
| BMA0595 | succinylarginine dihydrolase                                                 | 100 | 100 | 100 | 95 |
| BMA0596 | succinylglutamate desuccinylase                                              | 100 | 99  | 100 | 90 |
| BMA0598 | amino acid ABC transporter, periplasmic amino acid-binding protein           | 100 | 100 | 100 | 99 |
| BMA0599 | fatty acid desaturase domain protein                                         | 100 | 99  | 100 | 94 |
| BMA0600 | ubiquinol oxidase, subunit IV                                                | 100 | 100 | 100 | 97 |
| BMA0603 | ubiquinol oxidase, subunit II                                                | 100 | 98  | 100 | 96 |

|         |                                                            |     |     |     |    |
|---------|------------------------------------------------------------|-----|-----|-----|----|
| BMA0606 | Rrf2 family protein                                        | 100 | 98  | 99  | 95 |
| BMA0607 | conserved hypothetical protein                             | 100 | 98  | 100 | 90 |
| BMA0608 | conserved hypothetical protein                             | 100 | 98  | 100 | 87 |
| BMA0609 | NifU-like domain protein                                   | 100 | 100 | 100 | 87 |
| BMA0610 | cysteine desulfurase SufS                                  | 100 | 99  | 100 | 91 |
| BMA0614 | membrane protein, putative                                 | 100 | 99  | 100 | 93 |
| BMA0617 | methyl-accepting chemotaxis protein, putative              | 100 | 99  | 100 | 91 |
| BMA0618 | oxygen-independent coproporphyrinogen III oxidase          | 100 | 99  | 100 | 95 |
| BMA0619 | cyclic nucleotide-binding domain protein                   | 100 | 100 | 100 | 99 |
| BMA0620 | membrane protein, putative                                 | 100 | 99  | 100 | 86 |
| BMA0622 | conserved hypothetical protein                             | 100 | 99  | 100 | 95 |
| BMA0623 | peptidase, U32 family                                      | 100 | 99  | 100 | 97 |
| BMA0624 | conserved hypothetical protein                             | 100 | 98  | 100 | 96 |
| BMA0625 | conserved hypothetical protein                             | 99  | 100 | 98  | 90 |
| BMA0626 | conserved hypothetical protein                             | 100 | 99  | 100 | 88 |
| BMA0627 | radical SAM domain protein                                 | 100 | 100 | 100 | 93 |
| BMA0629 | anaerobic ribonucleoside-triphosphate reductase            | 100 | 100 | 100 | 98 |
| BMA0630 | membrane protein, putative                                 | 100 | 99  | 100 | 89 |
| BMA0631 | membrane protein, putative                                 | 98  | 99  | 97  | 89 |
| BMA0633 | nitric oxide reductase norZ, putative                      | 100 | 99  | 100 | 96 |
| BMA0635 | alkane-1 monooxygenase                                     | 100 | 99  | 100 | 95 |
| BMA0636 | deoxyribodipyrimidine photolyase                           | 100 | 99  | 99  | 87 |
| BMA0637 | adenylsulfate kinase                                       | 100 | 100 | 96  | 88 |
| BMA0641 | autoinducer-binding transcriptional regulator, LuxR family | 100 | 99  | 100 | 97 |
| BMA0643 | conserved hypothetical protein                             | 100 | 98  | 100 | 90 |
| BMA0645 | histidine ammonia-lyase                                    | 100 | 99  | 97  | 97 |
| BMA0646 | histidine utilization repressor                            | 100 | 100 | 100 | 96 |
| BMA0647 | urocanate hydratase                                        | 100 | 100 | 100 | 95 |
| BMA0649 | imidazolonepropionase                                      | 100 | 99  | 100 | 96 |
| BMA0650 | formiminoglutamate deiminase                               | 100 | 99  | 100 | 94 |
| BMA0652 | N-formylglutamate amidohydrolase                           | 100 | 97  | 100 | 92 |
| BMA0655 | glutamine amidotransferase, class I                        | 100 | 98  | 100 | 90 |
| BMA0656 | glutamine synthetase family protein                        | 100 | 99  | 100 | 98 |
| BMA0657 | aminotransferase, class III, truncation                    | 100 | 97  | 99  | 93 |
| BMA0662 | cys regulon transcriptional activator                      | 100 | 100 | 100 | 98 |
| BMA0663 | sulfite reductase (NADPH) hemoprotein beta-component       | 100 | 100 | 100 | 98 |
| BMA0664 | conserved hypothetical protein                             | 100 | 100 | 100 | 90 |
| BMA0665 | phosphoadenosine phosphosulfate reductase, putative        | 100 | 100 | 100 | 90 |
| BMA0666 | sulfate adenyltransferase, subunit 2                       | 100 | 100 | 100 | 98 |
| BMA0667 | sulfate adenyltransferase, subunit 1                       | 100 | 99  | 100 | 96 |
| BMA0668 | uroporphyrin-III C-methyltransferase                       | 100 | 100 | 100 | 92 |
| BMA0669 | cbiX protein                                               | 100 | 99  | 98  | 88 |
| BMA0670 | membrane protein, putative                                 | 100 | 99  | 100 | 98 |
| BMA0671 | permease, putative                                         | 100 | 100 | 100 | 98 |
| BMA0672 | cytosol aminopeptidase                                     | 100 | 99  | 100 | 96 |
| BMA0673 | DNA polymerase III, chi subunit, putative                  | 100 | 99  | 100 | 98 |
| BMA0675 | cytochrome c family protein                                | 100 | 100 | 100 | 93 |
| BMA0677 | dihydroxy-acid dehydratase                                 | 100 | 100 | 100 | 97 |
| BMA0678 | isoleucine biosynthesis transcriptional activator          | 97  | 99  | 100 | 93 |

|         |                                                                                  |     |     |     |     |
|---------|----------------------------------------------------------------------------------|-----|-----|-----|-----|
| BMA0679 | prolipoprotein diacylglycerol transferase                                        | 100 | 100 | 100 | 98  |
| BMA0680 | conserved hypothetical protein                                                   | 100 | 100 | 100 | 94  |
| BMA0681 | conserved hypothetical protein                                                   | 100 | 100 | 100 | 95  |
| BMA0682 | conserved hypothetical protein                                                   | 100 | 100 | 100 | 99  |
| BMA0683 | conserved hypothetical protein                                                   | 100 | 100 | 100 | 96  |
| BMA0685 | vitamin B12 receptor BtuB, putative                                              | 100 | 99  | 100 | 86  |
| BMA0686 | iron compound ABC transporter, permease protein                                  | 100 | 100 | 100 | 95  |
| BMA0687 | iron compound ABC transporter, ATP-binding protein                               | 100 | 100 | 99  | 91  |
| BMA0688 | nicotinate-nucleotide--dimethylbenzimidazole phosphoribosyltransferase           | 100 | 100 | 99  | 95  |
| BMA0689 | cobalamin-5-phosphate synthase                                                   | 100 | 100 | 100 | 96  |
| BMA0693 | vitamin B12 transport protein BtuF, putative                                     | 100 | 99  | 100 | 89  |
| BMA0694 | alpha-ribazole-5'-phosphate phosphatase                                          | 100 | 99  | 100 | 90  |
| BMA0695 | cobalamin biosynthesis protein CobD                                              | 100 | 97  | 100 | 92  |
| BMA0696 | cobinamide kinase / cobinamide phosphate guanylyltransferase                     | 100 | 99  | 100 | 94  |
| BMA0697 | cobyric acid synthase CobQ                                                       | 100 | 99  | 100 | 93  |
| BMA0698 | DoxD-like family protein                                                         | 100 | 100 | 100 | 92  |
| BMA0699 | ParA family protein                                                              | 100 | 100 | 100 | 98  |
| BMA0700 | aspartate 1-decarboxylase                                                        | 100 | 100 | 100 | 97  |
| BMA0701 | pantoate--beta-alanine ligase                                                    | 100 | 100 | 100 | 94  |
| BMA0703 | segregation and condensation protein A                                           | 100 | 99  | 100 | 98  |
| BMA0704 | conserved hypothetical protein                                                   | 100 | 100 | 100 | 95  |
| BMA0705 | outer membrane protein, OMP85 family                                             | 100 | 99  | 100 | 93  |
| BMA0706 | conserved hypothetical protein                                                   | 100 | 99  | 100 | 92  |
| BMA0708 | O-methyltransferase family protein                                               | 100 | 99  | 100 | 88  |
| BMA0709 | methionyl-tRNA synthetase                                                        | 100 | 99  | 100 | 93  |
| BMA0711 | ompA family protein                                                              | 100 | 100 | 100 | 99  |
| BMA0712 | ParA family protein                                                              | 100 | 100 | 100 | 97  |
| BMA0713 | superoxide dismutase, Cu-Zn                                                      | 100 | 99  | 100 | 96  |
| BMA0714 | deoxycytidine triphosphate deaminase, putative                                   | 100 | 100 | 100 | 99  |
| BMA0715 | Orn/Lys/Arg decarboxylase                                                        | 100 | 100 | 100 | 99  |
| BMA0716 | hypothetical protein                                                             | 100 | 100 | 100 | 95  |
| BMA0717 | HAD-superfamily hydrolase                                                        | 100 | 100 | 99  | 90  |
| BMA0718 | argininosuccinate lyase                                                          | 100 | 100 | 100 | 98  |
| BMA0719 | fimbrial usher protein                                                           | 100 | 99  | 100 | 90  |
| BMA0722 | conserved hypothetical protein                                                   | 100 | 99  | 100 | 87  |
| BMA0723 | conserved hypothetical protein                                                   | 100 | 100 | 100 | 90  |
| BMA0725 | conserved hypothetical protein                                                   | 100 | 99  | 100 | 96  |
| BMA0726 | methylytransferase, UbiE/COQ5 family                                             | 100 | 98  | 100 | 92  |
| BMA0729 | phosphoenolpyruvate carboxylase                                                  | 100 | 99  | 100 | 96  |
| BMA0730 | porphobilinogen deaminase                                                        | 100 | 100 | 100 | 96  |
| BMA0731 | uroporphyrinogen-III synthase HemD/uroporphyrinogen III methylase HemX, putative | 100 | 99  | 100 | 95  |
| BMA0732 | conserved hypothetical protein                                                   | 100 | 99  | 100 | 97  |
| BMA0733 | major facilitator family transporter                                             | 100 | 99  | 100 | 95  |
| BMA0734 | oxidoreductase, short-chain dehydrogenase/reductase family                       | 100 | 100 | 100 | 93  |
| BMA0735 | aldehyde dehydrogenase family protein                                            | 100 | 100 | 100 | 95  |
| BMA0736 | inorganic pyrophosphatase                                                        | 100 | 99  | 100 | 98  |
| BMA0741 | glutamine dependent NAD+ synthetase                                              | 100 | 99  | 100 | 95  |
| BMA0742 | nitrogen regulatory protein P-II                                                 | 100 | 100 | 100 | 100 |
| BMA0743 | outer membrane porin, putative                                                   | 100 | 100 | 100 | 97  |

|         |                                                                    |     |     |     |     |
|---------|--------------------------------------------------------------------|-----|-----|-----|-----|
| BMA0744 | amino acid ABC transporter, ATP-binding protein                    | 100 | 100 | 100 | 96  |
| BMA0745 | amino acid ABC transporter, permease protein                       | 100 | 100 | 100 | 99  |
| BMA0746 | amino acid ABC transporter, permease protein                       | 100 | 99  | 100 | 97  |
| BMA0747 | amino acid ABC transporter, periplasmic amino acid-binding protein | 100 | 100 | 100 | 97  |
| BMA0749 | hypothetical protein                                               | 100 | 100 | 100 | 92  |
| BMA0750 | DNA-binding response regulator OmpR                                | 100 | 95  | 100 | 94  |
| BMA0751 | osmolarity sensor protein EnvZ, putative                           | 100 | 99  | 100 | 94  |
| BMA0752 | hypothetical protein                                               | 100 | 100 | 100 | 97  |
| BMA0754 | ABC transporter, permease protein                                  | 100 | 100 | 100 | 98  |
| BMA0755 | ABC transporter, ATP-binding protein                               | 100 | 100 | 100 | 99  |
| BMA0759 | glutathione S-transferase domain protein                           | 100 | 98  | 100 | 95  |
| BMA0760 | proline/betaine transporter                                        | 100 | 99  | 100 | 97  |
| BMA0761 | conserved hypothetical protein                                     | 100 | 100 | 100 | 98  |
| BMA0762 | DNA polymerase III, epsilon subunit                                | 100 | 100 | 98  | 94  |
| BMA0763 | ribonuclease HI                                                    | 100 | 100 | 100 | 98  |
| BMA0764 | conserved hypothetical protein                                     | 100 | 100 | 100 | 99  |
| BMA0765 | hydroxyacylglutathione hydrolase                                   | 100 | 99  | 100 | 94  |
| BMA0766 | membrane-bound lytic murein transglycosylase D, putative           | 100 | 99  | 100 | 96  |
| BMA0768 | hypothetical protein                                               | 100 | 97  | 100 | 88  |
| BMA0769 | transcriptional regulator, AraC family                             | 100 | 98  | 100 | 88  |
| BMA0770 | carbamoyl-phosphate synthase, small subunit                        | 100 | 99  | 100 | 97  |
| BMA0771 | homoserine/threonine efflux protein, putative                      | 100 | 100 | 100 | 98  |
| BMA0772 | carbamoyl-phosphate synthase, large subunit                        | 100 | 100 | 100 | 98  |
| BMA0773 | transcription elongation factor GreA                               | 100 | 100 | 100 | 93  |
| BMA0774 | membrane protein, putative                                         | 100 | 99  | 100 | 91  |
| BMA0775 | conserved hypothetical protein                                     | 100 | 100 | 100 | 96  |
| BMA0776 | ribosomal RNA large subunit methyltransferase J                    | 100 | 100 | 100 | 97  |
| BMA0777 | cell division protein FtsH                                         | 100 | 99  | 100 | 99  |
| BMA0778 | dihydropteroate synthase                                           | 100 | 99  | 100 | 92  |
| BMA0779 | phosphoglucosamine mutase                                          | 100 | 99  | 100 | 97  |
| BMA0780 | phosphate ABC transporter, periplasmic phosphate-binding protein   | 100 | 100 | 100 | 97  |
| BMA0781 | phosphate ABC transporter, permease protein                        | 100 | 100 | 100 | 97  |
| BMA0782 | phosphate ABC transporter, permease protein                        | 100 | 99  | 100 | 96  |
| BMA0783 | phosphate ABC transporter, ATP-binding protein                     | 100 | 100 | 100 | 99  |
| BMA0784 | phosphate transport system regulatory protein PhoU                 | 100 | 100 | 100 | 98  |
| BMA0785 | DNA-binding response regulator PhoB                                | 100 | 100 | 100 | 100 |
| BMA0786 | histidine protein kinase PhoR                                      | 100 | 100 | 100 | 98  |
| BMA0788 | polyphosphate kinase                                               | 100 | 99  | 100 | 98  |
| BMA0789 | exopolyphosphatase                                                 | 100 | 99  | 100 | 98  |
| BMA0791 | conserved hypothetical protein                                     | 100 | 99  | 100 | 91  |
| BMA0796 | phosphohistidine phosphatase SixA                                  | 100 | 99  | 100 | 94  |
| BMA0797 | conserved hypothetical protein                                     | 100 | 100 | 100 | 99  |
| BMA0798 | hypothetical protein                                               | 100 | 98  | 97  | 94  |
| BMA0799 | lipoprotein, putative                                              | 100 | 98  | 100 | 88  |
| BMA0800 | DNA-damage-inducible protein F, truncation                         | 100 | 99  | 100 | 93  |
| BMA0802 | acetyl-coenzyme A synthetase                                       | 100 | 99  | 100 | 92  |
| BMA0803 | lipoprotein NlpD, putative                                         | 100 | 100 | 100 | 91  |
| BMA0804 | conserved hypothetical protein, truncation                         | 100 | 99  | 100 | 89  |
| BMA0807 | conserved domain protein                                           | 100 | 96  | 100 | 97  |

|           |                                                                          |     |     |     |     |
|-----------|--------------------------------------------------------------------------|-----|-----|-----|-----|
| BMA0809   | conserved hypothetical protein                                           | 100 | 97  | 100 | 95  |
| BMA0811   | transcriptional regulator, MerR family                                   | 100 | 99  | 100 | 86  |
| BMA0824   | poly(3-hydroxybutyrate) depolymerase                                     | 100 | 99  | 100 | 87  |
| BMA0852   | conserved hypothetical protein                                           | 100 | 99  | 100 | 93  |
| BMA0854   | conserved hypothetical protein                                           | 100 | 100 | 100 | 97  |
| BMA0855   | Rhs element Vgr protein                                                  | 100 | 99  | 100 | 93  |
| BMA0856   | conserved hypothetical protein                                           | 100 | 99  | 100 | 90  |
| BMA0863   | lipoprotein, putative                                                    | 100 | 99  | 100 | 88  |
| BMA0864   | H-NS histone family protein                                              | 100 | 100 | 100 | 98  |
| BMA0866   | hydrolase                                                                | 100 | 98  | 99  | 88  |
| BMA0867   | major facilitator family transporter, authentic point mutation           | 100 | 99  | 100 | 92  |
| BMA0870   | transcriptional regulator, LysR family                                   | 100 | 100 | 100 | 98  |
| BMA0873   | conserved hypothetical protein                                           | 100 | 99  | 100 | 95  |
| BMA0874   | conserved hypothetical protein                                           | 100 | 100 | 100 | 92  |
| BMA0875   | fimbrial assembly chaperone, putative                                    | 100 | 99  | 100 | 88  |
| BMA0877   | conserved hypothetical protein                                           | 100 | 99  | 100 | 93  |
| BMA0878   | sensor histidine kinase/response regulator                               | 100 | 99  | 100 | 89  |
| BMA0879   | DNA-binding response regulator                                           | 100 | 100 | 100 | 95  |
| BMA0885   | conserved hypothetical protein                                           | 100 | 99  | 100 | 93  |
| BMA0886   | acid phosphatase AcpA, putative                                          | 100 | 100 | 100 | 95  |
| BMA0887   | di-haem cytochrome c peroxidase family protein                           | 100 | 99  | 99  | 95  |
| BMA0888   | conserved hypothetical protein                                           | 100 | 98  | 100 | 86  |
| BMA0890   | hypothetical protein                                                     | 100 | 100 | 100 | 91  |
| BMA0891   | NUDIX domain protein                                                     | 100 | 98  | 98  | 90  |
| BMA0892   | glutaminyl-tRNA synthetase                                               | 100 | 100 | 100 | 97  |
| BMA0892.1 | hypothetical protein                                                     | 100 | 100 | 100 | 94  |
| BMA0895   | alanyl-tRNA synthetase                                                   | 100 | 99  | 100 | 98  |
| BMA0896   | transcriptional regulator, LysR family                                   | 100 | 100 | 100 | 96  |
| BMA0900   | membrane protein, putative, truncation                                   | 100 | 97  | 100 | 89  |
| BMA0903   | pyrophosphatase, MutT/nudix family                                       | 100 | 100 | 100 | 91  |
| BMA0904   | conserved hypothetical protein                                           | 100 | 100 | 100 | 97  |
| BMA0905   | alcohol dehydrogenase, iron-containing family protein                    | 100 | 99  | 100 | 96  |
| BMA0906   | thioesterase family protein                                              | 100 | 100 | 100 | 97  |
| BMA0907   | branched-chain amino acid ABC transporter, permease protein, putative    | 100 | 99  | 100 | 91  |
| BMA0909   | branched-chain amino acid ABC transporter, ATP-binding protein, putative | 100 | 99  | 100 | 93  |
| BMA0910   | iolB protein                                                             | 100 | 99  | 100 | 94  |
| BMA0911   | iolE protein                                                             | 100 | 100 | 100 | 97  |
| BMA0912   | iolD protein                                                             | 100 | 99  | 100 | 93  |
| BMA0913   | iolC protein                                                             | 100 | 100 | 100 | 96  |
| BMA0914   | sugar ABC transporter, ATP-binding protein, putative                     | 100 | 100 | 100 | 97  |
| BMA0915   | sugar ABC transporter, permease protein, putative                        | 100 | 100 | 100 | 98  |
| BMA0916   | sugar ABC transporter, periplasmic sugar-binding protein, putative       | 100 | 100 | 100 | 97  |
| BMA0918   | myo-inositol dehydrogenase                                               | 100 | 100 | 100 | 93  |
| BMA0919   | myo-inositol dehydrogenase                                               | 100 | 99  | 100 | 96  |
| BMA0920   | conserved hypothetical protein                                           | 100 | 100 | 100 | 100 |
| BMA0920.1 | hypothetical protein                                                     | 100 | 100 | 100 | 89  |
| BMA0922   | DNA-binding response regulator                                           | 100 | 100 | 100 | 100 |
| BMA0923   | LysM domain protein                                                      | 100 | 99  | 100 | 92  |
| BMA0924   | sensor histidine kinase                                                  | 100 | 99  | 100 | 96  |

|           |                                                                      |     |     |     |    |
|-----------|----------------------------------------------------------------------|-----|-----|-----|----|
| BMA0925   | lipoprotein, putative                                                | 100 | 100 | 100 | 90 |
| BMA0926   | UTP-glucose-1-phosphate uridylyltransferase                          | 100 | 100 | 100 | 98 |
| BMA0927   | valyl-tRNA synthetase                                                | 100 | 99  | 100 | 97 |
| BMA0928   | DNA helicase II                                                      | 100 | 99  | 100 | 98 |
| BMA0929   | MTA/SAH nucleosidase                                                 | 100 | 100 | 100 | 93 |
| BMA0930   | fosmidomycin resistance protein                                      | 100 | 100 | 100 | 96 |
| BMA0932   | conserved hypothetical protein                                       | 100 | 99  | 100 | 95 |
| BMA0933   | membrane protein, putative                                           | 100 | 100 | 100 | 98 |
| BMA0934   | fusaric acid resistance protein, putative                            | 100 | 99  | 100 | 96 |
| BMA0936   | transcriptional regulator                                            | 100 | 99  | 100 | 98 |
| BMA0936.1 | hypothetical protein                                                 | 100 | 100 | 100 | 89 |
| BMA0939   | oxidoreductase, FAD-binding                                          | 100 | 100 | 100 | 95 |
| BMA0941   | flavodoxin                                                           | 100 | 100 | 100 | 97 |
| BMA0942   | ribonuclease BN                                                      | 100 | 99  | 100 | 94 |
| BMA0943   | conserved hypothetical protein                                       | 100 | 100 | 100 | 95 |
| BMA0944   | CBS domain protein                                                   | 100 | 100 | 100 | 98 |
| BMA0946   | chorismate synthase                                                  | 100 | 99  | 100 | 98 |
| BMA0953   | AcrB/AcrD/AcrF family protein                                        | 100 | 99  | 100 | 96 |
| BMA0954   | efflux transporter, RND family, MFP subunit                          | 100 | 99  | 100 | 92 |
| BMA0955   | transcriptional regulator, TetR family                               | 100 | 100 | 100 | 96 |
| BMA0956   | voltage-gated chloride channel/CBS domain protein                    | 100 | 99  | 100 | 96 |
| BMA0957   | membrane protein, putative                                           | 100 | 100 | 100 | 95 |
| BMA0958   | transcriptional regulator, LysR family                               | 100 | 99  | 100 | 95 |
| BMA0960   | conserved hypothetical protein                                       | 100 | 99  | 100 | 87 |
| BMA0961   | 2-dehydro-3-deoxygluconokinase                                       | 100 | 99  | 100 | 93 |
| BMA0962   | major facilitator family transporter                                 | 100 | 99  | 100 | 96 |
| BMA0963   | glyoxylate reductase, authentic point mutation                       | 100 | 99  | 100 | 89 |
| BMA0965   | transcriptional regulator, Lacl family                               | 100 | 99  | 100 | 93 |
| BMA0966   | membrane protein, putative                                           | 100 | 100 | 100 | 96 |
| BMA0967   | hypothetical protein                                                 | 100 | 99  | 100 | 94 |
| BMA0968   | conserved hypothetical protein                                       | 100 | 98  | 98  | 94 |
| BMA0969   | polyhydroxybutyrate depolymerase, truncation                         | 100 | 99  | 100 | 90 |
| BMA0970   | conserved hypothetical protein                                       | 100 | 98  | 100 | 91 |
| BMA0972   | transcriptional regulator, AsnC family                               | 100 | 100 | 100 | 98 |
| BMA0973   | hypothetical protein                                                 | 100 | 98  | 100 | 93 |
| BMA0974   | hypothetical protein                                                 | 100 | 100 | 100 | 88 |
| BMA0976   | conserved hypothetical protein                                       | 100 | 99  | 100 | 98 |
| BMA0977   | conserved hypothetical protein                                       | 100 | 100 | 100 | 93 |
| BMA0978   | cyd operon protein YbgT                                              | 100 | 100 | 100 | 86 |
| BMA0979   | magnesium and cobalt transport protein CorA                          | 100 | 99  | 100 | 95 |
| BMA0980   | conserved hypothetical protein                                       | 99  | 97  | 99  | 96 |
| BMA0986   | mechanosensitive ion channel family                                  | 100 | 99  | 100 | 95 |
| BMA0987   | regulatory protein nosR, putative                                    | 100 | 99  | 100 | 94 |
| BMA0988   | cytochrome c family protein                                          | 100 | 99  | 100 | 90 |
| BMA0990   | hypothetical protein                                                 | 100 | 100 | 100 | 87 |
| BMA0991   | protein disulfide isomerase NosL, putative                           | 100 | 98  | 100 | 90 |
| BMA0992   | copper ABC transporter, permease protein NosY, putative              | 100 | 99  | 100 | 94 |
| BMA0993   | copper ABC transporter, ATP-binding protein                          | 100 | 100 | 100 | 91 |
| BMA0994   | copper ABC transporter, periplasmic copper-binding protein, putative | 100 | 99  | 100 | 93 |

|           |                                                                                  |     |     |     |     |
|-----------|----------------------------------------------------------------------------------|-----|-----|-----|-----|
| BMA0995   | nitrous-oxide reductase                                                          | 100 | 99  | 100 | 96  |
| BMA0996   | AppE family protein                                                              | 100 | 99  | 100 | 91  |
| BMA0997   | ABC transporter, ATP-binding protein                                             | 100 | 98  | 100 | 91  |
| BMA0998   | transporter, putative                                                            | 100 | 99  | 100 | 93  |
| BMA1001   | dihydroxyacetone kinase                                                          | 100 | 100 | 100 | 90  |
| BMA1003   | conserved domain protein                                                         | 100 | 99  | 100 | 87  |
| BMA1004   | sodium/hydrogen exchanger                                                        | 100 | 99  | 100 | 88  |
| BMA1005   | FAD binding domain protein                                                       | 100 | 100 | 100 | 93  |
| BMA1006   | hypothetical protein                                                             | 100 | 100 | 100 | 93  |
| BMA1016   | ISBma1, transposase                                                              | 100 | 99  | 100 | 99  |
| BMA1043   | lipoprotein, putative                                                            | 100 | 99  | 100 | 94  |
| BMA1044   | conserved hypothetical protein                                                   | 100 | 99  | 100 | 96  |
| BMA1046   | conserved hypothetical protein                                                   | 100 | 99  | 100 | 93  |
| BMA1047   | conserved domain protein                                                         | 100 | 100 | 99  | 92  |
| BMA1049   | ATPase, AFG1 type                                                                | 100 | 100 | 100 | 98  |
| BMA1050   | 2-oxoglutarate dehydrogenase, E3 component, dihydrolipoamide dehydrogenase       | 100 | 99  | 100 | 97  |
| BMA1051   | 2-oxoglutarate dehydrogenase, E2 component, dihydrolipoamide succinyltransferase | 100 | 99  | 100 | 97  |
| BMA1052   | 2-oxoglutarate dehydrogenase, E1 component                                       | 100 | 99  | 100 | 99  |
| BMA1053   | GTP-binding protein TypA                                                         | 100 | 100 | 100 | 98  |
| BMA1055   | transcriptional regulator, MarR family                                           | 100 | 100 | 100 | 95  |
| BMA1056   | RND efflux system, outer membrane lipoprotein, NodT family                       | 100 | 99  | 100 | 94  |
| BMA1057   | multidrug resistance protein, putative                                           | 100 | 99  | 100 | 94  |
| BMA1058   | drug resistance transporter, EmrB/QacA family                                    | 100 | 100 | 100 | 99  |
| BMA1059   | tRNA pseudouridine synthase B                                                    | 100 | 100 | 100 | 94  |
| BMA1060   | ribosome-binding factor A                                                        | 100 | 100 | 100 | 99  |
| BMA1061   | translation initiation factor IF-2                                               | 100 | 99  | 100 | 98  |
| BMA1062   | N utilization substance protein A                                                | 100 | 100 | 100 | 99  |
| BMA1063   | conserved hypothetical protein                                                   | 100 | 99  | 100 | 99  |
| BMA1064   | RNA pseudouridylate synthase family protein                                      | 100 | 99  | 100 | 96  |
| BMA1067   | transcriptional regulator, LysR family                                           | 100 | 100 | 100 | 97  |
| BMA1069   | conserved domain protein                                                         | 100 | 100 | 100 | 100 |
| BMA1072   | hypothetical protein                                                             | 100 | 100 | 100 | 95  |
| BMA1073   | conserved hypothetical protein                                                   | 100 | 99  | 100 | 90  |
| BMA1073.1 | hypothetical protein                                                             | 100 | 98  | 100 | 91  |
| BMA1073.2 | hypothetical protein                                                             | 100 | 100 | 100 | 100 |
| BMA1075   | conserved hypothetical protein                                                   | 100 | 100 | 100 | 96  |
| BMA1080   | lipoprotein, putative                                                            | 100 | 99  | 100 | 97  |
| BMA1085   | conserved hypothetical protein                                                   | 100 | 100 | 100 | 92  |
| BMA1088   | lipoprotein, putative                                                            | 100 | 99  | 100 | 91  |
| BMA1089   | transcriptional regulator, merR family                                           | 100 | 100 | 99  | 95  |
| BMA1090   | integration host factor, alpha subunit                                           | 100 | 99  | 100 | 97  |
| BMA1091   | phenylalanyl-tRNA synthetase, beta subunit                                       | 100 | 100 | 100 | 96  |
| BMA1092   | phenylalanyl-tRNA synthetase, alpha subunit                                      | 100 | 100 | 100 | 99  |
| BMA1093   | ribosomal protein L20                                                            | 100 | 100 | 100 | 100 |
| BMA1094   | ribosomal protein L35                                                            | 100 | 100 | 100 | 100 |
| BMA1095   | translation initiation factor IF-3                                               | 100 | 99  | 100 | 99  |
| BMA1096   | threonyl-tRNA synthetase                                                         | 100 | 100 | 100 | 98  |
| BMA1098   | GTP pyrophosphokinase                                                            | 100 | 99  | 100 | 95  |
| BMA1099   | conserved hypothetical protein                                                   | 100 | 99  | 98  | 96  |

|           |                                                                        |     |     |     |     |
|-----------|------------------------------------------------------------------------|-----|-----|-----|-----|
| BMA1100   | hydrolase, alpha/beta fold family                                      | 100 | 99  | 100 | 93  |
| BMA1103   | transcriptional regulator, LysR family                                 | 100 | 99  | 100 | 94  |
| BMA1104   | conserved hypothetical protein                                         | 100 | 99  | 100 | 87  |
| BMA1105   | polysaccharide deacetylase family protein                              | 100 | 97  | 99  | 89  |
| BMA1106   | oxidoreductase, short-chain dehydrogenase/reductase family             | 100 | 97  | 100 | 91  |
| BMA1107   | 3-oxoadipate CoA-succinyl transferase beta subunit                     | 100 | 100 | 100 | 96  |
| BMA1108   | 3-oxoadipate CoA-succinyl transferase alpha subunit                    | 100 | 100 | 100 | 97  |
| BMA1109   | transcriptional regulator, LuxR family                                 | 100 | 100 | 100 | 100 |
| BMA1111   | hypothetical protein                                                   | 100 | 99  | 100 | 90  |
| BMA1114   | thioesterase family protein                                            | 100 | 100 | 99  | 97  |
| BMA1115   | oxidoreductase, short-chain dehydrogenase/reductase family             | 100 | 100 | 100 | 98  |
| BMA1116   | electron transfer flavoprotein-ubiquinone oxidoreductase, putative     | 100 | 100 | 100 | 98  |
| BMA1125   | outer membrane porin OpcP, putative                                    | 100 | 99  | 100 | 86  |
| BMA1128   | membrane protein, putative                                             | 100 | 100 | 100 | 88  |
| BMA1129   | chemotaxis protein CheW                                                | 100 | 100 | 100 | 94  |
| BMA1130   | methyl-accepting chemotaxis protein                                    | 100 | 99  | 100 | 90  |
| BMA1134   | long-chain-fatty-acid--CoA ligase, putative                            | 100 | 100 | 100 | 94  |
| BMA1136   | conserved hypothetical protein                                         | 100 | 99  | 100 | 93  |
| BMA1138   | ABC transporter, periplasmic glycine/betaine-binding protein, putative | 100 | 99  | 100 | 93  |
| BMA1139   | ABC transporter, permease protein                                      | 100 | 99  | 100 | 91  |
| BMA1140   | ABC transporter, ATP-binding protein                                   | 100 | 100 | 100 | 97  |
| BMA1141   | ABC transporter, permease protein                                      | 100 | 100 | 100 | 95  |
| BMA1144   | arginine/ornithine antiporter                                          | 100 | 100 | 100 | 96  |
| BMA1145   | arginine deiminase                                                     | 100 | 100 | 100 | 97  |
| BMA1146   | ornithine carbamoyltransferase, catabolic                              | 100 | 99  | 100 | 98  |
| BMA1147   | carbamate kinase                                                       | 100 | 99  | 100 | 95  |
| BMA1148   | oxidoreductase, short-chain dehydrogenase/reductase family             | 100 | 99  | 100 | 92  |
| BMA1149   | conserved hypothetical protein                                         | 100 | 99  | 100 | 87  |
| BMA1150   | transcriptional regulator, LysR family                                 | 100 | 100 | 100 | 97  |
| BMA1151   | glutathione S-transferase, putative                                    | 100 | 98  | 100 | 94  |
| BMA1154   | transcriptional regulator, MarR family                                 | 100 | 100 | 99  | 93  |
| BMA1157   | precorrin-4 C11-methyltransferase                                      | 100 | 99  | 100 | 95  |
| BMA1158   | precorrin-6x reductase                                                 | 100 | 99  | 100 | 89  |
| BMA1159   | cobalamin biosynthesis protein CbiD                                    | 100 | 99  | 99  | 96  |
| BMA1160   | precorrin-6Y C5,15-methyltransferase (decarboxylating)                 | 100 | 100 | 98  | 93  |
| BMA1161   | nitrite/sulfite reductase domain protein                               | 100 | 99  | 100 | 88  |
| BMA1162   | precorrin-8X methylmutase                                              | 100 | 99  | 100 | 94  |
| BMA1163   | precorrin-2 C20-methyltransferase                                      | 100 | 98  | 100 | 93  |
| BMA1164   | cbiG protein/precorrin-3B C17-methyltransferase                        | 100 | 99  | 100 | 88  |
| BMA1165   | glycosyl hydrolase, family 18                                          | 100 | 99  | 100 | 95  |
| BMA1165.1 | hypothetical protein                                                   | 100 | 99  | 99  | 90  |
| BMA1167   | carboxylesterase, putative                                             | 100 | 100 | 100 | 96  |
| BMA1171   | cobalamin synthesis protein/P47K family protein                        | 100 | 99  | 100 | 91  |
| BMA1172   | high affinity nickel transporter                                       | 100 | 100 | 100 | 96  |
| BMA1175   | cob(I)alamin adenosyltransferase                                       | 100 | 100 | 100 | 98  |
| BMA1177   | conserved hypothetical protein                                         | 100 | 99  | 100 | 96  |
| BMA1178   | TonB-dependent siderophore receptor                                    | 100 | 99  | 100 | 94  |
| BMA1179   | L-ornithine 5-monooxygenase                                            | 100 | 98  | 100 | 89  |
| BMA1183   | cyclic peptide ABC transporter, ATP-binding protein                    | 100 | 99  | 100 | 98  |



|           |                                                                          |     |     |     |     |
|-----------|--------------------------------------------------------------------------|-----|-----|-----|-----|
| BMA1185   | iron compound ABC transporter, periplasmic iron-compound-binding protein | 100 | 99  | 99  | 92  |
| BMA1186   | ferric iron reductase protein FhuF                                       | 100 | 99  | 98  | 90  |
| BMA1187   | iron compound ABC transporter, permease protein                          | 100 | 99  | 100 | 92  |
| BMA1188   | iron compound ABC transporter, ATP-binding protein                       | 100 | 99  | 100 | 88  |
| BMA1189   | syringomycin biosynthesis enzyme, putative                               | 100 | 100 | 100 | 95  |
| BMA1190   | mbtH-like protein                                                        | 100 | 100 | 100 | 91  |
| BMA1191   | RNA polymerase sigma-70 factor, ECF subfamily                            | 100 | 99  | 100 | 97  |
| BMA1193   | oxidoreductase, short chain dehydrogenase/reductase family               | 100 | 100 | 100 | 93  |
| BMA1195   | oxidoreductase, zinc-binding dehydrogenase family                        | 100 | 99  | 100 | 94  |
| BMA1196   | ribose ABC transporter, permease protein                                 | 100 | 97  | 100 | 89  |
| BMA1197   | ribose ABC transporter, ATP-binding protein                              | 100 | 99  | 100 | 92  |
| BMA1198   | ribose ABC transporter, periplasmic ribose-binding protein               | 100 | 99  | 100 | 92  |
| BMA1199   | transcriptional regulator, AraC family                                   | 100 | 98  | 100 | 94  |
| BMA1205   | cys regulon transcriptional activator                                    | 100 | 100 | 100 | 99  |
| BMA1206   | sulfate ABC transporter, ATP-binding protein                             | 100 | 99  | 100 | 97  |
| BMA1207   | sulfate ABC transporter, permease protein                                | 100 | 98  | 100 | 97  |
| BMA1208   | sulfate ABC transporter, permease protein                                | 100 | 99  | 99  | 96  |
| BMA1209   | sulfate ABC transporter, periplasmic sulfate-binding protein             | 100 | 99  | 100 | 95  |
| BMA1211   | lexA repressor                                                           | 100 | 100 | 100 | 99  |
| BMA1215   | universal stress protein family                                          | 100 | 100 | 100 | 96  |
| BMA1218   | nodulation ABC transporter NodI                                          | 100 | 99  | 100 | 94  |
| BMA1219   | ABC transporter, permease NodJ                                           | 100 | 100 | 100 | 96  |
| BMA1220   | hypothetical protein                                                     | 100 | 98  | 99  | 96  |
| BMA1221   | transporter, putative                                                    | 100 | 99  | 100 | 96  |
| BMA1222   | oxidoreductase, aldo/keto reductase family                               | 100 | 99  | 100 | 96  |
| BMA1223   | conserved hypothetical protein                                           | 100 | 99  | 100 | 95  |
| BMA1224   | transcriptional regulator, putative                                      | 100 | 100 | 98  | 94  |
| BMA1226   | sodium:dicarboxylate symporter family protein                            | 100 | 99  | 100 | 97  |
| BMA1227   | dihydrouridine synthase                                                  | 100 | 99  | 100 | 95  |
| BMA1230   | ISBma1, transposase, interruption-N                                      | 100 | 99  | 100 | 98  |
| BMA1233.1 | hypothetical protein                                                     | 100 | 98  | 100 | 95  |
| BMA1236   | molybdenum-pterin binding protein, putative                              | 100 | 100 | 100 | 97  |
| BMA1237   | aliphatic sulfonate ABC transporter, ATP-binding protein                 | 100 | 99  | 98  | 91  |
| BMA1238   | aliphatic sulfonate ABC transporter, permease protein                    | 100 | 100 | 100 | 91  |
| BMA1239   | alkanesulfonate monooxygenase                                            | 100 | 100 | 100 | 94  |
| BMA1241   | hypothetical protein                                                     | 100 | 100 | 100 | 97  |
| BMA1242   | hypothetical protein                                                     | 100 | 100 | 100 | 97  |
| BMA1244   | enoyl-CoA hydratase/isomerase family protein                             | 100 | 99  | 100 | 94  |
| BMA1245   | multidrug resistance protein, SMR family                                 | 100 | 100 | 100 | 91  |
| BMA1246   | conserved hypothetical protein                                           | 100 | 100 | 98  | 95  |
| BMA1250   | pyrophosphatase, MutT/nudix family                                       | 100 | 100 | 100 | 100 |
| BMA1251   | leucyl/phenylalanyl-tRNA--protein transferase                            | 100 | 98  | 100 | 94  |
| BMA1252   | arginine-tRNA-protein transferase, putative                              | 100 | 99  | 100 | 96  |
| BMA1253   | dihydroorotate dehydrogenase                                             | 100 | 99  | 100 | 95  |
| BMA1254   | amino acid ABC transporter, periplasmic amino acid-binding protein       | 100 | 100 | 100 | 97  |
| BMA1255   | amino acid ABC transporter, permease protein                             | 100 | 100 | 100 | 97  |
| BMA1258   | oxidoreductase, Gfo/ldh/MocA family                                      | 100 | 99  | 100 | 93  |
| BMA1259   | transcriptional regulator, GntR family                                   | 100 | 100 | 100 | 99  |
| BMA1260   | ribose 5-phosphate isomerase                                             | 100 | 99  | 100 | 96  |

|           |                                                                    |     |     |     |    |
|-----------|--------------------------------------------------------------------|-----|-----|-----|----|
| BMA1261   | N-acetylmuramoyl-L-alanine amidase domain protein                  | 100 | 99  | 100 | 95 |
| BMA1262   | RNA methyltransferase, TrmH family, group 3                        | 100 | 100 | 100 | 97 |
| BMA1263   | ribonuclease R                                                     | 100 | 99  | 100 | 97 |
| BMA1269   | hypothetical protein                                               | 100 | 99  | 100 | 87 |
| BMA1270   | sulfate permease family protein                                    | 100 | 99  | 100 | 94 |
| BMA1271   | conserved hypothetical protein                                     | 100 | 100 | 100 | 94 |
| BMA1272   | acetyltransferase, GNAT family                                     | 100 | 100 | 100 | 92 |
| BMA1274   | major facilitator family transporter                               | 100 | 100 | 100 | 95 |
| BMA1275   | transcriptional regulator, TetR family                             | 100 | 99  | 100 | 90 |
| BMA1276   | long-chain-fatty-acid--CoA ligase                                  | 100 | 100 | 100 | 95 |
| BMA1277   | conserved hypothetical protein                                     | 100 | 97  | 100 | 90 |
| BMA1281   | conserved hypothetical protein                                     | 100 | 99  | 100 | 91 |
| BMA1282   | sigma-54 dependent transcriptional regulator                       | 100 | 99  | 100 | 98 |
| BMA1283   | conserved hypothetical protein                                     | 100 | 99  | 100 | 92 |
| BMA1285   | TPR domain protein                                                 | 100 | 99  | 100 | 89 |
| BMA1289   | conserved hypothetical protein                                     | 100 | 100 | 100 | 97 |
| BMA1290   | type II/III secretion system protein                               | 100 | 99  | 100 | 95 |
| BMA1291   | conserved hypothetical protein                                     | 100 | 99  | 100 | 89 |
| BMA1292   | conserved hypothetical protein                                     | 100 | 100 | 100 | 94 |
| BMA1293   | peptidase, putative                                                | 100 | 99  | 100 | 92 |
| BMA1293.1 | hypothetical protein                                               | 100 | 97  | 100 | 95 |
| BMA1298   | putrescine ABC transporter, permease protein                       | 100 | 100 | 100 | 96 |
| BMA1299   | putrescine ABC transporter, permease protein                       | 100 | 99  | 99  | 97 |
| BMA1300   | putrescine ABC transporter, ATP-binding protein                    | 100 | 99  | 100 | 97 |
| BMA1301   | putrescine ABC transporter, periplasmic putrescine-binding protein | 100 | 99  | 100 | 97 |
| BMA1302   | Mn2+/Fe2+ transporter, NRAMP family, authentic point mutation      | 100 | 99  | 100 | 93 |
| BMA1303   | conserved hypothetical protein                                     | 100 | 100 | 100 | 97 |
| BMA1304   | outer membrane protein, OmpW family                                | 100 | 100 | 100 | 99 |
| BMA1305   | oxidoreductase, 2-nitropropane dioxygenase family                  | 100 | 100 | 100 | 94 |
| BMA1306   | aldehyde dehydrogenase                                             | 100 | 99  | 100 | 94 |
| BMA1308   | ABC transporter, ATP-binding protein                               | 100 | 99  | 100 | 99 |
| BMA1309   | AsmA family protein                                                | 100 | 99  | 100 | 89 |
| BMA1310   | ABC transporter, ATP-binding protein                               | 100 | 99  | 100 | 91 |
| BMA1311   | membrane protein, putative                                         | 100 | 99  | 100 | 96 |
| BMA1312   | hypothetical protein                                               | 100 | 100 | 100 | 91 |
| BMA1314   | cystathionine beta-lyase                                           | 100 | 99  | 100 | 96 |
| BMA1316   | beta-ketothiolase                                                  | 100 | 99  | 100 | 97 |
| BMA1317   | carbohydrate kinase, PfkB family                                   | 100 | 98  | 99  | 95 |
| BMA1318   | MiaB-like tRNA modifying enzyme YliG, TIGR01125                    | 100 | 99  | 100 | 96 |
| BMA1319   | polyhydroxyalkanoate synthesis repressor PhaR                      | 100 | 100 | 100 | 98 |
| BMA1320   | acetoacetyl-CoA reductase                                          | 100 | 100 | 100 | 98 |
| BMA1321   | acetyl-CoA acetyltransferase                                       | 100 | 99  | 100 | 98 |
| BMA1322   | poly(R)-hydroxyalkanoic acid synthase, class I                     | 100 | 99  | 100 | 93 |
| BMA1323   | conserved hypothetical protein TIGR00726                           | 100 | 100 | 100 | 89 |
| BMA1324   | ribosomal large subunit pseudouridine synthase D                   | 100 | 99  | 100 | 94 |
| BMA1325   | competence lipoprotein ComL                                        | 100 | 98  | 100 | 98 |
| BMA1326   | ATP-dependent helicase, putative                                   | 100 | 99  | 100 | 93 |
| BMA1327   | conserved hypothetical protein                                     | 100 | 98  | 100 | 95 |
| BMA1328   | lipoprotein, putative                                              | 100 | 99  | 100 | 88 |

|           |                                                                       |     |     |     |     |
|-----------|-----------------------------------------------------------------------|-----|-----|-----|-----|
| BMA1329   | transcription accessory protein, TEX                                  | 100 | 99  | 100 | 97  |
| BMA1331   | potassium uptake protein                                              | 100 | 99  | 100 | 98  |
| BMA1332   | phosphoribosyl transferase domain protein                             | 100 | 99  | 100 | 98  |
| BMA1333   | adenylosuccinate synthetase                                           | 100 | 99  | 100 | 98  |
| BMA1335   | ATP phosphoribosyltransferase regulatory subunit                      | 100 | 100 | 100 | 98  |
| BMA1337   | ftsH protease activity modulator HflC                                 | 100 | 100 | 100 | 91  |
| BMA1338   | ftsH protease activity modulator HflK                                 | 100 | 99  | 100 | 93  |
| BMA1339   | GTP-binding protein HflX                                              | 100 | 99  | 100 | 97  |
| BMA1340   | hfq protein                                                           | 100 | 100 | 100 | 100 |
| BMA1341   | GTPase family protein                                                 | 100 | 100 | 100 | 98  |
| BMA1342   | lipoprotein, putative                                                 | 100 | 99  | 100 | 97  |
| BMA1343   | conserved hypothetical protein                                        | 100 | 100 | 100 | 92  |
| BMA1344   | histidyl-tRNA synthetase                                              | 100 | 99  | 100 | 96  |
| BMA1345   | 1-hydroxy-2-methyl-2-(E)-butenyl 4-diphosphate synthase               | 100 | 100 | 100 | 97  |
| BMA1346   | conserved hypothetical protein                                        | 100 | 99  | 100 | 87  |
| BMA1347   | radical SAM enzyme, Cfr family                                        | 100 | 100 | 100 | 98  |
| BMA1348   | nucleoside diphosphate kinase                                         | 100 | 100 | 100 | 97  |
| BMA1349   | membrane protein, putative                                            | 100 | 99  | 100 | 99  |
| BMA1350   | ribosomal RNA large subunit (uracil-5-)-methyltransferase             | 100 | 99  | 100 | 95  |
| BMA1350.1 | endonuclease/exonuclease/phosphatase family superfamily               | 100 | 100 | 99  | 90  |
| BMA1353   | conserved hypothetical protein                                        | 100 | 100 | 100 | 97  |
| BMA1354   | RNA polymerase sigma factor                                           | 100 | 100 | 100 | 96  |
| BMA1355   | lipoprotein NlpD, putative                                            | 100 | 100 | 100 | 93  |
| BMA1356   | protein-L-isoaspartate O-methyltransferase                            | 100 | 99  | 100 | 90  |
| BMA1357   | acid phosphatase SurE                                                 | 100 | 99  | 100 | 95  |
| BMA1358   | CAIB/BAIF family protein                                              | 100 | 99  | 100 | 96  |
| BMA1359   | recombination protein RecR                                            | 100 | 99  | 100 | 98  |
| BMA1360   | conserved hypothetical protein TIGR00103                              | 100 | 100 | 100 | 97  |
| BMA1364   | thioredoxin                                                           | 100 | 100 | 100 | 99  |
| BMA1365   | transcription termination factor Rho                                  | 100 | 99  | 100 | 99  |
| BMA1366   | transcriptional regulator, MerR family                                | 100 | 99  | 100 | 95  |
| BMA1367   | multidrug resistance protein, putative                                | 100 | 98  | 100 | 94  |
| BMA1368   | conserved hypothetical protein                                        | 100 | 98  | 100 | 95  |
| BMA1369   | ribosomal protein L31                                                 | 100 | 100 | 100 | 97  |
| BMA1370   | membrane protein, putative                                            | 100 | 99  | 100 | 95  |
| BMA1371   | multidrug resistance protein NorM, putative                           | 100 | 99  | 100 | 93  |
| BMA1373   | carboxymuconolactone decarboxylase family protein                     | 100 | 99  | 100 | 92  |
| BMA1374   | transcriptional regulator, MerR family                                | 100 | 100 | 99  | 88  |
| BMA1376   | conserved hypothetical protein                                        | 100 | 99  | 100 | 94  |
| BMA1377   | ATP-dependent Clp protease, ATP-binding subunit ClpB                  | 100 | 99  | 100 | 98  |
| BMA1378   | Rrf2 family protein                                                   | 100 | 100 | 100 | 92  |
| BMA1379   | conserved hypothetical protein                                        | 100 | 100 | 100 | 95  |
| BMA1380   | molybdopterin converting factor, subunit 2                            | 100 | 99  | 100 | 92  |
| BMA1381   | molybdopterin converting factor, subunit 1                            | 100 | 100 | 100 | 98  |
| BMA1382   | molybdopterin biosynthesis moeA protein                               | 100 | 98  | 100 | 92  |
| BMA1384   | threonine synthase                                                    | 100 | 100 | 100 | 95  |
| BMA1385   | homoserine dehydrogenase                                              | 100 | 100 | 100 | 97  |
| BMA1387   | conserved hypothetical protein                                        | 100 | 100 | 100 | 96  |
| BMA1388   | dolichyl-phosphate-mannose-protein mannosyltransferase family protein | 100 | 99  | 100 | 95  |

|         |                                                           |     |     |     |     |
|---------|-----------------------------------------------------------|-----|-----|-----|-----|
| BMA1389 | membrane protein, putative                                | 100 | 100 | 100 | 100 |
| BMA1390 | aminotransferase, DegT/DnrJ/EryC1/StrS family             | 100 | 99  | 100 | 96  |
| BMA1391 | glycosyl transferase, group 2 family protein              | 100 | 100 | 100 | 99  |
| BMA1392 | formyltransferase, putative                               | 100 | 100 | 100 | 93  |
| BMA1393 | conserved hypothetical protein                            | 100 | 99  | 100 | 98  |
| BMA1394 | polysaccharide deacetylase family protein                 | 100 | 99  | 100 | 96  |
| BMA1395 | antioxidant, AhpC/Tsa family                              | 100 | 98  | 100 | 93  |
| BMA1396 | PhoH family protein                                       | 100 | 99  | 100 | 95  |
| BMA1398 | phosphate transporter family protein                      | 100 | 100 | 100 | 100 |
| BMA1399 | conserved hypothetical protein                            | 100 | 100 | 100 | 99  |
| BMA1400 | replicative DNA helicase                                  | 100 | 100 | 100 | 99  |
| BMA1401 | ribosomal protein L9                                      | 100 | 100 | 100 | 97  |
| BMA1402 | ribosomal protein S18                                     | 100 | 100 | 100 | 100 |
| BMA1403 | primosomal replication protein n                          | 100 | 98  | 100 | 96  |
| BMA1404 | ribosomal protein S6                                      | 100 | 100 | 100 | 100 |
| BMA1407 | Ser/Thr protein phosphatase family protein                | 100 | 100 | 98  | 95  |
| BMA1408 | cytochrome c oxidase family protein                       | 100 | 99  | 100 | 90  |
| BMA1413 | asparaginase family protein                               | 100 | 100 | 100 | 94  |
| BMA1414 | phosphate starvation-inducible protein                    | 100 | 100 | 100 | 97  |
| BMA1416 | lipoprotein, putative                                     | 100 | 100 | 100 | 98  |
| BMA1417 | glycosyl transferase, group 1 family protein              | 100 | 100 | 100 | 98  |
| BMA1418 | conserved hypothetical protein                            | 100 | 99  | 97  | 90  |
| BMA1419 | mechanosensitive ion channel family protein               | 100 | 99  | 100 | 93  |
| BMA1420 | hypothetical protein                                      | 100 | 99  | 100 | 99  |
| BMA1421 | ankyrin repeat protein                                    | 100 | 96  | 100 | 93  |
| BMA1422 | hydrolase, TatD family                                    | 100 | 100 | 100 | 93  |
| BMA1423 | phosphinothricin acetyltransferase                        | 100 | 98  | 100 | 98  |
| BMA1424 | DNA polymerase III, delta prime subunit                   | 100 | 100 | 100 | 97  |
| BMA1425 | thymidylate kinase                                        | 100 | 99  | 100 | 96  |
| BMA1426 | lipoprotein, putative                                     | 100 | 100 | 100 | 94  |
| BMA1427 | conserved hypothetical protein                            | 100 | 100 | 100 | 94  |
| BMA1428 | conserved hypothetical protein                            | 100 | 100 | 100 | 95  |
| BMA1429 | acetyltransferase, GNAT family                            | 100 | 100 | 100 | 95  |
| BMA1430 | esterase                                                  | 100 | 100 | 100 | 95  |
| BMA1431 | oxidoreductase, zinc-binding dehydrogenase family protein | 100 | 99  | 100 | 93  |
| BMA1432 | conserved hypothetical protein                            | 100 | 100 | 100 | 95  |
| BMA1433 | conserved hypothetical protein                            | 100 | 100 | 100 | 98  |
| BMA1435 | hypothetical protein                                      | 100 | 99  | 100 | 93  |
| BMA1436 | thiolase family protein                                   | 100 | 99  | 100 | 97  |
| BMA1437 | pyrazinamidase/nicotinamidase                             | 100 | 99  | 100 | 92  |
| BMA1438 | fatty oxidation complex, alpha subunit, putative          | 100 | 99  | 100 | 95  |
| BMA1439 | medium-chain-fatty-acid--CoA ligase                       | 100 | 99  | 100 | 96  |
| BMA1440 | conserved hypothetical protein                            | 100 | 99  | 100 | 95  |
| BMA1441 | methionine-R-sulfoxide reductase                          | 100 | 100 | 100 | 96  |
| BMA1442 | intracellular septation protein A                         | 100 | 100 | 100 | 98  |
| BMA1443 | BoIA-like protein                                         | 100 | 98  | 100 | 91  |
| BMA1444 | peptidyl-prolyl cis-trans isomerase domain protein        | 100 | 99  | 100 | 98  |
| BMA1446 | phosphoribosylformylglycinamide synthase                  | 100 | 99  | 100 | 96  |
| BMA1447 | D-amino acid dehydrogenase, small subunit, putative       | 100 | 99  | 100 | 95  |

|           |                                                                    |     |     |     |     |
|-----------|--------------------------------------------------------------------|-----|-----|-----|-----|
| BMA1448   | carbohydrate kinase, putative                                      | 100 | 99  | 100 | 93  |
| BMA1449   | glucose-6-phosphate isomerase                                      | 100 | 99  | 100 | 97  |
| BMA1450   | ABC transporter, ATP-binding protein                               | 100 | 99  | 100 | 95  |
| BMA1451   | acyl-CoA thioesterase I                                            | 100 | 99  | 100 | 93  |
| BMA1453   | peptidyl-prolyl cis-trans isomerase D, putative                    | 100 | 99  | 100 | 95  |
| BMA1458   | hypothetical protein                                               | 100 | 100 | 100 | 88  |
| BMA1460   | ribosomal subunit interface protein YfiA, putative                 | 100 | 100 | 99  | 87  |
| BMA1463   | ATP-dependent protease La                                          | 100 | 100 | 100 | 99  |
| BMA1464   | ATP-dependent Clp protease, ATP-binding subunit ClpX               | 100 | 99  | 100 | 99  |
| BMA1465   | ATP-dependent Clp protease, proteolytic subunit ClpP               | 100 | 99  | 100 | 99  |
| BMA1466   | trigger factor                                                     | 100 | 99  | 100 | 96  |
| BMA1468   | glycerate kinase 1                                                 | 100 | 99  | 100 | 89  |
| BMA1469   | transcriptional regulator, MarR family                             | 100 | 100 | 100 | 93  |
| BMA1471   | 2-dehydropantoate 2-reductase                                      | 100 | 98  | 100 | 91  |
| BMA1472   | transcriptional regulator, LuxR family                             | 100 | 98  | 100 | 91  |
| BMA1473   | outer membrane porin, putative                                     | 100 | 99  | 100 | 86  |
| BMA1474   | membrane protein, putative                                         | 100 | 99  | 100 | 87  |
| BMA1475   | histone deacetylase family protein                                 | 100 | 99  | 100 | 93  |
| BMA1476   | endonuclease Nuc                                                   | 100 | 100 | 100 | 89  |
| BMA1482   | phytoene synthase, putative                                        | 100 | 98  | 99  | 87  |
| BMA1483   | twin-arginine translocation pathway signal sequence domain protein | 100 | 98  | 100 | 91  |
| BMA1484   | conserved hypothetical protein                                     | 100 | 99  | 100 | 91  |
| BMA1484.1 | hypothetical protein                                               | 100 | 100 | 100 | 94  |
| BMA1485   | DNA-binding response regulator RisA                                | 100 | 100 | 100 | 100 |
| BMA1486   | sensor histidine kinase RisS                                       | 100 | 99  | 100 | 97  |
| BMA1487   | antioxidant, AhpC/Tsa family                                       | 100 | 100 | 100 | 100 |
| BMA1488   | alkyl hydroperoxide reductase D                                    | 100 | 100 | 100 | 94  |
| BMA1489   | 2C-methyl-D-erythritol 2,4-cyclodiphosphate synthase               | 100 | 100 | 100 | 98  |
| BMA1490   | 4-diphosphocytidyl-2C-methyl-D-erythritol synthase                 | 100 | 99  | 100 | 97  |
| BMA1491   | transcription-repair coupling factor                               | 100 | 99  | 100 | 98  |
| BMA1493   | acetylornithine deacetylase                                        | 100 | 100 | 100 | 96  |
| BMA1494   | threonine dehydratase catabolic                                    | 100 | 99  | 100 | 95  |
| BMA1497   | penicillin-binding protein, 1A family                              | 100 | 99  | 100 | 96  |
| BMA1498   | PspA/IM30 family protein                                           | 100 | 99  | 100 | 99  |
| BMA1499   | hypothetical protein                                               | 100 | 99  | 100 | 90  |
| BMA1501   | large conductance mechanosensitive channel protein                 | 100 | 100 | 100 | 100 |
| BMA1502   | hypothetical protein                                               | 100 | 100 | 100 | 99  |
| BMA1504   | ureidoglycolate hydrolase                                          | 100 | 100 | 100 | 89  |
| BMA1505   | allantoicase                                                       | 100 | 100 | 100 | 94  |
| BMA1507   | conserved hypothetical protein                                     | 100 | 99  | 100 | 90  |
| BMA1508   | polysaccharide deacetylase family protein                          | 100 | 99  | 100 | 97  |
| BMA1509   | hydantoin racemase                                                 | 100 | 96  | 95  | 94  |
| BMA1510   | NCS1 nucleoside transporter family protein                         | 100 | 99  | 100 | 95  |
| BMA1511   | transcriptional regulator, GntR family                             | 100 | 100 | 100 | 96  |
| BMA1512   | ISBma1, transposase                                                | 100 | 99  | 100 | 99  |
| BMA1513   | muramoyltetrapeptide carboxypeptidase                              | 100 | 100 | 100 | 95  |
| BMA1514   | cytidine/deoxycytidylate deaminase family protein                  | 100 | 100 | 100 | 96  |
| BMA1515   | conserved hypothetical protein                                     | 100 | 100 | 100 | 98  |
| BMA1522   | GMP synthase                                                       | 100 | 99  | 100 | 98  |

|         |                                                                        |     |     |     |    |
|---------|------------------------------------------------------------------------|-----|-----|-----|----|
| BMA1524 | inosine-5'-monophosphate dehydrogenase                                 | 100 | 100 | 100 | 98 |
| BMA1526 | conserved hypothetical protein                                         | 100 | 98  | 100 | 90 |
| BMA1528 | conserved hypothetical protein                                         | 100 | 99  | 100 | 90 |
| BMA1529 | membrane protein, putative                                             | 100 | 100 | 100 | 97 |
| BMA1530 | TGS domain protein                                                     | 100 | 100 | 100 | 91 |
| BMA1531 | conserved hypothetical protein                                         | 100 | 100 | 100 | 98 |
| BMA1532 | SsrA-binding protein                                                   | 100 | 100 | 100 | 99 |
| BMA1533 | SPFH domain/band 7 family protein                                      | 100 | 100 | 100 | 98 |
| BMA1534 | conserved hypothetical protein                                         | 100 | 100 | 100 | 94 |
| BMA1535 | phosphoenolpyruvate synthase                                           | 100 | 100 | 100 | 99 |
| BMA1537 | phytochelatin synthase, putative                                       | 100 | 99  | 99  | 89 |
| BMA1538 | serine protease, subtilase family                                      | 100 | 99  | 100 | 91 |
| BMA1539 | conserved hypothetical protein                                         | 100 | 100 | 100 | 98 |
| BMA1540 | RNA methyltransferase, TrmH family                                     | 100 | 100 | 99  | 93 |
| BMA1541 | ribonuclease HII                                                       | 100 | 99  | 100 | 96 |
| BMA1542 | lipid-A-disaccharide synthase                                          | 100 | 98  | 100 | 95 |
| BMA1543 | acyl-(acyl-carrier-protein)--UDP-N-acetylglucosamine O-acyltransferase | 100 | 100 | 100 | 98 |
| BMA1544 | beta-hydroxyacyl-(acyl-carrier-protein) dehydratase FabZ               | 100 | 100 | 100 | 98 |
| BMA1545 | UDP-3-O-3-hydroxymyristoyl glucosamine N-acyltransferase               | 100 | 99  | 100 | 95 |
| BMA1546 | outer membrane protein, OmpH/HlpA family                               | 100 | 99  | 100 | 98 |
| BMA1547 | outer membrane protein, OMP85 family                                   | 100 | 99  | 100 | 99 |
| BMA1548 | membrane-associated zinc metalloprotease, putative                     | 100 | 99  | 100 | 95 |
| BMA1549 | 1-deoxy-D-xylulose 5-phosphate reductoisomerase                        | 100 | 99  | 100 | 96 |
| BMA1550 | phosphatidate cytidyltransferase                                       | 100 | 99  | 100 | 95 |
| BMA1551 | undecaprenyl diphosphate synthase                                      | 100 | 99  | 100 | 98 |
| BMA1552 | ribosome recycling factor                                              | 100 | 100 | 100 | 95 |
| BMA1553 | uridylate kinase                                                       | 100 | 100 | 100 | 99 |
| BMA1554 | translation elongation factor Ts                                       | 100 | 100 | 100 | 97 |
| BMA1555 | ribosomal protein S2                                                   | 100 | 100 | 100 | 97 |
| BMA1556 | methionine aminopeptidase, type I                                      | 100 | 100 | 100 | 97 |
| BMA1557 | protein-P-II uridylyltransferase                                       | 100 | 99  | 100 | 97 |
| BMA1558 | pseudouridine synthase family protein                                  | 100 | 99  | 100 | 97 |
| BMA1559 | polypeptide deformylase                                                | 100 | 100 | 100 | 97 |
| BMA1560 | DNA ligase, NAD-dependent                                              | 100 | 99  | 100 | 95 |
| BMA1562 | conserved hypothetical protein                                         | 100 | 98  | 100 | 92 |
| BMA1563 | chromosome segregation protein SMC                                     | 100 | 99  | 100 | 97 |
| BMA1564 | membrane protein, putative                                             | 100 | 98  | 100 | 94 |
| BMA1565 | aromatic aminotransferase, putative                                    | 100 | 99  | 100 | 93 |
| BMA1566 | 2,3,4,5-tetrahydropyridine-2,6-dicarboxylate N-succinyltransferase     | 100 | 100 | 100 | 99 |
| BMA1567 | conserved hypothetical protein                                         | 100 | 98  | 100 | 96 |
| BMA1568 | succinyl-diaminopimelate desuccinylase                                 | 100 | 99  | 100 | 97 |
| BMA1569 | hemK family protein                                                    | 100 | 100 | 100 | 96 |
| BMA1570 | cardiolipin synthetase, putative                                       | 100 | 100 | 100 | 96 |
| BMA1571 | glutathione peroxidase                                                 | 100 | 100 | 100 | 98 |
| BMA1572 | ABC transporter, ATP-binding protein                                   | 100 | 99  | 100 | 96 |
| BMA1574 | DNA repair protein RadA                                                | 100 | 100 | 100 | 99 |
| BMA1575 | alanine racemase                                                       | 100 | 100 | 100 | 96 |
| BMA1576 | transporter, putative                                                  | 100 | 100 | 100 | 97 |
| BMA1577 | phosphomethylpyrimidine kinase                                         | 100 | 99  | 100 | 93 |

|         |                                                              |     |     |     |    |
|---------|--------------------------------------------------------------|-----|-----|-----|----|
| BMA1579 | conserved hypothetical protein                               | 100 | 99  | 100 | 86 |
| BMA1580 | phage SPO1 DNA polymerase domain protein                     | 100 | 98  | 100 | 95 |
| BMA1581 | ribosomal-protein-alanine acetyltransferase                  | 100 | 100 | 99  | 96 |
| BMA1582 | glycoprotease family protein                                 | 100 | 100 | 100 | 90 |
| BMA1583 | acyl-CoA-binding protein                                     | 100 | 100 | 100 | 97 |
| BMA1584 | ATP-dependent RNA helicase RhIE, putative                    | 100 | 100 | 100 | 95 |
| BMA1586 | isocitrate lyase                                             | 100 | 100 | 100 | 99 |
| BMA1587 | universal stress protein family                              | 100 | 100 | 100 | 97 |
| BMA1588 | transcriptional regulator, LysR family                       | 100 | 100 | 100 | 98 |
| BMA1589 | haloacid dehalogenase, type II                               | 100 | 100 | 100 | 94 |
| BMA1590 | malate synthase A                                            | 100 | 99  | 100 | 96 |
| BMA1593 | protein of unknown function                                  | 100 | 100 | 99  | 92 |
| BMA1594 | transcriptional regulator, AraC family                       | 100 | 100 | 100 | 94 |
| BMA1596 | acetyltransferase, GNAT family                               | 100 | 99  | 100 | 96 |
| BMA1600 | glutamyl-tRNA synthetase                                     | 100 | 99  | 100 | 94 |
| BMA1601 | patatin-like phospholipase                                   | 100 | 99  | 100 | 94 |
| BMA1602 | NLP/P60 family protein                                       | 100 | 99  | 100 | 95 |
| BMA1603 | hypothetical protein                                         | 100 | 96  | 100 | 90 |
| BMA1604 | ABC transporter, ATP-binding protein                         | 100 | 100 | 100 | 93 |
| BMA1605 | ABC transporter, permease protein                            | 100 | 99  | 100 | 96 |
| BMA1606 | ABC transporter, permease protein                            | 100 | 100 | 100 | 98 |
| BMA1607 | ABC transporter, periplasmic substrate-binding protein       | 100 | 99  | 100 | 91 |
| BMA1608 | enoyl-(acyl-carrier-protein) reductase                       | 100 | 100 | 100 | 98 |
| BMA1609 | conserved hypothetical protein                               | 100 | 100 | 100 | 96 |
| BMA1612 | molybdopterin oxidoreductase family protein                  | 100 | 99  | 100 | 92 |
| BMA1617 | transcriptional regulator, TetR family                       | 100 | 99  | 100 | 91 |
| BMA1618 | methionine aminopeptidase, type I                            | 100 | 100 | 100 | 91 |
| BMA1619 | conserved hypothetical protein                               | 100 | 100 | 100 | 94 |
| BMA1620 | argininosuccinate lyase domain protein                       | 100 | 99  | 100 | 89 |
| BMA1621 | cysteine synthase/cystathionine beta-synthase family protein | 100 | 100 | 100 | 95 |
| BMA1622 | kinase, putative                                             | 100 | 100 | 100 | 89 |
| BMA1623 | sulfate adenyltransferase, subunit 2                         | 100 | 100 | 100 | 96 |
| BMA1624 | glycosyl transferase, group 2 family protein                 | 100 | 98  | 100 | 91 |
| BMA1625 | phosphoserine aminotransferase                               | 100 | 99  | 100 | 92 |
| BMA1626 | acyltransferase family protein                               | 100 | 99  | 100 | 94 |
| BMA1627 | conserved hypothetical protein                               | 100 | 96  | 100 | 87 |
| BMA1628 | transketolase, C-terminal subunit                            | 100 | 99  | 100 | 90 |
| BMA1629 | transketolase, N-terminal subunit                            | 100 | 100 | 100 | 93 |
| BMA1630 | hypothetical protein                                         | 100 | 99  | 97  | 88 |
| BMA1631 | hypothetical protein                                         | 100 | 99  | 100 | 95 |
| BMA1632 | hypothetical protein                                         | 100 | 98  | 100 | 96 |
| BMA1633 | dioxygenase, TauD/TfdA                                       | 100 | 99  | 100 | 95 |
| BMA1634 | conserved hypothetical protein                               | 100 | 99  | 100 | 89 |
| BMA1636 | conserved hypothetical protein                               | 100 | 99  | 100 | 93 |
| BMA1637 | membrane protein, putative                                   | 100 | 99  | 100 | 92 |
| BMA1638 | peptide synthetase-domain protein                            | 100 | 99  | 100 | 91 |
| BMA1643 | multidrug efflux RND membrane fusion protein MexE            | 100 | 98  | 100 | 87 |
| BMA1644 | AcrB/AcrD/AcrF family protein                                | 100 | 99  | 100 | 96 |
| BMA1645 | hypothetical protein                                         | 100 | 99  | 100 | 88 |

|         |                                                              |     |     |     |     |
|---------|--------------------------------------------------------------|-----|-----|-----|-----|
| BMA1646 | hypothetical protein                                         | 100 | 100 | 100 | 98  |
| BMA1647 | outer membrane autotransporter domain protein                | 100 | 99  | 99  | 88  |
| BMA1648 | conserved hypothetical protein                               | 100 | 98  | 99  | 87  |
| BMA1652 | aspartokinase, alpha and beta subunits                       | 100 | 100 | 100 | 99  |
| BMA1653 | cell cycle protein mesJ                                      | 100 | 99  | 100 | 88  |
| BMA1654 | acetyl-CoA carboxylase, carboxyl transferase, alpha subunit  | 100 | 100 | 100 | 97  |
| BMA1655 | DNA-3-methyladenine glycosylase                              | 100 | 99  | 100 | 99  |
| BMA1656 | cysteinyl-tRNA synthetase                                    | 100 | 100 | 100 | 96  |
| BMA1657 | TPR domain protein                                           | 100 | 100 | 100 | 94  |
| BMA1658 | peptidyl-prolyl cis-trans isomerase A                        | 100 | 100 | 100 | 99  |
| BMA1659 | peptidyl-prolyl cis-trans isomerase B                        | 100 | 100 | 100 | 99  |
| BMA1660 | UDP-2,3-diacetylglucosamine hydrolase                        | 100 | 99  | 100 | 94  |
| BMA1662 | serine O-acetyltransferase                                   | 100 | 100 | 100 | 94  |
| BMA1663 | RNA methyltransferase, TrmH family, group 1                  | 100 | 99  | 99  | 92  |
| BMA1664 | inositol-1-monophosphatase                                   | 100 | 100 | 100 | 97  |
| BMA1671 | DNA mismatch repair protein MutS                             | 100 | 99  | 100 | 95  |
| BMA1672 | conserved hypothetical protein                               | 100 | 99  | 100 | 87  |
| BMA1674 | conserved hypothetical protein                               | 100 | 99  | 100 | 94  |
| BMA1676 | metallo-beta-lactamase family protein                        | 100 | 99  | 100 | 96  |
| BMA1677 | lipoprotein, putative                                        | 100 | 99  | 100 | 96  |
| BMA1678 | dihydrodipicolinate synthase                                 | 100 | 100 | 100 | 97  |
| BMA1679 | conserved hypothetical protein                               | 100 | 98  | 100 | 88  |
| BMA1680 | tryptophanyl-tRNA synthetase                                 | 100 | 100 | 100 | 99  |
| BMA1681 | peptidase, M50 family                                        | 100 | 99  | 100 | 98  |
| BMA1682 | Sua5/YciO/YrdC/YwIc family protein                           | 100 | 100 | 100 | 98  |
| BMA1683 | phosphoesterase, putative                                    | 100 | 100 | 100 | 96  |
| BMA1684 | hydrolase, alpha/beta fold family                            | 100 | 99  | 100 | 95  |
| BMA1685 | conserved hypothetical protein                               | 100 | 100 | 100 | 89  |
| BMA1686 | bacterial transferase hexapeptide repeat protein             | 100 | 98  | 100 | 96  |
| BMA1687 | 33 kda chaperonin                                            | 100 | 99  | 100 | 95  |
| BMA1688 | septum formation initiator family protein                    | 100 | 100 | 100 | 91  |
| BMA1689 | enolase                                                      | 100 | 100 | 100 | 99  |
| BMA1690 | 3-deoxy-8-phosphooctulonate synthase                         | 100 | 100 | 100 | 98  |
| BMA1691 | CTP synthase                                                 | 100 | 100 | 100 | 98  |
| BMA1692 | conserved hypothetical protein                               | 100 | 99  | 100 | 96  |
| BMA1693 | DNA internalization-related competence protein ComEC/Rec2    | 100 | 99  | 100 | 87  |
| BMA1694 | hydrolase, TatD family                                       | 100 | 99  | 100 | 94  |
| BMA1695 | ABC transporter, ATP-binding protein                         | 100 | 99  | 100 | 96  |
| BMA1696 | lipoprotein releasing system transmembrane protein, putative | 100 | 99  | 100 | 99  |
| BMA1698 | single-stranded-DNA-specific exonuclease RecJ                | 100 | 100 | 100 | 98  |
| BMA1699 | peptide chain release factor 2, programmed frameshift        | 100 | 98  | 100 | 90  |
| BMA1700 | lysyl-tRNA synthetase                                        | 100 | 99  | 100 | 96  |
| BMA1701 | conserved hypothetical protein                               | 100 | 100 | 100 | 95  |
| BMA1702 | conserved hypothetical protein                               | 100 | 100 | 100 | 97  |
| BMA1703 | ferredoxin, 2Fe-2S                                           | 100 | 100 | 100 | 95  |
| BMA1704 | chaperone protein HscA                                       | 100 | 99  | 100 | 96  |
| BMA1705 | co-chaperone Hsc20                                           | 100 | 100 | 100 | 95  |
| BMA1706 | iron-sulfur cluster assembly accessory protein               | 100 | 99  | 100 | 100 |
| BMA1707 | FeS cluster assembly scaffold IscU                           | 100 | 100 | 100 | 97  |



|           |                                                                                    |     |     |     |    |
|-----------|------------------------------------------------------------------------------------|-----|-----|-----|----|
| BMA1708   | cysteine desulfurase                                                               | 100 | 99  | 100 | 98 |
| BMA1709   | iron-sulfur cluster assembly transcription factor IscR                             | 100 | 100 | 100 | 98 |
| BMA1710   | low molecular weight protein-tyrosine-phosphatase                                  | 100 | 100 | 100 | 93 |
| BMA1711   | hypothetical protein                                                               | 100 | 100 | 100 | 89 |
| BMA1712   | iron-sulfur cluster-binding protein, putative                                      | 100 | 99  | 100 | 94 |
| BMA1713   | conserved hypothetical protein                                                     | 100 | 99  | 100 | 95 |
| BMA1714   | transcriptional regulator, IclR family                                             | 100 | 99  | 100 | 99 |
| BMA1716   | phasin family protein                                                              | 100 | 100 | 100 | 98 |
| BMA1717   | D-alanyl-D-alanine endopeptidase, putative                                         | 100 | 99  | 100 | 96 |
| BMA1719   | pyruvate dehydrogenase, E3 component, dihydrolipoamide dehydrogenase               | 100 | 99  | 100 | 94 |
| BMA1721   | pyruvate dehydrogenase, E1 component                                               | 100 | 100 | 100 | 96 |
| BMA1722   | sensory box histidine kinase                                                       | 100 | 99  | 100 | 97 |
| BMA1723   | DNA-binding response regulator, LuxR family                                        | 100 | 100 | 100 | 98 |
| BMA1724   | methylenetetrahydrofolate dehydrogenase/methenyltetrahydrofolate cyclohydrolase    | 100 | 99  | 100 | 98 |
| BMA1726   | oligopeptidase A                                                                   | 100 | 99  | 100 | 96 |
| BMA1727   | DNA polymerase IV                                                                  | 100 | 98  | 96  | 91 |
| BMA1729   | nitrate/nitrite transporter                                                        | 100 | 99  | 100 | 97 |
| BMA1730   | nitrate/nitrite transporter NarK                                                   | 100 | 99  | 100 | 97 |
| BMA1731   | nitrate reductase, alpha subunit                                                   | 100 | 99  | 100 | 98 |
| BMA1732   | nitrate reductase, beta subunit                                                    | 100 | 99  | 100 | 98 |
| BMA1733   | nitrate reductase, delta subunit                                                   | 100 | 99  | 100 | 95 |
| BMA1734   | nitrate reductase, gamma subunit                                                   | 100 | 100 | 100 | 98 |
| BMA1735   | nitrate/nitrite sensory protein NarX, putative                                     | 100 | 100 | 100 | 96 |
| BMA1736   | DNA-binding response regulator NarL                                                | 100 | 100 | 100 | 96 |
| BMA1738   | exodeoxyribonuclease III                                                           | 100 | 99  | 100 | 97 |
| BMA1740   | nitrogen regulation protein NR(I)                                                  | 100 | 100 | 100 | 96 |
| BMA1741   | nitrogen regulation protein                                                        | 100 | 99  | 100 | 97 |
| BMA1743   | glutamine synthetase, type I                                                       | 100 | 100 | 100 | 99 |
| BMA1744   | conserved hypothetical protein                                                     | 100 | 100 | 100 | 97 |
| BMA1745   | molybdopterin-binding protein                                                      | 100 | 100 | 99  | 97 |
| BMA1746   | membrane protein, putative                                                         | 100 | 99  | 100 | 96 |
| BMA1748   | membrane protein, putative                                                         | 100 | 99  | 100 | 96 |
| BMA1749   | conserved hypothetical protein                                                     | 100 | 100 | 100 | 97 |
| BMA1750   | ATP-dependent helicase HrpA                                                        | 100 | 99  | 100 | 95 |
| BMA1751   | amino-acid N-acetyltransferase                                                     | 100 | 100 | 100 | 99 |
| BMA1752   | conserved hypothetical protein                                                     | 100 | 100 | 99  | 97 |
| BMA1753   | major facilitator family transporter                                               | 100 | 99  | 100 | 93 |
| BMA1755   | acyl-CoA dehydrogenase domain protein                                              | 100 | 98  | 100 | 92 |
| BMA1756   | transcriptional regulator, LysR family                                             | 100 | 99  | 100 | 96 |
| BMA1761   | lipoprotein, putative                                                              | 100 | 100 | 100 | 97 |
| BMA1762   | lipoprotein, putative                                                              | 100 | 100 | 100 | 89 |
| BMA1763   | membrane protein, putative                                                         | 100 | 99  | 100 | 93 |
| BMA1767   | peptidyl-tRNA hydrolase, putative                                                  | 100 | 100 | 100 | 94 |
| BMA1769   | exodeoxyribonuclease V, beta subunit                                               | 100 | 99  | 100 | 93 |
| BMA1769.1 | exodeoxyribonuclease V, gamma subunit                                              | 100 | 99  | 100 | 94 |
| BMA1772   | membrane protein, putative                                                         | 100 | 99  | 100 | 96 |
| BMA1774   | amino acid permease                                                                | 100 | 99  | 100 | 96 |
| BMA1775   | hypothetical protein                                                               | 100 | 98  | 100 | 94 |
| BMA1777   | iron compound ABC transporter, periplasmic iron-compound-binding protein, putative | 100 | 99  | 100 | 95 |

|         |                                                              |     |     |     |     |
|---------|--------------------------------------------------------------|-----|-----|-----|-----|
| BMA1778 | iron compound ABC transporter, permease protein, putative    | 100 | 99  | 100 | 92  |
| BMA1779 | iron compound ABC transporter, ATP-binding protein, putative | 100 | 99  | 100 | 96  |
| BMA1780 | transcriptional regulator, AsnC family                       | 100 | 100 | 100 | 99  |
| BMA1783 | conserved hypothetical protein                               | 100 | 98  | 100 | 92  |
| BMA1784 | Rrf2 family protein                                          | 100 | 100 | 100 | 92  |
| BMA1785 | hypothetical protein                                         | 99  | 98  | 99  | 86  |
| BMA1786 | conserved hypothetical protein                               | 100 | 99  | 100 | 95  |
| BMA1794 | conserved hypothetical protein                               | 100 | 100 | 100 | 98  |
| BMA1796 | membrane protein, putative                                   | 100 | 100 | 100 | 97  |
| BMA1797 | conserved domain protein                                     | 100 | 99  | 100 | 91  |
| BMA1798 | conserved hypothetical protein                               | 100 | 99  | 100 | 95  |
| BMA1799 | conserved hypothetical protein                               | 100 | 100 | 100 | 96  |
| BMA1801 | aromatic aminotransferase                                    | 100 | 99  | 100 | 96  |
| BMA1803 | enoyl-CoA hydratase/isomerase family protein                 | 100 | 100 | 100 | 96  |
| BMA1804 | phosphoglycerate mutase, putative                            | 100 | 98  | 100 | 97  |
| BMA1805 | phosphotransferase enzyme family protein                     | 100 | 100 | 100 | 93  |
| BMA1806 | acyl-CoA dehydrogenase domain protein                        | 100 | 99  | 100 | 95  |
| BMA1809 | MaoC family protein                                          | 100 | 100 | 100 | 93  |
| BMA1810 | MoaC domain protein                                          | 100 | 99  | 98  | 93  |
| BMA1811 | acyl-CoA dehydrogenase domain protein                        | 100 | 99  | 100 | 92  |
| BMA1812 | acyl-CoA dehydrogenase domain protein                        | 100 | 99  | 100 | 96  |
| BMA1813 | conserved hypothetical protein                               | 100 | 100 | 100 | 97  |
| BMA1814 | pyrophosphatase, MutT/nudix family                           | 100 | 99  | 100 | 96  |
| BMA1815 | membrane protein, putative                                   | 100 | 99  | 100 | 93  |
| BMA1816 | NADH dehydrogenase I, N subunit                              | 100 | 100 | 100 | 98  |
| BMA1817 | NADH dehydrogenase I, M subunit                              | 100 | 100 | 100 | 97  |
| BMA1819 | NADH dehydrogenase I, K subunit                              | 100 | 100 | 100 | 100 |
| BMA1820 | NADH dehydrogenase I, J subunit                              | 100 | 100 | 100 | 97  |
| BMA1821 | NADH dehydrogenase I, I subunit                              | 100 | 100 | 100 | 98  |
| BMA1822 | NADH dehydrogenase I, H subunit                              | 100 | 100 | 100 | 99  |
| BMA1823 | NADH dehydrogenase I, G subunit                              | 100 | 99  | 100 | 96  |
| BMA1824 | NADH dehydrogenase I, F subunit                              | 100 | 99  | 100 | 99  |
| BMA1825 | NADH dehydrogenase I, E subunit                              | 100 | 100 | 100 | 100 |
| BMA1826 | NADH dehydrogenase I, D subunit                              | 100 | 100 | 100 | 99  |
| BMA1827 | NADH dehydrogenase I, C subunit                              | 100 | 100 | 100 | 98  |
| BMA1828 | NADH-quinone oxidoreductase, B subunit                       | 100 | 100 | 100 | 100 |
| BMA1829 | NADH dehydrogenase I, A subunit                              | 100 | 99  | 100 | 99  |
| BMA1831 | preprotein translocase, SecE subunit                         | 100 | 100 | 100 | 98  |
| BMA1832 | triosephosphate isomerase                                    | 100 | 99  | 100 | 91  |
| BMA1833 | oxidoreductase, zinc-binding dehydrogenase family protein    | 100 | 100 | 100 | 95  |
| BMA1834 | polyribonucleotide nucleotidyltransferase                    | 100 | 99  | 100 | 98  |
| BMA1835 | ribosomal protein S15                                        | 100 | 100 | 100 | 100 |
| BMA1836 | amino acid-binding protein, putative                         | 100 | 100 | 99  | 92  |
| BMA1838 | lipoprotein, putative                                        | 100 | 100 | 100 | 95  |
| BMA1839 | carbonic anhydrase                                           | 100 | 99  | 100 | 95  |
| BMA1840 | sulfate transporter, putative                                | 100 | 99  | 100 | 94  |
| BMA1844 | CDP-diacylglycerol--serine O-phosphatidyltransferase         | 100 | 99  | 100 | 99  |
| BMA1845 | phosphatidylserine decarboxylase-related protein             | 100 | 99  | 100 | 98  |
| BMA1846 | ketol-acid reductoisomerase                                  | 100 | 100 | 100 | 99  |

|         |                                                            |     |     |     |     |
|---------|------------------------------------------------------------|-----|-----|-----|-----|
| BMA1847 | acetolactate synthase, small subunit                       | 100 | 100 | 100 | 100 |
| BMA1848 | acetolactate synthase, large subunit, biosynthetic type    | 100 | 99  | 100 | 98  |
| BMA1850 | RNA polymerase sigma-70 factor, ECF subfamily              | 100 | 99  | 96  | 98  |
| BMA1851 | conserved hypothetical protein                             | 100 | 99  | 100 | 95  |
| BMA1852 | conserved hypothetical protein                             | 100 | 99  | 100 | 92  |
| BMA1853 | conserved hypothetical protein                             | 100 | 98  | 99  | 88  |
| BMA1854 | Ser/Thr protein phosphatase family protein                 | 100 | 100 | 100 | 97  |
| BMA1855 | glycosyl transferase, group 1 family protein               | 100 | 100 | 100 | 97  |
| BMA1856 | diacylglycerol kinase                                      | 100 | 99  | 100 | 93  |
| BMA1857 | transcriptional reguator, TetR family                      | 100 | 99  | 100 | 99  |
| BMA1858 | decarboxylase family protein                               | 100 | 100 | 100 | 96  |
| BMA1859 | glucose 1-dehydrogenase                                    | 100 | 99  | 100 | 94  |
| BMA1861 | membrane protein, putative                                 | 100 | 99  | 100 | 91  |
| BMA1862 | major facilitator family transporter                       | 100 | 99  | 100 | 90  |
| BMA1863 | ISBma1, transposase                                        | 100 | 98  | 100 | 98  |
| BMA1864 | amidase family protein                                     | 100 | 99  | 100 | 92  |
| BMA1865 | conserved hypothetical protein                             | 100 | 99  | 100 | 92  |
| BMA1866 | conserved hypothetical protein                             | 100 | 100 | 100 | 95  |
| BMA1867 | protozoan/cyanobacterial globin family protein             | 100 | 98  | 100 | 94  |
| BMA1869 | conserved hypothetical protein                             | 100 | 100 | 100 | 96  |
| BMA1870 | sugE protein                                               | 100 | 100 | 100 | 93  |
| BMA1872 | DNA-binding response regulator KdpE                        | 100 | 100 | 100 | 98  |
| BMA1874 | K+-transporting ATPase, C subunit                          | 100 | 100 | 99  | 94  |
| BMA1875 | K+-transporting ATPase, B subunit                          | 100 | 99  | 100 | 96  |
| BMA1876 | K+-transporting ATPase, A subunit                          | 100 | 99  | 100 | 93  |
| BMA1877 | potassium-transporting ATPase, KdpF subunit                | 100 | 100 | 100 | 100 |
| BMA1879 | quinone oxidoreductase                                     | 100 | 100 | 100 | 95  |
| BMA1881 | methylglyoxal synthase                                     | 100 | 100 | 100 | 96  |
| BMA1882 | oxidoreductase, short chain dehydrogenase/reductase family | 100 | 99  | 100 | 96  |
| BMA1883 | uracil phosphoribosyltransferase                           | 100 | 100 | 100 | 99  |
| BMA1884 | conserved hypothetical protein TIGR01033                   | 100 | 100 | 100 | 97  |
| BMA1885 | phosphoribosylamine--glycine ligase                        | 100 | 99  | 100 | 98  |
| BMA1886 | coproporphyrinogen III oxidase, aerobic                    | 100 | 99  | 100 | 95  |
| BMA1887 | nicotinate (nicotinamide) nucleotide adenylyltransferase   | 100 | 100 | 100 | 94  |
| BMA1888 | iojap domain protein                                       | 100 | 100 | 100 | 94  |
| BMA1889 | conserved hypothetical protein TIGR00246                   | 100 | 100 | 100 | 97  |
| BMA1890 | maf protein                                                | 100 | 100 | 100 | 94  |
| BMA1891 | ribonuclease G                                             | 100 | 99  | 100 | 98  |
| BMA1892 | xanthine/uracil permease family protein                    | 100 | 99  | 100 | 96  |
| BMA1893 | conserved domain protein                                   | 100 | 99  | 100 | 95  |
| BMA1897 | conserved hypothetical protein                             | 100 | 100 | 100 | 91  |
| BMA1899 | RNA polymerase sigma-70 factor, ECF family                 | 100 | 99  | 99  | 92  |
| BMA1900 | carboxymuconolactone decarboxylase family protein          | 100 | 100 | 100 | 95  |
| BMA1901 | hypothetical protein                                       | 100 | 99  | 100 | 86  |
| BMA1902 | major facilitator superfamily protein                      | 100 | 98  | 100 | 96  |
| BMA1905 | lipopolysaccharide core biosynthesis glycosyltransferase   | 100 | 100 | 100 | 90  |
| BMA1907 | lipopolysaccharide core biosynthesis heptosyltransferase   | 100 | 99  | 100 | 89  |
| BMA1908 | glycosyl transferase, group 1 family protein               | 100 | 98  | 100 | 87  |
| BMA1909 | membrane protein, putative                                 | 100 | 100 | 100 | 91  |

|           |                                                                |     |     |     |    |
|-----------|----------------------------------------------------------------|-----|-----|-----|----|
| BMA1910   | heptosyltransferase family protein                             | 100 | 100 | 99  | 90 |
| BMA1911   | lipooligosaccharide glycosyl transferase G                     | 100 | 99  | 99  | 89 |
| BMA1912   | ABC transporter, permease/ATP-binding protein                  | 100 | 100 | 100 | 98 |
| BMA1913   | DNA polymerase III, alpha subunit, form 1                      | 100 | 99  | 100 | 97 |
| BMA1914   | rhodanese-like domain protein                                  | 100 | 99  | 100 | 92 |
| BMA1915   | tRNA synthetases class I domain protein                        | 100 | 100 | 100 | 95 |
| BMA1917   | ATP-dependent RNA helicase RhIE                                | 100 | 100 | 100 | 97 |
| BMA1920.1 | conserved domain protein                                       | 100 | 100 | 99  | 89 |
| BMA1922   | phosphoribosylglycinamide formyltransferase 2                  | 100 | 99  | 100 | 95 |
| BMA1923   | conserved hypothetical protein                                 | 100 | 100 | 100 | 92 |
| BMA1926   | conserved hypothetical protein                                 | 100 | 99  | 100 | 95 |
| BMA1927   | glycosyl hydrolase, family 15                                  | 100 | 100 | 100 | 96 |
| BMA1928   | intracellular PHB depolymerase                                 | 100 | 99  | 100 | 95 |
| BMA1929   | transcriptional regulator, TetR family                         | 100 | 100 | 100 | 96 |
| BMA1930   | iron-sulfur cluster-binding protein                            | 100 | 99  | 99  | 88 |
| BMA1931   | endonuclease III                                               | 100 | 100 | 100 | 95 |
| BMA1933   | conserved hypothetical protein                                 | 100 | 99  | 100 | 96 |
| BMA1934   | ISBma1, transposase                                            | 100 | 98  | 100 | 98 |
| BMA1935   | cytochrome C4 family protein, authentic frameshift             | 100 | 99  | 100 | 96 |
| BMA1937   | conserved hypothetical protein                                 | 100 | 100 | 100 | 97 |
| BMA1938   | benzoate transport protein                                     | 100 | 99  | 100 | 95 |
| BMA1940   | transaldolase                                                  | 100 | 99  | 100 | 95 |
| BMA1941   | glyoxalase family protein                                      | 100 | 97  | 100 | 92 |
| BMA1942   | sodium:solute symporter family protein                         | 100 | 100 | 100 | 97 |
| BMA1943   | membrane protein, putative                                     | 100 | 100 | 100 | 93 |
| BMA1945   | conserved hypothetical protein                                 | 100 | 100 | 99  | 91 |
| BMA1946   | chorismate lyase family protein                                | 100 | 100 | 99  | 90 |
| BMA1947   | heat shock protein HtpG                                        | 100 | 100 | 100 | 98 |
| BMA1949   | transcriptional regulator, GntR family                         | 100 | 100 | 100 | 97 |
| BMA1950   | conserved hypothetical protein                                 | 100 | 98  | 98  | 86 |
| BMA1951   | membrane protein, putative                                     | 100 | 99  | 100 | 95 |
| BMA1952   | aminotransferase family protein                                | 100 | 99  | 100 | 95 |
| BMA1956   | DNA-binding protein                                            | 100 | 99  | 100 | 88 |
| BMA1957   | class II aldolase/adducin domain protein                       | 100 | 99  | 100 | 94 |
| BMA1958   | dihydrodipicolinate synthase, putative                         | 100 | 100 | 100 | 93 |
| BMA1959   | MOSC domain protein                                            | 100 | 99  | 100 | 92 |
| BMA1960   | hydrolase, alpha/beta fold family                              | 100 | 99  | 100 | 92 |
| BMA1961   | transcriptional regulator, LysR family                         | 100 | 100 | 99  | 91 |
| BMA1963   | copper resistance protein, putative                            | 100 | 99  | 98  | 93 |
| BMA1964   | ribosomal small subunit pseudouridine synthase A               | 100 | 100 | 100 | 95 |
| BMA1965   | conserved hypothetical protein                                 | 100 | 99  | 100 | 92 |
| BMA1966   | CDP-6-deoxy-delta-3,4-glucoseen reductase, putative            | 100 | 100 | 100 | 98 |
| BMA1967   | acetylornithine aminotransferase                               | 100 | 99  | 100 | 97 |
| BMA1968   | acetyltransferase, GNAT family                                 | 100 | 99  | 97  | 88 |
| BMA1969   | conserved hypothetical protein                                 | 100 | 99  | 100 | 95 |
| BMA1970   | branched-chain amino acid ABC transporter, ATP-binding protein | 100 | 99  | 100 | 97 |
| BMA1971   | branched-chain amino acid ABC transporter, ATP-binding protein | 100 | 100 | 100 | 99 |
| BMA1972   | branched-chain amino acid ABC transporter, permease protein    | 100 | 100 | 100 | 96 |
| BMA1973   | branched-chain amino acid ABC transporter, permease protein    | 100 | 99  | 100 | 98 |

|         |                                                            |     |     |     |     |
|---------|------------------------------------------------------------|-----|-----|-----|-----|
| BMA1976 | polysaccharide synthase family protein                     | 100 | 100 | 100 | 96  |
| BMA1980 | glycosyl transferase, putative                             | 100 | 99  | 100 | 89  |
| BMA1981 | O-antigen methyl transferase, putative                     | 100 | 99  | 100 | 96  |
| BMA1982 | glycosyl transferase, putative                             | 100 | 99  | 100 | 96  |
| BMA1983 | NAD-dependent epimerase/dehydratase family protein         | 100 | 99  | 100 | 97  |
| BMA1984 | O-antigen acetylase, putative                              | 100 | 100 | 100 | 95  |
| BMA1985 | polysaccharide ABC transporter, ATP-binding protein        | 100 | 99  | 100 | 97  |
| BMA1986 | polysaccharide ABC transporter, permease protein, putative | 100 | 100 | 100 | 97  |
| BMA1987 | dTDP-4-dehydrorhamnose reductase                           | 100 | 100 | 100 | 95  |
| BMA1988 | dTDP-4-dehydrorhamnose 3,5-epimerase                       | 100 | 100 | 100 | 97  |
| BMA1989 | glucose-1-phosphate thymidyltransferase                    | 100 | 99  | 100 | 96  |
| BMA1990 | dTDP-glucose 4,6-dehydratase                               | 100 | 99  | 100 | 97  |
| BMA1991 | bis(5'-nucleosyl)-tetraphosphatase (symmetrical)           | 100 | 99  | 100 | 95  |
| BMA1992 | acyltransferase family protein                             | 100 | 100 | 100 | 92  |
| BMA1993 | aspartate carbamoyltransferase, 44 kDa non-catalytic chain | 100 | 100 | 100 | 98  |
| BMA1994 | aspartate carbamoyltransferase                             | 100 | 100 | 100 | 99  |
| BMA1995 | pyrimidine operon regulatory protein PyrR                  | 100 | 100 | 100 | 96  |
| BMA1996 | conserved hypothetical protein TIGR00250                   | 100 | 100 | 100 | 95  |
| BMA1997 | conserved hypothetical protein                             | 100 | 100 | 100 | 99  |
| BMA1998 | hypothetical protein                                       | 100 | 99  | 100 | 91  |
| BMA1999 | rubredoxin                                                 | 100 | 100 | 100 | 100 |
| BMA2000 | phosphomethylpyrimidine kinase ThiD, putative              | 100 | 100 | 100 | 100 |
| BMA2001 | chaperonin, 60 kDa                                         | 99  | 99  | 99  | 99  |
| BMA2002 | chaperonin, 10 kDa                                         | 100 | 100 | 100 | 98  |
| BMA2005 | transcriptional regulator family protein                   | 100 | 100 | 99  | 90  |
| BMA2006 | alcohol dehydrogenase, zinc-containing                     | 100 | 100 | 100 | 94  |
| BMA2009 | activator protein, putative                                | 100 | 100 | 100 | 93  |
| BMA2010 | outer membrane protein, OmpW family                        | 100 | 99  | 100 | 96  |
| BMA2011 | lipoprotein, putative                                      | 100 | 99  | 100 | 96  |
| BMA2012 | hypothetical protein                                       | 100 | 99  | 100 | 93  |
| BMA2018 | metallo-beta-lactamase family protein                      | 100 | 99  | 100 | 95  |
| BMA2019 | DNA-binding protein                                        | 100 | 99  | 98  | 88  |
| BMA2020 | acetyltransferase, GNAT family                             | 100 | 98  | 100 | 90  |
| BMA2021 | LysE family protein                                        | 100 | 99  | 100 | 94  |
| BMA2022 | glycerophosphoryl diester phosphodiesterase family protein | 100 | 99  | 100 | 95  |
| BMA2023 | drug resistance transporter, EmrB/QacA subfamily           | 100 | 99  | 100 | 95  |
| BMA2024 | membrane protein, putative                                 | 100 | 100 | 100 | 94  |
| BMA2026 | serine-type carboxypeptidase family protein                | 100 | 99  | 100 | 95  |
| BMA2028 | D-(-)-3-hydroxybutyrate-oligomer hydrolase                 | 100 | 99  | 100 | 94  |
| BMA2031 | DSBA-like thioredoxin domain protein                       | 100 | 100 | 100 | 97  |
| BMA2032 | transcriptional regulator, LysR family                     | 100 | 99  | 100 | 95  |
| BMA2033 | iron compound ABC transporter, permease protein            | 100 | 97  | 100 | 96  |
| BMA2035 | iron compound ABC transporter, ATP-binding protein         | 100 | 99  | 100 | 99  |
| BMA2036 | TonB-dependent siderophore receptor family protein         | 100 | 98  | 100 | 94  |
| BMA2038 | conserved hypothetical protein                             | 100 | 99  | 100 | 95  |
| BMA2039 | conserved hypothetical protein                             | 100 | 99  | 100 | 96  |
| BMA2041 | xanthine dehydrogenase, C-terminal subunit                 | 100 | 99  | 100 | 96  |
| BMA2042 | xanthine dehydrogenase, N-terminal subunit                 | 100 | 99  | 100 | 94  |
| BMA2043 | transporter, putative                                      | 100 | 100 | 99  | 96  |

|         |                                                             |     |     |     |     |
|---------|-------------------------------------------------------------|-----|-----|-----|-----|
| BMA2045 | membrane protein, putative                                  | 100 | 99  | 100 | 94  |
| BMA2046 | transcriptional regulator, AraC family                      | 100 | 99  | 100 | 95  |
| BMA2047 | alanine--glyoxylate aminotransferase                        | 100 | 100 | 100 | 97  |
| BMA2049 | transcriptional regulator, LysR family                      | 100 | 100 | 100 | 98  |
| BMA2050 | D-lactate dehydrogenase                                     | 100 | 99  | 100 | 98  |
| BMA2051 | nitroreductase family protein                               | 100 | 100 | 100 | 96  |
| BMA2052 | major facilitator family transporter                        | 100 | 99  | 100 | 95  |
| BMA2053 | transporter, putative                                       | 100 | 99  | 100 | 94  |
| BMA2055 | fumarylacetoacetase                                         | 100 | 99  | 100 | 92  |
| BMA2056 | homogentisate 1,2-dioxygenase                               | 100 | 100 | 100 | 98  |
| BMA2057 | 4-hydroxyphenylacetate transporter, putative                | 100 | 99  | 100 | 96  |
| BMA2058 | conserved hypothetical protein                              | 96  | 98  | 96  | 100 |
| BMA2059 | FAD-binding monooxygenase, PheA/TfdB family                 | 100 | 99  | 100 | 95  |
| BMA2060 | metallo-beta-lactamase family protein                       | 100 | 100 | 100 | 97  |
| BMA2061 | EAL domain protein                                          | 100 | 100 | 96  | 96  |
| BMA2062 | conserved hypothetical protein                              | 100 | 99  | 100 | 91  |
| BMA2063 | transcriptional regulator, lclR family                      | 100 | 100 | 100 | 94  |
| BMA2064 | glutaryl-CoA dehydrogenase                                  | 100 | 100 | 100 | 96  |
| BMA2066 | antioxidant, AhpC/Tsa family                                | 100 | 100 | 100 | 98  |
| BMA2067 | conserved hypothetical protein                              | 100 | 99  | 100 | 97  |
| BMA2068 | conserved hypothetical protein                              | 100 | 100 | 100 | 93  |
| BMA2069 | hypothetical protein                                        | 100 | 100 | 100 | 92  |
| BMA2071 | conserved hypothetical protein                              | 100 | 100 | 100 | 88  |
| BMA2074 | conserved hypothetical protein TIGR00244                    | 100 | 100 | 100 | 98  |
| BMA2075 | serine hydroxymethyltransferase                             | 100 | 100 | 100 | 98  |
| BMA2076 | oxidoreductase, short-chain dehydrogenase/reductase family  | 100 | 100 | 100 | 96  |
| BMA2077 | conserved hypothetical protein TIGR00051                    | 100 | 99  | 100 | 91  |
| BMA2078 | tolQ protein                                                | 100 | 100 | 100 | 99  |
| BMA2079 | tolR protein                                                | 100 | 99  | 100 | 97  |
| BMA2080 | conserved hypothetical protein                              | 100 | 100 | 100 | 94  |
| BMA2081 | tolB protein                                                | 100 | 99  | 100 | 97  |
| BMA2082 | outer membrane protein, OmpA family                         | 100 | 100 | 100 | 98  |
| BMA2083 | conserved hypothetical protein                              | 100 | 99  | 100 | 98  |
| BMA2088 | ISBma1, transposase, truncation                             | 100 | 98  | 100 | 99  |
| BMA2089 | outer membrane porin, putative                              | 100 | 100 | 100 | 96  |
| BMA2090 | ISBma1, transposase                                         | 100 | 98  | 100 | 98  |
| BMA2091 | transcription elongation factor GreB                        | 100 | 100 | 100 | 95  |
| BMA2094 | guanosine-3',5'-bis(diphosphate) 3'-pyrophosphohydrolase    | 100 | 100 | 100 | 98  |
| BMA2095 | DNA-directed RNA polymerase, omega subunit                  | 100 | 100 | 99  | 100 |
| BMA2096 | guanylate kinase                                            | 100 | 100 | 100 | 96  |
| BMA2097 | conserved hypothetical protein TIGR00255                    | 100 | 100 | 100 | 98  |
| BMA2098 | ribonuclease PH                                             | 100 | 100 | 95  | 96  |
| BMA2099 | HAM1 protein                                                | 100 | 100 | 100 | 93  |
| BMA2100 | oxygen-independent coproporphyrinogen III oxidase, putative | 100 | 100 | 100 | 96  |
| BMA2105 | TonB domain protein                                         | 100 | 99  | 100 | 92  |
| BMA2106 | metabolite:proton symporter family protein                  | 100 | 99  | 100 | 95  |
| BMA2107 | hypothetical protein                                        | 100 | 100 | 100 | 90  |
| BMA2108 | lipopolysaccharide heptosyltransferase I                    | 100 | 98  | 100 | 93  |
| BMA2109 | voltage gated chloride channel family protein               | 100 | 98  | 100 | 87  |

|           |                                                                                                |     |     |     |     |
|-----------|------------------------------------------------------------------------------------------------|-----|-----|-----|-----|
| BMA2109.1 | lipoprotein, putative                                                                          | 100 | 100 | 100 | 97  |
| BMA2110   | conserved hypothetical protein                                                                 | 100 | 100 | 100 | 88  |
| BMA2111   | cell division topological specificity factor MinE                                              | 100 | 100 | 100 | 100 |
| BMA2112   | septum site-determining protein MinD                                                           | 100 | 100 | 100 | 98  |
| BMA2113   | septum site-determining protein MinC                                                           | 100 | 99  | 100 | 91  |
| BMA2116   | conserved hypothetical protein                                                                 | 100 | 98  | 100 | 92  |
| BMA2118   | seryl-tRNA synthetase                                                                          | 100 | 100 | 100 | 99  |
| BMA2119   | conserved hypothetical protein                                                                 | 100 | 100 | 100 | 89  |
| BMA2120   | ATPase, AAA family protein                                                                     | 100 | 100 | 97  | 98  |
| BMA2121   | outer membrane lipoprotein carrier protein LolA                                                | 100 | 100 | 100 | 95  |
| BMA2122   | cell division protein FtsK                                                                     | 100 | 99  | 100 | 97  |
| BMA2123   | thioredoxin-disulfide reductase                                                                | 100 | 100 | 100 | 97  |
| BMA2125   | membrane protein, putative                                                                     | 100 | 99  | 100 | 95  |
| BMA2126   | maltose ABC transporter, ATP-binding protein, putative                                         | 100 | 99  | 100 | 99  |
| BMA2127   | maltose ABC transporter, permease protein, putative                                            | 100 | 100 | 100 | 97  |
| BMA2128   | maltose ABC transporter, permease protein, putative                                            | 100 | 99  | 100 | 97  |
| BMA2129   | maltose ABC transporter, periplasmic maltose-binding protein                                   | 100 | 100 | 100 | 98  |
| BMA2130   | glucose-6-phosphate 1-dehydrogenase                                                            | 100 | 100 | 100 | 98  |
| BMA2131   | 6-phosphogluconolactonase                                                                      | 100 | 99  | 100 | 97  |
| BMA2132   | glucokinase/transcriptional regulator, RpiR family, fusion                                     | 100 | 99  | 100 | 98  |
| BMA2134   | amino acid ABC transporter, periplasmic amino acid-binding protein                             | 100 | 99  | 100 | 97  |
| BMA2135   | amino acid ABC transporter, permease protein, His/Glu/Gln/Arg/opine family                     | 100 | 99  | 100 | 94  |
| BMA2136   | amino acid ABC transporter, ATP-binding protein                                                | 100 | 99  | 100 | 94  |
| BMA2139   | drug resistance transporter, Bcr/CflA family                                                   | 100 | 97  | 100 | 92  |
| BMA2141   | hypothetical protein                                                                           | 100 | 100 | 100 | 94  |
| BMA2142   | glutamate-1-semialdehyde-2,1-aminomutase                                                       | 100 | 100 | 100 | 99  |
| BMA2143   | riboflavin biosynthesis protein RibD                                                           | 100 | 98  | 100 | 96  |
| BMA2144   | riboflavin synthase, alpha subunit                                                             | 100 | 100 | 100 | 92  |
| BMA2145   | bifunctional riboflavin biosynthesis protein RibBA                                             | 100 | 99  | 100 | 97  |
| BMA2146   | 6,7-dimethyl-8-ribityllumazine synthase                                                        | 100 | 100 | 100 | 100 |
| BMA2147   | N utilization substance protein B                                                              | 100 | 100 | 100 | 100 |
| BMA2148   | aspartate aminotransferase                                                                     | 100 | 100 | 100 | 98  |
| BMA2149   | transglycosylase SLT domain protein                                                            | 100 | 100 | 100 | 94  |
| BMA2151   | 3-octaprenyl-4-hydroxybenzoate carboxy-lyase                                                   | 100 | 99  | 100 | 97  |
| BMA2152   | LysE family protein                                                                            | 100 | 98  | 100 | 93  |
| BMA2154   | serine/threonine dehydratase family protein                                                    | 100 | 99  | 100 | 94  |
| BMA2158   | membrane protein, putative                                                                     | 100 | 100 | 100 | 96  |
| BMA2159   | conserved hypothetical protein                                                                 | 100 | 98  | 97  | 93  |
| BMA2160   | crcB protein                                                                                   | 100 | 99  | 100 | 96  |
| BMA2163   | serine protease, subtilase family                                                              | 100 | 99  | 100 | 90  |
| BMA2167   | tRNA (guanine-N(7)-)-methyltransferase                                                         | 100 | 99  | 100 | 88  |
| BMA2168   | undecaprenol kinase, putative                                                                  | 100 | 100 | 100 | 94  |
| BMA2169   | conserved hypothetical protein                                                                 | 100 | 100 | 100 | 97  |
| BMA2170   | conserved hypothetical protein, UPF0153 family                                                 | 100 | 100 | 100 | 92  |
| BMA2171   | oxygen-independent coproporphyrinogen III oxidase                                              | 100 | 99  | 100 | 96  |
| BMA2173   | protein-L-isoaspartate O-methyltransferase, putative                                           | 100 | 99  | 100 | 97  |
| BMA2174   | rhodanese-like domain protein                                                                  | 100 | 99  | 100 | 94  |
| BMA2175   | omega-amino acid--pyruvate aminotransferase                                                    | 100 | 99  | 100 | 97  |
| BMA2176   | branched-chain amino acid ABC transporter, periplasmic branched-chain amino acid-binding prote | 100 | 99  | 100 | 97  |

|         |                                                                                 |     |     |     |     |
|---------|---------------------------------------------------------------------------------|-----|-----|-----|-----|
| BMA2177 | branched-chain amino acid ABC transporter, permease protein, putative           | 100 | 99  | 100 | 94  |
| BMA2178 | branched-chain ABC transporter, permease protein, putative                      | 100 | 99  | 100 | 96  |
| BMA2179 | branched-chain amino acid ABC transporter, ATP binding protein, putative        | 100 | 100 | 98  | 93  |
| BMA2180 | branched-chain amino acid ABC transporter, ATP-binding protein, putative        | 100 | 99  | 100 | 96  |
| BMA2181 | urease accessory protein UreD                                                   | 100 | 100 | 100 | 92  |
| BMA2182 | urease, gamma subunit                                                           | 100 | 100 | 100 | 98  |
| BMA2183 | urease, beta subunit                                                            | 100 | 100 | 100 | 94  |
| BMA2184 | urease, alpha subunit                                                           | 100 | 99  | 100 | 97  |
| BMA2186 | urease accessory protein UreF                                                   | 100 | 100 | 100 | 94  |
| BMA2187 | urease accessory protein UreG                                                   | 100 | 100 | 100 | 95  |
| BMA2188 | 3-deoxy-D-manno-octulosonic-acid transferase                                    | 100 | 99  | 100 | 93  |
| BMA2189 | conserved hypothetical protein                                                  | 100 | 99  | 100 | 96  |
| BMA2190 | heptosyltransferase I                                                           | 100 | 99  | 100 | 96  |
| BMA2191 | phosphoglucomutase/phosphomannomutase family protein                            | 100 | 99  | 100 | 97  |
| BMA2192 | membrane protein, putative                                                      | 100 | 100 | 100 | 96  |
| BMA2193 | glycosyl transferase, group 2 family protein                                    | 100 | 99  | 100 | 94  |
| BMA2194 | glycosyl transferase, group 1 family protein                                    | 100 | 100 | 100 | 97  |
| BMA2195 | UDP-glucose 4-epimerase                                                         | 100 | 99  | 100 | 97  |
| BMA2196 | glycosyl transferase family protein                                             | 100 | 100 | 100 | 98  |
| BMA2205 | rubredoxin                                                                      | 100 | 100 | 100 | 95  |
| BMA2207 | ABC transporter, ATP-binding protein                                            | 100 | 99  | 100 | 96  |
| BMA2208 | DNA topoisomerase IV, subunit B                                                 | 100 | 100 | 100 | 99  |
| BMA2209 | DNA topoisomerase IV, A subunit                                                 | 100 | 99  | 100 | 98  |
| BMA2211 | conserved hypothetical protein                                                  | 100 | 99  | 100 | 96  |
| BMA2212 | transcriptional regulator, LysR family                                          | 100 | 99  | 100 | 96  |
| BMA2213 | membrane protein, putative                                                      | 100 | 99  | 100 | 94  |
| BMA2219 | acetylpolyamine aminohydrolase                                                  | 100 | 99  | 99  | 90  |
| BMA2220 | chromate transport protein, putative                                            | 100 | 99  | 100 | 94  |
| BMA2221 | EAL/GGDEF domain protein                                                        | 100 | 100 | 100 | 96  |
| BMA2222 | phenazine biosynthesis protein phzF, putative                                   | 100 | 99  | 100 | 92  |
| BMA2223 | endoribonuclease, L-PSP family                                                  | 100 | 100 | 100 | 98  |
| BMA2228 | hydroxymethylbutenyl pyrophosphate reductase                                    | 100 | 100 | 100 | 99  |
| BMA2229 | peptidyl-prolyl cis-trans isomerase, FKBP-type                                  | 100 | 99  | 100 | 96  |
| BMA2230 | DNA repair protein RadC                                                         | 100 | 100 | 100 | 86  |
| BMA2231 | ribosomal protein L28                                                           | 100 | 100 | 100 | 100 |
| BMA2232 | ribosomal protein L33                                                           | 100 | 100 | 100 | 100 |
| BMA2233 | L-aspartate oxidase                                                             | 100 | 99  | 100 | 97  |
| BMA2235 | nicotinate-nucleotide pyrophosphorylase                                         | 100 | 99  | 100 | 94  |
| BMA2236 | quinolinate synthetase complex, A subunit                                       | 100 | 100 | 100 | 94  |
| BMA2237 | fatty acid desaturase family protein                                            | 100 | 99  | 100 | 96  |
| BMA2238 | mechanosensitive ion channel family protein                                     | 100 | 99  | 100 | 95  |
| BMA2239 | NOL1/NOP2/sun family protein                                                    | 100 | 99  | 100 | 97  |
| BMA2240 | phosphoribosylglycinamide formyltransferase                                     | 100 | 99  | 100 | 96  |
| BMA2241 | riboflavin biosynthesis protein RibF                                            | 100 | 99  | 100 | 97  |
| BMA2242 | isoleucyl-tRNA synthetase                                                       | 100 | 99  | 100 | 97  |
| BMA2243 | lipoprotein signal peptidase                                                    | 100 | 100 | 100 | 99  |
| BMA2244 | phosphopantothenoylecysteine decarboxylase/phosphopantothenate--cysteine ligase | 100 | 99  | 100 | 96  |
| BMA2245 | deoxyuridine 5'-triphosphate nucleotidohydrolase                                | 100 | 100 | 99  | 96  |
| BMA2246 | membrane protein, putative                                                      | 100 | 99  | 100 | 91  |



|           |                                                                      |     |     |     |     |
|-----------|----------------------------------------------------------------------|-----|-----|-----|-----|
| BMA2248   | membrane protein, putative                                           | 100 | 97  | 100 | 92  |
| BMA2251   | conserved hypothetical protein                                       | 100 | 98  | 100 | 90  |
| BMA2252   | translation elongation factor G                                      | 100 | 99  | 100 | 98  |
| BMA2256   | oxidoreductase, aldo/keto reductase family                           | 100 | 99  | 100 | 93  |
| BMA2257   | transcriptional regulator, GntR family                               | 100 | 100 | 100 | 99  |
| BMA2259   | drug resistance transporter, EmrB/QacA family                        | 100 | 100 | 100 | 97  |
| BMA2261   | EAL domain protein                                                   | 100 | 99  | 100 | 97  |
| BMA2262   | conserved hypothetical protein                                       | 100 | 99  | 100 | 90  |
| BMA2264   | 2-dehydropantoate 2-reductase                                        | 100 | 99  | 100 | 89  |
| BMA2265   | membrane protein, putative                                           | 100 | 99  | 100 | 92  |
| BMA2266   | transcriptional regulator, putative                                  | 100 | 100 | 100 | 89  |
| BMA2267   | chromate transport protein                                           | 100 | 99  | 100 | 93  |
| BMA2271   | superoxide dismutase                                                 | 100 | 99  | 100 | 98  |
| BMA2272   | exodeoxyribonuclease VII, large subunit                              | 100 | 99  | 100 | 95  |
| BMA2273   | tetraacyldisaccharide 4'-kinase                                      | 100 | 99  | 100 | 97  |
| BMA2274   | conserved hypothetical protein                                       | 100 | 98  | 100 | 94  |
| BMA2275   | 3-deoxy-D-manno-octulosonate cytidyltransferase                      | 100 | 100 | 100 | 97  |
| BMA2277   | adenylate kinase                                                     | 100 | 100 | 100 | 97  |
| BMA2279   | cold-shock domain family protein                                     | 100 | 100 | 100 | 100 |
| BMA2280   | ATP-dependent Clp protease adaptor protein ClpS                      | 100 | 100 | 100 | 98  |
| BMA2281   | ATP-dependent Clp protease, ATP-binding subunit ClpA                 | 100 | 100 | 100 | 98  |
| BMA2282   | amino acid permease, truncation                                      | 100 | 99  | 100 | 96  |
| BMA2284.1 | hypothetical protein                                                 | 100 | 100 | 100 | 91  |
| BMA2286   | hypothetical protein                                                 | 100 | 100 | 100 | 86  |
| BMA2287   | 8-amino-7-oxononanoate synthase, putative                            | 100 | 100 | 100 | 95  |
| BMA2311   | yafJ protein, putative                                               | 100 | 100 | 100 | 97  |
| BMA2312   | mechanosensitive ion channel YggB                                    | 100 | 99  | 100 | 95  |
| BMA2313   | dedA family protein                                                  | 100 | 99  | 100 | 95  |
| BMA2314   | mismatch repair protein MutL                                         | 100 | 100 | 100 | 93  |
| BMA2315   | tRNA delta(2)-isopentenylpyrophosphate transferase                   | 100 | 99  | 100 | 93  |
| BMA2316   | conserved hypothetical protein                                       | 100 | 97  | 100 | 88  |
| BMA2317   | phosphoribosylformylglycinamide cyclo-ligase                         | 100 | 99  | 100 | 98  |
| BMA2318   | conserved hypothetical protein                                       | 100 | 99  | 100 | 98  |
| BMA2319   | HAD-superfamily subfamily IB hydrolase, putative                     | 100 | 100 | 100 | 99  |
| BMA2320   | polyA polymerase                                                     | 100 | 99  | 100 | 95  |
| BMA2321   | 2-amino-4-hydroxy-6-hydroxymethyl-dihydropteridine pyrophosphokinase | 100 | 99  | 100 | 94  |
| BMA2322   | deoxynucleoside kinase family protein                                | 100 | 99  | 100 | 97  |
| BMA2323   | 3-methyl-2-oxobutanoate hydroxymethyltransferase                     | 100 | 99  | 100 | 97  |
| BMA2324   | chorismate binding enzyme                                            | 100 | 100 | 100 | 90  |
| BMA2325   | chaperone protein DnaJ                                               | 100 | 99  | 100 | 97  |
| BMA2326   | chaperone protein DnaK                                               | 100 | 100 | 100 | 97  |
| BMA2328   | co-chaperone GrpE                                                    | 100 | 100 | 100 | 95  |
| BMA2329   | heat shock protein 15                                                | 100 | 100 | 100 | 96  |
| BMA2330   | ferrochelatase                                                       | 100 | 99  | 100 | 97  |
| BMA2331   | heat-inducible transcription repressor HrcA                          | 100 | 100 | 100 | 98  |
| BMA2332   | inorganic polyphosphate/ATP-NAD kinase                               | 100 | 99  | 100 | 97  |
| BMA2333   | DNA repair protein RecN                                              | 100 | 99  | 100 | 98  |
| BMA2334   | glutamate-ammonia-ligase adenyltransferase                           | 100 | 99  | 100 | 96  |
| BMA2335   | conserved hypothetical protein                                       | 100 | 99  | 100 | 95  |

|         |                                                                              |     |     |     |     |
|---------|------------------------------------------------------------------------------|-----|-----|-----|-----|
| BMA2336 | hydrolase, carbon-nitrogen family                                            | 100 | 99  | 100 | 97  |
| BMA2337 | tldD protein                                                                 | 100 | 100 | 100 | 97  |
| BMA2339 | phospho-2-dehydro-3-deoxyheptonate aldolase                                  | 100 | 99  | 100 | 99  |
| BMA2341 | ribosomal protein L13                                                        | 100 | 99  | 100 | 99  |
| BMA2342 | ribosomal protein S9                                                         | 100 | 99  | 100 | 96  |
| BMA2343 | iron-sulfur cluster assembly accessory protein                               | 100 | 100 | 100 | 100 |
| BMA2344 | transcriptional regulator, AraC family                                       | 100 | 99  | 100 | 91  |
| BMA2345 | glutathione S-transferase, putative                                          | 100 | 100 | 100 | 93  |
| BMA2346 | glutathione S-transferase, putative                                          | 100 | 99  | 100 | 95  |
| BMA2347 | conserved hypothetical protein                                               | 100 | 99  | 100 | 90  |
| BMA2348 | tyrosyl-tRNA synthetase                                                      | 100 | 99  | 100 | 98  |
| BMA2349 | D-tyrosyl-tRNA(Tyr) deacylase                                                | 100 | 100 | 100 | 100 |
| BMA2350 | phosphoglycerate mutase, putative                                            | 100 | 98  | 100 | 92  |
| BMA2352 | conserved hypothetical protein                                               | 100 | 99  | 100 | 95  |
| BMA2353 | Holliday junction DNA helicase RuvB                                          | 100 | 100 | 100 | 98  |
| BMA2354 | Holliday junction DNA helicase RuvA                                          | 100 | 100 | 100 | 97  |
| BMA2355 | crossover junction endodeoxyribonuclease RuvC                                | 100 | 100 | 100 | 98  |
| BMA2356 | phosphoribosylaminoimidazolecarboxamide formyltransferase/IMP cyclohydrolase | 100 | 99  | 100 | 98  |
| BMA2357 | factor-for-inversion stimulation protein                                     | 100 | 100 | 100 | 100 |
| BMA2358 | dihydrouridine synthase                                                      | 100 | 100 | 100 | 96  |
| BMA2359 | 2-octaprenyl-6-methoxyphenol hydroxylase                                     | 100 | 99  | 100 | 93  |
| BMA2360 | Xaa-Pro aminopeptidase                                                       | 100 | 98  | 100 | 95  |
| BMA2361 | glutathione S-transferase                                                    | 100 | 100 | 100 | 98  |
| BMA2363 | glutamate synthase domain protein                                            | 100 | 99  | 100 | 97  |
| BMA2364 | tRNA (5-methylaminomethyl-2-thiouridylate)-methyltransferase                 | 100 | 99  | 100 | 94  |
| BMA2365 | NUDIX domain protein                                                         | 100 | 100 | 100 | 92  |
| BMA2366 | NAD(P) transhydrogenase, alpha-1 subunit                                     | 100 | 100 | 100 | 98  |
| BMA2367 | NAD(P) transhydrogenase, alpha-2 subunit                                     | 100 | 100 | 100 | 97  |
| BMA2368 | NAD(P) transhydrogenase, beta subunit                                        | 100 | 99  | 100 | 98  |
| BMA2370 | conserved hypothetical protein                                               | 100 | 100 | 100 | 97  |
| BMA2371 | conserved hypothetical protein                                               | 100 | 99  | 100 | 94  |
| BMA2374 | THUMP domain protein                                                         | 100 | 100 | 100 | 96  |
| BMA2375 | membrane proten, putative                                                    | 100 | 99  | 100 | 98  |
| BMA2378 | paraquat-inducible protein B                                                 | 100 | 99  | 100 | 97  |
| BMA2379 | paraquat-inducible protein A, authentic frameshift                           | 100 | 97  | 100 | 90  |
| BMA2380 | cytochrome b561, putative                                                    | 100 | 100 | 100 | 97  |
| BMA2381 | conserved hypothetical protein                                               | 100 | 99  | 100 | 96  |
| BMA2382 | Ycel-like family protein                                                     | 100 | 100 | 100 | 98  |
| BMA2383 | membrane protein, putative                                                   | 100 | 97  | 99  | 89  |
| BMA2384 | protein-export membrane protein SecF                                         | 100 | 98  | 100 | 97  |
| BMA2385 | protein-export membrane protein SecD                                         | 100 | 99  | 100 | 99  |
| BMA2386 | preprotein translocase, YajC subunit                                         | 100 | 99  | 100 | 97  |
| BMA2387 | queueine tRNA-ribosyltransferase                                             | 100 | 100 | 100 | 97  |
| BMA2388 | S-adenosylmethionine:tRNA ribosyltransferase-isomerase                       | 100 | 98  | 100 | 94  |
| BMA2389 | ATP-dependent DNA helicase RecG                                              | 100 | 99  | 100 | 97  |
| BMA2390 | oxidative stress regulatory protein OxyR                                     | 100 | 99  | 100 | 98  |
| BMA2391 | catalase/peroxidase HPI                                                      | 100 | 99  | 100 | 95  |
| BMA2394 | ferritin-like domain protein                                                 | 100 | 100 | 100 | 99  |
| BMA2396 | 4-hydroxybenzoate polyprenyl transferase                                     | 100 | 100 | 99  | 93  |

|         |                                                                                                  |     |     |     |     |
|---------|--------------------------------------------------------------------------------------------------|-----|-----|-----|-----|
| BMA2410 | pyrroline-5-carboxylate reductase                                                                | 100 | 99  | 100 | 94  |
| BMA2411 | conserved hypothetical protein TIGR00044                                                         | 96  | 99  | 95  | 93  |
| BMA2412 | glycolate oxidase, iron-sulfur subunit                                                           | 100 | 99  | 100 | 97  |
| BMA2413 | glycolate oxidase, subunit GlcE                                                                  | 100 | 99  | 100 | 97  |
| BMA2414 | glycolate oxidase, subunit GlcD                                                                  | 100 | 99  | 100 | 98  |
| BMA2415 | glycolate oxidase, subunit GlcD, putative                                                        | 100 | 99  | 100 | 97  |
| BMA2416 | ATP:cob(I)alamin adenosyltransferase, putative                                                   | 100 | 100 | 97  | 94  |
| BMA2417 | flavoheмоprotein                                                                                 | 100 | 99  | 100 | 96  |
| BMA2420 | OsmC/Ohr family protein                                                                          | 100 | 100 | 100 | 97  |
| BMA2422 | dihydroorotase, homodimeric type                                                                 | 100 | 100 | 100 | 96  |
| BMA2423 | conserved hypothetical protein                                                                   | 100 | 100 | 100 | 95  |
| BMA2434 | glutamate/aspartate ABC transporter, ATP-binding protein                                         | 100 | 100 | 100 | 99  |
| BMA2435 | glutamate/aspartate ABC transporter, permease protein                                            | 100 | 100 | 100 | 98  |
| BMA2436 | glutamate/aspartate ABC transporter, permease protein                                            | 100 | 100 | 100 | 99  |
| BMA2437 | glutamate/aspartate ABC transporter, periplasmic glutamate/aspartate-binding protein, truncation | 100 | 99  | 100 | 99  |
| BMA2438 | ISBma1, transposase                                                                              | 100 | 98  | 100 | 98  |
| BMA2439 | glutamate dehydrogenase                                                                          | 100 | 100 | 100 | 98  |
| BMA2440 | transcriptional regulator, LysR family                                                           | 100 | 100 | 100 | 96  |
| BMA2441 | nitrate transporter, putative                                                                    | 100 | 99  | 100 | 96  |
| BMA2442 | adenylosuccinate lyase                                                                           | 100 | 99  | 100 | 96  |
| BMA2443 | thermo-resistant gluconokinase                                                                   | 100 | 100 | 100 | 97  |
| BMA2444 | gluconate permease, putative                                                                     | 100 | 100 | 100 | 97  |
| BMA2445 | 4-hydroxy-2-oxoglutarate aldolase/2-dehydro-3-deoxyphosphogluconate aldolase                     | 100 | 100 | 100 | 96  |
| BMA2446 | 6-phosphogluconate dehydratase                                                                   | 100 | 99  | 100 | 97  |
| BMA2447 | transcriptional regulator, RpiR family                                                           | 100 | 98  | 100 | 90  |
| BMA2449 | membrane protein, putative                                                                       | 100 | 99  | 100 | 97  |
| BMA2450 | gamma-glutamyl phosphate reductase                                                               | 100 | 99  | 100 | 96  |
| BMA2451 | DNA polymerase III, delta subunit                                                                | 100 | 100 | 100 | 97  |
| BMA2452 | lipoprotein, putative                                                                            | 100 | 99  | 100 | 92  |
| BMA2453 | leucyl-tRNA synthetase                                                                           | 100 | 99  | 100 | 97  |
| BMA2455 | MotA/TolQ/ExbB proton channel family protein                                                     | 100 | 100 | 100 | 95  |
| BMA2456 | dihydrodipicolinate reductase                                                                    | 100 | 99  | 100 | 97  |
| BMA2457 | outer membrane lipoprotein, putative                                                             | 100 | 99  | 100 | 91  |
| BMA2458 | ferric uptake regulator                                                                          | 100 | 100 | 100 | 99  |
| BMA2460 | allantoicase                                                                                     | 100 | 99  | 100 | 97  |
| BMA2461 | C4-dicarboxylate transport protein                                                               | 100 | 99  | 100 | 95  |
| BMA2462 | transcriptional regulator, GntR family                                                           | 100 | 100 | 100 | 97  |
| BMA2464 | transcriptional regulator, LysR family                                                           | 100 | 99  | 100 | 91  |
| BMA2465 | carbonic anhydrases                                                                              | 100 | 98  | 98  | 92  |
| BMA2466 | cyanate hydratase                                                                                | 100 | 99  | 100 | 93  |
| BMA2467 | transporter, putative                                                                            | 100 | 99  | 100 | 92  |
| BMA2468 | glyceraldehyde-3-phosphate dehydrogenase, type I                                                 | 100 | 99  | 100 | 99  |
| BMA2469 | transketolase                                                                                    | 100 | 99  | 100 | 96  |
| BMA2471 | glyoxalase family protein                                                                        | 100 | 99  | 100 | 95  |
| BMA2472 | conserved hypothetical protein TIGR00046                                                         | 100 | 98  | 100 | 92  |
| BMA2474 | barstar family protein                                                                           | 100 | 100 | 100 | 100 |
| BMA2476 | ribonuclease SA                                                                                  | 100 | 99  | 100 | 93  |
| BMA2477 | NADP-dependent malic enzyme                                                                      | 100 | 99  | 100 | 98  |
| BMA2478 | thiamine-monophosphate kinase                                                                    | 100 | 99  | 100 | 96  |

|         |                                                                            |     |     |     |     |
|---------|----------------------------------------------------------------------------|-----|-----|-----|-----|
| BMA2479 | phosphatidylglycerophosphatase A, putative                                 | 100 | 100 | 100 | 98  |
| BMA2480 | competence/damage-inducible protein CinA                                   | 100 | 100 | 100 | 97  |
| BMA2481 | orotidine 5'-monophosphate decarboxylase                                   | 100 | 100 | 100 | 94  |
| BMA2482 | conserved hypothetical protein                                             | 100 | 99  | 100 | 94  |
| BMA2483 | oxidoreductase, short chain dehydrogenase/reductase family                 | 100 | 100 | 100 | 92  |
| BMA2484 | L-arabinose ABC transporter, permease protein                              | 100 | 100 | 100 | 97  |
| BMA2485 | L-arabinose ABC transporter, ATP-binding protein                           | 100 | 99  | 100 | 96  |
| BMA2486 | L-arabinose ABC transporter, periplasmic L-arabinose-binding protein       | 100 | 99  | 100 | 97  |
| BMA2487 | oxidoreductase, short-chain dehydrogenase/reductase family                 | 100 | 99  | 100 | 92  |
| BMA2488 | KDPG/KHG aldolase, putative                                                | 100 | 100 | 100 | 92  |
| BMA2489 | 2-dehydro-3-deoxygalactonokinase                                           | 100 | 100 | 100 | 93  |
| BMA2490 | transcriptional regulator, IclR family                                     | 100 | 100 | 100 | 97  |
| BMA2491 | hypothetical protein                                                       | 100 | 100 | 100 | 91  |
| BMA2492 | serine-type carboxypeptidase family protein                                | 100 | 99  | 100 | 94  |
| BMA2493 | monofunctional biosynthetic peptidoglycan transglycosylase                 | 100 | 99  | 100 | 92  |
| BMA2494 | shikimate 5-dehydrogenase                                                  | 100 | 100 | 100 | 93  |
| BMA2495 | ribonuclease II (RNB) family protein                                       | 100 | 99  | 100 | 95  |
| BMA2496 | conserved hypothetical protein                                             | 100 | 99  | 100 | 97  |
| BMA2497 | UDP-N-acetylmuramate:L-alanyl-gamma-D-glutamyl-meso-diaminopimelate ligase | 100 | 99  | 99  | 96  |
| BMA2498 | conserved hypothetical protein                                             | 100 | 99  | 100 | 93  |
| BMA2499 | thioredoxin family protein, putative                                       | 100 | 98  | 100 | 87  |
| BMA2500 | 3-dehydroquininate dehydratase, type II                                    | 100 | 100 | 100 | 98  |
| BMA2501 | acetyl-CoA carboxylase, biotin carboxyl carrier protein                    | 100 | 99  | 100 | 94  |
| BMA2502 | acetyl-CoA carboxylase, biotin carboxylase                                 | 100 | 99  | 100 | 99  |
| BMA2503 | ribosomal protein L11 methyltransferase                                    | 100 | 99  | 100 | 97  |
| BMA2505 | thiol peroxidase                                                           | 100 | 100 | 100 | 95  |
| BMA2506 | ribokinase, putative                                                       | 100 | 99  | 100 | 97  |
| BMA2507 | outer membrane lipoprotein                                                 | 100 | 100 | 100 | 100 |
| BMA2509 | ribonucleoside-diphosphate reductase, beta subunit                         | 100 | 99  | 100 | 99  |
| BMA2510 | ribonucleoside-diphosphate reductase, alpha subunit                        | 100 | 100 | 100 | 98  |
| BMA2511 | ampD protein                                                               | 100 | 100 | 100 | 92  |
| BMA2512 | conserved hypothetical protein                                             | 100 | 100 | 100 | 94  |
| BMA2513 | cytochrome C assembly family protein                                       | 100 | 99  | 100 | 96  |
| BMA2514 | signal recognition particle protein                                        | 100 | 100 | 100 | 99  |
| BMA2515 | hypoxanthine-guanine phosphoribosyltransferase, putative                   | 100 | 100 | 100 | 97  |
| BMA2516 | membrane protein, MarC family                                              | 100 | 99  | 100 | 98  |
| BMA2517 | prolyl-tRNA synthetase                                                     | 100 | 99  | 100 | 98  |
| BMA2518 | pyrophosphatase, MutT/nudix family                                         | 100 | 100 | 100 | 95  |
| BMA2519 | lipoprotein, putative                                                      | 100 | 100 | 100 | 98  |
| BMA2520 | glutamate 5-kinase                                                         | 100 | 100 | 100 | 96  |
| BMA2521 | GTP-binding protein, GTP1/OBG family                                       | 100 | 100 | 100 | 97  |
| BMA2522 | ribosomal protein L27                                                      | 100 | 100 | 100 | 100 |
| BMA2523 | ribosomal protein L21                                                      | 100 | 100 | 100 | 100 |
| BMA2524 | octaprenyl-diphosphate synthase                                            | 100 | 99  | 100 | 97  |
| BMA2530 | CBS domain protein                                                         | 100 | 99  | 100 | 96  |
| BMA2531 | type III/IV secretion system protein                                       | 100 | 100 | 99  | 92  |
| BMA2532 | type IV pilus biogenesis protein PilC                                      | 100 | 99  | 100 | 88  |
| BMA2533 | type IV pilus prepilin peptidase PilD                                      | 100 | 100 | 100 | 96  |
| BMA2534 | dephospho-CoA kinase                                                       | 100 | 100 | 100 | 88  |

|           |                                                                                            |     |     |     |     |
|-----------|--------------------------------------------------------------------------------------------|-----|-----|-----|-----|
| BMA2535   | conserved hypothetical protein                                                             | 100 | 99  | 100 | 98  |
| BMA2536   | conserved hypothetical protein                                                             | 100 | 100 | 100 | 94  |
| BMA2537   | pyrophosphatase, NUDIX family                                                              | 100 | 99  | 100 | 91  |
| BMA2538   | conserved hypothetical protein                                                             | 100 | 100 | 100 | 100 |
| BMA2539   | glutamate N-acetyltransferase/amino-acid acetyltransferase                                 | 100 | 99  | 100 | 97  |
| BMA2540   | preprotein translocase, SecA subunit                                                       | 100 | 100 | 100 | 98  |
| BMA2542   | conserved hypothetical protein                                                             | 100 | 100 | 100 | 96  |
| BMA2543   | UDP-3-0-acyl N-acetylglucosamine deacetylase                                               | 100 | 99  | 100 | 98  |
| BMA2545   | cell division protein FtsZ                                                                 | 100 | 100 | 100 | 100 |
| BMA2547   | cell division protein FtsA                                                                 | 100 | 99  | 100 | 100 |
| BMA2548   | cell division protein FtsQ                                                                 | 100 | 99  | 100 | 98  |
| BMA2549   | D-alanine--D-alanine ligase B                                                              | 100 | 100 | 100 | 98  |
| BMA2550   | UDP-N-acetylmuramate--alanine ligase                                                       | 100 | 99  | 100 | 98  |
| BMA2551   | UDP-N-acetylglucosamine--N-acetylmuramyl-(pentapeptide) pyrophosphoryl-undecaprenol N-acet | 100 | 100 | 100 | 97  |
| BMA2552   | cell division protein FtsW                                                                 | 100 | 100 | 100 | 97  |
| BMA2553   | UDP-N-acetylmuramoylalanine--D-glutamate ligase                                            | 100 | 99  | 100 | 96  |
| BMA2554   | phospho-N-acetylmuramoyl-pentapeptide-transferase                                          | 100 | 100 | 100 | 100 |
| BMA2555   | UDP-N-acetylmuramoyl-tripeptide--D-alanyl-D-alanine ligase                                 | 100 | 100 | 100 | 93  |
| BMA2556   | UDP-N-acetylmuramoylalanyl-D-glutamate--2,6-diaminopimelate ligase                         | 100 | 99  | 100 | 95  |
| BMA2557   | penicillin-binding protein                                                                 | 100 | 99  | 100 | 97  |
| BMA2558   | cell division protein FtsL, putative                                                       | 100 | 98  | 100 | 98  |
| BMA2559   | S-adenosyl-methyltransferase MraW                                                          | 100 | 99  | 100 | 97  |
| BMA2560   | mraZ protein                                                                               | 100 | 99  | 100 | 99  |
| BMA2561   | conserved hypothetical protein                                                             | 100 | 99  | 100 | 95  |
| BMA2562   | outer membrane porin, putative                                                             | 100 | 100 | 100 | 98  |
| BMA2571   | lipase/acylhydrolase, putative                                                             | 100 | 98  | 100 | 88  |
| BMA2573   | phenylacetic acid degradation protein PaaA                                                 | 100 | 99  | 100 | 97  |
| BMA2574   | phenylacetic acid degradation protein PaaB                                                 | 100 | 100 | 100 | 98  |
| BMA2575   | phenylacetic acid degradation protein PaaC                                                 | 100 | 99  | 100 | 94  |
| BMA2577   | phenylacetic acid degradation NADH oxidoreductase PaaE                                     | 100 | 99  | 100 | 97  |
| BMA2578   | conserved hypothetical protein                                                             | 100 | 99  | 100 | 94  |
| BMA2579   | transcriptional regulator, TetR family                                                     | 100 | 99  | 100 | 98  |
| BMA2581   | leucine-responsive regulatory protein, putative                                            | 100 | 100 | 100 | 98  |
| BMA2582   | 4-hydroxyphenylpyruvate dioxygenase                                                        | 100 | 100 | 100 | 98  |
| BMA2582.1 | hypothetical protein                                                                       | 100 | 100 | 100 | 87  |
| BMA2584   | oxidoreductase, putative                                                                   | 100 | 99  | 100 | 95  |
| BMA2586   | NADP-dependent malic enzyme                                                                | 100 | 100 | 100 | 98  |
| BMA2587   | orotate phosphoribosyltransferase                                                          | 100 | 100 | 100 | 99  |
| BMA2588   | phosphatidylethanolamine-binding protein, putative                                         | 100 | 99  | 100 | 90  |
| BMA2589   | flavodoxin domain protein                                                                  | 100 | 100 | 99  | 97  |
| BMA2590   | N-acetyl-gamma-glutamyl-phosphate reductase                                                | 100 | 99  | 100 | 97  |
| BMA2591   | hypothetical protein                                                                       | 100 | 99  | 100 | 94  |
| BMA2593   | outer membrane protein, OmpW family                                                        | 100 | 100 | 100 | 97  |
| BMA2594   | ISBma1, transposase, truncation                                                            | 96  | 98  | 96  | 98  |
| BMA2597   | cytochrome c assembly family protein                                                       | 100 | 99  | 100 | 95  |
| BMA2598   | cytochrome c assembly family protein                                                       | 100 | 99  | 100 | 96  |
| BMA2599   | cytochrome c family protein                                                                | 100 | 100 | 100 | 96  |
| BMA2600   | conserved hypothetical protein                                                             | 100 | 100 | 100 | 98  |
| BMA2601   | porphobilinogen synthase                                                                   | 100 | 99  | 100 | 96  |

|         |                                                            |     |     |     |     |
|---------|------------------------------------------------------------|-----|-----|-----|-----|
| BMA2602 | thiol:disulfide interchange protein DsbD, putative         | 100 | 99  | 100 | 93  |
| BMA2603 | periplasmic divalent cation tolerance protein              | 100 | 100 | 100 | 96  |
| BMA2604 | ribosomal protein L17                                      | 100 | 100 | 100 | 100 |
| BMA2606 | dna-directed rna polymerase alpha chain                    | 100 | 100 | 100 | 99  |
| BMA2607 | ribosomal protein S4                                       | 100 | 99  | 100 | 97  |
| BMA2608 | ribosomal protein S11                                      | 100 | 100 | 100 | 100 |
| BMA2609 | ribosomal protein S13                                      | 100 | 100 | 100 | 99  |
| BMA2610 | ribosomal protein L36                                      | 100 | 100 | 100 | 100 |
| BMA2611 | translation initiation factor IF-1                         | 100 | 98  | 100 | 98  |
| BMA2612 | preprotein translocase, SecY subunit                       | 100 | 99  | 100 | 99  |
| BMA2613 | ribosomal protein L15                                      | 100 | 100 | 100 | 98  |
| BMA2614 | ribosomal protein L30                                      | 100 | 100 | 100 | 100 |
| BMA2615 | ribosomal protein S5                                       | 100 | 100 | 100 | 99  |
| BMA2616 | ribosomal protein L18                                      | 100 | 100 | 100 | 100 |
| BMA2617 | ribosomal protein L6                                       | 100 | 100 | 100 | 98  |
| BMA2618 | ribosomal protein S8                                       | 100 | 100 | 100 | 100 |
| BMA2619 | ribosomal protein S14                                      | 100 | 99  | 100 | 99  |
| BMA2620 | ribosomal protein L5                                       | 100 | 99  | 100 | 98  |
| BMA2621 | ribosomal protein L24                                      | 100 | 100 | 100 | 100 |
| BMA2622 | ribosomal protein L14                                      | 100 | 100 | 100 | 100 |
| BMA2623 | ribosomal protein S17                                      | 100 | 100 | 100 | 98  |
| BMA2624 | ribosomal protein L29                                      | 100 | 100 | 100 | 100 |
| BMA2625 | ribosomal protein L16                                      | 100 | 100 | 100 | 100 |
| BMA2626 | ribosomal protein S3                                       | 100 | 100 | 100 | 99  |
| BMA2627 | ribosomal protein L22                                      | 100 | 100 | 100 | 100 |
| BMA2628 | ribosomal protein S19                                      | 100 | 100 | 100 | 100 |
| BMA2629 | ribosomal protein L2                                       | 100 | 100 | 100 | 98  |
| BMA2630 | ribosomal protein L23                                      | 100 | 100 | 100 | 100 |
| BMA2631 | ribosomal protein L4                                       | 100 | 100 | 100 | 100 |
| BMA2632 | ribosomal protein L3                                       | 100 | 100 | 100 | 99  |
| BMA2633 | ribosomal protein S10                                      | 100 | 100 | 100 | 100 |
| BMA2634 | translation elongation factor Tu                           | 100 | 100 | 100 | 100 |
| BMA2635 | translation elongation factor G                            | 100 | 99  | 100 | 99  |
| BMA2636 | ribosomal protein S7                                       | 100 | 100 | 100 | 100 |
| BMA2637 | ribosomal protein S12                                      | 100 | 99  | 100 | 99  |
| BMA2638 | ATP-dependent DNA helicase RecQ                            | 100 | 100 | 100 | 98  |
| BMA2639 | ISBma1, transposase                                        | 100 | 99  | 100 | 98  |
| BMA2640 | DNA-directed RNA polymerase, beta subunit                  | 100 | 99  | 100 | 98  |
| BMA2641 | DNA-directed RNA polymerase, beta subunit                  | 100 | 100 | 100 | 99  |
| BMA2642 | ribosomal protein L7/L12                                   | 100 | 100 | 100 | 97  |
| BMA2643 | ribosomal protein L10                                      | 100 | 99  | 100 | 98  |
| BMA2644 | ribosomal protein L1                                       | 100 | 100 | 100 | 100 |
| BMA2645 | ribosomal protein L11                                      | 100 | 100 | 100 | 100 |
| BMA2646 | transcription antitermination protein NusG                 | 100 | 99  | 100 | 99  |
| BMA2647 | preprotein translocase, SecE subunit                       | 100 | 99  | 100 | 99  |
| BMA2649 | translation elongation factor Tu                           | 100 | 100 | 100 | 100 |
| BMA2658 | transcriptional regulator, PadR family                     | 100 | 99  | 100 | 95  |
| BMA2659 | GMC oxidoreductase                                         | 100 | 98  | 100 | 92  |
| BMA2660 | oxidoreductase, short-chain dehydrogenase/reductase family | 100 | 98  | 100 | 97  |

|         |                                                                                             |     |     |     |     |
|---------|---------------------------------------------------------------------------------------------|-----|-----|-----|-----|
| BMA2661 | conserved hypothetical protein                                                              | 100 | 100 | 100 | 89  |
| BMA2662 | conserved hypothetical protein                                                              | 100 | 98  | 100 | 93  |
| BMA2663 | phenylacetaldehyde dehydrogenase                                                            | 100 | 99  | 100 | 94  |
| BMA2665 | branched-chain amino acid ABC transporter, periplasmic amino acid-binding protein, putative | 100 | 100 | 100 | 96  |
| BMA2666 | branched-chain amino acid ABC transporter, permease protein, putative                       | 100 | 100 | 100 | 95  |
| BMA2667 | branched-chain amino acid ABC transporter, permease protein, putative                       | 100 | 100 | 100 | 96  |
| BMA2668 | branched-chain amino acid ABC transporter, ATP-binding protein                              | 100 | 99  | 100 | 97  |
| BMA2669 | branched-chain amino acid ABC transporter, ATP-binding protein, putative                    | 100 | 99  | 100 | 93  |
| BMA2670 | transcriptional regulator, AraC family                                                      | 100 | 100 | 99  | 96  |
| BMA2671 | outer membrane porin, putative                                                              | 100 | 99  | 100 | 97  |
| BMA2673 | type III restriction-modification system, res subunit                                       | 100 | 99  | 100 | 93  |
| BMA2674 | type III DNA modification methyltransferase                                                 | 100 | 99  | 100 | 95  |
| BMA2675 | outer membrane porin, putative                                                              | 100 | 99  | 100 | 98  |
| BMA2676 | DNA-binding response regulator                                                              | 100 | 100 | 100 | 98  |
| BMA2677 | sensor histidine kinase                                                                     | 100 | 99  | 100 | 94  |
| BMA2678 | ABC transporter, permease protein                                                           | 100 | 100 | 100 | 97  |
| BMA2679 | ABC transporter, ATP-binding protein                                                        | 100 | 100 | 100 | 98  |
| BMA2680 | conserved hypothetical protein                                                              | 100 | 99  | 100 | 96  |
| BMA2683 | transcriptional regulator, MerR family                                                      | 100 | 99  | 98  | 91  |
| BMA2684 | flagellar biosynthetic protein FliR                                                         | 100 | 99  | 100 | 96  |
| BMA2685 | flagellar biosynthetic protein FliQ                                                         | 100 | 100 | 100 | 97  |
| BMA2686 | flagellar biosynthetic protein FliP, interruption-C                                         | 100 | 98  | 100 | 97  |
| BMA2691 | phage portal protein, PBSX family                                                           | 100 | 98  | 100 | 98  |
| BMA2695 | stringent starvation protein A                                                              | 100 | 100 | 95  | 100 |
| BMA2696 | ubiquinol-cytochrome c reductase, cytochrome c1                                             | 100 | 99  | 100 | 96  |
| BMA2697 | ubiquinol-cytochrome c reductase, cytochrome b                                              | 100 | 100 | 100 | 99  |
| BMA2698 | ubiquinol-cytochrome c reductase, iron-sulfur subunit                                       | 100 | 100 | 100 | 95  |
| BMA2699 | conserved hypothetical protein TIGR00486                                                    | 100 | 100 | 100 | 97  |
| BMA2700 | serine protease                                                                             | 100 | 99  | 100 | 97  |
| BMA2701 | Sec-independent protein translocase TatC                                                    | 100 | 99  | 100 | 97  |
| BMA2702 | Sec-independent protein translocase protein TatB                                            | 100 | 98  | 99  | 90  |
| BMA2703 | twin-arginine translocation protein, TatA/E family                                          | 100 | 100 | 100 | 94  |
| BMA2704 | HIT family protein                                                                          | 100 | 100 | 100 | 96  |
| BMA2705 | membrane protein, putative                                                                  | 100 | 99  | 100 | 97  |
| BMA2706 | phosphoribosyl-ATP pyrophosphohydrolase                                                     | 100 | 100 | 100 | 97  |
| BMA2707 | phosphoribosyl-AMP cyclohydrolase                                                           | 100 | 100 | 100 | 96  |
| BMA2708 | imidazoleglycerol phosphate synthase, cyclase subunit                                       | 100 | 99  | 100 | 97  |
| BMA2709 | phosphoribosylformimino-5-aminoimidazole carboxamide ribotide isomerase                     | 100 | 100 | 100 | 99  |
| BMA2710 | imidazole glycerol phosphate synthase, glutamine amidotransferase subunit                   | 100 | 100 | 100 | 98  |
| BMA2711 | membrane protein, MarC family                                                               | 100 | 100 | 100 | 100 |
| BMA2712 | imidazoleglycerol-phosphate dehydratase                                                     | 100 | 100 | 100 | 98  |
| BMA2713 | histidinol-phosphate aminotransferase                                                       | 100 | 100 | 100 | 96  |
| BMA2714 | histidinol dehydrogenase                                                                    | 100 | 99  | 100 | 97  |
| BMA2715 | ATP phosphoribosyltransferase                                                               | 100 | 100 | 100 | 98  |
| BMA2716 | UDP-N-acetylglucosamine 1-carboxyvinyltransferase                                           | 100 | 99  | 100 | 96  |
| BMA2717 | BoIA/YrbA family protein                                                                    | 100 | 100 | 100 | 100 |
| BMA2718 | ABC transporter, permease protein                                                           | 100 | 100 | 100 | 98  |
| BMA2719 | ABC transporter, ATP-binding protein                                                        | 100 | 99  | 100 | 97  |
| BMA2721 | conserved hypothetical protein                                                              | 100 | 98  | 100 | 92  |

|         |                                                                                        |     |     |     |     |
|---------|----------------------------------------------------------------------------------------|-----|-----|-----|-----|
| BMA2722 | conserved hypothetical protein                                                         | 100 | 100 | 100 | 97  |
| BMA2723 | lipoprotein VacJ                                                                       | 100 | 99  | 100 | 92  |
| BMA2724 | ABC transporter, periplasmic substrate-binding protein                                 | 100 | 100 | 95  | 95  |
| BMA2725 | ABC transporter, permease protein                                                      | 100 | 100 | 100 | 100 |
| BMA2726 | ABC transporter, ATP-binding protein                                                   | 100 | 99  | 100 | 98  |
| BMA2727 | thiamin-phosphate pyrophosphorylase                                                    | 100 | 99  | 100 | 93  |
| BMA2728 | thiamin biosynthesis ThiG                                                              | 100 | 100 | 100 | 97  |
| BMA2729 | thiamine biosynthesis protein ThiS, putative                                           | 100 | 100 | 100 | 95  |
| BMA2730 | glycine oxidase ThiO                                                                   | 100 | 99  | 100 | 94  |
| BMA2731 | ABC transporter, ATP-binding protein                                                   | 100 | 100 | 100 | 97  |
| BMA2732 | conserved hypothetical protein                                                         | 100 | 100 | 99  | 88  |
| BMA2733 | amino acid carrier protein                                                             | 100 | 100 | 100 | 97  |
| BMA2735 | glutamate synthase, small subunit                                                      | 100 | 99  | 100 | 96  |
| BMA2736 | glutamate synthase, large subunit                                                      | 100 | 100 | 100 | 99  |
| BMA2737 | conserved hypothetical protein                                                         | 100 | 100 | 100 | 99  |
| BMA2738 | outer membrane protein, OmpW family                                                    | 100 | 100 | 100 | 95  |
| BMA2740 | glycerophosphoryl diester phosphodiesterase                                            | 100 | 100 | 100 | 92  |
| BMA2741 | glycerol-3-phosphate ABC transporter, ATP-binding protein                              | 100 | 99  | 100 | 96  |
| BMA2742 | glycerol-3-phosphate ABC transporter, permease protein                                 | 100 | 99  | 100 | 98  |
| BMA2743 | glycerol-3-phosphate ABC transporter, permease protein                                 | 100 | 99  | 100 | 97  |
| BMA2744 | glycerol-3-phosphate ABC transporter, periplasmic glycerol-3-phosphate-binding protein | 100 | 99  | 100 | 98  |
| BMA2745 | deoxyguanosinetriphosphate triphosphohydrolase, putative                               | 100 | 99  | 100 | 96  |
| BMA2746 | 3-dehydroquinase synthase                                                              | 100 | 100 | 100 | 96  |
| BMA2747 | shikimate kinase                                                                       | 100 | 99  | 100 | 98  |
| BMA2751 | hypothetical protein                                                                   | 100 | 98  | 100 | 87  |
| BMA2752 | penicillin-binding protein, 1A family                                                  | 100 | 100 | 100 | 97  |
| BMA2754 | conserved hypothetical protein                                                         | 100 | 100 | 100 | 98  |
| BMA2755 | lipoprotein, putative                                                                  | 100 | 98  | 100 | 95  |
| BMA2756 | diaminopimelate decarboxylase                                                          | 100 | 100 | 100 | 94  |
| BMA2757 | membrane protein, putative                                                             | 100 | 99  | 98  | 90  |
| BMA2758 | conserved hypothetical protein                                                         | 100 | 99  | 100 | 94  |
| BMA2761 | flagellar biosynthetic protein FliP, interruption-N                                    | 100 | 100 | 100 | 98  |
| BMA2762 | flagellar protein FliO                                                                 | 100 | 99  | 100 | 91  |
| BMA2763 | flagellar motor switch protein FliN                                                    | 100 | 100 | 100 | 98  |
| BMA2764 | flagellar motor switch protein FliM                                                    | 100 | 99  | 100 | 98  |
| BMA2765 | flagellar protein FliL                                                                 | 100 | 100 | 100 | 93  |
| BMA2767 | membrane protein, putative                                                             | 100 | 100 | 100 | 99  |
| BMA2768 | LrgA family protein                                                                    | 100 | 99  | 99  | 96  |
| BMA2769 | transcriptional regulator, LysR family                                                 | 100 | 100 | 100 | 96  |
| BMA2770 | drug resistance transporter, EmrB/QacA family                                          | 100 | 99  | 100 | 95  |
| BMA2771 | transcriptional regulator, MarR family                                                 | 100 | 99  | 100 | 92  |
| BMA2773 | RND efflux system, outer membrane lipoprotein, NodT family                             | 100 | 97  | 99  | 91  |
| BMA2774 | general secretory pathway protein N                                                    | 100 | 99  | 100 | 92  |
| BMA2775 | general secretion pathway protein M                                                    | 100 | 99  | 100 | 98  |
| BMA2776 | general secretory pathway protein L                                                    | 100 | 99  | 100 | 88  |
| BMA2777 | general secretory pathway protein K                                                    | 100 | 99  | 100 | 95  |
| BMA2778 | general secretory pathway protein J                                                    | 100 | 99  | 100 | 94  |
| BMA2779 | general secretory pathway protein I                                                    | 100 | 99  | 100 | 93  |
| BMA2780 | general secretion pathway protein H                                                    | 100 | 98  | 100 | 88  |



|         |                                                                |     |     |     |     |
|---------|----------------------------------------------------------------|-----|-----|-----|-----|
| BMA2781 | general secretion pathway protein G                            | 100 | 100 | 100 | 100 |
| BMA2783 | general secretion pathway protein C                            | 100 | 100 | 100 | 96  |
| BMA2784 | general secretion pathway protein F                            | 100 | 100 | 100 | 99  |
| BMA2785 | general secretion pathway protein E                            | 100 | 99  | 100 | 98  |
| BMA2786 | general secretion pathway protein D                            | 100 | 99  | 100 | 91  |
| BMA2787 | ipgF protein, putative                                         | 100 | 100 | 100 | 91  |
| BMA2789 | cobalamin synthesis protein/P47K family protein                | 100 | 99  | 100 | 92  |
| BMA2791 | cold-shock domain family protein                               | 100 | 100 | 100 | 100 |
| BMA2796 | amino acid permease                                            | 100 | 99  | 100 | 96  |
| BMA2799 | transporter, putative                                          | 100 | 99  | 100 | 95  |
| BMA2800 | phosphoheptose isomerase                                       | 100 | 98  | 100 | 94  |
| BMA2801 | conserved hypothetical protein TIGR00252                       | 100 | 98  | 99  | 87  |
| BMA2802 | tetrapyrrole methylase family protein                          | 100 | 99  | 100 | 93  |
| BMA2804 | chaperone protein, putative                                    | 100 | 100 | 100 | 96  |
| BMA2805 | nitroreductase family protein                                  | 100 | 100 | 100 | 97  |
| BMA2806 | transporter, putative                                          | 100 | 99  | 100 | 98  |
| BMA2807 | transcriptional regulator, TetR family                         | 100 | 97  | 99  | 91  |
| BMA2809 | conserved hypothetical protein                                 | 100 | 99  | 96  | 86  |
| BMA2810 | conserved domain protein                                       | 100 | 99  | 100 | 91  |
| BMA2811 | conserved hypothetical protein                                 | 100 | 99  | 100 | 94  |
| BMA2815 | conserved hypothetical protein                                 | 98  | 99  | 97  | 89  |
| BMA2818 | peptidase, M1 family                                           | 100 | 100 | 100 | 96  |
| BMA2821 | toxin secretion ABC transporter, ATP-binding protein, putative | 100 | 99  | 100 | 96  |
| BMA2822 | type I secretion outer membrane protein, TolC family           | 100 | 99  | 100 | 98  |
| BMA2824 | conserved hypothetical protein                                 | 100 | 99  | 100 | 98  |
| BMA2826 | conserved hypothetical protein                                 | 100 | 99  | 100 | 97  |
| BMA2827 | conserved hypothetical protein                                 | 100 | 100 | 100 | 98  |
| BMA2828 | OmpA domain protein                                            | 100 | 98  | 100 | 90  |
| BMA2829 | conserved hypothetical protein                                 | 100 | 99  | 100 | 94  |
| BMA2830 | CipA/B type protease                                           | 100 | 98  | 100 | 94  |
| BMA2831 | conserved hypothetical protein                                 | 100 | 100 | 100 | 96  |
| BMA2832 | conserved hypothetical protein                                 | 100 | 99  | 100 | 96  |
| BMA2833 | conserved hypothetical protein                                 | 100 | 100 | 100 | 98  |
| BMA2836 | oxidoreductase, 2-nitropropane dioxygenase family              | 100 | 99  | 100 | 92  |
| BMA2838 | carboxymethylenebutenolidase                                   | 100 | 100 | 100 | 96  |
| BMA2839 | 6-aminohexanoate-cyclic-dimer hydrolase                        | 100 | 99  | 100 | 93  |
| BMA2840 | 5,10-methylenetetrahydrofolate reductase                       | 100 | 100 | 100 | 99  |
| BMA2841 | membrane protein, putative                                     | 100 | 100 | 100 | 99  |
| BMA2842 | adenosylhomocysteinase                                         | 100 | 100 | 100 | 99  |
| BMA2843 | RNA polymerase sigma factor for flagellar operon FlIA          | 100 | 100 | 100 | 98  |
| BMA2844 | flagellar biosynthesis protein FlhG, putative                  | 100 | 99  | 100 | 95  |
| BMA2845 | flagellar biosynthetic protein FlhF, putative                  | 100 | 99  | 100 | 98  |
| BMA2846 | flagellar biosynthesis protein FlhA                            | 100 | 100 | 100 | 99  |
| BMA2847 | flagellar biosynthetic protein FlhB                            | 100 | 100 | 100 | 96  |
| BMA2848 | conserved hypothetical protein                                 | 100 | 99  | 99  | 95  |
| BMA2850 | conserved hypothetical protein                                 | 100 | 99  | 100 | 93  |
| BMA2851 | chemotaxis protein CheZ                                        | 100 | 99  | 100 | 98  |
| BMA2852 | chemotaxis protein CheY                                        | 100 | 100 | 100 | 100 |
| BMA2854 | protein-glutamate methyltransferase CheB                       | 100 | 99  | 100 | 98  |

|         |                                                                              |     |     |     |     |
|---------|------------------------------------------------------------------------------|-----|-----|-----|-----|
| BMA2855 | chemotaxis protein CheD                                                      | 100 | 99  | 100 | 95  |
| BMA2857 | methyl-accepting chemotaxis protein, putative                                | 100 | 99  | 100 | 89  |
| BMA2858 | chemotaxis protein CheW                                                      | 100 | 99  | 100 | 98  |
| BMA2860 | chemotaxis response regulator                                                | 100 | 100 | 100 | 92  |
| BMA2862 | chemotaxis MotA protein                                                      | 100 | 99  | 100 | 98  |
| BMA2863 | flagellar transcriptional activator FlhC                                     | 100 | 100 | 100 | 98  |
| BMA2864 | flagellar transcriptional activator FlhD                                     | 100 | 100 | 100 | 98  |
| BMA2866 | glycosyl transferase, group 1 family protein                                 | 100 | 98  | 100 | 97  |
| BMA2867 | H-NS histone family protein                                                  | 100 | 100 | 100 | 95  |
| BMA2868 | aquaporin Z                                                                  | 100 | 99  | 100 | 98  |
| BMA2869 | Cof-like hydrolase                                                           | 100 | 99  | 100 | 92  |
| BMA2870 | conserved hypothetical protein                                               | 100 | 100 | 100 | 93  |
| BMA2871 | DNA-3-methyladenine glycosidase I                                            | 100 | 99  | 100 | 91  |
| BMA2872 | ribosomal protein S21                                                        | 100 | 100 | 100 | 100 |
| BMA2873 | flagellin                                                                    | 100 | 100 | 100 | 90  |
| BMA2874 | flagellar hook-associated protein 2                                          | 100 | 99  | 100 | 94  |
| BMA2875 | hypothetical protein                                                         | 100 | 99  | 99  | 93  |
| BMA2886 | LysE family protein                                                          | 100 | 99  | 100 | 95  |
| BMA2888 | acid phosphatase AcpA                                                        | 100 | 99  | 100 | 96  |
| BMA2889 | lipoprotein, putative                                                        | 100 | 100 | 100 | 95  |
| BMA2890 | lipoprotein, putative                                                        | 100 | 100 | 100 | 93  |
| BMA2891 | curli production assembly/transport component CsgG, putative                 | 100 | 99  | 100 | 98  |
| BMA2893 | hydrolase, alpha/beta fold family                                            | 100 | 100 | 99  | 92  |
| BMA2894 | methyl-accepting chemotaxis protein, putative                                | 100 | 99  | 99  | 97  |
| BMA2895 | oxidoreductase, FAD-binding, putative                                        | 100 | 98  | 100 | 88  |
| BMA2896 | chitin binding protein, putative                                             | 100 | 100 | 100 | 95  |
| BMA2901 | amino acid ABC transporter, periplasmic amino acid-binding protein, putative | 100 | 99  | 100 | 98  |
| BMA2902 | amino acid ABC transporter, permease protein, putative                       | 100 | 99  | 100 | 93  |
| BMA2903 | conserved hypothetical protein                                               | 100 | 99  | 100 | 91  |
| BMA2905 | H-NS histone family protein                                                  | 100 | 100 | 100 | 100 |
| BMA2906 | cation efflux family protein                                                 | 100 | 99  | 99  | 96  |
| BMA2907 | transcriptional regulator, AsnC family                                       | 100 | 99  | 100 | 99  |
| BMA2908 | conserved hypothetical protein                                               | 100 | 100 | 100 | 95  |
| BMA2909 | metallo-beta-lactamase family protein                                        | 100 | 99  | 100 | 95  |
| BMA2911 | rare lipoprotein A family protein                                            | 100 | 100 | 100 | 96  |
| BMA2913 | DNA-binding protein HU, form B                                               | 100 | 100 | 100 | 100 |
| BMA2914 | oxidoreductase, FAD-binding family protein                                   | 100 | 99  | 100 | 91  |
| BMA2916 | sodium/hydrogen exchanger family protein                                     | 100 | 100 | 100 | 96  |
| BMA2917 | conserved hypothetical protein                                               | 100 | 100 | 100 | 99  |
| BMA2918 | transcriptional regulator, MarR family                                       | 100 | 98  | 100 | 96  |
| BMA2919 | glutamine amidotransferase class-I domain protein, putative                  | 100 | 100 | 100 | 94  |
| BMA2921 | SET domain protein                                                           | 100 | 100 | 100 | 97  |
| BMA2923 | sensor histidine kinase                                                      | 100 | 99  | 100 | 95  |
| BMA2924 | DNA-binding response regulator                                               | 100 | 100 | 100 | 100 |
| BMA2926 | pterin-4-alpha-carbinolamine dehydratase, putative                           | 100 | 100 | 100 | 98  |
| BMA2927 | phenylalanine-4-hydroxylase                                                  | 100 | 99  | 95  | 89  |
| BMA2928 | transcriptional regulator, AsnC family                                       | 100 | 100 | 99  | 96  |
| BMA2929 | adenylate cyclase, putative                                                  | 100 | 100 | 100 | 97  |
| BMA2930 | transcriptional regulator, LysR family                                       | 100 | 99  | 100 | 97  |

|         |                                                                                                |     |     |     |     |
|---------|------------------------------------------------------------------------------------------------|-----|-----|-----|-----|
| BMA2931 | methylmalonate-semialdehyde dehydrogenase                                                      | 100 | 100 | 100 | 97  |
| BMA2933 | oxidoreductase, GMC family protein                                                             | 100 | 99  | 100 | 95  |
| BMA2934 | branched-chain amino acid ABC transporter, ATP-binding protein                                 | 100 | 100 | 100 | 98  |
| BMA2935 | branched-chain amino acid ABC transporter, ATP-binding protein                                 | 100 | 99  | 100 | 96  |
| BMA2936 | branched-chain amino acid ABC transporter, periplasmic branched-chain amino acid-binding prote | 100 | 99  | 100 | 97  |
| BMA2937 | branched-chain amino acid ABC transporter, permease protein                                    | 100 | 99  | 100 | 97  |
| BMA2938 | branched-chain amino acid ABC transporter, permease protein                                    | 100 | 100 | 100 | 97  |
| BMA2940 | branched-chain amino acid ABC transporter, periplasmic amino acid-binding protein              | 100 | 100 | 100 | 96  |
| BMA2941 | branched-chain amino acid ABC transporter, permease protein                                    | 100 | 100 | 100 | 97  |
| BMA2942 | branched-chain amino acid ABC transporter, permease/ATP-binding protein                        | 100 | 99  | 100 | 94  |
| BMA2943 | branched-chain amino acid ABC transporter, ATP-binding protein                                 | 100 | 100 | 100 | 93  |
| BMA2944 | glucose-inhibited division protein A                                                           | 100 | 99  | 100 | 96  |
| BMA2945 | methyltransferase GidB                                                                         | 100 | 99  | 100 | 95  |
| BMA2946 | sporulation initiation inhibitor protein Soj                                                   | 100 | 100 | 100 | 99  |
| BMA2947 | stage 0 sporulation protein J, putative                                                        | 100 | 100 | 100 | 98  |
| BMA2948 | transporter, putative                                                                          | 100 | 99  | 99  | 93  |
| BMA2950 | ATP synthase protein I, putative                                                               | 100 | 99  | 100 | 97  |
| BMA2951 | ATP synthase F0, A subunit                                                                     | 100 | 99  | 100 | 97  |
| BMA2952 | ATP synthase F0, C subunit                                                                     | 100 | 100 | 100 | 100 |
| BMA2953 | ATP synthase F0, B subunit                                                                     | 100 | 99  | 100 | 99  |
| BMA2954 | ATP synthase F1, delta subunit                                                                 | 100 | 99  | 100 | 98  |
| BMA2955 | ATP synthase F1, alpha subunit                                                                 | 100 | 99  | 100 | 99  |
| BMA2956 | ATP synthase F1, gamma subunit                                                                 | 100 | 100 | 100 | 98  |
| BMA2957 | ATP synthase F1, beta subunit                                                                  | 100 | 100 | 100 | 100 |
| BMA2958 | ATP synthase F1, epsilon subunit                                                               | 100 | 100 | 100 | 97  |
| BMA2959 | AMP-binding enzyme domain protein                                                              | 100 | 99  | 100 | 94  |
| BMA2961 | cyclohexadienyl dehydratase                                                                    | 100 | 99  | 100 | 92  |
| BMA2962 | uroporphyrinogen decarboxylase                                                                 | 100 | 99  | 99  | 98  |
| BMA2963 | primosomal protein n <sup>1</sup>                                                              | 100 | 99  | 100 | 95  |
| BMA2965 | proline dehydrogenase/delta-1-pyrroline-5-carboxylate dehydrogenase                            | 100 | 99  | 100 | 98  |
| BMA2966 | amino acid ABC transporter, periplasmic amino acid-binding protein, putative                   | 100 | 99  | 100 | 97  |
| BMA2967 | feruloyl-CoA synthetase                                                                        | 100 | 100 | 100 | 93  |
| BMA2968 | acyl-CoA dehydrogenase domain protein                                                          | 100 | 100 | 100 | 95  |
| BMA2971 | aromatic aminotransferase, putative                                                            | 100 | 100 | 100 | 93  |
| BMA2972 | lysine-arginine-ornithine-binding periplasmic protein                                          | 100 | 99  | 100 | 90  |
| BMA2974 | transcriptional regulator, PadR family                                                         | 100 | 100 | 98  | 92  |
| BMA2975 | transcriptional regulator, merR family                                                         | 100 | 100 | 100 | 97  |
| BMA2976 | cadmium-translocating P-type ATPase                                                            | 100 | 99  | 100 | 93  |
| BMA2978 | membrane protein, putative                                                                     | 100 | 99  | 100 | 97  |
| BMA2981 | ethanolamine permease, putative                                                                | 100 | 99  | 100 | 98  |
| BMA2983 | ethanolamine ammonia-lyase heavy chain                                                         | 100 | 99  | 100 | 96  |
| BMA2984 | ethanolamine ammonia-lyase light chain                                                         | 100 | 99  | 98  | 95  |
| BMA2986 | aldehyde dehydrogenase family protein                                                          | 100 | 100 | 100 | 98  |
| BMA2987 | transcriptional regulator, araC family                                                         | 100 | 100 | 100 | 97  |
| BMA2988 | hypothetical protein                                                                           | 100 | 99  | 100 | 89  |
| BMA2989 | acetolactate synthase, large subunit, putative                                                 | 100 | 99  | 100 | 96  |
| BMA2991 | L-serine ammonia-lyase                                                                         | 100 | 99  | 100 | 96  |
| BMA2992 | hypothetical protein                                                                           | 100 | 100 | 100 | 97  |
| BMA2993 | glycine dehydrogenase                                                                          | 100 | 100 | 100 | 96  |

|           |                                                                  |     |     |     |    |
|-----------|------------------------------------------------------------------|-----|-----|-----|----|
| BMA2994   | glycine cleavage system H protein                                | 100 | 98  | 100 | 99 |
| BMA2994.1 | glycine cleavage system T protein                                | 100 | 100 | 100 | 95 |
| BMA2997   | lipoprotein, putative                                            | 100 | 100 | 100 | 98 |
| BMA2998   | oxidoreductase, Gfo/Idh/MocA family                              | 100 | 99  | 100 | 92 |
| BMA3002   | ATP-dependent DNA helicase Rep                                   | 100 | 99  | 100 | 98 |
| BMA3003   | cytochrome c family protein                                      | 100 | 99  | 100 | 96 |
| BMA3010   | alpha,alpha-trehalose-phosphate synthase                         | 100 | 100 | 100 | 98 |
| BMA3011   | conserved hypothetical protein                                   | 100 | 99  | 99  | 88 |
| BMA3013   | drug resistance transporter, EmrB/QacA subfamily, putative       | 100 | 99  | 100 | 92 |
| BMA3014   | conserved hypothetical protein TIGR00481                         | 100 | 100 | 98  | 94 |
| BMA3016   | hypothetical protein                                             | 100 | 99  | 100 | 90 |
| BMA3020   | ecotin                                                           | 100 | 98  | 100 | 93 |
| BMA3021   | D-alanyl-D-alanine carboxypeptidase family protein               | 100 | 99  | 100 | 87 |
| BMA3021.1 | hypothetical protein                                             | 100 | 100 | 100 | 90 |
| BMA3029   | conserved hypothetical protein                                   | 100 | 99  | 100 | 89 |
| BMA3030   | conserved hypothetical protein                                   | 100 | 99  | 100 | 86 |
| BMA3031   | acyl transferase domain protein                                  | 100 | 98  | 100 | 89 |
| BMA3034   | malonate decarboxylase, gamma subunit                            | 100 | 99  | 100 | 93 |
| BMA3035   | malonate decarboxylase, beta subunit                             | 100 | 100 | 100 | 93 |
| BMA3036   | malonate decarboxylase, delta subunit                            | 100 | 99  | 100 | 95 |
| BMA3037   | malonate decarboxylase alpha-subunit                             | 100 | 99  | 100 | 96 |
| BMA3038   | malonate transporter, M subunit                                  | 100 | 99  | 100 | 96 |
| BMA3039   | malonate transporter, L subunit                                  | 100 | 98  | 100 | 91 |
| BMA3040   | transcriptional regulator, LysR family                           | 100 | 100 | 100 | 96 |
| BMA3041   | 3-hydroxyacyl-CoA dehydrogenase family protein                   | 100 | 100 | 100 | 93 |
| BMA3042   | phosphoenolpyruvate carboxykinase                                | 100 | 100 | 100 | 96 |
| BMA3047   | heat shock protein, Hsp20 family                                 | 100 | 100 | 100 | 93 |
| BMA3048   | heat shock protein, Hsp20 family                                 | 100 | 98  | 99  | 90 |
| BMA3055   | oxidoreductase, short-chain dehydrogenase/reductase family       | 100 | 99  | 100 | 91 |
| BMA3056   | transcriptional regulator, LysR family, authentic point mutation | 100 | 99  | 100 | 94 |
| BMA3062   | transcriptional regulator, putative                              | 100 | 99  | 100 | 88 |
| BMA3063   | membrane protein, putative                                       | 100 | 99  | 100 | 89 |
| BMA3064   | conserved hypothetical protein                                   | 100 | 100 | 100 | 93 |
| BMA3066   | GGDEF domain protein                                             | 100 | 99  | 100 | 95 |
| BMA3070   | transcriptional regulator, LacI family                           | 100 | 99  | 100 | 95 |
| BMA3071   | ABC transporter, periplasmic substrate-binding protein           | 100 | 99  | 100 | 93 |
| BMA3072   | ABC transporter, permease protein                                | 100 | 100 | 100 | 97 |
| BMA3072.1 | hypothetical protein                                             | 100 | 100 | 100 | 97 |
| BMA3075   | ABC transporter, permease protein                                | 100 | 98  | 100 | 96 |
| BMA3076   | ABC transporter, ATP-binding protein                             | 100 | 100 | 100 | 95 |
| BMA3082   | major facilitator family transporter                             | 100 | 100 | 100 | 92 |
| BMA3083   | membrane protein, putative                                       | 100 | 100 | 100 | 96 |
| BMA3085   | oxidoreductase, molybdopterin-binding                            | 100 | 99  | 100 | 91 |
| BMA3090   | thiamine biosynthesis protein ThiC                               | 100 | 99  | 100 | 97 |
| BMA3094   | major facilitator family transporter                             | 100 | 100 | 100 | 98 |
| BMA3095   | excinuclease ABC, A subunit                                      | 100 | 99  | 100 | 98 |
| BMA3096   | membrane protein, putative                                       | 100 | 99  | 100 | 97 |
| BMA3097   | formyltetrahydrofolate deformylase                               | 100 | 99  | 100 | 95 |
| BMA3098   | thiamin pyrophosphokinase-related protein                        | 100 | 99  | 99  | 95 |

|           |                                                                                             |     |     |     |     |
|-----------|---------------------------------------------------------------------------------------------|-----|-----|-----|-----|
| BMA3099   | LysE family protein                                                                         | 100 | 95  | 100 | 94  |
| BMA3101   | potassium efflux system protein                                                             | 100 | 99  | 100 | 97  |
| BMA3102   | carbohydrate isomerase, KpsF/GutQ family                                                    | 100 | 100 | 100 | 97  |
| BMA3103   | phosphatase, YrbI family                                                                    | 100 | 100 | 100 | 94  |
| BMA3104   | conserved hypothetical protein                                                              | 100 | 99  | 100 | 98  |
| BMA3105   | conserved hypothetical protein                                                              | 100 | 99  | 100 | 96  |
| BMA3107   | ABC transporter, ATP-binding protein                                                        | 100 | 99  | 100 | 97  |
| BMA3108   | RNA polymerase sigma-54 factor                                                              | 100 | 100 | 100 | 98  |
| BMA3109   | ribosomal subunit interface protein                                                         | 100 | 100 | 100 | 97  |
| BMA3110   | PTS system, nitrogen regulatory IIA protein                                                 | 100 | 100 | 100 | 99  |
| BMA3111   | HPr(Ser) kinase/phosphatase, putative                                                       | 100 | 100 | 100 | 100 |
| BMA3112   | conserved hypothetical protein                                                              | 100 | 99  | 100 | 96  |
| BMA3113   | ATP-dependent protease La domain protein                                                    | 100 | 100 | 100 | 96  |
| BMA3114   | A/G-specific adenine glycosylase                                                            | 100 | 99  | 100 | 93  |
| BMA3115   | formamidopyrimidine-DNA glycosylase                                                         | 100 | 98  | 100 | 96  |
| BMA3116   | TPR domain protein                                                                          | 100 | 100 | 100 | 96  |
| BMA3118   | 4-diphosphocytidyl-2C-methyl-D-erythritol kinase                                            | 100 | 99  | 99  | 92  |
| BMA3120   | ribose-phosphate pyrophosphokinase                                                          | 100 | 100 | 100 | 99  |
| BMA3121   | ribosomal protein L25                                                                       | 100 | 100 | 100 | 96  |
| BMA3122   | peptidyl-tRNA hydrolase                                                                     | 100 | 99  | 100 | 94  |
| BMA3123   | histidinol-phosphate aminotransferase                                                       | 100 | 99  | 100 | 94  |
| BMA3124   | ferredoxin                                                                                  | 100 | 100 | 100 | 97  |
| BMA3125   | pantetheine-phosphate adenyllyltransferase                                                  | 100 | 100 | 100 | 100 |
| BMA3126   | methyltransferase, putative                                                                 | 100 | 99  | 100 | 95  |
| BMA3127   | signal recognition particle-docking protein FtsY                                            | 100 | 99  | 100 | 96  |
| BMA3128   | maleylacetoacetate isomerase                                                                | 100 | 99  | 100 | 95  |
| BMA3130   | nitrite reductase [NAD(P)H], large subunit                                                  | 100 | 99  | 100 | 96  |
| BMA3131   | nitrite reductase [NAD(P)H], small subunit                                                  | 100 | 97  | 100 | 94  |
| BMA3132   | molybdopterin oxidoreductase family protein                                                 | 100 | 99  | 100 | 95  |
| BMA3133   | glycosyl transferase family protein                                                         | 100 | 99  | 100 | 90  |
| BMA3135   | 2-isopropylmalate synthase                                                                  | 100 | 100 | 100 | 96  |
| BMA3135.1 | hypothetical protein                                                                        | 100 | 100 | 100 | 97  |
| BMA3136   | conserved hypothetical protein                                                              | 100 | 99  | 100 | 95  |
| BMA3138   | RNA polymerase sigma-32 factor                                                              | 100 | 99  | 100 | 97  |
| BMA3140   | ABC transporter, periplasmic substrate-binding protein, putative                            | 100 | 99  | 100 | 97  |
| BMA3141   | ABC transporter, permease protein                                                           | 100 | 100 | 100 | 97  |
| BMA3142   | ABC transporter, ATP-binding protein                                                        | 100 | 100 | 100 | 98  |
| BMA3143   | conserved hypothetical protein                                                              | 100 | 99  | 100 | 95  |
| BMA3144   | conserved hypothetical protein                                                              | 100 | 99  | 100 | 93  |
| BMA3145   | DNA polymerase III, alpha subunit, form 2                                                   | 100 | 99  | 100 | 95  |
| BMA3168   | transcriptional regulator, GntR family                                                      | 100 | 99  | 100 | 97  |
| BMA3168.1 | N-acetylglucosamine-6-phosphate deacetylase                                                 | 100 | 100 | 100 | 97  |
| BMA3170   | SIS domain protein                                                                          | 100 | 100 | 100 | 95  |
| BMA3171   | PTS system, glucose-specific EIIA/HPr/phosphoenolpyruvate-protein phosphotransferase compon | 100 | 99  | 100 | 92  |
| BMA3172   | PTS system, N-acetylglucosamine-specific IIABC component                                    | 100 | 99  | 100 | 96  |
| BMA3173   | beta-N-acetylhexosaminidase, putative                                                       | 100 | 99  | 100 | 95  |
| BMA3176   | cyd operon protein YbgT                                                                     | 100 | 100 | 100 | 96  |
| BMA3177   | cytochrome d ubiquinol oxidase, subunit II                                                  | 100 | 99  | 100 | 96  |
| BMA3178   | cytochrome d ubiquinol oxidase, subunit I                                                   | 100 | 100 | 100 | 97  |

|         |                                                                        |     |     |     |     |
|---------|------------------------------------------------------------------------|-----|-----|-----|-----|
| BMA3179 | hypothetical protein                                                   | 100 | 100 | 100 | 93  |
| BMA3181 | ISBma1, transposase                                                    | 100 | 98  | 100 | 98  |
| BMA3183 | D-methionine ABC transporter, periplasmic D-methionine-binding protein | 100 | 100 | 100 | 97  |
| BMA3184 | methyl-accepting chemotaxis protein                                    | 100 | 99  | 100 | 97  |
| BMA3186 | conserved hypothetical protein                                         | 100 | 100 | 99  | 98  |
| BMA3187 | SCO1/SenC family protein                                               | 100 | 100 | 100 | 97  |
| BMA3188 | protoheme IX farnesyltransferase                                       | 100 | 99  | 100 | 99  |
| BMA3189 | cytochrome c assembly family protein                                   | 100 | 99  | 100 | 98  |
| BMA3190 | conserved hypothetical protein                                         | 100 | 99  | 100 | 92  |
| BMA3191 | conserved hypothetical protein                                         | 100 | 100 | 100 | 96  |
| BMA3192 | conserved hypothetical protein                                         | 100 | 100 | 100 | 100 |
| BMA3193 | cytochrome c oxidase, subunit III                                      | 100 | 100 | 100 | 98  |
| BMA3194 | conserved hypothetical protein                                         | 100 | 98  | 100 | 95  |
| BMA3195 | cytochrome c oxidase assembly protein ctaG, putative                   | 100 | 100 | 100 | 94  |
| BMA3196 | cytochrome c oxidase, subunit I                                        | 100 | 100 | 100 | 99  |
| BMA3197 | cytochrome c oxidase, subunit II                                       | 100 | 100 | 100 | 96  |
| BMA3198 | conserved hypothetical protein                                         | 100 | 100 | 100 | 98  |
| BMA3199 | conserved hypothetical protein                                         | 100 | 99  | 100 | 95  |
| BMA3200 | ComF family protein                                                    | 100 | 98  | 100 | 92  |
| BMA3201 | RNA methyltransferase, TrmH family, group 2                            | 100 | 99  | 100 | 96  |
| BMA3203 | conserved hypothetical protein                                         | 100 | 100 | 99  | 91  |
| BMA3204 | glycerol-3-phosphate dehydrogenase (NAD(P)+)                           | 100 | 100 | 100 | 96  |
| BMA3205 | protein-export protein SecB                                            | 100 | 100 | 100 | 96  |
| BMA3206 | glutaredoxin 3                                                         | 100 | 98  | 100 | 97  |
| BMA3207 | rhodanese-like domain protein                                          | 100 | 98  | 100 | 97  |
| BMA3208 | phosphoglycerate mutase                                                | 100 | 100 | 100 | 95  |
| BMA3209 | carboxy-terminal protease                                              | 100 | 99  | 100 | 97  |
| BMA3210 | HesA/MoeB/ThiF family protein                                          | 100 | 100 | 100 | 95  |
| BMA3211 | phosphoenolpyruvate-protein phosphotransferase                         | 100 | 99  | 100 | 97  |
| BMA3212 | phosphocarrier protein HPr                                             | 100 | 100 | 100 | 96  |
| BMA3213 | PTS system, fructose-specific IIA component                            | 100 | 100 | 100 | 98  |
| BMA3214 | glutathione synthetase                                                 | 100 | 100 | 100 | 97  |
| BMA3215 | conserved hypothetical protein                                         | 100 | 99  | 100 | 98  |
| BMA3217 | ammonium transporter                                                   | 100 | 97  | 99  | 95  |
| BMA3218 | regulatory protein, P-II family                                        | 100 | 100 | 100 | 100 |
| BMA3219 | conserved hypothetical protein                                         | 100 | 100 | 100 | 97  |
| BMA3220 | Mg chelatase, subunit D/I family protein                               | 100 | 99  | 100 | 95  |
| BMA3223 | thioesterase domain protein                                            | 100 | 99  | 100 | 91  |
| BMA3225 | conserved hypothetical protein                                         | 100 | 100 | 100 | 97  |
| BMA3226 | C4-dicarboxylate transport transcriptional regulatory protein          | 100 | 100 | 100 | 97  |
| BMA3228 | C4-dicarboxylate transport protein                                     | 100 | 99  | 100 | 97  |
| BMA3229 | sodium:solute symporter family protein                                 | 100 | 99  | 100 | 96  |
| BMA3230 | conserved hypothetical protein                                         | 100 | 100 | 100 | 95  |
| BMA3231 | CAIB/BAIF family protein                                               | 100 | 99  | 100 | 96  |
| BMA3232 | acyl-CoA dehydrogenase domain protein                                  | 100 | 99  | 100 | 91  |
| BMA3233 | acyl-CoA dehydrogenase domain protein                                  | 100 | 99  | 100 | 95  |
| BMA3234 | fatty oxidation complex, alpha subunit, putative                       | 100 | 99  | 100 | 95  |
| BMA3235 | transcriptional regulator, LysR family                                 | 100 | 99  | 98  | 98  |
| BMA3237 | gamma-glutamyltransferase                                              | 100 | 99  | 100 | 91  |

|           |                                                          |     |     |     |     |
|-----------|----------------------------------------------------------|-----|-----|-----|-----|
| BMA3238   | conserved domain protein                                 | 100 | 98  | 100 | 88  |
| BMA3240   | alcohol dehydrogenase, zinc-containing                   | 100 | 99  | 100 | 94  |
| BMA3241   | ISBma1, transposase                                      | 100 | 99  | 100 | 99  |
| BMA3242   | transcriptional regulator, AraC family                   | 100 | 99  | 100 | 95  |
| BMA3243   | conserved hypothetical protein                           | 100 | 98  | 100 | 93  |
| BMA3244   | AmpG-related permease                                    | 100 | 99  | 100 | 98  |
| BMA3245   | methionine biosynthesis protein MetW                     | 100 | 99  | 100 | 98  |
| BMA3246   | homoserine O-acetyltransferase                           | 100 | 100 | 100 | 99  |
| BMA3247   | transcriptional regulator, TetR family                   | 100 | 99  | 100 | 91  |
| BMA3248   | HAD-superfamily hydrolase                                | 100 | 99  | 100 | 95  |
| BMA3249   | acetylglutamate kinase                                   | 100 | 100 | 100 | 99  |
| BMA3251   | sensor histidine kinase                                  | 100 | 100 | 100 | 99  |
| BMA3252   | response regulator                                       | 100 | 100 | 100 | 99  |
| BMA3253   | heat shock protein HslVU, ATPase subunit HslU            | 100 | 99  | 100 | 98  |
| BMA3254   | protease HslVU, subunit HslV                             | 100 | 100 | 100 | 97  |
| BMA3255   | DnaK suppressor protein                                  | 100 | 100 | 100 | 100 |
| BMA3256   | cobalamin synthesis protein/P47K family protein          | 100 | 100 | 100 | 97  |
| BMA3257   | conserved hypothetical protein                           | 100 | 99  | 100 | 94  |
| BMA3258   | integrase/recombinase XerC                               | 100 | 99  | 98  | 94  |
| BMA3259   | conserved hypothetical protein                           | 100 | 99  | 98  | 95  |
| BMA3260   | diaminopimelate epimerase                                | 100 | 99  | 100 | 95  |
| BMA3261   | lipid A biosynthesis lauroyl acyltransferase, putative   | 100 | 99  | 100 | 96  |
| BMA3262   | S-adenosylmethionine synthetase                          | 100 | 99  | 100 | 99  |
| BMA3263   | hypothetical protein                                     | 100 | 100 | 100 | 96  |
| BMA3264   | conserved hypothetical protein                           | 100 | 99  | 100 | 90  |
| BMA3266   | oxidoreductase, aldo/keto reductase family               | 100 | 100 | 100 | 96  |
| BMA3267   | hypothetical protein                                     | 100 | 100 | 100 | 100 |
| BMA3268   | membrane protein, putative                               | 100 | 99  | 100 | 90  |
| BMA3269   | major facilitator family transporter                     | 100 | 99  | 96  | 92  |
| BMA3269.1 | hypothetical protein                                     | 100 | 100 | 100 | 100 |
| BMA3271   | conserved hypothetical protein                           | 100 | 99  | 100 | 95  |
| BMA3273   | coniferyl aldehyde dehydrogenase                         | 100 | 100 | 100 | 96  |
| BMA3275   | oxidoreductase, GMC family                               | 100 | 99  | 100 | 95  |
| BMA3277   | flagellar FliJ protein                                   | 100 | 100 | 100 | 96  |
| BMA3278   | flagellum-specific ATP synthase FliI                     | 100 | 100 | 100 | 93  |
| BMA3279   | flagellar assembly protein FliH                          | 100 | 99  | 100 | 96  |
| BMA3280   | flagellar motor switch protein FliG                      | 100 | 100 | 100 | 97  |
| BMA3281   | flagellar M-ring protein FliF                            | 100 | 99  | 100 | 97  |
| BMA3282   | flagellar hook-basal body complex protein FliE, putative | 100 | 99  | 100 | 96  |
| BMA3283   | flagellar protein FliS                                   | 100 | 100 | 100 | 93  |
| BMA3284   | conserved hypothetical protein                           | 100 | 100 | 100 | 95  |
| BMA3286   | flagellar biosynthetic protein FliB domain protein       | 100 | 98  | 100 | 93  |
| BMA3287   | conserved hypothetical protein                           | 100 | 100 | 100 | 93  |
| BMA3288   | lipoprotein, putative                                    | 100 | 98  | 100 | 94  |
| BMA3289   | amino acid permease                                      | 100 | 99  | 100 | 98  |
| BMA3292   | ferredoxin--NADP reductase                               | 100 | 100 | 100 | 98  |
| BMA3294   | conserved hypothetical protein                           | 100 | 100 | 99  | 95  |
| BMA3296   | ATP-dependent protease domain protein                    | 100 | 100 | 100 | 97  |
| BMA3297   | oxidoreductase, FAD-binding family protein               | 100 | 99  | 100 | 94  |

|           |                                                                  |     |     |     |    |
|-----------|------------------------------------------------------------------|-----|-----|-----|----|
| BMA3298   | high potential iron-sulfur protein, putative                     | 100 | 100 | 100 | 96 |
| BMA3299   | major facilitator family transporter                             | 100 | 99  | 100 | 95 |
| BMA3301   | dipeptide ABC transporter, periplasmic dipeptide-binding protein | 100 | 99  | 100 | 97 |
| BMA3302   | dipeptide ABC transporter, permease protein                      | 100 | 99  | 100 | 97 |
| BMA3304   | peptide ABC transporter, ATP-binding protein                     | 100 | 99  | 100 | 96 |
| BMA3305   | dipeptide ABC transporter, ATP-binding protein                   | 100 | 99  | 100 | 96 |
| BMA3306   | GumN family protein                                              | 100 | 99  | 100 | 97 |
| BMA3307   | membrane protein, putative                                       | 100 | 100 | 100 | 95 |
| BMA3308   | membrane protein, putative                                       | 100 | 100 | 100 | 93 |
| BMA3309   | LamB/YcsF family protein                                         | 100 | 99  | 100 | 96 |
| BMA3310   | allophanate hydrolase, subunit 2                                 | 96  | 100 | 98  | 91 |
| BMA3311   | conserved hypothetical protein TIGR00370                         | 100 | 100 | 100 | 97 |
| BMA3312   | conserved hypothetical protein                                   | 100 | 100 | 100 | 98 |
| BMA3313   | 5-formyltetrahydrofolate cyclo-ligase family protein             | 100 | 98  | 100 | 93 |
| BMA3314   | lytic murein transglycosylase, putative                          | 100 | 99  | 100 | 96 |
| BMA3315   | NADH-ubiquinone oxidoreductase, putative                         | 100 | 100 | 100 | 91 |
| BMA3316   | glutathione S-transferase, N-terminal domain protein             | 100 | 100 | 100 | 95 |
| BMA3317   | tRNA nucleotidyltransferase                                      | 100 | 99  | 100 | 95 |
| BMA3321   | flagella synthesis protein FlgN, putative                        | 99  | 100 | 100 | 94 |
| BMA3322   | negative regulator of flagellin synthesis FlgM, putative         | 100 | 99  | 99  | 93 |
| BMA3323   | flagella basal body P-ring formation protein FlgA                | 100 | 98  | 100 | 89 |
| BMA3325   | flagellar basal-body rod protein FlgB                            | 100 | 99  | 100 | 95 |
| BMA3326   | flagellar basal-body rod protein FlgC                            | 100 | 100 | 100 | 97 |
| BMA3327   | basal-body rod modification protein FlgD                         | 100 | 97  | 100 | 91 |
| BMA3328   | flagellar hook protein FlgE                                      | 100 | 100 | 100 | 86 |
| BMA3329   | flagellar basal-body rod protein FlgF                            | 100 | 100 | 100 | 99 |
| BMA3330   | flagellar basal-body rod protein FlgG                            | 100 | 99  | 100 | 98 |
| BMA3331   | flagellar L-ring protein FlgH                                    | 100 | 100 | 100 | 98 |
| BMA3332   | flagellar P-ring protein                                         | 100 | 99  | 100 | 97 |
| BMA3333   | flagellar protein FlgJ                                           | 100 | 100 | 100 | 94 |
| BMA3334   | conserved hypothetical protein                                   | 100 | 100 | 100 | 95 |
| BMA3335   | flagellar hook-associated protein 1                              | 100 | 100 | 100 | 93 |
| BMA3336   | flagellar hook-associated protein 3                              | 100 | 100 | 100 | 95 |
| BMA3337   | xanthine/uracil permease family protein                          | 100 | 100 | 100 | 96 |
| BMA3340   | chromate transporter, putative, authentic frameshift             | 100 | 96  | 100 | 89 |
| BMA3341   | hypothetical protein                                             | 100 | 100 | 100 | 93 |
| BMA3342   | alkylphosphonate utilization operon protein PhnA, putative       | 100 | 100 | 100 | 99 |
| BMA3343   | membrane protein, putative                                       | 100 | 98  | 100 | 93 |
| BMA3345   | outer membrane porin, putative                                   | 100 | 99  | 100 | 96 |
| BMA3346   | hypothetical protein                                             | 100 | 99  | 100 | 92 |
| BMA3347   | lipoprotein, putative                                            | 100 | 99  | 100 | 88 |
| BMA3348.1 | hypothetical protein                                             | 100 | 99  | 100 | 90 |
| BMA3350   | glycosyl transferase, group 2 family protein                     | 98  | 99  | 98  | 93 |
| BMA3354   | carbohydrate porin, OprB family                                  | 100 | 100 | 100 | 89 |
| BMA3356.1 | hypothetical protein                                             | 100 | 100 | 98  | 88 |
| BMA3358   | manganese/iron transporter, NRAMP family                         | 100 | 98  | 100 | 88 |
| BMA3359.1 | hypothetical protein                                             | 100 | 98  | 100 | 94 |
| BMA3362   | glutathione-disulfide reductase                                  | 100 | 100 | 100 | 94 |
| BMA3363   | argininosuccinate synthase                                       | 100 | 100 | 100 | 97 |



|          |                                                                 |     |     |     |     |
|----------|-----------------------------------------------------------------|-----|-----|-----|-----|
| BMA3365  | conserved hypothetical protein                                  | 100 | 100 | 100 | 86  |
| BMA3368  | copper-translocating P-type ATPase                              | 100 | 99  | 100 | 90  |
| BMA3370  | LemA family protein                                             | 100 | 99  | 100 | 90  |
| BMA3371  | lipoprotein, putative                                           | 100 | 99  | 100 | 89  |
| BMA3372  | conserved hypothetical protein                                  | 100 | 98  | 100 | 86  |
| BMA3379  | glucosamine--fructose-6-phosphate aminotransferase, isomerizing | 100 | 100 | 100 | 96  |
| BMA3380  | UDP-N-acetylglucosamine pyrophosphorylase                       | 100 | 99  | 100 | 96  |
| BMA3381  | conserved hypothetical protein                                  | 100 | 100 | 100 | 98  |
| BMA3382  | dihydroneopterin aldolase                                       | 100 | 100 | 100 | 99  |
| BMA3384  | conserved hypothetical protein                                  | 100 | 99  | 100 | 92  |
| BMA3385  | membrane protein, putative                                      | 100 | 100 | 100 | 95  |
| BMA3386  | fructokinase, putative                                          | 100 | 100 | 100 | 95  |
| BMA3387  | conserved hypothetical protein                                  | 100 | 97  | 100 | 88  |
| BMA3388  | transcriptional regulator, LacI family                          | 100 | 100 | 100 | 98  |
| BMA3389  | methyl-accepting chemotaxis protein, putative                   | 100 | 100 | 100 | 95  |
| BMA3390  | sodium/bile acid symporter family protein                       | 100 | 100 | 100 | 94  |
| BMA3395  | tRNA modification GTPase TrmE                                   | 100 | 100 | 100 | 95  |
| BMA3396  | hypothetical protein                                            | 100 | 99  | 100 | 98  |
| BMA3397  | inner membrane protein, 60 kDa                                  | 100 | 99  | 100 | 97  |
| BMA3398  | conserved hypothetical protein                                  | 100 | 99  | 100 | 96  |
| BMA3399  | ribonuclease P protein component                                | 100 | 98  | 100 | 97  |
| BMA3400  | ribosomal protein L34                                           | 100 | 100 | 100 | 100 |
| BMAA0001 | hypothetical protein                                            | 100 | 100 | 100 | 91  |
| BMAA0002 | phage integrase family protein                                  | 100 | 99  | 100 | 95  |
| BMAA0003 | hypothetical protein                                            | 96  | 99  | 100 | 88  |
| BMAA0004 | DNA-binding protein                                             | 100 | 100 | 100 | 96  |
| BMAA0005 | 2-amino-3-ketobutyrate coenzyme A ligase                        | 100 | 99  | 100 | 96  |
| BMAA0006 | threonine 3-dehydrogenase                                       | 100 | 100 | 100 | 99  |
| BMAA0007 | YceI like familyprotein                                         | 100 | 99  | 100 | 91  |
| BMAA0008 | transcriptional regulator, TetR family                          | 100 | 100 | 100 | 90  |
| BMAA0009 | conserved hypothetical protein                                  | 100 | 100 | 100 | 96  |
| BMAA0010 | succinylglutamate desuccinylase / aspartoacylase family protein | 100 | 99  | 100 | 88  |
| BMAA0011 | tartrate dehydrogenase                                          | 100 | 99  | 100 | 95  |
| BMAA0012 | transcriptional regulator, LysR family                          | 100 | 99  | 100 | 95  |
| BMAA0013 | membrane protein, putative                                      | 100 | 99  | 100 | 87  |
| BMAA0014 | glutathione S-transferase                                       | 100 | 100 | 100 | 90  |
| BMAA0015 | hypothetical protein                                            | 100 | 100 | 100 | 94  |
| BMAA0016 | patatin-like phospholipase                                      | 100 | 99  | 100 | 98  |
| BMAA0017 | D-beta-hydroxybutyrate dehydrogenase                            | 100 | 100 | 100 | 97  |
| BMAA0018 | acetoacetate decarboxylase                                      | 100 | 100 | 100 | 99  |
| BMAA0019 | PAP2 family protein                                             | 100 | 99  | 100 | 92  |
| BMAA0021 | siderophore-interacting protein                                 | 100 | 99  | 100 | 92  |
| BMAA0022 | transcriptional regulator, PadR family                          | 100 | 99  | 100 | 92  |
| BMAA0024 | hypothetical protein                                            | 99  | 100 | 99  | 98  |
| BMAA0025 | conserved hypothetical protein                                  | 100 | 100 | 100 | 91  |
| BMAA0027 | radical SAM domain/B12 binding domain protein                   | 100 | 99  | 100 | 88  |
| BMAA0029 | LysE family protein                                             | 100 | 99  | 100 | 97  |
| BMAA0030 | transcriptional regulator, LysR family                          | 100 | 99  | 100 | 95  |
| BMAA0031 | transcriptional regulator, Crp/Fnr family                       | 100 | 99  | 100 | 98  |

|          |                                                                                                |     |     |     |     |
|----------|------------------------------------------------------------------------------------------------|-----|-----|-----|-----|
| BMAA0032 | universal stress protein family                                                                | 100 | 100 | 100 | 98  |
| BMAA0035 | aldehyde dehydrogenase (NADP) family protein                                                   | 100 | 99  | 100 | 92  |
| BMAA0039 | conserved hypothetical protein                                                                 | 100 | 100 | 100 | 86  |
| BMAA0040 | hypothetical protein                                                                           | 100 | 100 | 100 | 97  |
| BMAA0041 | serine O-acetyltransferase, putative                                                           | 100 | 99  | 100 | 93  |
| BMAA0042 | oxidoreductase, short chain dehydrogenase/reductase family                                     | 100 | 100 | 100 | 97  |
| BMAA0043 | GTP cyclohydrolase I                                                                           | 100 | 99  | 100 | 90  |
| BMAA0044 | transcriptional regulator, LysR family                                                         | 100 | 100 | 100 | 95  |
| BMAA0045 | 4-hydroxybenzoate hydroxylase                                                                  | 100 | 99  | 100 | 92  |
| BMAA0046 | 3-oxoadipate CoA-transferase, alpha subunit                                                    | 100 | 100 | 100 | 97  |
| BMAA0047 | 3-oxoadipate CoA-succinyl transferase beta subunit                                             | 100 | 100 | 100 | 94  |
| BMAA0048 | 3-carboxy-cis,cis-muconate cycloisomerase                                                      | 100 | 99  | 100 | 93  |
| BMAA0049 | 3-oxoadipate enol-lactone hydrolase/4-carboxymuconolactone decarboxylase, authentic point mut: | 100 | 99  | 100 | 92  |
| BMAA0050 | 4-hydroxybenzoate transporter                                                                  | 100 | 99  | 100 | 94  |
| BMAA0051 | hypothetical protein                                                                           | 100 | 100 | 100 | 97  |
| BMAA0052 | LysE family protein                                                                            | 100 | 100 | 100 | 94  |
| BMAA0055 | chromate transport protein, authentic point mutation                                           | 100 | 98  | 100 | 93  |
| BMAA0056 | chromate resistance protein ChrB                                                               | 100 | 99  | 100 | 92  |
| BMAA0062 | excinuclease ABC, subunit A, form 2                                                            | 100 | 99  | 100 | 94  |
| BMAA0076 | conserved domain protein                                                                       | 100 | 100 | 99  | 88  |
| BMAA0079 | phospholipase C                                                                                | 100 | 99  | 100 | 95  |
| BMAA0085 | exopolysaccharide tyrosine-protein kinase, putative                                            | 100 | 99  | 100 | 93  |
| BMAA0086 | conserved domain protein                                                                       | 100 | 100 | 100 | 88  |
| BMAA0087 | membrane protein, putative                                                                     | 100 | 100 | 100 | 92  |
| BMAA0089 | membrane protein, putative                                                                     | 100 | 100 | 100 | 95  |
| BMAA0093 | serine protease, subtilase family                                                              | 100 | 99  | 100 | 95  |
| BMAA0096 | hypothetical protein                                                                           | 100 | 100 | 100 | 94  |
| BMAA0097 | GGDEF domain protein                                                                           | 100 | 99  | 100 | 88  |
| BMAA0099 | hydrolase, alpha/beta fold family                                                              | 100 | 100 | 100 | 96  |
| BMAA0100 | conserved hypothetical protein                                                                 | 100 | 99  | 100 | 94  |
| BMAA0101 | oxidoreductase, short chain dehydrogenase/reductase family                                     | 100 | 99  | 100 | 95  |
| BMAA0102 | transcriptional regulator, TetR family                                                         | 100 | 99  | 100 | 89  |
| BMAA0104 | transcriptional regulator, LysR family                                                         | 100 | 100 | 100 | 95  |
| BMAA0107 | glutathione S-transferase                                                                      | 100 | 99  | 100 | 92  |
| BMAA0109 | nucleoside transporter                                                                         | 100 | 99  | 100 | 97  |
| BMAA0110 | deoxyribose-phosphate aldolase                                                                 | 100 | 99  | 100 | 94  |
| BMAA0114 | thymidine phosphorylase                                                                        | 100 | 100 | 100 | 91  |
| BMAA0115 | cytidine deaminase                                                                             | 100 | 100 | 100 | 95  |
| BMAA0116 | osmotically inducible protein Y domain protein                                                 | 100 | 99  | 100 | 93  |
| BMAA0117 | 6-phosphofructokinase                                                                          | 100 | 99  | 100 | 89  |
| BMAA0120 | acetate kinase                                                                                 | 100 | 99  | 100 | 92  |
| BMAA0121 | phosphate acetyl/butyryltransferase family protein                                             | 100 | 99  | 100 | 94  |
| BMAA0122 | poly-beta-hydroxybutyrate polymerase                                                           | 100 | 99  | 100 | 90  |
| BMAA0123 | ATP synthase F1, beta subunit                                                                  | 100 | 98  | 100 | 90  |
| BMAA0124 | ATP synthase F1, epsilon subunit                                                               | 100 | 100 | 100 | 95  |
| BMAA0126 | hypothetical protein                                                                           | 100 | 100 | 100 | 91  |
| BMAA0127 | ATP synthase F0, A subunit                                                                     | 100 | 100 | 100 | 95  |
| BMAA0128 | ATP synthase F0, C subunit                                                                     | 100 | 100 | 100 | 100 |
| BMAA0129 | ATP synthase F0, B subunit                                                                     | 100 | 100 | 100 | 92  |

|          |                                                            |     |     |     |    |
|----------|------------------------------------------------------------|-----|-----|-----|----|
| BMAA0131 | ATP synthase F1, gamma subunit, putative                   | 100 | 99  | 100 | 92 |
| BMAA0132 | alcohol dehydrogenase, zinc-containing                     | 100 | 99  | 100 | 95 |
| BMAA0134 | conserved hypothetical protein                             | 100 | 98  | 100 | 92 |
| BMAA0138 | ABC transporter, permease                                  | 100 | 98  | 100 | 96 |
| BMAA0141 | RND efflux system, outer membrane protein                  | 100 | 100 | 100 | 92 |
| BMAA0144 | universal stress protein family                            | 100 | 100 | 100 | 98 |
| BMAA0145 | hypothetical protein                                       | 100 | 97  | 100 | 86 |
| BMAA0146 | ABC transporter, permease protein                          | 100 | 99  | 100 | 95 |
| BMAA0147 | ABC transporter, ATP-binding protein                       | 100 | 99  | 100 | 95 |
| BMAA0148 | membrane protein                                           | 100 | 99  | 100 | 87 |
| BMAA0150 | polysaccharide deacetylase domain protein                  | 100 | 99  | 100 | 86 |
| BMAA0152 | methyl-accepting chemotaxis protein                        | 100 | 99  | 99  | 91 |
| BMAA0154 | sulfotransferase domain protein                            | 100 | 97  | 100 | 89 |
| BMAA0155 | osmotically inducible protein Y domain protein             | 100 | 100 | 100 | 95 |
| BMAA0157 | hypothetical protein                                       | 100 | 100 | 99  | 90 |
| BMAA0158 | decarboxylase family protein                               | 100 | 97  | 100 | 90 |
| BMAA0160 | hypothetical protein                                       | 100 | 99  | 100 | 88 |
| BMAA0163 | alcohol dehydrogenase, zinc-containing                     | 100 | 100 | 100 | 96 |
| BMAA0164 | transcriptional regulator, Crp/Fnr family                  | 100 | 100 | 100 | 97 |
| BMAA0166 | acetoacetyl-CoA reductase                                  | 100 | 99  | 100 | 96 |
| BMAA0168 | metallo-beta-lactamase family protein                      | 100 | 99  | 100 | 93 |
| BMAA0169 | conserved hypothetical protein                             | 100 | 99  | 100 | 96 |
| BMAA0172 | lysine-specific permease                                   | 100 | 100 | 100 | 98 |
| BMAA0176 | ISBma1, transposase, interruption-N                        | 100 | 99  | 100 | 98 |
| BMAA0180 | isochorismatase family protein                             | 100 | 98  | 100 | 93 |
| BMAA0181 | transcriptional regulator, MarR family                     | 100 | 100 | 100 | 87 |
| BMAA0183 | carboxylesterase family protein                            | 100 | 98  | 99  | 88 |
| BMAA0184 | oxidoreductase, short chain dehydrogenase/reductase family | 100 | 99  | 100 | 93 |
| BMAA0185 | benzoate 1,2-dioxygenase, ferredoxin reductase component   | 100 | 99  | 100 | 95 |
| BMAA0186 | benzoate 1,2-dioxygenase beta subunit                      | 100 | 100 | 100 | 93 |
| BMAA0187 | benzoate 1,2-dioxygenase, alpha subunit                    | 100 | 99  | 100 | 95 |
| BMAA0188 | transcriptional regulator CatR                             | 100 | 99  | 100 | 96 |
| BMAA0191 | transcriptional regulator, AraC family                     | 100 | 100 | 100 | 94 |
| BMAA0192 | 2,4-dienoyl-CoA reductase                                  | 100 | 99  | 100 | 97 |
| BMAA0194 | ubiquinol oxidase, subunit II                              | 100 | 98  | 99  | 90 |
| BMAA0195 | ubiquinol oxidase, subunit I                               | 100 | 99  | 100 | 96 |
| BMAA0196 | ubiquinol oxidase, subunit III                             | 100 | 99  | 95  | 87 |
| BMAA0197 | ubiquinol oxidase, subunit IV                              | 100 | 100 | 100 | 99 |
| BMAA0198 | muconolactone delta-isomerase                              | 100 | 100 | 100 | 95 |
| BMAA0199 | catechol 1,2-dioxygenase                                   | 100 | 99  | 100 | 94 |
| BMAA0200 | muconate cycloisomerase                                    | 100 | 99  | 100 | 96 |
| BMAA0201 | transcriptional regulator CatR                             | 100 | 99  | 100 | 95 |
| BMAA0202 | transcriptional regulator, AraC family                     | 100 | 100 | 100 | 94 |
| BMAA0203 | ortho-halobenzoate 1,2-dioxygenase alpha-ISP protein OhbB  | 100 | 99  | 100 | 95 |
| BMAA0204 | ortho-halobenzoate 1,2-dioxygenase beta-ISP protein OhbA   | 100 | 100 | 99  | 94 |
| BMAA0205 | iron-sulfur cluster-binding protein, rieske family         | 100 | 100 | 99  | 91 |
| BMAA0206 | ferredoxin reductase                                       | 100 | 98  | 100 | 88 |
| BMAA0207 | HIT family protein                                         | 100 | 100 | 100 | 97 |
| BMAA0208 | phospholipase D, putative                                  | 100 | 99  | 100 | 90 |

|          |                                                                                             |     |     |     |     |
|----------|---------------------------------------------------------------------------------------------|-----|-----|-----|-----|
| BMAA0211 | Na <sup>+</sup> /H <sup>+</sup> antiporter                                                  | 100 | 100 | 100 | 96  |
| BMAA0212 | acetolactate synthase, putative                                                             | 100 | 99  | 100 | 98  |
| BMAA0213 | aldehyde dehydrogenase                                                                      | 100 | 99  | 100 | 95  |
| BMAA0216 | sensor histidine kinase/response regulator                                                  | 100 | 99  | 100 | 97  |
| BMAA0217 | methyl-accepting chemotaxis protein, putative                                               | 100 | 100 | 100 | 95  |
| BMAA0218 | cheW domain protein                                                                         | 100 | 100 | 100 | 92  |
| BMAA0220 | chemotaxis protein cheW                                                                     | 100 | 99  | 100 | 90  |
| BMAA0223 | haloacid dehalogenase, type II                                                              | 100 | 99  | 100 | 94  |
| BMAA0225 | voltage-gated chloride channel                                                              | 100 | 99  | 100 | 93  |
| BMAA0226 | CAAX amino terminal protease family protein                                                 | 100 | 99  | 99  | 87  |
| BMAA0228 | conserved hypothetical protein                                                              | 100 | 98  | 100 | 89  |
| BMAA0230 | tryptophanyl-tRNA synthetase                                                                | 100 | 99  | 100 | 95  |
| BMAA0231 | transcriptional regulator, AraC family                                                      | 100 | 99  | 100 | 88  |
| BMAA0232 | DJ-1/PfpI family protein                                                                    | 100 | 99  | 100 | 94  |
| BMAA0233 | ABC transporter, permease protein/ATP-binding protein                                       | 100 | 99  | 100 | 93  |
| BMAA0239 | conserved domain protein                                                                    | 100 | 99  | 100 | 87  |
| BMAA0240 | conserved hypothetical protein                                                              | 100 | 100 | 100 | 96  |
| BMAA0241 | transcriptional regulator, LysR family                                                      | 100 | 99  | 100 | 93  |
| BMAA0242 | acyl-CoA dehydrogenase domain protein                                                       | 100 | 99  | 100 | 96  |
| BMAA0243 | phosphotransferase enzyme family protein                                                    | 100 | 99  | 100 | 94  |
| BMAA0244 | phosphoglycerate mutase family protein                                                      | 100 | 99  | 100 | 96  |
| BMAA0245 | 7-alpha-hydroxysteroid dehydrogenase                                                        | 100 | 99  | 100 | 95  |
| BMAA0246 | 2,5-dichloro-2,5-cyclohexadiene-1,4-diol dehydrogenase                                      | 100 | 100 | 99  | 94  |
| BMAA0247 | oxidoreductase, zinc-binding dehydrogenase family protein                                   | 100 | 99  | 100 | 97  |
| BMAA0250 | major facilitator family transporter                                                        | 100 | 100 | 100 | 92  |
| BMAA0251 | TonB-dependent receptor                                                                     | 100 | 99  | 100 | 93  |
| BMAA0252 | hypothetical protein                                                                        | 100 | 100 | 98  | 94  |
| BMAA0253 | membrane protein, putative                                                                  | 100 | 100 | 100 | 98  |
| BMAA0256 | conserved hypothetical protein                                                              | 100 | 100 | 100 | 94  |
| BMAA0259 | extracellular nuclease, putative                                                            | 100 | 100 | 100 | 93  |
| BMAA0260 | conserved hypothetical protein                                                              | 100 | 99  | 100 | 96  |
| BMAA0261 | conserved hypothetical protein                                                              | 100 | 98  | 100 | 91  |
| BMAA0263 | RNA polymerase sigma-70 factor, ECF subfamily                                               | 100 | 99  | 100 | 97  |
| BMAA0266 | N-acetylmuramoyl-L-alanine amidase domain protein                                           | 100 | 99  | 100 | 92  |
| BMAA0268 | rubrerythrin                                                                                | 100 | 100 | 100 | 100 |
| BMAA0269 | conserved hypothetical protein                                                              | 100 | 99  | 100 | 93  |
| BMAA0270 | conserved hypothetical protein                                                              | 100 | 99  | 100 | 90  |
| BMAA0271 | conserved domain protein                                                                    | 100 | 99  | 100 | 93  |
| BMAA0272 | mannose-1-phosphate guanylyltransferase/mannose-6-phosphate isomerase, authentic point mutã | 100 | 98  | 100 | 93  |
| BMAA0274 | membrane protein, putative                                                                  | 100 | 99  | 99  | 94  |
| BMAA0277 | hypothetical protein                                                                        | 98  | 99  | 98  | 87  |
| BMAA0279 | transcriptional regulator, AraC family                                                      | 100 | 98  | 100 | 90  |
| BMAA0280 | membrane protein, putative                                                                  | 100 | 100 | 100 | 93  |
| BMAA0283 | FMN-dependent dehydrogenase                                                                 | 100 | 100 | 100 | 88  |
| BMAA0284 | ebsC protein, putative                                                                      | 100 | 100 | 99  | 98  |
| BMAA0286 | alpha amylase family protein                                                                | 100 | 100 | 100 | 91  |
| BMAA0287 | thiamine-phosphate pyrophosphorylase ThiE, putative                                         | 100 | 99  | 100 | 89  |
| BMAA0288 | CBS domain protein                                                                          | 100 | 99  | 100 | 95  |
| BMAA0289 | sensor histidine kinase                                                                     | 100 | 98  | 99  | 86  |

|          |                                                                        |     |     |     |     |
|----------|------------------------------------------------------------------------|-----|-----|-----|-----|
| BMAA0290 | membrane protein, putative                                             | 100 | 100 | 100 | 94  |
| BMAA0291 | transcriptional regulator, LysR family                                 | 100 | 99  | 100 | 95  |
| BMAA0292 | tautomerase enzyme family protein                                      | 100 | 100 | 100 | 94  |
| BMAA0294 | transcriptional regulator ModE                                         | 100 | 98  | 100 | 94  |
| BMAA0297 | molybdenum ABC transporter, ATP-binding protein                        | 100 | 99  | 100 | 95  |
| BMAA0298 | molybdenum ABC transporter, permease protein                           | 100 | 99  | 100 | 95  |
| BMAA0299 | molybdenum ABC transporter, periplasmic molybdate-binding protein      | 100 | 99  | 100 | 96  |
| BMAA0300 | PAP2 family protein                                                    | 100 | 99  | 100 | 91  |
| BMAA0301 | polyhydroxybutyrate depolymerase domain protein                        | 100 | 100 | 100 | 90  |
| BMAA0302 | hypothetical protein                                                   | 100 | 100 | 100 | 100 |
| BMAA0303 | organic hydroperoxide resistance protein                               | 100 | 99  | 100 | 95  |
| BMAA0304 | transcriptional regulator, MarR family                                 | 100 | 99  | 100 | 96  |
| BMAA0306 | membrane protein, putative                                             | 100 | 99  | 100 | 95  |
| BMAA0307 | homoserine kinase                                                      | 100 | 99  | 100 | 96  |
| BMAA0308 | conserved hypothetical protein                                         | 100 | 100 | 100 | 95  |
| BMAA0309 | AMP nucleosidase                                                       | 100 | 100 | 100 | 97  |
| BMAA0311 | portal protein, PBSX family, truncation                                | 100 | 98  | 95  | 94  |
| BMAA0318 | decarboxylase family protein                                           | 100 | 100 | 100 | 99  |
| BMAA0319 | DNA polymerase I                                                       | 100 | 99  | 100 | 95  |
| BMAA0320 | NADH dehydrogenase                                                     | 100 | 100 | 100 | 93  |
| BMAA0321 | conserved hypothetical protein                                         | 100 | 99  | 100 | 91  |
| BMAA0324 | carboxymethylenebutenolidase                                           | 100 | 99  | 100 | 92  |
| BMAA0325 | rhodanese domain protein                                               | 100 | 100 | 100 | 94  |
| BMAA0327 | iron-sulfur cluster-binding protein, rieske family                     | 100 | 100 | 100 | 97  |
| BMAA0328 | exonuclease VII, small subunit                                         | 100 | 100 | 100 | 97  |
| BMAA0329 | geranyltranstransferase                                                | 100 | 99  | 100 | 97  |
| BMAA0330 | 1-deoxy-D-xylulose-5-phosphate synthase                                | 100 | 100 | 100 | 98  |
| BMAA0331 | conserved hypothetical protein TIGR00294                               | 100 | 100 | 100 | 98  |
| BMAA0334 | O-sialoglycoprotein endopeptidase                                      | 100 | 99  | 100 | 97  |
| BMAA0335 | conserved hypothetical protein TIGR00275                               | 100 | 100 | 100 | 97  |
| BMAA0336 | ribosomal protein S21                                                  | 100 | 100 | 100 | 98  |
| BMAA0337 | GatB/Yqey family protein                                               | 100 | 100 | 100 | 95  |
| BMAA0338 | DNA primase                                                            | 100 | 99  | 100 | 97  |
| BMAA0339 | RNA polymerase sigma factor RpoD                                       | 100 | 100 | 100 | 99  |
| BMAA0343 | conserved hypothetical protein                                         | 100 | 100 | 100 | 95  |
| BMAA0345 | transcriptional regulator, LysR family                                 | 100 | 98  | 100 | 95  |
| BMAA0348 | amino acid/peptide transporter                                         | 100 | 99  | 100 | 97  |
| BMAA0349 | hypothetical protein                                                   | 100 | 98  | 100 | 91  |
| BMAA0350 | DNA-binding protein                                                    | 100 | 99  | 100 | 98  |
| BMAA0351 | oligopeptide ABC transporter, periplasmic oligopeptide-binding protein | 100 | 99  | 100 | 95  |
| BMAA0352 | oligopeptide ABC transporter, permease protein                         | 100 | 99  | 100 | 98  |
| BMAA0353 | oligopeptide ABC transporter, permease protein                         | 100 | 99  | 100 | 96  |
| BMAA0354 | oligopeptide ABC transporter, ATP-binding protein                      | 100 | 99  | 100 | 95  |
| BMAA0356 | outer membrane porin, OprD family                                      | 100 | 100 | 100 | 96  |
| BMAA0358 | dedA family protein                                                    | 100 | 100 | 100 | 94  |
| BMAA0360 | hypothetical protein                                                   | 100 | 99  | 99  | 91  |
| BMAA0362 | membrane protein, putative                                             | 100 | 99  | 100 | 98  |
| BMAA0363 | sigma-54 dependent DNA-binding transcriptional regulator               | 100 | 99  | 100 | 92  |
| BMAA0365 | H-NS histone family protein                                            | 100 | 98  | 100 | 96  |

|          |                                                                                          |     |     |     |    |
|----------|------------------------------------------------------------------------------------------|-----|-----|-----|----|
| BMAA0367 | acetyltransferase, GNAT family                                                           | 100 | 99  | 100 | 94 |
| BMAA0368 | hypothetical protein                                                                     | 100 | 100 | 100 | 97 |
| BMAA0369 | indole-3-acetamide hydrolase-related protein                                             | 100 | 99  | 100 | 92 |
| BMAA0370 | transcriptional regulator, lclR family                                                   | 100 | 100 | 100 | 91 |
| BMAA0373 | fumarylacetoacetate hydrolase family protein                                             | 100 | 99  | 100 | 96 |
| BMAA0376 | major facilitator family transporter                                                     | 100 | 100 | 100 | 91 |
| BMAA0385 | transcriptional regulator, LysR family                                                   | 100 | 99  | 99  | 90 |
| BMAA0387 | transcriptional regulator, LysR family                                                   | 100 | 99  | 100 | 90 |
| BMAA0388 | oxidoreductase, short chain dehydrogenase/reductase family                               | 100 | 99  | 100 | 93 |
| BMAA0392 | conserved hypothetical protein                                                           | 100 | 99  | 100 | 88 |
| BMAA0394 | lipoprotein, putative                                                                    | 100 | 100 | 100 | 87 |
| BMAA0396 | lipoprotein, putative                                                                    | 100 | 100 | 100 | 94 |
| BMAA0397 | conserved hypothetical protein                                                           | 100 | 99  | 100 | 96 |
| BMAA0398 | ompA family protein                                                                      | 100 | 100 | 100 | 96 |
| BMAA0399 | lipoprotein, putative                                                                    | 100 | 99  | 100 | 95 |
| BMAA0402 | conserved hypothetical protein                                                           | 100 | 99  | 100 | 90 |
| BMAA0403 | conserved hypothetical protein                                                           | 100 | 99  | 100 | 91 |
| BMAA0404 | conserved hypothetical protein                                                           | 100 | 100 | 100 | 98 |
| BMAA0405 | conserved hypothetical protein                                                           | 100 | 100 | 100 | 98 |
| BMAA0406 | conserved hypothetical protein                                                           | 96  | 100 | 99  | 93 |
| BMAA0407 | conserved hypothetical protein                                                           | 100 | 99  | 100 | 95 |
| BMAA0409 | ATP-dependent Clp protease, ATP-binding subunit ClpB, putative                           | 100 | 99  | 100 | 95 |
| BMAA0410 | Rhs element Vgr protein                                                                  | 100 | 99  | 100 | 97 |
| BMAA0416 | hypothetical protein                                                                     | 100 | 99  | 100 | 92 |
| BMAA0417 | cytosine/purines/uracil/thiamine/allantoin permease family protein                       | 100 | 99  | 100 | 97 |
| BMAA0418 | transcriptional regulator, Sir2 family                                                   | 100 | 98  | 100 | 89 |
| BMAA0419 | conserved hypothetical protein                                                           | 100 | 99  | 100 | 93 |
| BMAA0420 | 6-phosphogluconate dehydrogenase, decarboxylating                                        | 100 | 100 | 100 | 97 |
| BMAA0421 | hypothetical protein                                                                     | 100 | 99  | 100 | 91 |
| BMAA0422 | conserved hypothetical protein                                                           | 100 | 100 | 100 | 94 |
| BMAA0423 | lipoprotein NlpD, putative                                                               | 100 | 100 | 100 | 92 |
| BMAA0424 | membrane protein, putative                                                               | 100 | 100 | 100 | 95 |
| BMAA0425 | cytochrome b561, putative                                                                | 100 | 100 | 100 | 94 |
| BMAA0427 | TonB-dependent copper receptor                                                           | 100 | 98  | 100 | 92 |
| BMAA0429 | lipase chaperone                                                                         | 100 | 99  | 100 | 88 |
| BMAA0430 | transcriptional regulator, GntR family                                                   | 100 | 99  | 100 | 96 |
| BMAA0431 | spermidine/putrescine ABC transporter, ATP-binding protein                               | 100 | 99  | 100 | 94 |
| BMAA0432 | spermidine/putrescine ABC transporter, periplasmic spermidine/putrescine-binding protein | 100 | 99  | 100 | 95 |
| BMAA0433 | spermidine/putrescine ABC transporter, permease protein                                  | 100 | 100 | 100 | 97 |
| BMAA0438 | conserved hypothetical protein, truncation                                               | 100 | 100 | 100 | 96 |
| BMAA0439 | conserved hypothetical protein                                                           | 100 | 100 | 100 | 99 |
| BMAA0440 | conserved hypothetical protein                                                           | 100 | 99  | 100 | 98 |
| BMAA0441 | conserved hypothetical protein                                                           | 100 | 99  | 99  | 96 |
| BMAA0442 | conserved hypothetical protein                                                           | 100 | 100 | 100 | 96 |
| BMAA0443 | conserved hypothetical protein                                                           | 100 | 100 | 100 | 93 |
| BMAA0444 | ATP-dependent Clp protease, ATP-binding subunit ClpB, putative, authentic point mutation | 100 | 99  | 100 | 92 |
| BMAA0445 | Rhs element Vgr protein                                                                  | 100 | 97  | 100 | 94 |
| BMAA0446 | Rhs element Vgr protein                                                                  | 100 | 100 | 100 | 95 |
| BMAA0447 | conserved hypothetical protein                                                           | 100 | 100 | 100 | 97 |

|          |                                                                |     |     |     |    |
|----------|----------------------------------------------------------------|-----|-----|-----|----|
| BMAA0448 | pentapeptide repeat family protein                             | 100 | 99  | 100 | 91 |
| BMAA0449 | conserved hypothetical protein                                 | 100 | 99  | 100 | 97 |
| BMAA0450 | conserved hypothetical protein                                 | 100 | 100 | 100 | 99 |
| BMAA0451 | lipoprotein, putative                                          | 100 | 98  | 100 | 90 |
| BMAA0452 | conserved hypothetical protein, authentic point mutation       | 100 | 99  | 100 | 98 |
| BMAA0453 | OmpA domain protein                                            | 100 | 99  | 99  | 92 |
| BMAA0454 | conserved hypothetical protein                                 | 100 | 99  | 100 | 97 |
| BMAA0455 | conserved hypothetical protein                                 | 100 | 100 | 100 | 97 |
| BMAA0457 | hypothetical protein                                           | 100 | 98  | 100 | 92 |
| BMAA0459 | rhamnosyltransferase I, subunit A                              | 100 | 99  | 100 | 96 |
| BMAA0460 | rhamnosyltransferase I, subunit B                              | 100 | 99  | 100 | 89 |
| BMAA0461 | multidrug resistance protein                                   | 100 | 99  | 98  | 95 |
| BMAA0462 | rhamnosyltransferase II                                        | 100 | 99  | 98  | 89 |
| BMAA0463 | RND efflux system, outer membrane lipoprotein, NodT family     | 100 | 99  | 98  | 91 |
| BMAA0464 | multidrug resistance protein, putative                         | 100 | 99  | 99  | 91 |
| BMAA0466 | levansucrase                                                   | 100 | 100 | 100 | 94 |
| BMAA0467 | raffinose repressor, putative                                  | 100 | 99  | 100 | 92 |
| BMAA0468 | glutathione-independent formaldehyde dehydrogenase             | 100 | 99  | 100 | 96 |
| BMAA0469 | transcriptional regulator, AraC family                         | 100 | 100 | 96  | 98 |
| BMAA0471 | serine hydroxymethyltransferase 2                              | 100 | 99  | 100 | 97 |
| BMAA0472 | renal dipeptidase family protein                               | 100 | 100 | 100 | 96 |
| BMAA0473 | conserved hypothetical protein                                 | 100 | 100 | 100 | 94 |
| BMAA0474 | oxidoreductase, FAD/FMN-binding                                | 100 | 99  | 100 | 97 |
| BMAA0475 | iron-sulfur cluster binding protein                            | 100 | 100 | 100 | 94 |
| BMAA0476 | electron transfer flavoprotein, subunit alpha, putative        | 100 | 99  | 100 | 89 |
| BMAA0477 | conserved hypothetical protein                                 | 100 | 99  | 100 | 92 |
| BMAA0478 | iron-sulfur cluster-binding protein, rieske family             | 100 | 99  | 100 | 98 |
| BMAA0479 | ferredoxin, 2Fe-2S, putative                                   | 100 | 99  | 100 | 93 |
| BMAA0480 | ABC transporter, periplasmic glycine/betaine-binding protein   | 100 | 100 | 99  | 94 |
| BMAA0481 | amino acid transporter, putative                               | 100 | 99  | 100 | 96 |
| BMAA0482 | formyltetrahydrofolate deformylase                             | 100 | 100 | 100 | 97 |
| BMAA0483 | transcriptional regulator, LysR family                         | 100 | 99  | 100 | 96 |
| BMAA0484 | choline sulfatase                                              | 100 | 100 | 100 | 95 |
| BMAA0486 | outer membrane porin, putative                                 | 100 | 100 | 100 | 98 |
| BMAA0487 | leucine aminopeptidase, putative                               | 100 | 99  | 100 | 92 |
| BMAA0488 | metallopeptidase domain protein                                | 100 | 99  | 100 | 93 |
| BMAA0489 | transcriptional regulator, AraC family                         | 100 | 99  | 99  | 94 |
| BMAA0490 | ABC transporter, periplasmic glycine/betaine-binding protein   | 100 | 99  | 100 | 96 |
| BMAA0491 | conserved hypothetical protein                                 | 100 | 99  | 100 | 95 |
| BMAA0492 | 3-hydroxyacyl-CoA dehydrogenase family protein                 | 100 | 99  | 99  | 95 |
| BMAA0493 | conserved hypothetical protein                                 | 100 | 100 | 100 | 95 |
| BMAA0494 | lipase, putative                                               | 100 | 99  | 100 | 86 |
| BMAA0495 | hypothetical protein                                           | 100 | 100 | 100 | 95 |
| BMAA0499 | amino acid permease                                            | 100 | 99  | 100 | 97 |
| BMAA0500 | class III extradiol-type catecholic dioxygenase family protein | 100 | 99  | 100 | 93 |
| BMAA0501 | 3-octaprenyl-4-hydroxybenzoate carboxy-lyase                   | 100 | 99  | 100 | 94 |
| BMAA0502 | glutaredoxin-related protein                                   | 100 | 100 | 100 | 99 |
| BMAA0503 | hemK protein                                                   | 100 | 99  | 100 | 92 |
| BMAA0504 | peptide chain release factor 1                                 | 100 | 99  | 100 | 99 |

|          |                                                                                                  |     |     |     |    |
|----------|--------------------------------------------------------------------------------------------------|-----|-----|-----|----|
| BMAA0505 | glutamyl-tRNA reductase                                                                          | 100 | 100 | 100 | 99 |
| BMAA0507 | peptidase, M24 family protein                                                                    | 100 | 99  | 100 | 97 |
| BMAA0508 | isochorismatase family protein                                                                   | 100 | 99  | 100 | 92 |
| BMAA0509 | HAD-superfamily hydrolase                                                                        | 100 | 100 | 100 | 90 |
| BMAA0510 | ABC transporter, ATP-binding protein                                                             | 100 | 100 | 100 | 96 |
| BMAA0515 | GABA permease                                                                                    | 100 | 99  | 100 | 92 |
| BMAA0519 | GTP-binding protein YchF                                                                         | 100 | 100 | 100 | 98 |
| BMAA0521 | hypothetical protein                                                                             | 100 | 100 | 100 | 97 |
| BMAA0524 | monooxygenase family protein                                                                     | 100 | 99  | 100 | 97 |
| BMAA0525 | thiol:disulfide interchange protein DsbC, putative                                               | 100 | 100 | 100 | 98 |
| BMAA0526 | PDZ domain protein                                                                               | 100 | 99  | 100 | 94 |
| BMAA0527 | acyl carrier protein phosphodiesterase                                                           | 100 | 100 | 100 | 93 |
| BMAA0528 | uracil-DNA glycosylase                                                                           | 100 | 98  | 100 | 91 |
| BMAA0529 | adenylate cyclase, putative                                                                      | 100 | 98  | 100 | 90 |
| BMAA0530 | indole-3-glycerol phosphate synthase                                                             | 100 | 98  | 100 | 93 |
| BMAA0531 | anthranilate phosphoribosyltransferase                                                           | 100 | 100 | 100 | 97 |
| BMAA0532 | anthranilate synthase component II                                                               | 100 | 100 | 100 | 98 |
| BMAA0533 | anthranilate synthase component I                                                                | 100 | 100 | 100 | 97 |
| BMAA0534 | phosphoglycolate phosphatase                                                                     | 100 | 99  | 100 | 93 |
| BMAA0535 | ribulose-phosphate 3-epimerase                                                                   | 100 | 99  | 100 | 97 |
| BMAA0536 | apaG protein                                                                                     | 100 | 100 | 100 | 98 |
| BMAA0538 | membrane-bound lytic murein transglycosylase A, putative                                         | 100 | 100 | 100 | 96 |
| BMAA0539 | phenylacetate-coenzyme A ligase                                                                  | 100 | 99  | 100 | 97 |
| BMAA0541 | enoyl-CoA hydratase/isomerase family protein                                                     | 100 | 100 | 100 | 93 |
| BMAA0543 | aldehyde dehydrogenase family protein                                                            | 100 | 99  | 100 | 94 |
| BMAA0544 | enoyl-CoA hydratase/isomerase family protein                                                     | 100 | 100 | 100 | 97 |
| BMAA0557 | arsenical resistance protein, putative                                                           | 100 | 99  | 100 | 90 |
| BMAA0558 | arsenate reductase                                                                               | 100 | 100 | 100 | 89 |
| BMAA0560 | arsenical resistance transcriptional regulator                                                   | 100 | 100 | 100 | 91 |
| BMAA0561 | hypothetical protein                                                                             | 100 | 100 | 100 | 91 |
| BMAA0564 | glycine betaine/L-proline ABC transporter, ATP-binding protein                                   | 100 | 100 | 100 | 98 |
| BMAA0565 | glycine betaine/L-proline ABC transporter, permease protein, putative                            | 100 | 100 | 100 | 97 |
| BMAA0566 | transcriptional regulator, AraC family                                                           | 100 | 99  | 100 | 96 |
| BMAA0567 | glycine betaine/L-proline ABC transporter, periplasmic glycine betaine/L-proline-binding protein | 100 | 100 | 100 | 98 |
| BMAA0571 | conserved hypothetical protein                                                                   | 100 | 100 | 100 | 93 |
| BMAA0572 | conserved hypothetical protein                                                                   | 100 | 100 | 100 | 91 |
| BMAA0573 | hydroxypyruvate isomerase                                                                        | 100 | 99  | 100 | 96 |
| BMAA0574 | major facilitator family transporter                                                             | 100 | 99  | 100 | 94 |
| BMAA0575 | class II aldolase/adducin domain protein                                                         | 100 | 100 | 100 | 96 |
| BMAA0576 | conserved hypothetical protein                                                                   | 100 | 98  | 100 | 92 |
| BMAA0577 | 2-hydroxy-3-oxopropionate reductase                                                              | 100 | 99  | 100 | 95 |
| BMAA0578 | transcriptional regulator, GntR family                                                           | 100 | 100 | 100 | 96 |
| BMAA0579 | HAD-superfamily hydrolase                                                                        | 100 | 100 | 100 | 91 |
| BMAA0589 | conserved hypothetical protein                                                                   | 100 | 100 | 100 | 96 |
| BMAA0590 | transcriptional regulator, LuxR family                                                           | 100 | 100 | 100 | 96 |
| BMAA0591 | amino acid permease                                                                              | 100 | 99  | 100 | 96 |
| BMAA0592 | D-aminopeptidase, putative                                                                       | 100 | 98  | 100 | 96 |
| BMAA0593 | lipoprotein, putative                                                                            | 100 | 98  | 98  | 90 |
| BMAA0595 | fusaric acid resistance domain protein                                                           | 100 | 99  | 100 | 95 |



|          |                                                                              |     |     |     |    |
|----------|------------------------------------------------------------------------------|-----|-----|-----|----|
| BMAA0596 | transcriptional regulator, LysR family                                       | 100 | 99  | 100 | 99 |
| BMAA0599 | outer membrane porin, putative                                               | 100 | 99  | 100 | 97 |
| BMAA0601 | cytosine permease                                                            | 100 | 99  | 100 | 96 |
| BMAA0602 | DNA-binding protein                                                          | 100 | 99  | 100 | 95 |
| BMAA0603 | cytosine deaminase                                                           | 100 | 100 | 100 | 94 |
| BMAA0612 | twin-arginine translocation pathway signal sequence domain protein           | 100 | 99  | 100 | 90 |
| BMAA0615 | DNA-binding response regulator, LuxR family                                  | 100 | 99  | 100 | 90 |
| BMAA0622 | senescence marker protein-30 family protein                                  | 100 | 99  | 100 | 87 |
| BMAA0624 | conserved hypothetical protein                                               | 100 | 100 | 100 | 95 |
| BMAA0636 | transcriptional regulator, IclR family                                       | 100 | 100 | 100 | 95 |
| BMAA0637 | sugar ABC transporter, periplasmic sugar-binding protein                     | 100 | 99  | 100 | 95 |
| BMAA0638 | sugar ABC transporter, ATP-binding protein                                   | 100 | 99  | 100 | 91 |
| BMAA0639 | sugar ABC transporter, permease protein                                      | 100 | 99  | 100 | 95 |
| BMAA0641 | hydrolase                                                                    | 100 | 100 | 100 | 89 |
| BMAA0642 | oxidoreductase, short chain dehydrogenase/reductase family                   | 100 | 99  | 100 | 93 |
| BMAA0643 | fumarylacetoacetate hydrolase family protein                                 | 100 | 100 | 100 | 93 |
| BMAA0644 | oxidoreductase, short-chain dehydrogenase/reductase family                   | 100 | 100 | 99  | 89 |
| BMAA0645 | conserved hypothetical protein                                               | 100 | 99  | 100 | 92 |
| BMAA0658 | transcriptional regulator, TetR family                                       | 100 | 99  | 100 | 91 |
| BMAA0659 | conserved hypothetical protein                                               | 100 | 100 | 100 | 93 |
| BMAA0660 | amino acid ABC transporter, periplasmic amino acid-binding protein, putative | 100 | 99  | 100 | 96 |
| BMAA0662 | hemolysin III                                                                | 100 | 99  | 100 | 97 |
| BMAA0665 | leucine-responsive regulatory protein, putative                              | 100 | 100 | 100 | 99 |
| BMAA0666 | aromatic amino acid transport protein                                        | 100 | 99  | 100 | 95 |
| BMAA0667 | aromatic-amino-acid aminotransferase                                         | 100 | 100 | 100 | 97 |
| BMAA0668 | conserved hypothetical protein                                               | 100 | 100 | 100 | 93 |
| BMAA0672 | oxidoreductase, 2OG-Fe(II) oxygenase family                                  | 100 | 99  | 100 | 89 |
| BMAA0673 | hypothetical protein                                                         | 100 | 100 | 100 | 87 |
| BMAA0677 | sensor histidine kinase                                                      | 99  | 97  | 95  | 87 |
| BMAA0678 | response regulator                                                           | 100 | 100 | 100 | 93 |
| BMAA0679 | CheC family protein                                                          | 100 | 100 | 100 | 98 |
| BMAA0681 | conserved hypothetical protein                                               | 100 | 99  | 100 | 91 |
| BMAA0694 | microbial collagenase, putative                                              | 100 | 99  | 100 | 92 |
| BMAA0696 | monooxygenase family protein                                                 | 100 | 99  | 100 | 86 |
| BMAA0698 | DNA-binding protein                                                          | 100 | 99  | 100 | 86 |
| BMAA0699 | hypothetical protein                                                         | 100 | 98  | 100 | 96 |
| BMAA0701 | conserved hypothetical protein                                               | 100 | 100 | 100 | 98 |
| BMAA0702 | hypothetical protein                                                         | 100 | 100 | 100 | 97 |
| BMAA0705 | universal stress protein family                                              | 100 | 98  | 100 | 91 |
| BMAA0706 | conserved hypothetical protein                                               | 100 | 100 | 100 | 93 |
| BMAA0707 | universal stress protein family                                              | 100 | 100 | 100 | 95 |
| BMAA0708 | conserved hypothetical protein                                               | 100 | 100 | 100 | 96 |
| BMAA0709 | alcohol dehydrogenase, zinc-containing                                       | 100 | 100 | 100 | 94 |
| BMAA0711 | dedA family protein                                                          | 100 | 99  | 100 | 95 |
| BMAA0712 | major facilitator superfamily protein                                        | 100 | 100 | 99  | 96 |
| BMAA0714 | oxidoreductase, short-chain dehydrogenase/reductase family                   | 100 | 99  | 100 | 92 |
| BMAA0717 | amino acid permease                                                          | 100 | 99  | 100 | 96 |
| BMAA0719 | DNA-binding protein                                                          | 100 | 98  | 100 | 98 |
| BMAA0720 | H-NS histone family protein                                                  | 100 | 100 | 100 | 91 |

|          |                                                      |     |     |     |    |
|----------|------------------------------------------------------|-----|-----|-----|----|
| BMAA0723 | conserved hypothetical protein                       | 100 | 99  | 100 | 93 |
| BMAA0731 | hypothetical protein                                 | 100 | 99  | 100 | 87 |
| BMAA0732 | conserved hypothetical protein                       | 100 | 99  | 100 | 92 |
| BMAA0734 | conserved domain protein                             | 100 | 100 | 100 | 90 |
| BMAA0737 | Rhs element Vgr protein                              | 100 | 99  | 99  | 91 |
| BMAA0739 | conserved hypothetical protein                       | 100 | 99  | 100 | 90 |
| BMAA0740 | conserved hypothetical protein                       | 100 | 99  | 100 | 89 |
| BMAA0743 | conserved hypothetical protein                       | 100 | 100 | 100 | 92 |
| BMAA0744 | conserved hypothetical protein                       | 100 | 99  | 100 | 90 |
| BMAA0745 | sensor histidine kinase                              | 100 | 99  | 100 | 86 |
| BMAA0746 | DNA-binding response regulator                       | 100 | 99  | 99  | 93 |
| BMAA0750 | conserved hypothetical protein                       | 100 | 97  | 100 | 88 |
| BMAA0753 | SCO1/SenC family protein                             | 100 | 99  | 100 | 87 |
| BMAA0754 | conserved hypothetical protein                       | 100 | 98  | 100 | 93 |
| BMAA0755 | outer membrane nitrite reductase, putative           | 100 | 99  | 100 | 93 |
| BMAA0756 | conserved hypothetical protein                       | 100 | 100 | 100 | 92 |
| BMAA0757 | conserved hypothetical protein                       | 100 | 100 | 100 | 98 |
| BMAA0758 | conserved hypothetical protein                       | 100 | 99  | 100 | 94 |
| BMAA0760 | NH3-dependent NAD+ synthetase                        | 100 | 99  | 100 | 92 |
| BMAA0762 | membrane protein, putative                           | 100 | 99  | 100 | 91 |
| BMAA0763 | hypothetical protein                                 | 100 | 100 | 100 | 90 |
| BMAA0770 | transcriptional regulator, DeoR family               | 100 | 99  | 100 | 96 |
| BMAA0772 | hypothetical protein                                 | 100 | 99  | 100 | 92 |
| BMAA0773 | transcriptional regulator, TetR family, putative     | 100 | 100 | 100 | 95 |
| BMAA0774 | oxidoreductase, FAD-binding                          | 100 | 99  | 99  | 92 |
| BMAA0776 | transcriptional regulator, LysR family               | 100 | 100 | 100 | 97 |
| BMAA0777 | conserved hypothetical protein                       | 100 | 99  | 100 | 95 |
| BMAA0779 | piperideine-6-carboxylate dehydrogenase              | 100 | 99  | 100 | 97 |
| BMAA0782 | conserved hypothetical protein                       | 100 | 100 | 100 | 96 |
| BMAA0783 | conserved hypothetical protein                       | 100 | 100 | 100 | 86 |
| BMAA0784 | DNA-binding response regulator                       | 100 | 100 | 100 | 92 |
| BMAA0785 | sensor histidine kinase                              | 100 | 99  | 100 | 90 |
| BMAA0787 | acetyltransferase, GNAT family                       | 100 | 100 | 96  | 93 |
| BMAA0788 | major facilitator family transporter                 | 100 | 100 | 100 | 96 |
| BMAA0790 | conserved hypothetical protein                       | 100 | 100 | 100 | 94 |
| BMAA0801 | transcriptional regulator, TetR family               | 100 | 100 | 100 | 93 |
| BMAA0802 | isovaleryl-CoA dehydrogenase                         | 100 | 99  | 100 | 96 |
| BMAA0803 | carboxyl transferase domain protein                  | 100 | 99  | 100 | 97 |
| BMAA0804 | enoyl-CoA hydratase/isomerase family protein         | 100 | 100 | 100 | 96 |
| BMAA0805 | acetyl-CoA carboxylase, biotin carboxylase, putative | 100 | 99  | 100 | 95 |
| BMAA0806 | hypothetical protein                                 | 100 | 100 | 100 | 97 |
| BMAA0808 | hypothetical protein                                 | 100 | 99  | 100 | 97 |
| BMAA0809 | hypothetical protein                                 | 100 | 99  | 100 | 94 |
| BMAA0814 | glutaminase A                                        | 100 | 100 | 100 | 92 |
| BMAA0815 | DNA-binding response regulator                       | 100 | 100 | 100 | 96 |
| BMAA0816 | sensor histidine kinase                              | 100 | 100 | 99  | 91 |
| BMAA0818 | outer membrane protein, OMP85 family, putative       | 100 | 99  | 100 | 87 |
| BMAA0819 | rod shape-determining protein MreB, putative         | 100 | 100 | 100 | 96 |
| BMAA0822 | conserved hypothetical protein                       | 100 | 99  | 100 | 96 |

|          |                                                                    |     |     |     |    |
|----------|--------------------------------------------------------------------|-----|-----|-----|----|
| BMAA0826 | glyoxalase family protein                                          | 100 | 99  | 100 | 92 |
| BMAA0827 | glutathione S-transferase, putative                                | 100 | 99  | 100 | 91 |
| BMAA0828 | conserved hypothetical protein                                     | 100 | 99  | 100 | 94 |
| BMAA0829 | sensor histidine kinase                                            | 100 | 100 | 100 | 94 |
| BMAA0830 | DNA-binding response regulator                                     | 100 | 100 | 100 | 97 |
| BMAA0831 | conserved hypothetical protein                                     | 100 | 100 | 100 | 97 |
| BMAA0833 | immunity protein, putative                                         | 100 | 96  | 100 | 87 |
| BMAA0834 | rhodanese-like domain protein                                      | 100 | 98  | 100 | 92 |
| BMAA0835 | transcriptional regulator, AraC family                             | 100 | 99  | 100 | 95 |
| BMAA0836 | peptidase, M20/M25/M40 family                                      | 100 | 99  | 99  | 96 |
| BMAA0839 | membrane protein, putative                                         | 100 | 99  | 100 | 93 |
| BMAA0847 | ISBma3, transposase, truncation                                    | 100 | 95  | 100 | 89 |
| BMAA0848 | 4-hydroxyphenylpyruvate dioxygenase, putative                      | 100 | 99  | 100 | 88 |
| BMAA0849 | 3-dehydroquininate dehydratase, type II                            | 100 | 99  | 100 | 92 |
| BMAA0850 | shikimate 5-dehydrogenase, putative                                | 100 | 98  | 100 | 91 |
| BMAA0851 | D-galactonate transporter, putative                                | 100 | 100 | 100 | 95 |
| BMAA0852 | aminotransferase, class V                                          | 100 | 99  | 100 | 94 |
| BMAA0855 | ABC transporter, periplasmic substrate-binding protein             | 100 | 99  | 100 | 97 |
| BMAA0856 | ABC transporter, ATP-binding protein                               | 100 | 99  | 100 | 97 |
| BMAA0857 | ABC transporter, permease protein                                  | 100 | 100 | 100 | 93 |
| BMAA0858 | ABC transporter, permease protein                                  | 100 | 98  | 100 | 94 |
| BMAA0859 | phosphonoacetate hydrolase                                         | 100 | 100 | 100 | 93 |
| BMAA0860 | glyceraldehyde-3-phosphate dehydrogenase, NADP-dependent, putative | 100 | 100 | 100 | 97 |
| BMAA0861 | conserved hypothetical protein                                     | 100 | 100 | 97  | 93 |
| BMAA0874 | conserved hypothetical protein                                     | 100 | 99  | 97  | 94 |
| BMAA0875 | oxidoreductase, aldo/keto reductase family                         | 100 | 99  | 100 | 94 |
| BMAA0876 | D-beta-hydroxybutyrate dehydrogenase                               | 100 | 100 | 97  | 97 |
| BMAA0879 | aromatic-amino-acid aminotransferase                               | 100 | 100 | 100 | 99 |
| BMAA0880 | excinuclease ABC, B subunit                                        | 100 | 100 | 100 | 98 |
| BMAA0881 | antigen, putative                                                  | 100 | 100 | 100 | 97 |
| BMAA0882 | conserved hypothetical protein                                     | 100 | 100 | 100 | 96 |
| BMAA0883 | iron permease, FTR1 family                                         | 100 | 100 | 100 | 97 |
| BMAA0884 | membrane protein, putative                                         | 100 | 99  | 100 | 94 |
| BMAA0885 | glcG protein                                                       | 100 | 100 | 100 | 94 |
| BMAA0892 | sarcosine oxidase, alpha subunit, truncation                       | 100 | 99  | 100 | 97 |
| BMAA0894 | dihydroneopterin aldolase, putative                                | 100 | 98  | 98  | 92 |
| BMAA0896 | ribosomal protein S21                                              | 100 | 98  | 100 | 95 |
| BMAA0899 | cold-shock domain family protein                                   | 100 | 100 | 100 | 97 |
| BMAA0907 | conserved hypothetical protein                                     | 100 | 100 | 100 | 92 |
| BMAA0908 | sensory box histidine kinase                                       | 100 | 99  | 100 | 88 |
| BMAA0909 | response regulator                                                 | 100 | 100 | 99  | 95 |
| BMAA0910 | sensory box histidine kinase/response regulator                    | 100 | 99  | 100 | 95 |
| BMAA0912 | hypothetical protein                                               | 100 | 99  | 100 | 94 |
| BMAA0914 | choline dehydrogenase                                              | 100 | 99  | 100 | 97 |
| BMAA0915 | betaine aldehyde dehydrogenase                                     | 100 | 99  | 100 | 97 |
| BMAA0916 | regulatory protein betI                                            | 100 | 99  | 99  | 92 |
| BMAA0919 | rhamnosyltransferase 1, subunit A                                  | 100 | 99  | 100 | 96 |
| BMAA0921 | rhamnosyltransferase I, subunit B                                  | 100 | 99  | 100 | 89 |
| BMAA0922 | drug resistance transporter, EmrB/QacA family                      | 100 | 99  | 98  | 95 |

|          |                                                                           |     |     |     |    |
|----------|---------------------------------------------------------------------------|-----|-----|-----|----|
| BMAA0923 | rhamnosyltransferase family protein                                       | 100 | 99  | 98  | 89 |
| BMAA0924 | RND efflux system, outer membrane lipoprotein, NodT family                | 100 | 99  | 98  | 91 |
| BMAA0925 | multidrug resistance protein                                              | 100 | 99  | 100 | 89 |
| BMAA0927 | prolyl oligopeptidase family protein                                      | 100 | 99  | 97  | 90 |
| BMAA0934 | cytochrome b561 family protein                                            | 100 | 98  | 100 | 93 |
| BMAA0937 | transcriptional regulator, ArsR family                                    | 100 | 100 | 100 | 92 |
| BMAA0938 | YeeE/YedE family protein                                                  | 100 | 97  | 100 | 88 |
| BMAA0939 | membrane protein, putative                                                | 100 | 100 | 100 | 94 |
| BMAA0940 | acetyltransferase, GNAT family                                            | 100 | 98  | 100 | 89 |
| BMAA0942 | conserved hypothetical protein                                            | 100 | 100 | 100 | 90 |
| BMAA0943 | conserved hypothetical protein                                            | 100 | 98  | 100 | 86 |
| BMAA0944 | conserved hypothetical protein                                            | 100 | 100 | 100 | 93 |
| BMAA0946 | Ser/Thr protein phosphatase family protein                                | 100 | 98  | 100 | 94 |
| BMAA0947 | hydrolase                                                                 | 100 | 98  | 100 | 88 |
| BMAA0949 | transcriptional regulator, GntR family                                    | 100 | 100 | 100 | 97 |
| BMAA0951 | leucine-responsive regulatory protein, putative                           | 100 | 100 | 100 | 95 |
| BMAA0952 | 1-aminocyclopropane-1-carboxylate deaminase                               | 100 | 100 | 100 | 97 |
| BMAA0966 | membrane protein, putative                                                | 100 | 99  | 100 | 89 |
| BMAA0968 | phosphoesterase family protein                                            | 100 | 99  | 99  | 87 |
| BMAA0970 | esterase, putative                                                        | 100 | 100 | 100 | 90 |
| BMAA0971 | choline/carnitine/betaine transporter                                     | 100 | 99  | 100 | 96 |
| BMAA0972 | SIS domain protein                                                        | 100 | 99  | 99  | 94 |
| BMAA0973 | asparaginase family protein                                               | 100 | 97  | 100 | 91 |
| BMAA0974 | dipeptide ABC transporter, ATP-binding protein, putative                  | 100 | 98  | 100 | 90 |
| BMAA0975 | dipeptide ABC transporter periplasmic dipeptide-binding protein, putative | 100 | 100 | 100 | 95 |
| BMAA0976 | dipeptide ABC transporter, permease protein, putative                     | 100 | 99  | 100 | 97 |
| BMAA0977 | dipeptide ABC transporter, permease protein, putative                     | 100 | 99  | 100 | 96 |
| BMAA0979 | dipeptide transport protein, putative                                     | 100 | 100 | 100 | 93 |
| BMAA0980 | protocatechuate 3,4-dioxygenase, alpha subunit                            | 100 | 99  | 100 | 92 |
| BMAA0981 | protocatechuate 3,4-dioxygenase, beta subunit                             | 100 | 100 | 100 | 97 |
| BMAA0982 | transcriptional regulator, LysR family                                    | 100 | 99  | 99  | 91 |
| BMAA0984 | GGDEF domain protein                                                      | 100 | 99  | 100 | 91 |
| BMAA0986 | O-methyltransferase family protein                                        | 100 | 99  | 100 | 90 |
| BMAA0987 | phospho-2-dehydro-3-deoxyheptonate aldolase                               | 100 | 100 | 100 | 95 |
| BMAA0988 | DGPF domain protein                                                       | 100 | 100 | 96  | 90 |
| BMAA0990 | amino acid permease                                                       | 100 | 99  | 100 | 92 |
| BMAA0995 | hypothetical protein                                                      | 100 | 99  | 100 | 94 |
| BMAA0996 | gamma-glutamyltranspeptidase                                              | 100 | 99  | 100 | 95 |
| BMAA0997 | outer membrane protein TolC, putative                                     | 100 | 99  | 100 | 97 |
| BMAA0998 | hypothetical protein                                                      | 100 | 100 | 100 | 98 |
| BMAA1000 | ABC transporter, permease/ATP-binding protein                             | 100 | 99  | 100 | 98 |
| BMAA1001 | hypothetical protein                                                      | 100 | 100 | 100 | 96 |
| BMAA1002 | secretion protein, putative                                               | 100 | 99  | 100 | 98 |
| BMAA1003 | conserved hypothetical protein                                            | 100 | 99  | 100 | 94 |
| BMAA1006 | threonine dehydratase, biosynthetic, truncation                           | 100 | 98  | 100 | 91 |
| BMAA1010 | conserved hypothetical protein                                            | 100 | 100 | 100 | 93 |
| BMAA1027 | sensor histidine kinase IrlS                                              | 100 | 99  | 100 | 90 |
| BMAA1028 | DNA-binding response regulator IrlR                                       | 100 | 100 | 100 | 97 |
| BMAA1029 | heavy metal efflux pump CzcA                                              | 100 | 99  | 100 | 93 |

|          |                                                                            |     |     |     |    |
|----------|----------------------------------------------------------------------------|-----|-----|-----|----|
| BMAA1030 | heavy metal resistance protein CzcB                                        | 100 | 99  | 100 | 88 |
| BMAA1036 | conserved hypothetical protein                                             | 100 | 99  | 100 | 91 |
| BMAA1037 | YbaK / prolyl-tRNA synthetases-associated domain family protein            | 100 | 100 | 100 | 97 |
| BMAA1039 | serine protease, rhomboid family                                           | 100 | 99  | 100 | 87 |
| BMAA1040 | ATP-dependent metalloprotease, FtsH family                                 | 100 | 99  | 100 | 91 |
| BMAA1042 | conserved hypothetical protein                                             | 100 | 99  | 100 | 95 |
| BMAA1043 | conserved hypothetical protein                                             | 100 | 99  | 100 | 96 |
| BMAA1044 | efflux transporter, RND family, MFP subunit                                | 100 | 99  | 100 | 96 |
| BMAA1045 | hydrophobe/amphiphile efflux family protein                                | 100 | 99  | 100 | 98 |
| BMAA1046 | RND efflux system, outer membrane lipoprotein, NodT family                 | 100 | 99  | 98  | 95 |
| BMAA1048 | GTP cyclohydrolase II                                                      | 100 | 100 | 100 | 99 |
| BMAA1049 | WD domain protein                                                          | 100 | 99  | 100 | 98 |
| BMAA1050 | conserved hypothetical protein                                             | 97  | 99  | 97  | 96 |
| BMAA1056 | penicillin-binding protein                                                 | 100 | 99  | 100 | 96 |
| BMAA1057 | periplasmic sugar-binding protein, putative                                | 100 | 100 | 100 | 97 |
| BMAA1058 | oxidoreductase, short chain dehydrogenase/reductase family                 | 100 | 100 | 100 | 95 |
| BMAA1059 | potassium efflux system protein, putative                                  | 100 | 98  | 100 | 91 |
| BMAA1062 | conserved hypothetical protein                                             | 100 | 99  | 100 | 96 |
| BMAA1063 | conserved domain protein                                                   | 100 | 99  | 100 | 91 |
| BMAA1064 | hypothetical protein                                                       | 100 | 98  | 100 | 89 |
| BMAA1069 | transcriptional regulator, DeoR family                                     | 100 | 100 | 100 | 88 |
| BMAA1070 | transporter, putative                                                      | 100 | 100 | 100 | 87 |
| BMAA1073 | sugar ABC transporter, periplasmic sugar-binding protein, putative         | 100 | 98  | 100 | 93 |
| BMAA1074 | sugar ABC transporter, permease protein, putative                          | 100 | 100 | 100 | 94 |
| BMAA1075 | sugar ABC transporter, permease protein, putative                          | 100 | 99  | 100 | 95 |
| BMAA1076 | oxidoreductase, zinc-binding dehydrogenase family                          | 100 | 99  | 100 | 96 |
| BMAA1077 | sugar ABC transporter, ATP-binding protein, putative                       | 100 | 98  | 98  | 90 |
| BMAA1078 | transcriptional regulator, AraC family                                     | 100 | 100 | 100 | 90 |
| BMAA1079 | xylulokinase                                                               | 100 | 97  | 100 | 95 |
| BMAA1084 | nitrate reductase/sulfite reductase flavoprotein alpha-component, putative | 100 | 99  | 100 | 91 |
| BMAA1085 | nitrite reductase [NAD(P)H], small subunit                                 | 100 | 100 | 100 | 92 |
| BMAA1086 | nitrite reductase [NAD(P)H], large subunit                                 | 100 | 99  | 100 | 93 |
| BMAA1087 | nitrate transporter, putative                                              | 100 | 99  | 100 | 96 |
| BMAA1089 | uroporphyrin-III C-methyltransferase                                       | 100 | 100 | 97  | 87 |
| BMAA1090 | response regulator NasT                                                    | 100 | 100 | 100 | 93 |
| BMAA1091 | regulatory protein NasS, putative                                          | 100 | 95  | 100 | 92 |
| BMAA1096 | lipoprotein, putative                                                      | 100 | 99  | 100 | 91 |
| BMAA1098 | acetylpolyamine aminohydrolase, putative                                   | 100 | 99  | 100 | 92 |
| BMAA1099 | N-carbamyl-L-amino acid amidohydrolase                                     | 100 | 99  | 100 | 86 |
| BMAA1100 | major facilitator family transporter                                       | 100 | 99  | 100 | 96 |
| BMAA1101 | transcriptional regulator, LysR family, frameshift                         | 100 | 99  | 100 | 98 |
| BMAA1104 | oxidoreductase, short chain dehydrogenase/reductase family                 | 100 | 100 | 100 | 92 |
| BMAA1112 | conserved hypothetical protein                                             | 100 | 99  | 100 | 92 |
| BMAA1115 | ompA family protein                                                        | 100 | 100 | 100 | 96 |
| BMAA1122 | porin OpcP1, putative                                                      | 100 | 99  | 100 | 99 |
| BMAA1123 | ISBma1, transposase                                                        | 100 | 99  | 100 | 98 |
| BMAA1125 | MOSC domain protein                                                        | 100 | 100 | 99  | 93 |
| BMAA1126 | sensor histidine kinase                                                    | 100 | 99  | 100 | 90 |
| BMAA1127 | DNA-binding response regulator TctD                                        | 100 | 99  | 100 | 98 |

|            |                                                                    |     |     |     |    |
|------------|--------------------------------------------------------------------|-----|-----|-----|----|
| BMAA1128   | ABC transporter, periplasmic substrate-binding protein             | 100 | 100 | 100 | 95 |
| BMAA1130   | ABC transporter, ATP-binding protein                               | 100 | 100 | 100 | 96 |
| BMAA1131   | porin                                                              | 100 | 99  | 100 | 94 |
| BMAA1135   | 2-oxo-hepta-3-ene-1,7-dioate hydratase                             | 100 | 100 | 100 | 97 |
| BMAA1136   | 5-carboxymethyl-2-hydroxymuconate delta isomerase                  | 100 | 100 | 100 | 96 |
| BMAA1137   | 3,4-dihydroxyphenylacetate 2,3-dioxygenase                         | 100 | 100 | 100 | 98 |
| BMAA1138   | 5-carboxy-2-hydroxymuconate semialdehyde dehydrogenase             | 100 | 99  | 100 | 96 |
| BMAA1139   | 5-carboxymethyl-2-oxo-hex-3-ene-1,7-dioate decarboxylase, putative | 100 | 100 | 100 | 97 |
| BMAA1140   | 2-hydroxyhepta-2,4-diene-1,7-dioate isomerase, putative            | 100 | 99  | 100 | 93 |
| BMAA1141   | homoprotocatechuate degradative operon repressor                   | 100 | 99  | 100 | 97 |
| BMAA1142   | conserved hypothetical protein                                     | 100 | 99  | 100 | 91 |
| BMAA1143   | conserved hypothetical protein                                     | 100 | 99  | 100 | 86 |
| BMAA1144   | DNA-binding response regulator                                     | 100 | 98  | 100 | 95 |
| BMAA1145   | sensor histidine kinase                                            | 100 | 99  | 100 | 92 |
| BMAA1146   | monooxygenase                                                      | 100 | 100 | 99  | 95 |
| BMAA1148   | acyl-CoA dehydrogenase domain protein                              | 100 | 99  | 100 | 93 |
| BMAA1150   | hypothetical protein                                               | 100 | 100 | 100 | 92 |
| BMAA1153   | transcriptional regulator, AraC family                             | 100 | 100 | 100 | 93 |
| BMAA1154   | isoquinoline 1-oxidoreductase, alpha subunit                       | 100 | 99  | 100 | 98 |
| BMAA1154.1 | isoquinoline 1-oxidoreductase, beta subunit                        | 100 | 99  | 100 | 93 |
| BMAA1158   | asparagine synthase (glutamine-hydrolyzing)                        | 100 | 99  | 100 | 96 |
| BMAA1159   | conserved hypothetical protein                                     | 100 | 100 | 100 | 94 |
| BMAA1161   | transcriptional regulator, LuxR family                             | 100 | 100 | 100 | 94 |
| BMAA1166   | trehalase                                                          | 100 | 99  | 100 | 94 |
| BMAA1168   | drug resistance transporter, EmrB/QacA family                      | 100 | 99  | 100 | 97 |
| BMAA1169   | conserved hypothetical protein                                     | 100 | 99  | 99  | 94 |
| BMAA1170   | conserved hypothetical protein                                     | 100 | 100 | 100 | 95 |
| BMAA1180   | TonB-dependent siderophore receptor                                | 100 | 99  | 100 | 93 |
| BMAA1181   | FecR family protein                                                | 97  | 97  | 95  | 86 |
| BMAA1182   | RNA polymerase sigma-70 factor, ECF family                         | 100 | 99  | 100 | 94 |
| BMAA1187   | RNA polymerase sigma-70 factor, ECF subfamily                      | 100 | 99  | 100 | 91 |
| BMAA1190   | fumarylacetoacetate hydrolase family protein                       | 100 | 100 | 100 | 95 |
| BMAA1191   | CAAX protease family protein                                       | 100 | 100 | 100 | 95 |
| BMAA1193   | conserved hypothetical protein TIGR00427                           | 100 | 96  | 97  | 93 |
| BMAA1195   | calcium/proton exchanger                                           | 100 | 99  | 100 | 96 |
| BMAA1196   | transcriptional regulator, LysR family                             | 100 | 100 | 100 | 98 |
| BMAA1197   | HPP family protein                                                 | 100 | 99  | 100 | 93 |
| BMAA1198   | conserved hypothetical protein                                     | 100 | 99  | 100 | 95 |
| BMAA1199   | voltage-gated chloride channel/CBS domain protein                  | 100 | 99  | 100 | 90 |
| BMAA1213   | ISBma1, transposase                                                | 100 | 99  | 100 | 98 |
| BMAA1232   | hypothetical protein                                               | 100 | 97  | 100 | 91 |
| BMAA1233   | hypothetical protein                                               | 100 | 97  | 100 | 91 |
| BMAA1236   | conserved hypothetical protein                                     | 100 | 98  | 100 | 91 |
| BMAA1237   | UDP-N-acetylglucosamine 1-carboxyvinyltransferase, putative        | 100 | 100 | 100 | 98 |
| BMAA1238   | histidine ABC transporter, ATP-binding protein                     | 100 | 99  | 100 | 93 |
| BMAA1239   | histidine ABC transporter, permease protein                        | 100 | 99  | 100 | 97 |
| BMAA1240   | histidine ABC transporter, permease protein                        | 100 | 100 | 100 | 95 |
| BMAA1241   | membrane protein, putative                                         | 100 | 100 | 100 | 93 |
| BMAA1242   | outer membrane porin, putative                                     | 100 | 99  | 100 | 96 |

|          |                                                                           |     |     |     |    |
|----------|---------------------------------------------------------------------------|-----|-----|-----|----|
| BMAA1243 | DoxD-like family protein                                                  | 100 | 98  | 98  | 90 |
| BMAA1244 | cytochrome c family protein                                               | 100 | 98  | 100 | 90 |
| BMAA1245 | conserved hypothetical protein                                            | 100 | 100 | 100 | 96 |
| BMAA1246 | oxidoreductase, putative                                                  | 100 | 99  | 100 | 93 |
| BMAA1248 | serine metalloprotease MrpA                                               | 100 | 99  | 100 | 92 |
| BMAA1250 | magnesium-translocating P-type ATPase                                     | 100 | 99  | 100 | 94 |
| BMAA1251 | conserved hypothetical protein                                            | 100 | 100 | 100 | 90 |
| BMAA1253 | transcriptional regulator, GntR family                                    | 100 | 99  | 100 | 96 |
| BMAA1254 | molybdopterin oxidoreductase, alpha subunit                               | 100 | 99  | 100 | 93 |
| BMAA1255 | conserved hypothetical protein                                            | 100 | 100 | 100 | 94 |
| BMAA1258 | manganese/iron transporter, NRAMP family                                  | 100 | 99  | 100 | 93 |
| BMAA1259 | cupin family protein                                                      | 100 | 99  | 100 | 96 |
| BMAA1261 | bacterial extracellular solute-binding protein, family 5                  | 100 | 99  | 100 | 94 |
| BMAA1262 | hypothetical protein                                                      | 100 | 100 | 100 | 88 |
| BMAA1263 | serine protease, subtilase family                                         | 100 | 99  | 100 | 91 |
| BMAA1265 | hypothetical protein                                                      | 100 | 99  | 99  | 86 |
| BMAA1267 | hypothetical protein                                                      | 100 | 100 | 100 | 87 |
| BMAA1268 | conserved hypothetical protein                                            | 100 | 98  | 100 | 97 |
| BMAA1269 | Rhs element Vgr protein                                                   | 100 | 100 | 100 | 97 |
| BMAA1272 | conserved hypothetical protein                                            | 100 | 100 | 100 | 93 |
| BMAA1273 | D-alanyl-D-alanine dipeptidase                                            | 100 | 98  | 100 | 88 |
| BMAA1274 | ABC transporter, periplasmic substrate-binding protein                    | 100 | 100 | 100 | 93 |
| BMAA1275 | ABC transporter, permease protein                                         | 100 | 99  | 100 | 95 |
| BMAA1276 | ABC transporter, permease protein                                         | 100 | 99  | 100 | 94 |
| BMAA1277 | ABC transporter, ATP-binding protein                                      | 100 | 98  | 100 | 91 |
| BMAA1278 | ABC transporter, ATP-binding protein                                      | 100 | 99  | 100 | 92 |
| BMAA1281 | transcriptional regulator, LysR family                                    | 100 | 99  | 100 | 89 |
| BMAA1283 | class A beta-lactamase                                                    | 100 | 100 | 100 | 89 |
| BMAA1285 | transcriptional regulator, LysR family                                    | 100 | 100 | 100 | 98 |
| BMAA1286 | outer membrane porin, putative                                            | 100 | 100 | 100 | 97 |
| BMAA1288 | opgC protein, putative                                                    | 100 | 99  | 100 | 92 |
| BMAA1289 | esterase, putative                                                        | 100 | 98  | 100 | 94 |
| BMAA1290 | ornithine cyclodeaminase/mu-crystallin family protein                     | 100 | 99  | 100 | 86 |
| BMAA1291 | 4-carboxymuconolactone decarboxylase                                      | 100 | 98  | 100 | 92 |
| BMAA1292 | hydrolase, alpha/beta fold family                                         | 100 | 100 | 98  | 91 |
| BMAA1293 | TrkA domain protein                                                       | 100 | 99  | 100 | 98 |
| BMAA1294 | conserved hypothetical protein                                            | 100 | 99  | 100 | 94 |
| BMAA1295 | conserved hypothetical protein                                            | 100 | 99  | 100 | 97 |
| BMAA1297 | hypothetical protein                                                      | 100 | 97  | 100 | 97 |
| BMAA1299 | drug resistance transporter, EmrB/QacA family                             | 100 | 98  | 100 | 97 |
| BMAA1302 | transcriptional regulator, MerR family                                    | 100 | 100 | 100 | 98 |
| BMAA1303 | aliphatic compound ABC transporter, periplasmic substrate-binding protein | 100 | 99  | 100 | 88 |
| BMAA1305 | membrane protein, putative                                                | 100 | 100 | 100 | 91 |
| BMAA1311 | conserved hypothetical protein                                            | 100 | 98  | 100 | 90 |
| BMAA1313 | N-hydroxyarylamine O-acetyltransferase                                    | 100 | 99  | 99  | 91 |
| BMAA1317 | trans-sulfuration enzyme family protein                                   | 100 | 100 | 100 | 96 |
| BMAA1319 | transcriptional regulator, AsnC family                                    | 100 | 100 | 99  | 98 |
| BMAA1320 | amidase family protein                                                    | 100 | 99  | 100 | 91 |
| BMAA1322 | UspA family protein                                                       | 100 | 100 | 100 | 95 |

|          |                                                                      |     |     |     |    |
|----------|----------------------------------------------------------------------|-----|-----|-----|----|
| BMAA1323 | outer membrane lipoprotein, OmpA/SmpA/OmlA family                    | 100 | 100 | 100 | 91 |
| BMAA1324 | haemagglutinin family protein                                        | 100 | 99  | 100 | 93 |
| BMAA1325 | major facilitator family transporter                                 | 100 | 99  | 100 | 94 |
| BMAA1326 | pyridine nucleotide-disulfide oxidoreductase, class I                | 100 | 99  | 100 | 90 |
| BMAA1327 | glyoxalase family protein                                            | 100 | 99  | 100 | 93 |
| BMAA1328 | aldehyde dehydrogenase family protein                                | 100 | 99  | 100 | 96 |
| BMAA1329 | conserved hypothetical protein                                       | 100 | 99  | 100 | 94 |
| BMAA1330 | acetolactate synthase, large subunit, putative                       | 100 | 98  | 100 | 96 |
| BMAA1331 | oxidoreductase, short chain dehydrogenase/reductase family           | 100 | 99  | 100 | 94 |
| BMAA1332 | transcriptional regulator, lclR family                               | 100 | 100 | 100 | 96 |
| BMAA1333 | hydrolase, alpha/beta fold family                                    | 100 | 99  | 99  | 88 |
| BMAA1334 | conserved hypothetical protein                                       | 100 | 99  | 100 | 98 |
| BMAA1335 | oxidoreductase, short chain dehydrogenase/reductase family           | 100 | 99  | 100 | 93 |
| BMAA1336 | iron-sulfur cluster-binding protein, rieske family                   | 100 | 99  | 100 | 97 |
| BMAA1337 | conserved hypothetical protein                                       | 100 | 98  | 99  | 95 |
| BMAA1338 | naphthalene 1,2-dioxygenase system ferredoxin component              | 100 | 100 | 100 | 99 |
| BMAA1339 | outer membrane porin OpcP, putative                                  | 100 | 99  | 100 | 94 |
| BMAA1340 | transcriptional regulator, lclR family                               | 100 | 99  | 100 | 94 |
| BMAA1341 | oxidoreductase, 2OG-Fe(II) oxygenase family                          | 100 | 98  | 100 | 91 |
| BMAA1342 | nitroreductase family protein                                        | 100 | 100 | 100 | 96 |
| BMAA1343 | Ser/Thr protein phosphatase family protein                           | 100 | 99  | 100 | 92 |
| BMAA1344 | MgtC family protein                                                  | 100 | 100 | 100 | 99 |
| BMAA1345 | N-acyl homoserine lactone transcriptional regulator                  | 100 | 100 | 100 | 98 |
| BMAA1346 | hypothetical protein                                                 | 100 | 98  | 100 | 91 |
| BMAA1347 | autoinducer synthetase family protein                                | 100 | 99  | 100 | 96 |
| BMAA1348 | conserved domain protein                                             | 100 | 99  | 100 | 90 |
| BMAA1349 | GTP cyclohydrolase II                                                | 100 | 99  | 100 | 98 |
| BMAA1350 | CBS domain protein                                                   | 100 | 100 | 99  | 98 |
| BMAA1351 | hypothetical protein                                                 | 100 | 100 | 100 | 90 |
| BMAA1352 | nucleoside diphosphate kinase regulator, putative                    | 100 | 100 | 100 | 91 |
| BMAA1353 | outer membrane porin OpcP                                            | 100 | 98  | 100 | 99 |
| BMAA1355 | transcriptional regulator, ArsR family                               | 100 | 100 | 100 | 97 |
| BMAA1356 | N-ethylmaleimide reductase                                           | 100 | 100 | 100 | 93 |
| BMAA1360 | outer membrane porin, putative                                       | 100 | 99  | 100 | 88 |
| BMAA1361 | transcriptional regulator, araC family                               | 100 | 100 | 100 | 95 |
| BMAA1363 | amino acid permease                                                  | 100 | 99  | 100 | 94 |
| BMAA1364 | adenosylmethionine-8-amino-7-oxononanoate aminotransferase, putative | 100 | 99  | 100 | 98 |
| BMAA1365 | phenylacetaldehyde dehydrogenase                                     | 100 | 99  | 100 | 95 |
| BMAA1366 | transcriptional regulator, LuxR family                               | 100 | 99  | 100 | 92 |
| BMAA1367 | oxidoreductase, short chain dehydrogenase/reductase family           | 100 | 100 | 100 | 92 |
| BMAA1368 | conserved hypothetical protein                                       | 100 | 99  | 100 | 88 |
| BMAA1370 | oxidoreductase, aldo/keto reductase family                           | 100 | 99  | 100 | 94 |
| BMAA1372 | conserved hypothetical protein                                       | 100 | 100 | 100 | 88 |
| BMAA1373 | transcriptional regulator, LysR family                               | 100 | 98  | 100 | 94 |
| BMAA1374 | flagellar hook-associated protein 2                                  | 100 | 99  | 100 | 93 |
| BMAA1376 | DNA repair helicase, truncation                                      | 100 | 98  | 100 | 93 |
| BMAA1379 | methylmalonate-semialdehyde dehydrogenase                            | 100 | 99  | 100 | 91 |
| BMAA1380 | omega-amino acid--pyruvate aminotransferase                          | 100 | 99  | 100 | 96 |
| BMAA1381 | transcriptional regulator, LysR family                               | 100 | 100 | 100 | 97 |



|          |                                                                      |     |     |     |    |
|----------|----------------------------------------------------------------------|-----|-----|-----|----|
| BMAA1384 | hypothetical protein                                                 | 100 | 98  | 100 | 93 |
| BMAA1385 | 2,4'-dihydroxyacetophenone dioxygenase                               | 100 | 100 | 100 | 95 |
| BMAA1394 | AMP-binding domain protein                                           | 100 | 99  | 100 | 96 |
| BMAA1397 | conserved hypothetical protein                                       | 100 | 100 | 100 | 91 |
| BMAA1398 | transcriptional regulator, GntR family                               | 100 | 99  | 100 | 93 |
| BMAA1399 | D-beta-hydroxybutyrate dehydrogenase                                 | 100 | 99  | 100 | 94 |
| BMAA1400 | osmotically-inducible lipoprotein OsmE                               | 100 | 99  | 100 | 89 |
| BMAA1401 | membrane protein, putative                                           | 100 | 99  | 100 | 91 |
| BMAA1403 | enoyl-(acyl-carrier-protein) reductase                               | 100 | 100 | 100 | 97 |
| BMAA1405 | xenobiotic reductase A                                               | 100 | 99  | 100 | 95 |
| BMAA1406 | DJ-1/Pfpl family protein                                             | 100 | 100 | 100 | 96 |
| BMAA1408 | transcriptional regulator, TetR family                               | 100 | 100 | 100 | 93 |
| BMAA1414 | hypothetical protein                                                 | 100 | 97  | 100 | 94 |
| BMAA1415 | transcriptional regulator, AraC family                               | 100 | 99  | 98  | 87 |
| BMAA1416 | oxidoreductase, putative                                             | 100 | 99  | 100 | 92 |
| BMAA1417 | 2Fe-2S iron-sulfur cluster binding domain                            | 100 | 97  | 100 | 90 |
| BMAA1418 | oxidoreductase, FAD-binding family protein                           | 100 | 98  | 99  | 91 |
| BMAA1419 | proline racemase, putative                                           | 100 | 99  | 100 | 92 |
| BMAA1420 | dihydrodipicolinate synthetase family protein                        | 100 | 99  | 100 | 97 |
| BMAA1422 | aldehyde dehydrogenase family protein                                | 100 | 99  | 100 | 92 |
| BMAA1423 | malate/L-lactate dehydrogenase family protein                        | 100 | 99  | 100 | 93 |
| BMAA1424 | major facilitator family transporter                                 | 100 | 99  | 100 | 97 |
| BMAA1426 | DoxD-like family protein                                             | 100 | 100 | 100 | 91 |
| BMAA1428 | lactate permease family protein                                      | 100 | 99  | 100 | 97 |
| BMAA1429 | conserved hypothetical protein                                       | 100 | 99  | 100 | 88 |
| BMAA1430 | iron-sulfur cluster binding protein                                  | 100 | 99  | 100 | 96 |
| BMAA1431 | cysteine-rich domain protein                                         | 100 | 99  | 100 | 95 |
| BMAA1432 | transcriptional regulator, GntR family                               | 100 | 100 | 100 | 96 |
| BMAA1435 | hypothetical protein                                                 | 100 | 100 | 100 | 92 |
| BMAA1436 | monooxygenase                                                        | 100 | 97  | 100 | 92 |
| BMAA1440 | monooxygenase                                                        | 100 | 99  | 100 | 90 |
| BMAA1443 | autoinducer-binding transcriptional regulator, LuxR family           | 100 | 100 | 100 | 97 |
| BMAA1447 | conserved domain protein                                             | 100 | 100 | 100 | 97 |
| BMAA1449 | syringomycin synthesis regulator SyrP, putative                      | 100 | 99  | 100 | 95 |
| BMAA1450 | adenosylmethionine-8-amino-7-oxononanoate aminotransferase, putative | 100 | 99  | 100 | 95 |
| BMAA1451 | aldehyde dehydrogenase family protein                                | 100 | 98  | 100 | 95 |
| BMAA1455 | diaminopimelate decarboxylase, putative                              | 100 | 99  | 100 | 92 |
| BMAA1456 | long-chain-fatty-acid--CoA ligase, putative                          | 100 | 99  | 100 | 89 |
| BMAA1457 | lipoprotein, putative                                                | 100 | 100 | 100 | 95 |
| BMAA1458 | malonyl CoA-acyl carrier protein transacylase                        | 100 | 100 | 99  | 86 |
| BMAA1459 | AMP-binding domain protein                                           | 100 | 99  | 100 | 89 |
| BMAA1460 | auxin efflux carrier, putative                                       | 100 | 99  | 100 | 93 |
| BMAA1462 | transcriptional regulator, GntR family                               | 100 | 99  | 100 | 99 |
| BMAA1463 | sodium:dicarboxylate symporter family protein                        | 100 | 99  | 100 | 97 |
| BMAA1464 | RND efflux system, outer membrane lipoprotein, NodT family           | 100 | 99  | 100 | 97 |
| BMAA1465 | hydrophobe/amphiphile efflux family protein                          | 100 | 100 | 100 | 99 |
| BMAA1466 | efflux transporter, RND family, MFP subunit                          | 100 | 100 | 100 | 96 |
| BMAA1467 | carboxylesterase, putative                                           | 100 | 99  | 100 | 93 |
| BMAA1468 | transcriptional regulator, LysR family                               | 100 | 100 | 100 | 97 |

|            |                                                                    |     |     |     |     |
|------------|--------------------------------------------------------------------|-----|-----|-----|-----|
| BMAA1471   | lipoprotein, putative                                              | 100 | 100 | 100 | 94  |
| BMAA1473   | selenide, water dikinase                                           | 100 | 99  | 100 | 94  |
| BMAA1474   | membrane protein, putative                                         | 100 | 99  | 100 | 89  |
| BMAA1480   | 4-aminobutyrate aminotransferase                                   | 100 | 99  | 100 | 97  |
| BMAA1481   | succinate-semialdehyde dehydrogenase                               | 100 | 99  | 100 | 98  |
| BMAA1482   | hypothetical protein                                               | 100 | 99  | 100 | 98  |
| BMAA1484   | conserved hypothetical protein, authentic frameshift               | 100 | 97  | 100 | 91  |
| BMAA1487   | methyl-accepting chemotaxis protein                                | 100 | 99  | 100 | 94  |
| BMAA1491   | transcriptional regulator, lclR family                             | 100 | 99  | 100 | 96  |
| BMAA1492   | transcriptional regulator, TetR family                             | 100 | 99  | 98  | 97  |
| BMAA1496   | amino acid ABC transporter, periplasmic amino acid-binding protein | 100 | 99  | 100 | 97  |
| BMAA1499   | conserved hypothetical protein                                     | 100 | 100 | 100 | 96  |
| BMAA1501   | D-methionine-binding lipoprotein metQ                              | 100 | 100 | 100 | 91  |
| BMAA1502   | porin, interruption-N                                              | 100 | 98  | 100 | 96  |
| BMAA1505   | porin, interruption-C                                              | 100 | 99  | 100 | 96  |
| BMAA1508   | transcriptional regulator, LysR family                             | 100 | 99  | 100 | 94  |
| BMAA1509   | pirin family protein                                               | 100 | 100 | 100 | 91  |
| BMAA1510   | conserved hypothetical protein                                     | 100 | 99  | 100 | 92  |
| BMAA1511   | conserved hypothetical protein                                     | 100 | 97  | 100 | 89  |
| BMAA1517   | transcriptional regulator, araC family                             | 100 | 99  | 95  | 89  |
| BMAA1518   | hypothetical protein                                               | 100 | 100 | 100 | 91  |
| BMAA1518.1 | DNA-binding response regulator                                     | 100 | 100 | 100 | 95  |
| BMAA1520   | type III secretion chaperone BicP                                  | 100 | 100 | 100 | 93  |
| BMAA1521   | BopA protein                                                       | 100 | 99  | 100 | 90  |
| BMAA1523   | type III secretion target BopE                                     | 100 | 99  | 100 | 95  |
| BMAA1524   | BapC protein                                                       | 100 | 100 | 100 | 90  |
| BMAA1525   | BapB protein                                                       | 100 | 98  | 100 | 93  |
| BMAA1528   | BprD protein                                                       | 100 | 100 | 100 | 91  |
| BMAA1529   | DNA-binding protein BprA                                           | 100 | 100 | 100 | 91  |
| BMAA1530   | type III secretion target BipC                                     | 100 | 100 | 100 | 86  |
| BMAA1531   | BipB protein                                                       | 100 | 100 | 100 | 90  |
| BMAA1532   | type III secretion chaperone BicA                                  | 100 | 100 | 100 | 94  |
| BMAA1534   | type III secretion system protein BsaY                             | 100 | 99  | 99  | 92  |
| BMAA1535   | type III secretion system protein BsaX                             | 100 | 100 | 100 | 100 |
| BMAA1536   | type III secretion system protein BsaW                             | 100 | 100 | 100 | 95  |
| BMAA1537   | type III secretion system protein BsaV                             | 100 | 97  | 100 | 86  |
| BMAA1539   | BsaT protein                                                       | 100 | 99  | 99  | 86  |
| BMAA1540   | type III secretion system protein BsaS                             | 100 | 99  | 100 | 94  |
| BMAA1541   | type III secretion system protein BsaR                             | 100 | 100 | 100 | 97  |
| BMAA1542   | type III secretion system protein BsaQ                             | 100 | 100 | 100 | 97  |
| BMAA1543   | type III secretion system protein BsaP                             | 100 | 98  | 100 | 93  |
| BMAA1544   | type III secretion system protein BsaO                             | 100 | 98  | 100 | 94  |
| BMAA1545   | type III secretion system transcriptional regulator BsaN           | 100 | 99  | 100 | 97  |
| BMAA1547   | type III secretion system protein BsaM                             | 100 | 99  | 100 | 92  |
| BMAA1548   | type III secretion system protein BsaL                             | 100 | 98  | 100 | 97  |
| BMAA1549   | type III secretion system protein BsaK                             | 100 | 99  | 100 | 90  |
| BMAA1550   | type III secretion system BasJ                                     | 100 | 99  | 100 | 93  |
| BMAA1551   | oxygen-regulated invasion protein OrgA                             | 100 | 99  | 100 | 92  |
| BMAA1557   | hypothetical protein                                               | 100 | 99  | 100 | 94  |

|          |                                                              |     |     |     |    |
|----------|--------------------------------------------------------------|-----|-----|-----|----|
| BMAA1559 | thermolysin metallopeptidase                                 | 100 | 99  | 100 | 95 |
| BMAA1563 | metabolite:proton symporter family protein                   | 100 | 99  | 100 | 95 |
| BMAA1564 | transcriptional regulator, LysR family                       | 100 | 100 | 100 | 95 |
| BMAA1565 | dehydrogenase, FMN-dependent family                          | 100 | 100 | 100 | 92 |
| BMAA1566 | serine-type carboxypeptidase family protein                  | 100 | 100 | 100 | 94 |
| BMAA1569 | LysE family protein                                          | 100 | 97  | 100 | 90 |
| BMAA1570 | transcriptional regulator, AsnC family                       | 100 | 100 | 100 | 94 |
| BMAA1572 | phosphate transporter family protein                         | 100 | 99  | 100 | 94 |
| BMAA1573 | conserved hypothetical protein                               | 100 | 99  | 100 | 89 |
| BMAA1576 | transcriptional regulator, LuxR family                       | 100 | 100 | 100 | 96 |
| BMAA1577 | N-acyl homoserine lactone synthase                           | 100 | 99  | 100 | 91 |
| BMAA1578 | oxidoreductase, FAD/FMN-binding                              | 100 | 99  | 100 | 94 |
| BMAA1580 | taurine ABC transporter, permease protein                    | 100 | 99  | 100 | 92 |
| BMAA1581 | taurine ABC transporter, ATP-binding protein                 | 100 | 98  | 100 | 96 |
| BMAA1582 | taurine ABC transporter, periplasmic taurine-binding protein | 100 | 99  | 100 | 92 |
| BMAA1583 | taurine dioxygenase-related protein                          | 98  | 97  | 96  | 91 |
| BMAA1584 | conserved hypothetical protein                               | 100 | 99  | 100 | 93 |
| BMAA1585 | glycosyl transferase, group 2 family protein                 | 100 | 99  | 100 | 92 |
| BMAA1588 | cellulose synthase operon protein C                          | 100 | 98  | 100 | 88 |
| BMAA1590 | cellulose synthase, cyclic di-GMP binding subunit            | 100 | 99  | 99  | 89 |
| BMAA1596 | transcriptional regulator, LysR family                       | 100 | 100 | 100 | 90 |
| BMAA1597 | agmatinase                                                   | 100 | 100 | 100 | 95 |
| BMAA1600 | conserved hypothetical protein                               | 100 | 99  | 100 | 92 |
| BMAA1602 | type II/III secretion system protein                         | 100 | 99  | 100 | 93 |
| BMAA1604 | PilM, putative                                               | 100 | 100 | 100 | 86 |
| BMAA1606 | type IV pilus biogenesis protein                             | 100 | 100 | 100 | 95 |
| BMAA1607 | type II/IV secretion system protein                          | 100 | 99  | 100 | 94 |
| BMAA1608 | hypothetical protein                                         | 100 | 100 | 100 | 93 |
| BMAA1609 | PilO, putative                                               | 100 | 100 | 100 | 92 |
| BMAA1610 | type IV pilus biogenesis protein PilN, putative              | 100 | 99  | 97  | 90 |
| BMAA1614 | DNA-binding response regulator                               | 100 | 100 | 100 | 96 |
| BMAA1615 | sensor histidine kinase                                      | 100 | 99  | 100 | 90 |
| BMAA1621 | regulatory protein HrpB                                      | 100 | 99  | 100 | 90 |
| BMAA1622 | conserved hypothetical protein                               | 100 | 99  | 100 | 86 |
| BMAA1624 | conserved hypothetical protein                               | 100 | 100 | 100 | 91 |
| BMAA1627 | type III secretion inner membrane protein SctS               | 100 | 100 | 100 | 95 |
| BMAA1628 | type III secretion inner membrane protein SctR               | 100 | 100 | 100 | 97 |
| BMAA1630 | type III secretion inner membrane protein SctV               | 100 | 99  | 100 | 96 |
| BMAA1631 | type III secretion inner membrane protein                    | 100 | 99  | 100 | 89 |
| BMAA1636 | type III secretion inner membrane protein SctL               | 100 | 100 | 100 | 94 |
| BMAA1637 | type III secretion cytoplasmic ATPase SctN                   | 100 | 99  | 100 | 98 |
| BMAA1657 | transcriptional regulator, LysR family                       | 100 | 100 | 100 | 93 |
| BMAA1658 | drug resistance transporter, EmrB/QacA family                | 100 | 98  | 100 | 88 |
| BMAA1660 | sensory box sensor histidine kinase                          | 100 | 99  | 100 | 94 |
| BMAA1661 | conserved hypothetical protein                               | 100 | 99  | 99  | 95 |
| BMAA1662 | response regulator                                           | 100 | 99  | 99  | 86 |
| BMAA1664 | lectin repeat domain protein                                 | 100 | 99  | 100 | 91 |
| BMAA1666 | conserved domain protein                                     | 100 | 99  | 100 | 87 |
| BMAA1667 | patatin-like phospholipase                                   | 100 | 99  | 100 | 88 |

|            |                                                                                           |     |     |     |    |
|------------|-------------------------------------------------------------------------------------------|-----|-----|-----|----|
| BMAA1669   | cytochrome P450                                                                           | 100 | 99  | 100 | 92 |
| BMAA1678   | selenocysteine-specific translation elongation factor                                     | 100 | 99  | 100 | 92 |
| BMAA1678.1 | L-seryl-tRNA selenium transferase                                                         | 100 | 99  | 100 | 91 |
| BMAA1680   | formate dehydrogenase accessory protein                                                   | 100 | 99  | 100 | 94 |
| BMAA1681   | formate dehydrogenase, gamma subunit                                                      | 100 | 99  | 100 | 97 |
| BMAA1682   | formate dehydrogenase, beta subunit                                                       | 100 | 99  | 100 | 98 |
| BMAA1683   | formate dehydrogenase, alpha subunit, selenocysteine-containing, authentic point mutation | 100 | 99  | 100 | 96 |
| BMAA1685   | conserved hypothetical protein                                                            | 100 | 100 | 100 | 88 |
| BMAA1696   | conserved hypothetical protein                                                            | 100 | 100 | 100 | 93 |
| BMAA1697   | ribonuclease BN, putative                                                                 | 100 | 99  | 100 | 94 |
| BMAA1700   | DNA-binding protein BpH2                                                                  | 100 | 100 | 100 | 98 |
| BMAA1701   | acyltransferase family protein                                                            | 100 | 99  | 100 | 88 |
| BMAA1705   | glycosyl transferase, group 1 family protein                                              | 100 | 99  | 100 | 95 |
| BMAA1706   | polysaccharide biosynthesis family protein                                                | 100 | 99  | 100 | 96 |
| BMAA1708   | acyltransferase family protein                                                            | 100 | 100 | 100 | 96 |
| BMAA1709   | GDP-mannose 4,6-dehydratase                                                               | 100 | 99  | 100 | 95 |
| BMAA1711   | conserved hypothetical protein                                                            | 100 | 99  | 100 | 94 |
| BMAA1713   | O-succinylhomoserine sulfhydrylase                                                        | 100 | 99  | 100 | 97 |
| BMAA1714   | amidophosphoribosyltransferase                                                            | 100 | 99  | 100 | 98 |
| BMAA1715   | CvpA family protein                                                                       | 100 | 100 | 100 | 96 |
| BMAA1717   | folylpolyglutamate synthase/dihydrofolate synthase                                        | 100 | 99  | 100 | 95 |
| BMAA1718   | acetyl-CoA carboxylase, carboxyl transferase, beta subunit                                | 100 | 100 | 100 | 98 |
| BMAA1719   | tryptophan synthase, alpha subunit                                                        | 100 | 99  | 100 | 93 |
| BMAA1720   | N-6 adenine-specific DNA methylase                                                        | 100 | 100 | 100 | 95 |
| BMAA1721   | tryptophan synthase, beta subunit                                                         | 100 | 99  | 99  | 96 |
| BMAA1722   | N-(5'phosphoribosyl)anthranilate isomerase                                                | 100 | 99  | 100 | 89 |
| BMAA1723   | tRNA pseudouridine synthase A                                                             | 100 | 100 | 100 | 97 |
| BMAA1725   | aspartate-semialdehyde dehydrogenase                                                      | 100 | 100 | 100 | 98 |
| BMAA1726   | 3-isopropylmalate dehydrogenase                                                           | 100 | 100 | 100 | 98 |
| BMAA1727   | 3-isopropylmalate dehydratase, small subunit                                              | 100 | 100 | 100 | 97 |
| BMAA1728   | entericidin                                                                               | 100 | 97  | 100 | 91 |
| BMAA1729   | 3-isopropylmalate dehydratase, large subunit                                              | 100 | 99  | 100 | 98 |
| BMAA1736   | Bkd operon transcriptional regulator                                                      | 100 | 100 | 100 | 96 |
| BMAA1737   | 2-oxo-acid dehydrogenase E1 component                                                     | 100 | 99  | 100 | 94 |
| BMAA1738   | dioxygenase, putative                                                                     | 100 | 99  | 99  | 92 |
| BMAA1739   | conserved domain protein                                                                  | 100 | 100 | 98  | 86 |
| BMAA1743   | transcriptional regulator, AraC family                                                    | 100 | 99  | 100 | 90 |
| BMAA1744   | citrate synthase I                                                                        | 100 | 100 | 100 | 99 |
| BMAA1745   | conserved hypothetical protein                                                            | 100 | 98  | 100 | 98 |
| BMAA1746   | succinate dehydrogenase, iron-sulfur protein                                              | 100 | 100 | 100 | 99 |
| BMAA1747   | succinate dehydrogenase, flavoprotein subunit                                             | 100 | 99  | 100 | 99 |
| BMAA1748   | succinate dehydrogenase, hydrophobic membrane anchor protein                              | 100 | 100 | 100 | 98 |
| BMAA1749   | succinate dehydrogenase, cytochrome b556 subunit                                          | 100 | 100 | 100 | 98 |
| BMAA1750   | transcriptional regulator, GntR family                                                    | 100 | 100 | 100 | 97 |
| BMAA1751   | malate dehydrogenase                                                                      | 100 | 100 | 100 | 99 |
| BMAA1752   | lyase, putative                                                                           | 100 | 99  | 100 | 94 |
| BMAA1753   | conserved hypothetical protein                                                            | 100 | 99  | 100 | 95 |
| BMAA1754   | 2-methylcitrate dehydratase                                                               | 100 | 99  | 100 | 95 |
| BMAA1755   | aconitate hydratase 1                                                                     | 100 | 100 | 100 | 98 |

|            |                                                          |     |     |     |    |
|------------|----------------------------------------------------------|-----|-----|-----|----|
| BMAA1761   | conserved hypothetical protein                           | 100 | 99  | 100 | 86 |
| BMAA1763   | coenzyme A transferase                                   | 100 | 100 | 100 | 99 |
| BMAA1764   | CDP-alcohol phosphatidyltransferase family protein       | 100 | 100 | 100 | 94 |
| BMAA1766   | membrane protein, putative                               | 100 | 100 | 100 | 95 |
| BMAA1767   | conserved hypothetical protein                           | 100 | 99  | 100 | 98 |
| BMAA1768   | phosphoenolpyruvate phosphomutase                        | 100 | 99  | 100 | 96 |
| BMAA1769   | 3-phosphonopyruvate decarboxylase                        | 100 | 99  | 100 | 95 |
| BMAA1770   | 2-aminoethylphosphonate-pyruvate transaminase            | 100 | 99  | 100 | 96 |
| BMAA1773   | membrane protein, putative                               | 100 | 100 | 100 | 92 |
| BMAA1775   | transcriptional regulator, GntR family                   | 100 | 99  | 100 | 86 |
| BMAA1776   | transglutaminase domain protein                          | 100 | 98  | 100 | 91 |
| BMAA1777   | conserved hypothetical protein                           | 100 | 99  | 100 | 96 |
| BMAA1778   | transglutaminase domain protein                          | 100 | 99  | 100 | 93 |
| BMAA1779   | conserved hypothetical protein                           | 100 | 99  | 100 | 88 |
| BMAA1780   | conserved hypothetical protein                           | 100 | 99  | 100 | 97 |
| BMAA1781   | conserved hypothetical protein                           | 100 | 100 | 100 | 99 |
| BMAA1785   | chitin binding domain protein                            | 100 | 100 | 100 | 95 |
| BMAA1786   | alkyl hydroperoxide reductase, subunit c                 | 100 | 99  | 100 | 98 |
| BMAA1792   | sodium:solute symporter family protein                   | 100 | 99  | 100 | 96 |
| BMAA1793   | conserved hypothetical protein                           | 100 | 99  | 100 | 89 |
| BMAA1794   | acetyl-coenzyme A synthetase                             | 100 | 100 | 100 | 98 |
| BMAA1796   | conserved hypothetical protein TIGR00645                 | 100 | 99  | 100 | 98 |
| BMAA1797   | hydro-lyase, Fe-S type, tartrate/fumarate family         | 100 | 99  | 100 | 99 |
| BMAA1798   | bacterioferritin                                         | 100 | 100 | 100 | 99 |
| BMAA1799   | glutamate racemase                                       | 100 | 98  | 99  | 88 |
| BMAA1800   | bacterioferritin-associated ferredoxin, putative         | 100 | 100 | 100 | 96 |
| BMAA1801   | TonB protein, putative                                   | 100 | 97  | 100 | 89 |
| BMAA1802   | MotA/TolQ/ExbB proton channel family protein             | 100 | 99  | 100 | 97 |
| BMAA1803   | biopolymer transport protein, ExbD/TolR family           | 100 | 100 | 100 | 97 |
| BMAA1806   | hypothetical protein                                     | 100 | 99  | 100 | 93 |
| BMAA1826   | TonB-dependent heme/hemoglobin receptor family protein   | 100 | 99  | 100 | 93 |
| BMAA1827   | hemin transport protein HmuS                             | 100 | 99  | 100 | 89 |
| BMAA1828   | hemin ABC transporter, periplasmic hemin-binding protein | 100 | 99  | 100 | 93 |
| BMAA1829   | hemin ABC transporter, permease protein                  | 100 | 99  | 100 | 88 |
| BMAA1830   | hemin ABC transporter, ATP-binding protein               | 100 | 100 | 100 | 88 |
| BMAA1831   | membrane protein, putative                               | 100 | 100 | 100 | 94 |
| BMAA1832   | penicillin-binding protein, 1A family                    | 100 | 99  | 100 | 91 |
| BMAA1833   | chromosome initiation inhibitor IciA, putative           | 100 | 99  | 100 | 94 |
| BMAA1834   | L-allo-threonine aldolase                                | 100 | 99  | 100 | 96 |
| BMAA1835   | ubiquinol oxidase family protein                         | 100 | 100 | 100 | 97 |
| BMAA1836   | cyanide-insensitive terminal oxidase                     | 100 | 99  | 100 | 97 |
| BMAA1836.1 | hypothetical protein                                     | 98  | 100 | 100 | 95 |
| BMAA1840   | squalene/phytoene synthase family protein                | 100 | 98  | 100 | 94 |
| BMAA1846   | hypothetical protein                                     | 100 | 100 | 98  | 93 |
| BMAA1847   | lipoprotein, putative                                    | 100 | 99  | 100 | 92 |
| BMAA1853   | acetyltransferase, GNAT family                           | 100 | 100 | 100 | 93 |
| BMAA1856   | MgtC family protein                                      | 100 | 99  | 100 | 95 |
| BMAA1857   | conserved hypothetical protein                           | 100 | 99  | 99  | 93 |
| BMAA1858   | transcriptional regulator, LysR family                   | 100 | 98  | 100 | 91 |

|            |                                                                                                |     |     |     |    |
|------------|------------------------------------------------------------------------------------------------|-----|-----|-----|----|
| BMAA1860   | methyl-accepting chemotaxis protein                                                            | 100 | 99  | 100 | 96 |
| BMAA1862   | radical SAM domain protein                                                                     | 100 | 100 | 100 | 93 |
| BMAA1867   | conserved hypothetical protein                                                                 | 100 | 100 | 100 | 96 |
| BMAA1868   | aconitate hydratase                                                                            | 100 | 99  | 100 | 97 |
| BMAA1869   | 2-methylcitrate synthase/citrate synthase II                                                   | 100 | 100 | 100 | 98 |
| BMAA1870   | methylisocitrate lyase                                                                         | 100 | 100 | 100 | 98 |
| BMAA1871   | propionate catabolism operon regulatory protein                                                | 100 | 99  | 100 | 94 |
| BMAA1872   | methyl-accepting chemotaxis protein                                                            | 100 | 99  | 100 | 89 |
| BMAA1876   | proline iminopeptidase                                                                         | 100 | 99  | 100 | 93 |
| BMAA1889   | glyoxalase family protein                                                                      | 100 | 99  | 100 | 86 |
| BMAA1890   | O-acetylhomoserine/O-acetylserine sulfhydrylase                                                | 100 | 100 | 100 | 95 |
| BMAA1918   | transcriptional regulator, LysR family                                                         | 100 | 99  | 100 | 95 |
| BMAA1919   | class III extradiol-type catecholic dioxygenase, putative                                      | 100 | 99  | 97  | 89 |
| BMAA1920   | quinone oxidoreductase, putative                                                               | 100 | 100 | 100 | 93 |
| BMAA1921   | asparagine synthase (glutamine-hydrolyzing)                                                    | 100 | 99  | 100 | 95 |
| BMAA1922   | pyoverdin chromophore biosynthetic protein PvcC                                                | 100 | 99  | 100 | 95 |
| BMAA1923   | pyoverdine chromophore biosynthetic protein PvcB                                               | 100 | 97  | 100 | 88 |
| BMAA1924   | pyoverdine chromophore biosynthetic protein PvcA                                               | 100 | 99  | 100 | 88 |
| BMAA1926   | alpha-1,2-mannosidase family protein                                                           | 100 | 99  | 100 | 95 |
| BMAA1927   | conserved domain protein                                                                       | 100 | 99  | 100 | 95 |
| BMAA1929   | conserved hypothetical protein                                                                 | 100 | 97  | 99  | 90 |
| BMAA1932   | transcriptional regulator, LysR family                                                         | 100 | 99  | 100 | 92 |
| BMAA1933   | D-amino acid dehydrogenase, small subunit, putative                                            | 100 | 100 | 100 | 92 |
| BMAA1934   | glutamate/aspartate ABC transporter, periplasmic glutamate/aspartate-binding protein, putative | 100 | 100 | 100 | 95 |
| BMAA1937   | fatty acid desaturase domain protein                                                           | 100 | 99  | 100 | 87 |
| BMAA1939   | conserved hypothetical protein                                                                 | 100 | 100 | 100 | 89 |
| BMAA1940   | transcriptional regulator, LysR family                                                         | 100 | 99  | 100 | 97 |
| BMAA1941   | hippurate hydrolase                                                                            | 100 | 99  | 100 | 96 |
| BMAA1944   | ATP-dependent RNA helicase DbpA                                                                | 100 | 99  | 100 | 95 |
| BMAA1950   | transcriptional regulator, lclR family                                                         | 100 | 100 | 100 | 97 |
| BMAA1951   | citrate lyase, beta subunit, putative                                                          | 100 | 100 | 100 | 94 |
| BMAA1952   | outer membrane porin, putative                                                                 | 100 | 99  | 100 | 90 |
| BMAA1953   | MmgE/PrpD family protein                                                                       | 100 | 98  | 100 | 91 |
| BMAA1953.1 | OpgC protein, putative                                                                         | 100 | 99  | 99  | 88 |
| BMAA1956   | rarD protein                                                                                   | 100 | 99  | 100 | 91 |
| BMAA1957   | acylphosphatase                                                                                | 100 | 100 | 100 | 94 |
| BMAA1958   | dihydroflavonol-4-reductase family protein                                                     | 100 | 99  | 100 | 95 |
| BMAA1960   | glycosyl transferase, group 2 family protein                                                   | 100 | 98  | 100 | 96 |
| BMAA1961   | hypothetical protein                                                                           | 100 | 100 | 100 | 87 |
| BMAA1962   | hydroxymethylbutenyl pyrophosphate reductase                                                   | 100 | 100 | 100 | 98 |
| BMAA1963   | radical SAM domain protein                                                                     | 100 | 99  | 100 | 96 |
| BMAA1964   | conserved hypothetical protein                                                                 | 100 | 100 | 100 | 88 |
| BMAA1966   | glutamate-1-semialdehyde 2,1-aminomutase, putative                                             | 100 | 99  | 100 | 92 |
| BMAA2000   | 2-hydroxy-3-oxopropionate reductase                                                            | 100 | 99  | 100 | 94 |
| BMAA2001   | monooxygenase, putative                                                                        | 100 | 100 | 100 | 95 |
| BMAA2003   | 4'-phosphopantetheinyl transferase family protein                                              | 100 | 100 | 99  | 92 |
| BMAA2004   | membrane protein, putative                                                                     | 100 | 100 | 100 | 93 |
| BMAA2006   | flavin reductase domain protein                                                                | 100 | 97  | 100 | 87 |
| BMAA2009   | hypothetical protein                                                                           | 100 | 99  | 100 | 95 |

|          |                                                                              |     |     |     |    |
|----------|------------------------------------------------------------------------------|-----|-----|-----|----|
| BMAA2010 | 2-oxoisovalerate dehydrogenase, E3 component, dihydrolipoamide dehydrogenase | 100 | 99  | 100 | 94 |
| BMAA2012 | 2-oxoisovalerate dehydrogenase, E1 component, beta subunit                   | 100 | 100 | 100 | 97 |
| BMAA2013 | 2-oxoisovalerate dehydrogenase, E1 component, alpha subunit                  | 100 | 99  | 100 | 97 |
| BMAA2017 | conserved hypothetical protein                                               | 100 | 100 | 99  | 96 |
| BMAA2018 | conserved hypothetical protein                                               | 100 | 100 | 100 | 89 |
| BMAA2019 | hypothetical protein                                                         | 100 | 97  | 97  | 88 |
| BMAA2020 | transcriptional regulator, LysR family                                       | 100 | 100 | 100 | 96 |
| BMAA2022 | cholesterol oxidase, putative                                                | 100 | 99  | 100 | 95 |
| BMAA2023 | pyridine nucleotide-disulphide oxidoreductase family protein                 | 100 | 99  | 100 | 90 |
| BMAA2024 | C4-type zinc finger protein, DksA/TraR family                                | 100 | 100 | 100 | 96 |
| BMAA2026 | intracellular polyhydroxyalkanoate depolymerase                              | 100 | 99  | 100 | 88 |
| BMAA2027 | conserved hypothetical protein                                               | 100 | 100 | 100 | 90 |
| BMAA2028 | conserved hypothetical protein                                               | 100 | 99  | 100 | 88 |
| BMAA2030 | conserved hypothetical protein, authentic point mutation                     | 100 | 98  | 100 | 93 |
| BMAA2031 | sulfate permease family protein                                              | 100 | 99  | 100 | 90 |
| BMAA2033 | CBS domain protein                                                           | 100 | 98  | 100 | 90 |
| BMAA2034 | conserved hypothetical protein                                               | 100 | 99  | 100 | 92 |
| BMAA2035 | stress response protein                                                      | 100 | 99  | 99  | 93 |
| BMAA2055 | penicillin-binding protein, 1A family                                        | 100 | 99  | 100 | 92 |
| BMAA2061 | amidase family protein                                                       | 100 | 99  | 100 | 88 |
| BMAA2070 | sensor histidine kinase                                                      | 100 | 99  | 100 | 94 |
| BMAA2071 | DNA-binding response regulator, LuxR family                                  | 100 | 100 | 100 | 95 |
| BMAA2072 | ISBma1, transposase                                                          | 100 | 99  | 100 | 98 |
| BMAA2076 | conserved hypothetical protein                                               | 100 | 100 | 100 | 97 |
| BMAA2077 | conserved hypothetical protein                                               | 100 | 99  | 100 | 96 |
| BMAA2078 | sensory box/GGDEF/EAL domain protein                                         | 100 | 99  | 100 | 97 |
| BMAA2079 | hypothetical protein                                                         | 100 | 100 | 100 | 91 |
| BMAA2080 | lipase                                                                       | 100 | 99  | 100 | 89 |
| BMAA2081 | 4'-phosphopantetheinyl transferase family protein                            | 100 | 100 | 99  | 90 |
| BMAA2082 | hypothetical protein                                                         | 100 | 99  | 100 | 97 |
| BMAA2083 | hypothetical protein                                                         | 100 | 100 | 100 | 94 |
| BMAA2084 | conserved hypothetical protein                                               | 100 | 99  | 100 | 95 |
| BMAA2085 | ABC transporter, permease protein, putative                                  | 100 | 99  | 100 | 91 |
| BMAA2086 | ABC transporter, ATP-binding protein                                         | 100 | 99  | 100 | 96 |
| BMAA2087 | monooxygenase, flavin-binding family                                         | 100 | 99  | 100 | 94 |
| BMAA2088 | cytochrome P450-related protein                                              | 100 | 99  | 100 | 92 |
| BMAA2090 | acyl transferase domain protein                                              | 100 | 98  | 100 | 88 |
| BMAA2092 | lipoprotein, putative                                                        | 100 | 97  | 100 | 87 |
| BMAA2093 | conserved hypothetical protein                                               | 100 | 99  | 100 | 93 |
| BMAA2094 | aminotransferase, class III                                                  | 100 | 99  | 100 | 95 |
| BMAA2095 | conserved hypothetical protein                                               | 100 | 100 | 100 | 91 |
| BMAA2096 | glutamine ABC transporter, ATP-binding protein                               | 100 | 100 | 100 | 97 |
| BMAA2097 | glutamine ABC transporter, permease protein                                  | 100 | 99  | 100 | 95 |
| BMAA2098 | glutamine ABC transporter, periplasmic glutamine-binding protein             | 100 | 99  | 100 | 93 |
| BMAA2099 | conserved hypothetical protein                                               | 100 | 98  | 100 | 92 |
| BMAA2100 | squalene-hopene cyclase                                                      | 100 | 99  | 100 | 96 |
| BMAA2102 | phytoene synthase, putative                                                  | 100 | 99  | 100 | 95 |
| BMAA2105 | GGDEF domain protein                                                         | 100 | 100 | 100 | 97 |
| BMAA2106 | conserved hypothetical protein                                               | 100 | 100 | 100 | 99 |

|          |                                              |     |     |     |    |
|----------|----------------------------------------------|-----|-----|-----|----|
| BMAA2107 | response regulator                           | 100 | 99  | 96  | 86 |
| BMAA2109 | sensor histidine kinase/response regulator   | 100 | 99  | 100 | 95 |
| BMAA2110 | NADPH-dependent FMN reductase domain protein | 100 | 98  | 100 | 91 |
| BMAA2111 | sigma-70 factor, putative                    | 100 | 99  | 100 | 97 |
| BMAA2113 | arsenate reductase                           | 100 | 99  | 100 | 89 |
| BMAA2114 | ParA family protein                          | 100 | 99  | 100 | 98 |
| BMAA2115 | parB family protein                          | 100 | 100 | 100 | 95 |
| BMAA2117 | plasmid replication protein, putative        | 100 | 100 | 100 | 98 |

**Segment 2- Conserved in Bm and Bp but not as well or absent in Bt**

| Gene      | Description                                            | to Bp    |            |
|-----------|--------------------------------------------------------|----------|------------|
|           |                                                        | % length | % identity |
| BMA0004   | IS407A, transposase OrfA                               | 100      | 98         |
| BMA0005   | IS407A, transposase OrfB                               | 100      | 99         |
| BMA0012   | hypothetical protein                                   | 100      | 100        |
| BMA0013   | hypothetical protein                                   | 100      | 100        |
| BMA0014   | hypothetical protein                                   | 100      | 99         |
| BMA0015   | hypothetical protein                                   | 100      | 99         |
| BMA0021   | hypothetical protein                                   | 100      | 100        |
| BMA0022   | hypothetical protein                                   | 100      | 100        |
| BMA0025   | hypothetical protein                                   | 100      | 98         |
| BMA0026   | EAL/GGDEF domain protein                               | 100      | 99         |
| BMA0031   | hypothetical protein                                   | 100      | 98         |
| BMA0033   | PAP2 family protein                                    | 100      | 98         |
| BMA0034   | hypothetical protein                                   | 100      | 100        |
| BMA0035   | hypothetical protein                                   | 100      | 99         |
| BMA0036   | hypothetical protein                                   | 100      | 98         |
| BMA0038   | conserved hypothetical protein                         | 100      | 99         |
| BMA0049   | hypothetical protein                                   | 100      | 99         |
| BMA0050   | hypothetical protein                                   | 100      | 98         |
| BMA0051   | ISBma2, transposase                                    | 100      | 100        |
| BMA0053.1 | hypothetical protein                                   | 100      | 99         |
| BMA0059   | hypothetical protein                                   | 100      | 95         |
| BMA0071   | conserved hypothetical protein                         | 100      | 99         |
| BMA0078   | transcriptional regulator, lclR family                 | 100      | 100        |
| BMA0079   | conserved hypothetical protein                         | 100      | 98         |
| BMA0080   | conserved hypothetical protein                         | 100      | 99         |
| BMA0082   | ISBma2, transposase                                    | 100      | 100        |
| BMA0105   | conserved hypothetical protein                         | 100      | 97         |
| BMA0110   | IS407A, transposase OrfB                               | 100      | 99         |
| BMA0111   | IS407A, transposase OrfA                               | 100      | 98         |
| BMA0116   | DNA-3-methyladenine glycosylase II                     | 100      | 99         |
| BMA0120   | hypothetical protein                                   | 100      | 97         |
| BMA0122   | transcriptional regulator, LysR family                 | 100      | 99         |
| BMA0123   | ABC transporter, periplasmic substrate-binding protein | 100      | 98         |
| BMA0124   | histone deacetylase family protein                     | 100      | 99         |
| BMA0125   | hydrolase, carbon-nitrogen family                      | 100      | 99         |
| BMA0129   | hypothetical protein                                   | 100      | 98         |



|           |                                                        |     |     |
|-----------|--------------------------------------------------------|-----|-----|
| BMA0130   | conserved hypothetical protein                         | 100 | 100 |
| BMA0131   | IS407A, transposase OrfB                               | 100 | 99  |
| BMA0132   | IS407A, transposase OrfA                               | 100 | 97  |
| BMA0151   | hypothetical protein                                   | 100 | 98  |
| BMA0168   | ISBma2, transposase                                    | 100 | 99  |
| BMA0169   | hypothetical protein                                   | 100 | 98  |
| BMA0182   | hypothetical protein                                   | 100 | 99  |
| BMA0190   | thiopurine S-methyltransferase family protein          | 100 | 98  |
| BMA0205   | hypothetical protein                                   | 100 | 98  |
| BMA0214   | hypothetical protein                                   | 100 | 97  |
| BMA0224   | hypothetical protein                                   | 100 | 98  |
| BMA0226.1 | hypothetical protein                                   | 100 | 100 |
| BMA0232   | membrane protein, putative                             | 100 | 99  |
| BMA0234   | asparagine synthase (glutamine-hydrolyzing)            | 100 | 99  |
| BMA0235   | 3-phosphoshikimate-1-carboxyvinyltransferase, putative | 100 | 99  |
| BMA0236   | 3-phosphoshikimate-1-carboxyvinyltransferase, putative | 100 | 99  |
| BMA0237   | conserved hypothetical protein                         | 100 | 100 |
| BMA0238   | hypothetical protein                                   | 100 | 99  |
| BMA0251   | hypothetical protein                                   | 100 | 95  |
| BMA0256   | conserved hypothetical protein                         | 100 | 100 |
| BMA0257   | conserved domain protein                               | 100 | 96  |
| BMA0258   | hypothetical protein                                   | 100 | 98  |
| BMA0265   | IS407A, transposase OrfA                               | 100 | 98  |
| BMA0266   | IS407A, transposase OrfB                               | 100 | 99  |
| BMA0273   | regulatory protein RecX, putative                      | 100 | 99  |
| BMA0274   | conserved hypothetical protein                         | 100 | 99  |
| BMA0280   | hypothetical protein                                   | 100 | 100 |
| BMA0284   | IS407A, transposase OrfB                               | 100 | 99  |
| BMA0285   | IS407A, transposase OrfA                               | 100 | 98  |
| BMA0297   | hypothetical protein                                   | 100 | 100 |
| BMA0306   | hypothetical protein                                   | 96  | 100 |
| BMA0321   | IS407A, transposase OrfB                               | 100 | 99  |
| BMA0322   | IS407A, transposase OrfA                               | 100 | 98  |
| BMA0339   | transcriptional regulator, LysR family                 | 100 | 100 |
| BMA0340   | esterase, putative                                     | 100 | 99  |
| BMA0341   | major facilitator family transporter                   | 100 | 99  |
| BMA0349   | hypothetical protein                                   | 100 | 97  |
| BMA0357   | conserved domain protein                               | 100 | 98  |
| BMA0376   | conserved hypothetical protein                         | 100 | 99  |
| BMA0381   | ISBma2, transposase                                    | 100 | 100 |
| BMA0384   | hypothetical protein                                   | 100 | 98  |
| BMA0385   | hypothetical protein                                   | 100 | 99  |
| BMA0388   | ISBma2, transposase                                    | 100 | 100 |
| BMA0399   | acetyltransferase, GNAT family                         | 100 | 100 |
| BMA0405   | membrane protein, putative                             | 100 | 99  |
| BMA0417   | murein transglycosylase domain protein                 | 100 | 99  |
| BMA0425   | conserved hypothetical protein                         | 96  | 100 |
| BMA0426   | ISBma2, transposase                                    | 100 | 100 |
| BMA0441   | IS407A, transposase OrfB                               | 100 | 99  |

|           |                                               |     |     |
|-----------|-----------------------------------------------|-----|-----|
| BMA0442   | IS407A, transposase OrfA                      | 100 | 98  |
| BMA0456   | hypothetical protein                          | 100 | 98  |
| BMA0459   | hypothetical protein                          | 100 | 97  |
| BMA0470.1 | hypothetical protein                          | 100 | 98  |
| BMA0470.2 | hypothetical protein                          | 100 | 99  |
| BMA0470.3 | hypothetical protein                          | 100 | 98  |
| BMA0475   | conserved hypothetical protein                | 100 | 96  |
| BMA0483   | IS407A, transposase OrfB                      | 100 | 99  |
| BMA0484   | IS407A, transposase OrfA                      | 100 | 98  |
| BMA0485   | pseudouridine synthase family protein         | 100 | 100 |
| BMA0488   | ISBma2, transposase                           | 100 | 100 |
| BMA0491   | hypothetical protein                          | 99  | 95  |
| BMA0495   | IS407A, transposase OrfB                      | 100 | 99  |
| BMA0496   | IS407A, transposase OrfA                      | 100 | 98  |
| BMA0500   | IS407A, transposase OrfB                      | 100 | 99  |
| BMA0501   | IS407A, transposase OrfA                      | 100 | 98  |
| BMA0504   | hypothetical protein                          | 100 | 100 |
| BMA0505   | hypothetical protein                          | 100 | 95  |
| BMA0520   | ribonuclease E                                | 100 | 99  |
| BMA0535   | lipoprotein, putative                         | 100 | 99  |
| BMA0543   | ribonuclease III/hypothetical protein, fusion | 100 | 99  |
| BMA0573   | IS407A, transposase OrfB                      | 100 | 99  |
| BMA0574   | IS407A, transposase OrfA                      | 100 | 98  |
| BMA0579   | conserved domain protein, degenerate          | 100 | 98  |
| BMA0585   | IS407A, transposase OrfA                      | 100 | 98  |
| BMA0586   | IS407A, transposase OrfB                      | 100 | 99  |
| BMA0597   | glutathione S-transferase, putative           | 100 | 99  |
| BMA0611   | sufD domain protein                           | 100 | 99  |
| BMA0628   | conserved hypothetical protein                | 100 | 98  |
| BMA0633.1 | hypothetical protein                          | 100 | 99  |
| BMA0643.1 | hypothetical protein                          | 100 | 98  |
| BMA0648   | conserved domain protein                      | 100 | 100 |
| BMA0658   | IS407A, transposase OrfB                      | 100 | 99  |
| BMA0659   | IS407A, transposase OrfA                      | 100 | 98  |
| BMA0661   | conserved domain protein                      | 100 | 96  |
| BMA0674   | hypothetical protein                          | 100 | 99  |
| BMA0676   | ISBma2, transposase                           | 100 | 99  |
| BMA0690   | phosphoglycerate mutase family protein        | 100 | 100 |
| BMA0692   | hypothetical protein                          | 100 | 100 |
| BMA0706.1 | hypothetical protein                          | 100 | 96  |
| BMA0720   | IS407A, transposase OrfA                      | 100 | 98  |
| BMA0721   | IS407A, transposase OrfB                      | 100 | 99  |
| BMA0724   | lipoprotein, putative                         | 100 | 99  |
| BMA0728   | ISBma2, transposase                           | 100 | 100 |
| BMA0740   | conserved hypothetical protein                | 100 | 99  |
| BMA0757   | IS407A, transposase OrfB                      | 100 | 99  |
| BMA0758   | IS407A, transposase OrfA                      | 100 | 98  |
| BMA0767   | major facilitator family transporter          | 100 | 99  |
| BMA0790   | PAP2 family protein                           | 100 | 98  |

|           |                                                                                   |     |     |
|-----------|-----------------------------------------------------------------------------------|-----|-----|
| BMA0793   | gp33, truncation, frameshift                                                      | 100 | 97  |
| BMA0794   | conserved hypothetical protein                                                    | 98  | 95  |
| BMA0805   | IS407A, transposase OrfA                                                          | 100 | 98  |
| BMA0806   | IS407A, transposase OrfB                                                          | 100 | 99  |
| BMA0810   | transposase ORF B, degenerate                                                     | 100 | 95  |
| BMA0812   | transcriptional regulator, GntR family                                            | 100 | 99  |
| BMA0813   | conserved hypothetical protein                                                    | 99  | 99  |
| BMA0815   | conserved hypothetical protein                                                    | 100 | 96  |
| BMA0816   | maltooligosyl trehalose synthase, putative                                        | 100 | 99  |
| BMA0817   | 4-alpha-glucanotransferase                                                        | 100 | 99  |
| BMA0819   | glycogen operon protein GlgX, putative                                            | 100 | 99  |
| BMA0821   | alpha amylase family protein                                                      | 100 | 99  |
| BMA0822   | alpha amylase family protein                                                      | 100 | 99  |
| BMA0822.1 | hypothetical protein                                                              | 100 | 95  |
| BMA0831   | hypothetical protein                                                              | 100 | 99  |
| BMA0832   | transcriptional regulator, LysR family                                            | 100 | 98  |
| BMA0833   | DNA-binding response regulator                                                    | 100 | 100 |
| BMA0835   | hypothetical protein                                                              | 100 | 97  |
| BMA0836   | prophage protein, putative                                                        | 100 | 97  |
| BMA0838   | DNA-binding response regulator                                                    | 100 | 99  |
| BMA0840   | haemagglutinin family protein                                                     | 100 | 99  |
| BMA0841   | ompA family protein                                                               | 100 | 99  |
| BMA0842   | TPR Domain domain protein                                                         | 100 | 99  |
| BMA0843   | H-NS histone family protein                                                       | 100 | 99  |
| BMA0845   | hypothetical protein                                                              | 100 | 99  |
| BMA0846   | hypothetical protein                                                              | 100 | 98  |
| BMA0847   | galactose oxidase-related protein                                                 | 100 | 99  |
| BMA0850.2 | lipoprotein, putative                                                             | 100 | 99  |
| BMA0853   | conserved hypothetical protein                                                    | 100 | 98  |
| BMA0857   | IS407A, transposase OrfB                                                          | 100 | 99  |
| BMA0858   | IS407A, transposase OrfA                                                          | 100 | 98  |
| BMA0859   | hypothetical protein                                                              | 100 | 98  |
| BMA0872   | conserved hypothetical protein                                                    | 100 | 99  |
| BMA0880   | putative trans-aconitate methyltransferase fragment                               | 100 | 98  |
| BMA0882   | drug resistance transporter, EmrB/QacA family                                     | 100 | 99  |
| BMA0883   | multidrug resistance protein, putative                                            | 100 | 99  |
| BMA0884   | hypothetical protein                                                              | 100 | 99  |
| BMA0898   | IS407A, transposase OrfA                                                          | 100 | 98  |
| BMA0899   | IS407A, transposase OrfB                                                          | 100 | 99  |
| BMA0902   | hypothetical protein                                                              | 100 | 99  |
| BMA0908   | branched-chain amino acid ABC transporter, permease/ATP binding protein, putative | 100 | 97  |
| BMA0917   | SIS domain protein                                                                | 100 | 99  |
| BMA0931   | methyl-accepting chemotaxis protein, putative                                     | 100 | 99  |
| BMA0938   | Ser/Thr protein phosphatase family protein                                        | 100 | 97  |
| BMA0940   | conserved hypothetical protein                                                    | 100 | 100 |
| BMA0948   | IS407A, transposase OrfB                                                          | 100 | 99  |
| BMA0949   | IS407A, transposase OrfA                                                          | 100 | 98  |
| BMA0950   | transcriptional regulator, MerR family                                            | 100 | 100 |
| BMA0952   | RND efflux system, outer membrane lipoprotein, NodT family                        | 100 | 99  |

|           |                                                                              |     |     |
|-----------|------------------------------------------------------------------------------|-----|-----|
| BMA0959   | hypothetical protein                                                         | 100 | 98  |
| BMA0971.1 | hypothetical protein                                                         | 100 | 96  |
| BMA0975   | hypothetical protein                                                         | 100 | 97  |
| BMA0983   | lipoprotein, putative                                                        | 100 | 99  |
| BMA0984   | hypothetical protein                                                         | 100 | 99  |
| BMA0985   | hypothetical protein                                                         | 100 | 98  |
| BMA0989   | hypothetical protein                                                         | 100 | 98  |
| BMA0999   | methyl-accepting chemotaxis protein, putative                                | 100 | 99  |
| BMA1002   | conserved domain protein                                                     | 100 | 98  |
| BMA1007   | hypothetical protein                                                         | 100 | 97  |
| BMA1011   | hypothetical protein                                                         | 100 | 97  |
| BMA1012   | polyhydroxyalkanoate depolymerase domain protein                             | 100 | 99  |
| BMA1015   | conserved hypothetical protein                                               | 100 | 100 |
| BMA1022   | fimbrial chaperone protein                                                   | 100 | 99  |
| BMA1023   | outer membrane usher protein                                                 | 100 | 99  |
| BMA1024   | type-1 fimbrial protein, A subunit                                           | 100 | 99  |
| BMA1025   | hypothetical protein                                                         | 100 | 97  |
| BMA1027.1 | hypothetical protein                                                         | 99  | 98  |
| BMA1034   | DNA-binding response regulator                                               | 100 | 100 |
| BMA1035   | IS407A, transposase OrfB, truncation                                         | 100 | 99  |
| BMA1036   | ISBma2, transposase, truncation                                              | 100 | 100 |
| BMA1038   | penicillin amidase, putative                                                 | 100 | 99  |
| BMA1039   | carbamoyltransferase family, truncation                                      | 100 | 99  |
| BMA1040   | IS407A, transposase OrfA                                                     | 100 | 98  |
| BMA1041   | IS407A, transposase OrfB                                                     | 100 | 99  |
| BMA1042   | hypothetical protein                                                         | 100 | 97  |
| BMA1066   | segregation and condensation protein B                                       | 100 | 96  |
| BMA1077   | IS407A, transposase OrfB                                                     | 100 | 99  |
| BMA1078   | IS407A, transposase OrfA                                                     | 100 | 98  |
| BMA1079   | ISBma2, transposase, truncation                                              | 100 | 99  |
| BMA1082   | IS407A, transposase OrfA                                                     | 100 | 98  |
| BMA1083   | IS407A, transposase OrfB                                                     | 100 | 99  |
| BMA1102   | conserved hypothetical protein                                               | 100 | 98  |
| BMA1113   | conserved hypothetical protein                                               | 100 | 99  |
| BMA1118   | IS407A, transposase OrfA                                                     | 100 | 98  |
| BMA1119   | IS407A, transposase OrfB                                                     | 100 | 99  |
| BMA1120   | histidinol-phosphate aminotransferase, putative, authentic point mutation    | 96  | 99  |
| BMA1121   | jmjC domain protein                                                          | 100 | 99  |
| BMA1123   | peptide synthetase, putative                                                 | 100 | 97  |
| BMA1126   | transcriptional regulator, AraC family                                       | 100 | 98  |
| BMA1128.1 | hypothetical protein                                                         | 100 | 100 |
| BMA1132   | hypothetical protein                                                         | 100 | 99  |
| BMA1135   | drug resistance transporter, EmrB/QacA family                                | 100 | 99  |
| BMA1141.1 | hypothetical protein                                                         | 100 | 98  |
| BMA1141.2 | hypothetical protein                                                         | 100 | 100 |
| BMA1152   | transcriptional regulator, MarR family                                       | 99  | 98  |
| BMA1153   | amino acid ABC transporter, periplasmic amino acid-binding protein, putative | 100 | 99  |
| BMA1155   | major facilitator family transporter                                         | 100 | 99  |
| BMA1156   | fenI protein                                                                 | 99  | 99  |

|           |                                                          |     |     |
|-----------|----------------------------------------------------------|-----|-----|
| BMA1169   | magnesium chelatase, putative, authentic frameshift      | 100 | 95  |
| BMA1176   | cobyrinic acid a,c-diamide synthase                      | 100 | 98  |
| BMA1180   | non-ribosomal peptide synthetase, putative               | 100 | 99  |
| BMA1181   | non-ribosomal peptide synthetase, putative               | 100 | 99  |
| BMA1201   | conserved domain protein                                 | 100 | 99  |
| BMA1202   | hypothetical protein                                     | 100 | 99  |
| BMA1203   | IS407A, transposase OrfB                                 | 100 | 99  |
| BMA1204   | IS407A, transposase OrfA                                 | 100 | 98  |
| BMA1214   | conserved hypothetical protein                           | 100 | 97  |
| BMA1216   | IS407A, transposase OrfB                                 | 100 | 99  |
| BMA1217   | IS407A, transposase OrfA                                 | 100 | 98  |
| BMA1231   | IS407A, transposase OrfA                                 | 100 | 98  |
| BMA1232   | IS407A, transposase OrfB                                 | 100 | 99  |
| BMA1242.1 | hypothetical protein                                     | 100 | 100 |
| BMA1242.2 | hypothetical protein                                     | 100 | 98  |
| BMA1256   | IS407A, transposase OrfA                                 | 100 | 98  |
| BMA1257   | IS407A, transposase OrfB                                 | 100 | 99  |
| BMA1265   | ISBma2, transposase                                      | 100 | 99  |
| BMA1268   | phosphoesterase family protein                           | 100 | 100 |
| BMA1278   | hypothetical protein                                     | 100 | 96  |
| BMA1279   | hypothetical protein                                     | 100 | 97  |
| BMA1284   | conserved hypothetical protein                           | 100 | 96  |
| BMA1286   | membrane protein, putative                               | 100 | 99  |
| BMA1295   | IS407A, transposase OrfA                                 | 100 | 98  |
| BMA1296   | IS407A, transposase OrfB, authentic point mutation       | 100 | 99  |
| BMA1315   | conserved hypothetical protein                           | 100 | 98  |
| BMA1352   | hypothetical protein                                     | 100 | 96  |
| BMA1361   | DNA polymerase III, subunit gamma, putative              | 100 | 99  |
| BMA1375   | conserved domain protein                                 | 100 | 99  |
| BMA1397   | lipoprotein, NLP/P60 family                              | 100 | 98  |
| BMA1406   | RNA polymerase sigma-70 factor, ECF subfamily            | 100 | 98  |
| BMA1409   | IS407A, transposase OrfB                                 | 100 | 99  |
| BMA1410   | IS407A, transposase OrfA                                 | 100 | 98  |
| BMA1445   | acetyltransferase, GNAT family                           | 100 | 98  |
| BMA1478   | IS407A, transposase OrfB                                 | 100 | 99  |
| BMA1479   | IS407A, transposase OrfA                                 | 100 | 97  |
| BMA1480   | conserved hypothetical protein, degenerate               | 100 | 95  |
| BMA1496   | conserved hypothetical protein                           | 100 | 99  |
| BMA1500   | ISBma2, transposase                                      | 100 | 100 |
| BMA1503   | ISBma2, transposase                                      | 100 | 100 |
| BMA1518   | conserved hypothetical protein                           | 100 | 100 |
| BMA1519   | conserved hypothetical protein, authentic point mutation | 100 | 99  |
| BMA1519.1 | hypothetical protein                                     | 100 | 98  |
| BMA1521   | hypothetical protein                                     | 100 | 95  |
| BMA1523   | conserved hypothetical protein                           | 100 | 97  |
| BMA1573   | hypothetical protein                                     | 100 | 99  |
| BMA1585   | ISBma2, transposase                                      | 100 | 99  |
| BMA1592   | conserved hypothetical protein                           | 100 | 100 |
| BMA1609.1 | hypothetical protein                                     | 100 | 97  |

|           |                                                      |     |     |
|-----------|------------------------------------------------------|-----|-----|
| BMA1614   | ferredoxin--NADP reductase                           | 100 | 100 |
| BMA1615   | molybdenum cofactor biosynthesis protein A, putative | 100 | 98  |
| BMA1616   | ferredoxin                                           | 100 | 100 |
| BMA1639   | methyltransferase, putative/adenylsulfate kinase     | 100 | 98  |
| BMA1665   | hypothetical protein                                 | 100 | 98  |
| BMA1697   | conserved hypothetical protein                       | 100 | 99  |
| BMA1715   | ISBma2, transposase                                  | 100 | 100 |
| BMA1718   | ISBma2, transposase                                  | 100 | 100 |
| BMA1725   | hypothetical protein                                 | 100 | 95  |
| BMA1739   | ISBma2, transposase                                  | 100 | 100 |
| BMA1742   | ISBma2, transposase                                  | 100 | 100 |
| BMA1754   | CoA transferase, CAIB/BAIF family                    | 100 | 97  |
| BMA1758   | ISBma2, transposase, truncation                      | 100 | 99  |
| BMA1759   | IS407A, transposase OrfB                             | 100 | 99  |
| BMA1760   | IS407A, transposase OrfA                             | 100 | 97  |
| BMA1768   | exodeoxyribonuclease V, alpha subunit                | 100 | 98  |
| BMA1788   | conserved hypothetical protein, degenerate           | 100 | 96  |
| BMA1795   | DNA-binding response regulator                       | 100 | 99  |
| BMA1800   | conserved domain protein                             | 100 | 100 |
| BMA1802   | glutathione S-transferase N-terminal domain protein  | 100 | 99  |
| BMA1808   | lipoprotein, putative                                | 100 | 99  |
| BMA1818   | NADH dehydrogenase I, L subunit                      | 100 | 99  |
| BMA1841   | IS407A, transposase OrfB                             | 100 | 99  |
| BMA1842   | IS407A, transposase OrfA                             | 100 | 98  |
| BMA1894   | phospholipase C accessory protein, putative          | 100 | 98  |
| BMA1894.2 | hypothetical protein                                 | 100 | 99  |
| BMA1898   | conserved hypothetical protein, authentic frameshift | 100 | 97  |
| BMA1903   | hypothetical protein                                 | 100 | 96  |
| BMA1904   | conserved domain protein                             | 100 | 99  |
| BMA1906   | conserved domain protein                             | 100 | 95  |
| BMA1918   | hypothetical protein                                 | 100 | 98  |
| BMA1920   | conserved hypothetical protein                       | 100 | 99  |
| BMA1922.1 | hypothetical protein                                 | 100 | 97  |
| BMA1932   | membrane protein, putative                           | 100 | 99  |
| BMA1936   | ATPase, AAA familyprotein                            | 100 | 99  |
| BMA1944   | conserved hypothetical protein                       | 100 | 98  |
| BMA1953   | IS407A, transposase OrfA                             | 100 | 98  |
| BMA1954   | IS407A, transposase OrfB                             | 100 | 99  |
| BMA1961.1 | hypothetical protein                                 | 100 | 97  |
| BMA1962   | transcriptional regulator, LysR family               | 100 | 98  |
| BMA1974   | IS407A, transposase OrfA                             | 100 | 98  |
| BMA1975   | IS407A, transposase OrfB                             | 100 | 99  |
| BMA1977   | glycosyl transferase family protein                  | 100 | 100 |
| BMA1978   | NAD-dependent epimerase/dehydratase family protein   | 100 | 99  |
| BMA1979   | glycosyl transferase, putative                       | 100 | 98  |
| BMA2030   | conserved hypothetical protein                       | 100 | 99  |
| BMA2070   | type IV pilus biogenesis protein, putative           | 100 | 100 |
| BMA2070.1 | hypothetical protein                                 | 100 | 100 |
| BMA2071.1 | hypothetical protein                                 | 100 | 100 |

|           |                                                              |     |     |
|-----------|--------------------------------------------------------------|-----|-----|
| BMA2073   | conserved hypothetical protein                               | 100 | 98  |
| BMA2086   | IS407A, transposase OrfA                                     | 100 | 98  |
| BMA2087   | IS407A, transposase OrfB                                     | 100 | 99  |
| BMA2103   | hypothetical protein                                         | 100 | 95  |
| BMA2103.1 | hypothetical protein                                         | 100 | 96  |
| BMA2103.2 | hypothetical protein                                         | 100 | 96  |
| BMA2124   | Smr domain protein                                           | 100 | 100 |
| BMA2137   | D-cysteine desulfhydrase                                     | 100 | 99  |
| BMA2137.1 | hypothetical protein                                         | 100 | 98  |
| BMA2139.1 | hypothetical protein                                         | 100 | 99  |
| BMA2157   | conserved hypothetical protein                               | 100 | 98  |
| BMA2164   | conserved hypothetical protein                               | 100 | 99  |
| BMA2165   | transcriptional regulator, Sir2 family                       | 100 | 97  |
| BMA2172   | hypothetical protein                                         | 100 | 99  |
| BMA2198   | IS407A, transposase OrfA                                     | 100 | 98  |
| BMA2199   | IS407A, transposase OrfB                                     | 100 | 99  |
| BMA2201   | hypothetical protein                                         | 100 | 100 |
| BMA2201.1 | hypothetical protein                                         | 100 | 98  |
| BMA2202   | translation initiation factor IF-1                           | 100 | 100 |
| BMA2203   | hydrolase, alpha/beta fold family                            | 100 | 100 |
| BMA2204   | membrane protein, putative                                   | 100 | 99  |
| BMA2206   | conserved hypothetical protein                               | 100 | 100 |
| BMA2214   | transcriptional regulator, LysR family                       | 100 | 99  |
| BMA2216   | major facilitator family transporter                         | 100 | 99  |
| BMA2217   | N-carbamyl-L-amino acid amidohydrolase                       | 100 | 100 |
| BMA2224   | IS407A, transposase OrfA                                     | 100 | 100 |
| BMA2225   | IS407A, transposase OrfB                                     | 100 | 99  |
| BMA2225.1 | hypothetical protein                                         | 100 | 100 |
| BMA2227   | ISBma2, transposase                                          | 100 | 100 |
| BMA2247   | hypothetical protein                                         | 100 | 97  |
| BMA2249   | IS407A, transposase OrfB                                     | 100 | 99  |
| BMA2250   | IS407A, transposase OrfA                                     | 100 | 98  |
| BMA2257.1 | hypothetical protein                                         | 100 | 98  |
| BMA2258   | citrate synthase family protein                              | 100 | 99  |
| BMA2268   | IS407A, transposase OrfB                                     | 100 | 99  |
| BMA2269   | IS407A, transposase OrfA                                     | 100 | 98  |
| BMA2270   | ISBma2, transposase, truncation                              | 100 | 100 |
| BMA2278   | ISBma2, transposase                                          | 100 | 100 |
| BMA2283   | IS407A, transposase OrfB                                     | 100 | 99  |
| BMA2284   | IS407A, transposase OrfA                                     | 100 | 98  |
| BMA2288   | UDP-3-O-[3-hydroxymyristoyl] N-acetylglucosamine deacetylase | 100 | 99  |
| BMA2289   | type I polyketide synthase WcbR                              | 100 | 99  |
| BMA2290   | putative capsular polysaccharide biosynthesis protein WcbQ   | 100 | 99  |
| BMA2291   | oxidoreductase, short-chain dehydrogenase/reductase family   | 100 | 99  |
| BMA2292   | capsule polysaccharide biosynthesis/export protein. putative | 100 | 99  |
| BMA2293   | D-glycero-D-manno-heptose 1,7-bisphosphate phosphatase       | 100 | 99  |
| BMA2294   | D-glycero-D-manno-heptose 1-phosphate guanosyltransferase    | 100 | 100 |
| BMA2295   | phosphoheptose isomerase                                     | 100 | 98  |
| BMA2296   | D-glycero-D-manno-heptose 7-phosphate kinase                 | 100 | 100 |

|         |                                                                                                 |     |     |
|---------|-------------------------------------------------------------------------------------------------|-----|-----|
| BMA2297 | GDP-D-mannose dehydratase, putative                                                             | 100 | 100 |
| BMA2298 | capsular polysaccharide biosynthesis protein, putative                                          | 100 | 100 |
| BMA2299 | capsular polysaccharide biosynthesis protein, putative                                          | 100 | 99  |
| BMA2300 | glycosyl transferase, group 1 family protein                                                    | 100 | 100 |
| BMA2301 | capsular polysaccharide biosynthesis protein, putative                                          | 100 | 99  |
| BMA2302 | capsular polysaccharide biosynthesis protein, putative                                          | 100 | 99  |
| BMA2303 | glycosyl transferase, group 1 family protein                                                    | 100 | 99  |
| BMA2304 | capsule polysaccharide ABC transporter, ATP-binding protein                                     | 100 | 100 |
| BMA2305 | capsular polysaccharide export inner-membrane protein                                           | 100 | 100 |
| BMA2306 | capsular polysaccharide export inner-membrane protein                                           | 100 | 100 |
| BMA2307 | capsular polysaccharide biosynthesis/export periplasmic protein                                 | 100 | 100 |
| BMA2308 | glycosyltransferase, putative                                                                   | 100 | 98  |
| BMA2309 | capsule polysaccharide biosynthesis/export protein, putative                                    | 100 | 99  |
| BMA2310 | mannose-1-phosphate guanylyltransferase/mannose-6-phosphate isomerase                           | 100 | 99  |
| BMA2327 | conserved hypothetical protein                                                                  | 100 | 99  |
| BMA2340 | ISBma2, transposase                                                                             | 100 | 100 |
| BMA2351 | lipoprotein, putative                                                                           | 100 | 98  |
| BMA2362 | ISBma2, transposase                                                                             | 100 | 100 |
| BMA2377 | lipoprotein, putative                                                                           | 100 | 99  |
| BMA2392 | hypothetical protein                                                                            | 100 | 100 |
| BMA2395 | transcriptional regulator, putative                                                             | 99  | 98  |
| BMA2397 | alkylphosphonate utilization operon, ATP-binding protein PhnN                                   | 100 | 99  |
| BMA2398 | conserved hypothetical protein                                                                  | 100 | 96  |
| BMA2399 | transcriptional regulator, GntR family                                                          | 100 | 99  |
| BMA2400 | alkylphosphonate utilization operon protein PhnG                                                | 100 | 100 |
| BMA2401 | alkylphosphonate utilization operon protein PhnH                                                | 100 | 100 |
| BMA2402 | alkylphosphonate utilization operon protein PhnI                                                | 100 | 98  |
| BMA2403 | alkylphosphonate utilization operon protein PhnJ                                                | 100 | 98  |
| BMA2404 | phosphonates ABC transporter, ATP-binding protein                                               | 100 | 99  |
| BMA2405 | phosphonates ABC transporter, ATP-binding protein                                               | 100 | 99  |
| BMA2406 | alkylphosphonate utilization operon protein PhnM                                                | 100 | 100 |
| BMA2407 | phosphonates ABC transporter, ATP-binding protein                                               | 100 | 99  |
| BMA2408 | phosphonates ABC transporter, periplasmic phosphonates-binding protein, authentic point mutatio | 100 | 99  |
| BMA2409 | phosphonates ABC transporter, permease protein                                                  | 100 | 99  |
| BMA2418 | ISBma2, transposase                                                                             | 100 | 100 |
| BMA2421 | conserved hypothetical protein                                                                  | 99  | 96  |
| BMA2425 | conserved hypothetical protein                                                                  | 100 | 100 |
| BMA2427 | heat shock protein, Hsp20 family                                                                | 100 | 98  |
| BMA2428 | heat shock protein, Hsp20 family                                                                | 100 | 100 |
| BMA2429 | hypothetical protein                                                                            | 100 | 98  |
| BMA2431 | chaperonin, 10 kDa                                                                              | 100 | 100 |
| BMA2432 | hypothetical protein                                                                            | 100 | 98  |
| BMA2433 | hypothetical protein                                                                            | 100 | 100 |
| BMA2454 | biopolymer transport protein, ExbD/ToIR family                                                  | 100 | 95  |
| BMA2470 | spermidine synthase, putative                                                                   | 100 | 100 |
| BMA2473 | conserved domain protein                                                                        | 100 | 99  |
| BMA2504 | conserved hypothetical protein                                                                  | 100 | 97  |
| BMA2527 | IS407A, transposase OrfB                                                                        | 100 | 99  |
| BMA2528 | IS407A, transposase OrfB                                                                        | 100 | 99  |



|           |                                                            |     |     |
|-----------|------------------------------------------------------------|-----|-----|
| BMA2529   | IS407A, transposase OrfA                                   | 100 | 97  |
| BMA2544   | AhpC/TSA family protein                                    | 100 | 98  |
| BMA2563   | ISBma2, transposase                                        | 100 | 100 |
| BMA2564   | IS407A, transposase OrfB                                   | 100 | 99  |
| BMA2565   | IS407A, transposase OrfA                                   | 100 | 97  |
| BMA2576   | phenylacetic acid degradation protein PaaD                 | 100 | 99  |
| BMA2592   | lipoprotein, putative                                      | 100 | 99  |
| BMA2595   | IS407A, transposase OrfB                                   | 100 | 99  |
| BMA2596   | IS407A, transposase OrfA                                   | 100 | 98  |
| BMA2654   | IS407A, transposase OrfA                                   | 100 | 97  |
| BMA2655   | IS407A, transposase OrfB                                   | 100 | 99  |
| BMA2672   | hypothetical protein                                       | 100 | 97  |
| BMA2681   | conserved hypothetical protein                             | 100 | 98  |
| BMA2682   | conserved hypothetical protein                             | 100 | 100 |
| BMA2687   | IS407A, transposase OrfB                                   | 100 | 99  |
| BMA2688   | IS407A, transposase OrfA                                   | 100 | 98  |
| BMA2689   | conserved hypothetical protein                             | 100 | 98  |
| BMA2690   | conserved hypothetical protein                             | 100 | 100 |
| BMA2694   | stringent starvation protein B                             | 100 | 98  |
| BMA2720   | hypothetical protein                                       | 100 | 98  |
| BMA2748   | type II/III secretion system protein                       | 100 | 99  |
| BMA2749   | hypothetical protein                                       | 100 | 99  |
| BMA2750   | fimbrial assembly protein PilN, putative                   | 100 | 99  |
| BMA2753   | ISBma2, transposase                                        | 100 | 100 |
| BMA2759   | IS407A, transposase OrfB                                   | 100 | 99  |
| BMA2760   | IS407A, transposase OrfA                                   | 100 | 98  |
| BMA2772   | hypothetical protein                                       | 100 | 95  |
| BMA2790   | ISBma2, transposase                                        | 100 | 100 |
| BMA2792   | IS407A, transposase OrfA                                   | 100 | 98  |
| BMA2793   | IS407A, transposase OrfB                                   | 100 | 99  |
| BMA2798   | cytochrome c family protein                                | 100 | 100 |
| BMA2803   | ISBma2, transposase                                        | 100 | 100 |
| BMA2813   | acyltransferase family protein                             | 100 | 99  |
| BMA2818.1 | hypothetical protein                                       | 100 | 100 |
| BMA2818.2 | hypothetical protein                                       | 100 | 100 |
| BMA2820   | secretion protein, putative                                | 100 | 99  |
| BMA2822.1 | hypothetical protein                                       | 100 | 96  |
| BMA2834   | IS407A, transposase OrfB                                   | 100 | 99  |
| BMA2835   | IS407A, transposase OrfA                                   | 100 | 98  |
| BMA2853   | hypothetical protein                                       | 100 | 98  |
| BMA2856   | chemotaxis protein methyltransferase CheR                  | 100 | 99  |
| BMA2876   | TPR domain protein                                         | 100 | 99  |
| BMA2877   | aminotransferase, DegT/DnrJ/EryC1/StrS family              | 100 | 100 |
| BMA2878   | 3-oxoacyl-(acyl-carrier-protein) synthase III, putative    | 100 | 99  |
| BMA2879   | hypothetical protein                                       | 100 | 98  |
| BMA2880   | 3-oxoacyl-(acyl-carrier-protein) synthase III, putative    | 100 | 99  |
| BMA2881   | oxidoreductase, short chain dehydrogenase/reductase family | 100 | 100 |
| BMA2882   | hexapeptide transferase family protein                     | 100 | 100 |
| BMA2883   | iron-sulfur cluster-binding protein, Rieske family         | 100 | 100 |

|         |                                                                 |     |     |
|---------|-----------------------------------------------------------------|-----|-----|
| BMA2884 | hypothetical protein                                            | 100 | 97  |
| BMA2885 | hypothetical protein                                            | 100 | 96  |
| BMA2892 | hypothetical protein                                            | 100 | 96  |
| BMA2898 | IS407A, transposase OrfA                                        | 100 | 98  |
| BMA2899 | IS407A, transposase OrfB                                        | 100 | 99  |
| BMA2912 | ISBma2, transposase                                             | 100 | 100 |
| BMA2925 | conserved hypothetical protein                                  | 100 | 100 |
| BMA2939 | conserved hypothetical protein                                  | 100 | 99  |
| BMA2960 | conserved hypothetical protein, authentic frameshift            | 100 | 96  |
| BMA2964 | hypothetical protein                                            | 100 | 100 |
| BMA2969 | transcriptional regulator, TetR family                          | 100 | 99  |
| BMA2973 | oxidoreductase, FAD-binding, degenerate                         | 100 | 96  |
| BMA2979 | acyltransferase family protein                                  | 100 | 99  |
| BMA2982 | ISBma2, transposase                                             | 100 | 100 |
| BMA2985 | hypothetical protein                                            | 100 | 96  |
| BMA2990 | conserved hypothetical protein                                  | 97  | 95  |
| BMA2999 | hypothetical protein                                            | 100 | 100 |
| BMA3000 | conserved hypothetical protein                                  | 100 | 99  |
| BMA3001 | membrane protein, putative                                      | 100 | 99  |
| BMA3006 | IS407A, transposase OrfB                                        | 100 | 99  |
| BMA3007 | IS407A, transposase OrfA                                        | 100 | 98  |
| BMA3019 | lipoprotein, putative                                           | 100 | 98  |
| BMA3024 | conserved hypothetical protein                                  | 100 | 98  |
| BMA3025 | IS407A, transposase OrfA                                        | 100 | 98  |
| BMA3026 | IS407A, transposase OrfB                                        | 100 | 99  |
| BMA3033 | mdcG protein                                                    | 100 | 99  |
| BMA3045 | conserved hypothetical protein                                  | 100 | 100 |
| BMA3050 | transcriptional regulator, GntR family                          | 100 | 99  |
| BMA3052 | nitrite/sulfite reductase family protein                        | 100 | 99  |
| BMA3053 | conserved hypothetical protein                                  | 100 | 100 |
| BMA3057 | conserved hypothetical protein                                  | 100 | 100 |
| BMA3058 | carotenoid 9,10-9',10' cleavage dioxygenase, putative           | 100 | 100 |
| BMA3059 | glucosamine--fructose-6-phosphate aminotransferase, isomerizing | 100 | 99  |
| BMA3060 | transcriptional regulator, AsnC family                          | 100 | 97  |
| BMA3061 | transcriptional regulator, GntR family                          | 100 | 99  |
| BMA3067 | hypothetical protein                                            | 100 | 98  |
| BMA3068 | hypothetical protein                                            | 100 | 99  |
| BMA3077 | Ser/Thr protein phosphatase family protein                      | 100 | 95  |
| BMA3079 | conserved hypothetical protein                                  | 100 | 100 |
| BMA3080 | membrane protein, putative                                      | 100 | 100 |
| BMA3086 | conserved domain protein                                        | 100 | 95  |
| BMA3087 | conserved hypothetical protein                                  | 100 | 99  |
| BMA3088 | conserved hypothetical protein                                  | 100 | 95  |
| BMA3091 | IS407A, transposase OrfB                                        | 100 | 99  |
| BMA3092 | IS407A, transposase OrfA                                        | 100 | 98  |
| BMA3134 | acetyltransferase, GNAT family                                  | 100 | 98  |
| BMA3139 | ISBma2, transposase                                             | 100 | 99  |
| BMA3146 | conserved hypothetical protein                                  | 100 | 100 |
| BMA3147 | major facilitator family transporter                            | 100 | 99  |

|           |                                                  |     |     |
|-----------|--------------------------------------------------|-----|-----|
| BMA3148   | fatty acid desaturase family protein             | 100 | 99  |
| BMA3149   | diaminobutyrate--2-oxoglutarate aminotransferase | 100 | 100 |
| BMA3150   | hypothetical protein                             | 100 | 98  |
| BMA3151   | ABC transporter, permease protein, putative      | 100 | 99  |
| BMA3152   | ABC transporter, ATP-binding protein             | 100 | 100 |
| BMA3153   | syringomycin synthesis regulator SyrP, putative  | 100 | 99  |
| BMA3154   | conserved hypothetical protein                   | 100 | 100 |
| BMA3155   | citrate synthase-related protein                 | 100 | 99  |
| BMA3156   | acyl-CoA dehydrogenase domain protein            | 100 | 99  |
| BMA3157   | hypothetical protein                             | 100 | 99  |
| BMA3158   | AMP-binding domain protein                       | 100 | 99  |
| BMA3159   | pyridoxal-dependent decarboxylase family protein | 100 | 99  |
| BMA3160   | hypothetical protein                             | 100 | 99  |
| BMA3161   | conserved hypothetical protein                   | 100 | 100 |
| BMA3162   | hypothetical protein                             | 100 | 99  |
| BMA3163   | hypothetical protein                             | 100 | 100 |
| BMA3164   | hypothetical protein                             | 100 | 100 |
| BMA3164.1 | hypothetical protein                             | 100 | 98  |
| BMA3166   | AMP-binding domain protein                       | 100 | 99  |
| BMA3167   | transcriptional regulator, LysR family           | 100 | 100 |
| BMA3173.2 | hypothetical protein                             | 100 | 96  |
| BMA3182   | ISBma2, transposase                              | 100 | 100 |
| BMA3216   | ISBma2, transposase                              | 100 | 99  |
| BMA3222   | acetyltransferase, GNAT family                   | 100 | 98  |
| BMA3224   | conserved hypothetical protein                   | 100 | 98  |
| BMA3236   | hypothetical protein                             | 100 | 99  |
| BMA3239   | ISBma2, transposase                              | 100 | 100 |
| BMA3249.1 | hypothetical protein                             | 100 | 100 |
| BMA3265   | hypothetical protein                             | 100 | 97  |
| BMA3276   | flagellar hook-length control protein            | 100 | 98  |
| BMA3285   | hypothetical protein                             | 100 | 96  |
| BMA3291   | ISBma2, transposase                              | 100 | 100 |
| BMA3293   | threonine efflux protein, putative               | 100 | 99  |
| BMA3295   | hypothetical protein                             | 100 | 98  |
| BMA3295.1 | hypothetical protein                             | 100 | 100 |
| BMA3319   | RebB protein, putative                           | 100 | 100 |
| BMA3344   | conserved hypothetical protein, degenerate       | 100 | 95  |
| BMA3351   | IS407A, transposase OrfB                         | 100 | 99  |
| BMA3352   | IS407A, transposase OrfA                         | 100 | 100 |
| BMA3354.1 | hypothetical protein                             | 100 | 95  |
| BMA3354.2 | hypothetical protein                             | 100 | 98  |
| BMA3361   | ISBma2, transposase                              | 100 | 100 |
| BMA3363.1 | hypothetical protein                             | 100 | 96  |
| BMA3366   | heavy-metal-associated domain protein            | 100 | 100 |
| BMA3374   | outer membrane efflux protein                    | 100 | 99  |
| BMA3375   | efflux transporter, RND family, MFP subunit      | 100 | 99  |
| BMA3376   | heavy metal efflux pump, CzcA family             | 100 | 99  |
| BMA3377   | conserved hypothetical protein                   | 100 | 100 |
| BMA3378   | streptavidin,putative                            | 100 | 100 |

|            |                                                               |     |     |
|------------|---------------------------------------------------------------|-----|-----|
| BMA3383    | conserved domain protein                                      | 100 | 98  |
| BMA3385.1  | hypothetical protein                                          | 99  | 100 |
| BMA3390.1  | hypothetical protein                                          | 100 | 100 |
| BMA3393    | IS407A, transposase OrfA                                      | 100 | 98  |
| BMA3394    | IS407A, transposase OrfB                                      | 100 | 99  |
| BMAA0020   | hypothetical protein                                          | 100 | 98  |
| BMAA0023   | cytochrome P450-related protein                               | 100 | 100 |
| BMAA0026   | hypothetical protein                                          | 100 | 99  |
| BMAA0028   | hypothetical protein                                          | 100 | 99  |
| BMAA0033   | hypothetical protein                                          | 100 | 99  |
| BMAA0036   | gluconolactonase, putative                                    | 100 | 100 |
| BMAA0037   | hypothetical protein                                          | 100 | 97  |
| BMAA0053   | membrane protein, putative                                    | 100 | 100 |
| BMAA0054   | conserved domain protein                                      | 100 | 100 |
| BMAA0057   | hypothetical protein                                          | 100 | 95  |
| BMAA0059   | conserved hypothetical protein                                | 100 | 98  |
| BMAA0060   | conserved hypothetical protein                                | 100 | 98  |
| BMAA0061   | RNA polymerase sigma-70 factor, ECF subfamily                 | 100 | 99  |
| BMAA0064   | conserved hypothetical protein                                | 100 | 97  |
| BMAA0065   | hypothetical protein                                          | 98  | 98  |
| BMAA0066   | hypothetical protein                                          | 100 | 97  |
| BMAA0067   | hypothetical protein                                          | 100 | 97  |
| BMAA0068   | H-NS histone family protein                                   | 100 | 100 |
| BMAA0069   | alpha-ketoglutarate permease                                  | 100 | 99  |
| BMAA0071   | C4-dicarboxylate transport transcriptional regulatory protein | 100 | 99  |
| BMAA0072   | hypothetical protein                                          | 100 | 98  |
| BMAA0073   | hypothetical protein                                          | 100 | 97  |
| BMAA0077   | transcriptional regulator, AraC family                        | 100 | 97  |
| BMAA0078   | hypothetical protein                                          | 100 | 98  |
| BMAA0080   | hypothetical protein                                          | 100 | 98  |
| BMAA0082   | IS407A, transposase OrfA                                      | 100 | 97  |
| BMAA0083   | IS407A, transposase OrfB                                      | 100 | 99  |
| BMAA0084   | ISBma2, transposase, truncation                               | 100 | 98  |
| BMAA0088   | hypothetical protein                                          | 100 | 98  |
| BMAA0090   | lipoprotein, putative                                         | 100 | 96  |
| BMAA0091   | hypothetical protein                                          | 100 | 98  |
| BMAA0092   | hypothetical protein                                          | 100 | 98  |
| BMAA0094   | hypothetical protein                                          | 100 | 100 |
| BMAA0095   | hypothetical protein                                          | 100 | 98  |
| BMAA0098   | hypothetical protein                                          | 100 | 96  |
| BMAA0103   | hypothetical protein                                          | 98  | 96  |
| BMAA0105   | IS407A, transposase OrfB                                      | 100 | 99  |
| BMAA0106   | IS407A, transposase OrfA                                      | 100 | 98  |
| BMAA0108   | conserved hypothetical protein                                | 100 | 95  |
| BMAA0111   | hypothetical protein                                          | 100 | 97  |
| BMAA0112   | hypothetical protein                                          | 100 | 98  |
| BMAA0113   | hypothetical protein                                          | 100 | 99  |
| BMAA0124.1 | ATP synthase gene 1, putative                                 | 100 | 97  |
| BMAA0130   | ATP synthase F1, alpha subunit                                | 100 | 98  |

|          |                                                                  |     |     |
|----------|------------------------------------------------------------------|-----|-----|
| BMAA0133 | hypothetical protein                                             | 100 | 99  |
| BMAA0135 | methyl-accepting chemotaxis protein, putative                    | 100 | 99  |
| BMAA0137 | sensory box histidine kinase/response regulator                  | 100 | 99  |
| BMAA0139 | RND efflux system, cytoplasmic membrane extrusion protein        | 100 | 98  |
| BMAA0142 | transcriptional regulator, TetR family                           | 100 | 99  |
| BMAA0143 | hypothetical protein                                             | 100 | 98  |
| BMAA0153 | adenylylsulfate kinase                                           | 100 | 98  |
| BMAA0156 | hypothetical protein                                             | 100 | 96  |
| BMAA0159 | hypothetical protein                                             | 100 | 98  |
| BMAA0162 | hypothetical protein                                             | 100 | 100 |
| BMAA0165 | hypothetical protein                                             | 100 | 98  |
| BMAA0170 | ISBma2, transposase                                              | 100 | 99  |
| BMAA0171 | hypothetical protein                                             | 100 | 100 |
| BMAA0174 | IS407A, transposase OrfB                                         | 100 | 99  |
| BMAA0175 | IS407A, transposase OrfA                                         | 100 | 97  |
| BMAA0177 | BNR/Asp-box repeat protein                                       | 100 | 99  |
| BMAA0179 | membrane protein, putative                                       | 100 | 99  |
| BMAA0182 | hypothetical protein                                             | 100 | 100 |
| BMAA0189 | conserved hypothetical protein                                   | 100 | 99  |
| BMAA0190 | transcriptional regulator, LysR family, authentic point mutation | 100 | 99  |
| BMAA0193 | hypothetical protein                                             | 100 | 97  |
| BMAA0214 | conserved hypothetical protein                                   | 100 | 97  |
| BMAA0215 | hypothetical protein                                             | 100 | 99  |
| BMAA0219 | CheR methyltransferase, SAM binding/TPR domain protein           | 100 | 99  |
| BMAA0221 | chemotaxis sensor histidine kinase, putative                     | 100 | 99  |
| BMAA0234 | hypothetical protein                                             | 100 | 98  |
| BMAA0235 | dyp-type peroxidase family protein                               | 100 | 98  |
| BMAA0237 | hypothetical protein                                             | 100 | 100 |
| BMAA0238 | hypothetical protein                                             | 100 | 98  |
| BMAA0254 | hypothetical protein                                             | 100 | 96  |
| BMAA0255 | lipoprotein, putative                                            | 100 | 100 |
| BMAA0258 | hypothetical protein                                             | 100 | 95  |
| BMAA0262 | conserved hypothetical protein                                   | 100 | 97  |
| BMAA0267 | hypothetical protein                                             | 100 | 97  |
| BMAA0273 | hypothetical protein                                             | 100 | 95  |
| BMAA0275 | IS407A, transposase OrfA                                         | 100 | 98  |
| BMAA0276 | IS407A, transposase OrfB                                         | 100 | 99  |
| BMAA0278 | hypothetical protein                                             | 100 | 97  |
| BMAA0282 | conserved hypothetical protein                                   | 100 | 98  |
| BMAA0293 | hypothetical protein                                             | 100 | 98  |
| BMAA0296 | hypothetical protein                                             | 100 | 98  |
| BMAA0305 | hypothetical protein                                             | 100 | 97  |
| BMAA0312 | hypothetical protein                                             | 100 | 100 |
| BMAA0313 | conserved hypothetical protein, point mutation                   | 100 | 99  |
| BMAA0314 | hypothetical protein                                             | 100 | 98  |
| BMAA0316 | conserved hypothetical protein                                   | 100 | 99  |
| BMAA0317 | membrane protein, putative                                       | 100 | 98  |
| BMAA0322 | hypothetical protein                                             | 100 | 96  |
| BMAA0332 | ISBma2, transposase                                              | 100 | 99  |

|            |                                                            |     |     |
|------------|------------------------------------------------------------|-----|-----|
| BMAA0341   | IS407A, transposase OrfA, truncation                       | 100 | 100 |
| BMAA0342   | IS407A, transposase OrfB                                   | 100 | 99  |
| BMAA0344   | hypothetical protein                                       | 100 | 100 |
| BMAA0346   | lipoprotein, putative                                      | 100 | 98  |
| BMAA0347   | hypothetical protein                                       | 100 | 100 |
| BMAA0357   | hypothetical protein                                       | 100 | 95  |
| BMAA0359   | hypothetical protein                                       | 100 | 97  |
| BMAA0361   | hypothetical protein                                       | 100 | 98  |
| BMAA0364   | conserved hypothetical protein                             | 100 | 95  |
| BMAA0366   | hypothetical protein                                       | 100 | 98  |
| BMAA0371   | hypothetical protein                                       | 100 | 97  |
| BMAA0372   | hypothetical protein                                       | 100 | 100 |
| BMAA0374   | L-lactate dehydrogenase                                    | 100 | 100 |
| BMAA0375   | transcriptional regulator, LysR family                     | 100 | 99  |
| BMAA0377   | hypothetical protein                                       | 100 | 99  |
| BMAA0378   | hypothetical protein                                       | 100 | 97  |
| BMAA0379   | cysteine desulfurase                                       | 100 | 99  |
| BMAA0380   | major facilitator family transporter                       | 100 | 100 |
| BMAA0381   | metallo-beta-lactamase family protein                      | 100 | 99  |
| BMAA0382   | transcriptional regulator, ArsR family                     | 100 | 99  |
| BMAA0383   | hypothetical protein                                       | 100 | 97  |
| BMAA0384   | conserved hypothetical protein                             | 100 | 98  |
| BMAA0389   | hypothetical protein                                       | 100 | 97  |
| BMAA0390   | hypothetical protein                                       | 100 | 98  |
| BMAA0393   | FHA domain protein                                         | 100 | 98  |
| BMAA0400.1 | serine/threonine protein kinase                            | 100 | 98  |
| BMAA0408   | conserved hypothetical protein                             | 100 | 97  |
| BMAA0413   | IS407A, transposase OrfB                                   | 100 | 99  |
| BMAA0414   | IS407A, transposase OrfA                                   | 100 | 98  |
| BMAA0426   | hypothetical protein                                       | 100 | 100 |
| BMAA0436   | IS407A, transposase OrfB                                   | 100 | 99  |
| BMAA0437   | IS407A, transposase OrfA                                   | 100 | 98  |
| BMAA0456   | hypothetical protein                                       | 100 | 98  |
| BMAA0458   | hypothetical protein                                       | 100 | 98  |
| BMAA0465   | levanase                                                   | 100 | 99  |
| BMAA0470   | hypothetical protein                                       | 100 | 98  |
| BMAA0497   | IS407A, transposase OrfB                                   | 100 | 99  |
| BMAA0498   | IS407A, transposase OrfA                                   | 100 | 98  |
| BMAA0506   | hypothetical protein                                       | 97  | 96  |
| BMAA0511   | hypothetical protein                                       | 100 | 100 |
| BMAA0512   | glycerophosphoryl diester phosphodiesterase family protein | 100 | 99  |
| BMAA0513   | conserved hypothetical protein, authentic frameshift       | 100 | 95  |
| BMAA0514   | hypothetical protein                                       | 100 | 97  |
| BMAA0516   | transcriptional regulator, putative                        | 100 | 100 |
| BMAA0517   | NADH-quinone oxidoreductase, B subunit                     | 100 | 100 |
| BMAA0518   | hypothetical protein                                       | 100 | 95  |
| BMAA0520   | hypothetical protein                                       | 100 | 98  |
| BMAA0522   | hypothetical protein                                       | 100 | 100 |
| BMAA0523   | lipoprotein, putative                                      | 100 | 97  |

|            |                                                                                 |     |     |
|------------|---------------------------------------------------------------------------------|-----|-----|
| BMAA0537   | hypothetical protein                                                            | 99  | 100 |
| BMAA0542   | beta-ketoacyl CoA thiolase                                                      | 100 | 99  |
| BMAA0548   | hypothetical protein                                                            | 100 | 97  |
| BMAA0551   | IS407A, transposase OrfA                                                        | 100 | 98  |
| BMAA0552   | IS407A, transposase OrfB                                                        | 100 | 99  |
| BMAA0553   | Ser/Thr protein phosphatase family protein                                      | 100 | 99  |
| BMAA0555   | IS407A, transposase OrfB                                                        | 100 | 99  |
| BMAA0556   | IS407A, transposase OrfA                                                        | 100 | 98  |
| BMAA0559   | conserved hypothetical protein                                                  | 100 | 100 |
| BMAA0563   | NADPH-dependent FMN reductase family protein                                    | 100 | 98  |
| BMAA0568   | conserved hypothetical protein                                                  | 100 | 100 |
| BMAA0568.1 | hypothetical protein                                                            | 100 | 98  |
| BMAA0580   | conserved hypothetical protein                                                  | 100 | 99  |
| BMAA0581   | hypothetical protein                                                            | 100 | 97  |
| BMAA0582   | conserved domain protein                                                        | 100 | 99  |
| BMAA0583   | IS407A, transposase OrfA                                                        | 100 | 98  |
| BMAA0584   | IS407A, transposase OrfB                                                        | 100 | 99  |
| BMAA0585   | secretory lipase family protein                                                 | 99  | 99  |
| BMAA0586   | hypothetical protein                                                            | 100 | 100 |
| BMAA0587   | outer membrane porin, putative                                                  | 100 | 100 |
| BMAA0588   | hypothetical protein                                                            | 100 | 95  |
| BMAA0594   | hypothetical protein                                                            | 100 | 98  |
| BMAA0598   | hypothetical protein                                                            | 100 | 98  |
| BMAA0600   | glyoxalase family protein                                                       | 100 | 99  |
| BMAA0604   | membrane protein                                                                | 100 | 100 |
| BMAA0605   | conserved hypothetical protein                                                  | 100 | 99  |
| BMAA0606   | oxidoreductase, short-chain dehydrogenase/reductase family                      | 100 | 99  |
| BMAA0607   | transcriptional regulator, GntR family                                          | 100 | 99  |
| BMAA0608   | voltage gated chloride channel family protein                                   | 100 | 99  |
| BMAA0609   | hypothetical protein                                                            | 100 | 99  |
| BMAA0613   | hypothetical protein                                                            | 100 | 96  |
| BMAA0614   | conserved domain protein                                                        | 100 | 98  |
| BMAA0616   | hypothetical protein                                                            | 100 | 98  |
| BMAA0617   | hypothetical protein                                                            | 100 | 96  |
| BMAA0618   | hypothetical protein                                                            | 100 | 100 |
| BMAA0619   | transcriptional regulator, MarR family                                          | 100 | 100 |
| BMAA0621   | arabinose ABC transporter, permease protein, putative, authentic frameshift     | 100 | 98  |
| BMAA0625   | conserved hypothetical protein                                                  | 100 | 100 |
| BMAA0626   | hypothetical protein                                                            | 99  | 99  |
| BMAA0628   | hypothetical protein                                                            | 100 | 97  |
| BMAA0629   | p-hydroxycinnamoyl CoA hydratase/lyase                                          | 100 | 99  |
| BMAA0630   | aldehyde dehydrogenase (NADP) family protein                                    | 100 | 100 |
| BMAA0632   | 3-hydroxyphenylpropionic acid transporter                                       | 100 | 100 |
| BMAA0633   | outer membrane porin, putative                                                  | 100 | 98  |
| BMAA0634   | chlorogenate esterase                                                           | 100 | 99  |
| BMAA0640   | D-galactarate dehydratase/altronate dehydratase, putative, authentic frameshift | 100 | 99  |
| BMAA0646   | hypothetical protein                                                            | 100 | 97  |
| BMAA0647   | IS407A, transposase OrfB                                                        | 100 | 99  |
| BMAA0648   | IS407A, transposase OrfA                                                        | 100 | 98  |

|            |                                                          |     |     |
|------------|----------------------------------------------------------|-----|-----|
| BMAA0651   | H-NS histone family protein                              | 100 | 99  |
| BMAA0652   | transcriptional regulator, IclR family                   | 100 | 99  |
| BMAA0653   | hypothetical protein                                     | 100 | 99  |
| BMAA0654   | EAL domain protein                                       | 100 | 99  |
| BMAA0655   | hypothetical protein                                     | 100 | 100 |
| BMAA0656   | hypothetical protein                                     | 100 | 97  |
| BMAA0657   | hypothetical protein                                     | 100 | 100 |
| BMAA0661   | hypothetical protein                                     | 100 | 96  |
| BMAA0663   | hypothetical protein                                     | 99  | 96  |
| BMAA0664   | EAL/GGDEF domain protein                                 | 100 | 99  |
| BMAA0669   | hypothetical protein                                     | 100 | 98  |
| BMAA0670   | hypothetical protein                                     | 100 | 98  |
| BMAA0671   | acetyltransferase, GNAT family                           | 100 | 97  |
| BMAA0673.1 | hypothetical protein                                     | 100 | 97  |
| BMAA0673.2 | hypothetical protein                                     | 100 | 98  |
| BMAA0676   | hypothetical protein                                     | 100 | 96  |
| BMAA0680   | penicillin-binding protein                               | 100 | 97  |
| BMAA0684   | hypothetical protein                                     | 100 | 96  |
| BMAA0685   | hypothetical protein                                     | 100 | 100 |
| BMAA0687   | conserved domain protein                                 | 100 | 99  |
| BMAA0688   | hypothetical protein                                     | 100 | 100 |
| BMAA0689   | hypothetical protein                                     | 100 | 100 |
| BMAA0690   | dioxygenase, TauD/TfdA family                            | 100 | 99  |
| BMAA0691   | conserved domain protein                                 | 100 | 100 |
| BMAA0692   | isopenicillin N epimerase, putative                      | 100 | 100 |
| BMAA0697   | hypothetical protein                                     | 100 | 96  |
| BMAA0699.1 | hypothetical protein                                     | 100 | 98  |
| BMAA0703   | DNA-binding response regulator, LuxR family              | 100 | 100 |
| BMAA0704   | hypothetical protein                                     | 100 | 100 |
| BMAA0715   | conserved hypothetical protein                           | 100 | 99  |
| BMAA0718   | hypothetical protein                                     | 100 | 97  |
| BMAA0721   | acyl-CoA dehydrogenase domain protein                    | 100 | 99  |
| BMAA0722   | conserved hypothetical protein                           | 100 | 99  |
| BMAA0724   | IS407A, transposase OrfB                                 | 100 | 99  |
| BMAA0725   | IS407A, transposase OrfA                                 | 100 | 98  |
| BMAA0726   | transposase, degenerate                                  | 100 | 98  |
| BMAA0727   | GTP cyclohydrolase I                                     | 100 | 99  |
| BMAA0728   | hypothetical protein                                     | 100 | 97  |
| BMAA0729   | hypothetical protein                                     | 99  | 98  |
| BMAA0733   | conserved hypothetical protein                           | 100 | 99  |
| BMAA0735   | conserved hypothetical protein                           | 100 | 98  |
| BMAA0736   | pentapeptide repeat family protein, authentic frameshift | 100 | 98  |
| BMAA0738   | ATP-dependent Clp protease, ATP-binding subunit ClpB     | 100 | 98  |
| BMAA0741   | conserved hypothetical protein                           | 100 | 99  |
| BMAA0742   | conserved hypothetical protein                           | 100 | 99  |
| BMAA0747   | conserved hypothetical protein                           | 100 | 95  |
| BMAA0748   | hypothetical protein                                     | 100 | 98  |
| BMAA0751   | N-acetylmuramoyl-L-alanine amidase domain protein        | 100 | 100 |
| BMAA0752   | hypothetical protein                                     | 100 | 97  |



|            |                                                                                       |     |     |
|------------|---------------------------------------------------------------------------------------|-----|-----|
| BMAA0761   | hypothetical protein                                                                  | 100 | 95  |
| BMAA0764   | IS1356, transposase, degenerate                                                       | 100 | 95  |
| BMAA0765   | oxidoreductase, zinc-binding dehydrogenase family                                     | 100 | 100 |
| BMAA0766   | starvation sensing protein RspA                                                       | 100 | 99  |
| BMAA0767   | transcriptional regulator, GntRfamily                                                 | 100 | 99  |
| BMAA0768   | mannitol dehydrogenase family protein                                                 | 100 | 99  |
| BMAA0769   | sugar transporter, putative                                                           | 100 | 96  |
| BMAA0780   | ApbE family protein                                                                   | 100 | 97  |
| BMAA0786   | hypothetical protein                                                                  | 100 | 98  |
| BMAA0791   | hypothetical protein                                                                  | 100 | 99  |
| BMAA0792   | conserved domain protein                                                              | 100 | 100 |
| BMAA0793   | jmjC domain protein                                                                   | 100 | 98  |
| BMAA0794   | conserved hypothetical protein                                                        | 100 | 99  |
| BMAA0795   | iron-sulfur cluster-binding protein, rieske family/carboxynorspermidine decarboxylase | 100 | 98  |
| BMAA0796   | hypothetical protein                                                                  | 100 | 97  |
| BMAA0797   | hypothetical protein                                                                  | 100 | 96  |
| BMAA0798   | multicopper oxidase domain protein                                                    | 100 | 99  |
| BMAA0800   | conserved domain protein, authentic frameshift                                        | 100 | 95  |
| BMAA0811   | IS407A, transposase OrfB                                                              | 100 | 99  |
| BMAA0812   | IS407A, transposase OrfA                                                              | 100 | 98  |
| BMAA0821   | HD domain protein                                                                     | 100 | 99  |
| BMAA0823   | hypothetical protein                                                                  | 100 | 100 |
| BMAA0824   | conserved hypothetical protein, authentic frameshift                                  | 97  | 95  |
| BMAA0832   | hypothetical protein                                                                  | 100 | 99  |
| BMAA0837   | conserved hypothetical protein                                                        | 100 | 99  |
| BMAA0840   | hypothetical protein                                                                  | 100 | 99  |
| BMAA0841   | conserved hypothetical protein, degenerate                                            | 98  | 97  |
| BMAA0842   | hypothetical protein                                                                  | 100 | 96  |
| BMAA0845   | IS407A, transposase OrfB                                                              | 100 | 99  |
| BMAA0846   | IS407A, transposase OrfA                                                              | 100 | 98  |
| BMAA0853   | hypothetical protein                                                                  | 100 | 96  |
| BMAA0866   | hypothetical protein                                                                  | 100 | 97  |
| BMAA0869   | IS407A, transposase OrfB                                                              | 100 | 99  |
| BMAA0870   | IS407A, transposase OrfA                                                              | 100 | 98  |
| BMAA0872   | ISBma2, transposase                                                                   | 100 | 99  |
| BMAA0873   | hypothetical protein                                                                  | 100 | 99  |
| BMAA0878   | ISBma2, transposase                                                                   | 100 | 99  |
| BMAA0886   | IS407A, transposase OrfA                                                              | 100 | 98  |
| BMAA0887   | IS407A, transposase OrfB                                                              | 100 | 99  |
| BMAA0890   | IS407A, transposase OrfB                                                              | 100 | 99  |
| BMAA0891   | IS407A, transposase OrfA                                                              | 100 | 98  |
| BMAA0897   | hypothetical protein                                                                  | 100 | 99  |
| BMAA0898   | hypothetical protein                                                                  | 100 | 100 |
| BMAA0900   | hypothetical protein                                                                  | 100 | 100 |
| BMAA0900.1 | hypothetical protein                                                                  | 100 | 100 |
| BMAA0904   | lipoprotein, putative                                                                 | 100 | 95  |
| BMAA0905   | hypothetical protein                                                                  | 100 | 99  |
| BMAA0906   | glyoxylate reductase                                                                  | 100 | 100 |
| BMAA0911   | major facilitator family transporter                                                  | 100 | 99  |

|          |                                                    |     |     |
|----------|----------------------------------------------------|-----|-----|
| BMAA0913 | hypothetical protein                               | 100 | 98  |
| BMAA0917 | IS407A, transposase OrfA                           | 100 | 98  |
| BMAA0918 | IS407A, transposase OrfB                           | 100 | 99  |
| BMAA0920 | hypothetical protein                               | 100 | 97  |
| BMAA0929 | rhodanese-like domain protein                      | 100 | 99  |
| BMAA0930 | serine O-acetyltransferase, putative               | 100 | 99  |
| BMAA0931 | DNA-binding protein                                | 100 | 100 |
| BMAA0932 | conserved hypothetical protein                     | 100 | 100 |
| BMAA0933 | cysteine desulfurase, putative                     | 100 | 99  |
| BMAA0935 | hypothetical protein                               | 100 | 98  |
| BMAA0936 | hypothetical protein                               | 100 | 99  |
| BMAA0945 | di-haem cytochrome c peroxidase family protein     | 100 | 99  |
| BMAA0948 | major facilitator family transporter               | 100 | 99  |
| BMAA0953 | hypothetical protein                               | 100 | 99  |
| BMAA0954 | transcriptional regulator, AraC family             | 100 | 99  |
| BMAA0955 | hypothetical protein                               | 100 | 95  |
| BMAA0957 | conserved hypothetical protein                     | 100 | 100 |
| BMAA0958 | conserved hypothetical protein                     | 100 | 96  |
| BMAA0959 | glycolate oxidase, subunit GlcD, putative          | 100 | 99  |
| BMAA0961 | alanyl-tRNA synthetase-related protein             | 100 | 99  |
| BMAA0962 | membrane protein, putative                         | 100 | 99  |
| BMAA0963 | isoleucyl-tRNA synthetase                          | 100 | 99  |
| BMAA0964 | hypothetical protein                               | 100 | 96  |
| BMAA0969 | hypothetical protein                               | 100 | 100 |
| BMAA0983 | hypothetical protein                               | 100 | 99  |
| BMAA0991 | IS407A, transposase OrfA                           | 100 | 98  |
| BMAA0992 | IS407A, transposase OrfB                           | 100 | 99  |
| BMAA0993 | ATP-dependent helicase, DEAD/DEAH family           | 100 | 99  |
| BMAA0994 | hypothetical protein                               | 100 | 99  |
| BMAA0999 | hypothetical protein                               | 100 | 97  |
| BMAA1004 | IS407A, transposase OrfA                           | 100 | 98  |
| BMAA1005 | IS407A, transposase OrfB                           | 100 | 99  |
| BMAA1007 | transcriptional regulator, TetR family             | 100 | 100 |
| BMAA1008 | protoporphyrinogen oxidase, putative               | 100 | 100 |
| BMAA1009 | membrane protein                                   | 100 | 98  |
| BMAA1011 | hypothetical protein                               | 100 | 100 |
| BMAA1013 | RNA polymerase sigma-70 factor, ECF subfamily      | 100 | 100 |
| BMAA1014 | hypothetical protein                               | 100 | 98  |
| BMAA1016 | AMP-binding domain protein                         | 100 | 99  |
| BMAA1017 | acyl-CoA dehydrogenase domain protein              | 100 | 99  |
| BMAA1018 | acyl-CoA dehydrogenase domain protein              | 100 | 98  |
| BMAA1019 | phosphopantetheine attachment site domain protein  | 100 | 98  |
| BMAA1020 | conserved hypothetical protein                     | 100 | 99  |
| BMAA1021 | thio-template mechanism natural product synthetase | 99  | 98  |
| BMAA1022 | polyketide synthase, putative                      | 100 | 99  |
| BMAA1023 | IS407A, transposase OrfB                           | 100 | 99  |
| BMAA1024 | IS407A, transposase OrfA                           | 100 | 98  |
| BMAA1025 | hypothetical protein                               | 100 | 96  |
| BMAA1026 | hypothetical protein                               | 100 | 97  |

|            |                                                           |     |     |
|------------|-----------------------------------------------------------|-----|-----|
| BMAA1031   | heavy metal resistance protein CzcC                       | 100 | 99  |
| BMAA1032   | hypothetical protein                                      | 100 | 100 |
| BMAA1033   | hypothetical protein                                      | 100 | 100 |
| BMAA1034   | hypothetical protein                                      | 100 | 99  |
| BMAA1041   | hypothetical protein                                      | 100 | 98  |
| BMAA1047   | hypothetical protein                                      | 100 | 97  |
| BMAA1054   | IS407A, transposase OrfB                                  | 100 | 99  |
| BMAA1055   | IS407A, transposase OrfA                                  | 100 | 98  |
| BMAA1061   | hypothetical protein                                      | 100 | 98  |
| BMAA1065   | conserved hypothetical protein, degenerate                | 100 | 96  |
| BMAA1066   | conserved hypothetical protein                            | 100 | 100 |
| BMAA1067   | transporter, CorA family                                  | 100 | 100 |
| BMAA1068   | hypothetical protein                                      | 100 | 100 |
| BMAA1071   | conserved hypothetical protein                            | 100 | 100 |
| BMAA1072   | hypothetical protein                                      | 100 | 100 |
| BMAA1080   | hypothetical protein                                      | 100 | 96  |
| BMAA1081   | D-alanyl-D-alanine carboxypeptidase family protein        | 100 | 99  |
| BMAA1082   | penicillin-binding protein                                | 100 | 99  |
| BMAA1088   | hypothetical protein                                      | 99  | 99  |
| BMAA1092   | GTP cyclohydrolase I                                      | 100 | 98  |
| BMAA1093.1 | hypothetical protein                                      | 100 | 100 |
| BMAA1095   | hypothetical protein                                      | 100 | 99  |
| BMAA1097   | hypothetical protein                                      | 100 | 95  |
| BMAA1105   | CoA transferase, CAIB/BAIF family                         | 100 | 99  |
| BMAA1106   | oxidoreductase, zinc-binding dehydrogenase family protein | 100 | 100 |
| BMAA1107   | alcohol dehydrogenase, iron-containing                    | 100 | 100 |
| BMAA1110   | hypothetical protein                                      | 100 | 98  |
| BMAA1111   | hypothetical protein                                      | 100 | 99  |
| BMAA1113   | conserved hypothetical protein                            | 100 | 98  |
| BMAA1114   | conserved hypothetical protein                            | 100 | 98  |
| BMAA1117   | nonribosomal peptide synthetase DhbF                      | 100 | 99  |
| BMAA1118   | mbtH-like protein                                         | 100 | 100 |
| BMAA1119   | multidrug resistance protein                              | 100 | 100 |
| BMAA1120   | non-ribosomal peptide synthase, putative                  | 100 | 99  |
| BMAA1121   | ISBma2, transposase                                       | 100 | 99  |
| BMAA1132   | oxidoreductase, zinc-binding dehydrogenase family         | 100 | 99  |
| BMAA1133   | transcriptional regulator, AraC family                    | 100 | 98  |
| BMAA1147   | acyl-CoA dehydrogenase domain protein                     | 100 | 99  |
| BMAA1149   | hypothetical protein                                      | 100 | 98  |
| BMAA1151   | conserved hypothetical protein                            | 100 | 100 |
| BMAA1157   | hypothetical protein                                      | 100 | 100 |
| BMAA1160   | hypothetical protein                                      | 100 | 97  |
| BMAA1162   | hypothetical protein                                      | 98  | 96  |
| BMAA1163   | cytochrome c oxidase, subunit III family protein          | 100 | 100 |
| BMAA1164   | membrane protein, putative                                | 100 | 98  |
| BMAA1165   | hypothetical protein                                      | 100 | 98  |
| BMAA1167   | hypothetical protein                                      | 100 | 100 |
| BMAA1172   | hypothetical protein                                      | 100 | 100 |
| BMAA1174   | IS407A, transposase OrfA                                  | 100 | 98  |

|            |                                                                       |     |     |
|------------|-----------------------------------------------------------------------|-----|-----|
| BMAA1175   | IS407A, transposase OrfB                                              | 100 | 99  |
| BMAA1178   | major facilitator family transporter, truncation                      | 100 | 99  |
| BMAA1179   | branched-chain amino acid ABC transporter, permease protein, putative | 100 | 99  |
| BMAA1183   | hypothetical protein                                                  | 100 | 95  |
| BMAA1184   | conserved hypothetical protein                                        | 100 | 98  |
| BMAA1185   | YceI like family protein                                              | 100 | 98  |
| BMAA1186   | conserved hypothetical protein                                        | 100 | 98  |
| BMAA1188   | lipoprotein, putative                                                 | 100 | 100 |
| BMAA1192   | hypothetical protein                                                  | 100 | 98  |
| BMAA1200   | drug resistance transporter, EmrB/QacA family                         | 100 | 98  |
| BMAA1201   | halogenase PrnC                                                       | 100 | 99  |
| BMAA1202   | polyketide synthase, putative, degenerate                             | 100 | 98  |
| BMAA1208   | sodium/hydrogen exchanger                                             | 100 | 99  |
| BMAA1209   | malonyl CoA-acyl carrier protein transacylase                         | 100 | 99  |
| BMAA1211   | hypothetical protein                                                  | 100 | 99  |
| BMAA1212   | polyketide biosynthesis protein, interruption-N                       | 96  | 99  |
| BMAA1214   | polyketide biosynthesis protein, interruption-C                       | 100 | 97  |
| BMAA1215   | polyketide biosynthesis enoyl-CoA hydratase                           | 100 | 100 |
| BMAA1216   | polyketide biosynthesis enoyl-CoA hydratase                           | 100 | 99  |
| BMAA1217   | acyl carrier protein                                                  | 100 | 100 |
| BMAA1218   | polyketide beta-ketoacyl synthase, putative                           | 100 | 99  |
| BMAA1220   | iron-sulfur cluster-binding protein, rieske family                    | 100 | 100 |
| BMAA1221   | transcriptional regulator, AraC family                                | 100 | 100 |
| BMAA1222   | conserved hypothetical protein                                        | 100 | 99  |
| BMAA1223   | catalase                                                              | 100 | 100 |
| BMAA1224   | hypothetical protein                                                  | 100 | 97  |
| BMAA1226   | IS407A, transposase OrfA                                              | 100 | 98  |
| BMAA1227   | IS407A, transposase OrfB                                              | 100 | 99  |
| BMAA1230   | transporter, putative                                                 | 100 | 97  |
| BMAA1231   | hypothetical protein                                                  | 100 | 97  |
| BMAA1234   | hypothetical protein                                                  | 100 | 100 |
| BMAA1235   | conserved domain protein                                              | 100 | 99  |
| BMAA1248.1 | hypothetical protein                                                  | 100 | 98  |
| BMAA1252   | hypothetical protein                                                  | 100 | 99  |
| BMAA1256   | conserved hypothetical protein                                        | 100 | 100 |
| BMAA1264   | hypothetical protein                                                  | 100 | 96  |
| BMAA1266   | YD repeat protein                                                     | 100 | 99  |
| BMAA1269.1 | hypothetical protein                                                  | 100 | 98  |
| BMAA1271   | hypothetical protein                                                  | 100 | 99  |
| BMAA1280   | hypothetical protein                                                  | 100 | 100 |
| BMAA1282   | hypothetical protein                                                  | 100 | 98  |
| BMAA1284   | lipoprotein NlpD, putative                                            | 100 | 99  |
| BMAA1287   | hypothetical protein                                                  | 100 | 96  |
| BMAA1296   | hypothetical protein                                                  | 100 | 98  |
| BMAA1301   | phosphinothricin N-acetyltransferase                                  | 100 | 98  |
| BMAA1304   | hypothetical protein                                                  | 100 | 100 |
| BMAA1307   | IS407A, transposase OrfA                                              | 100 | 98  |
| BMAA1308   | IS407A, transposase OrfB                                              | 100 | 99  |
| BMAA1309   | transposase, degenerate                                               | 100 | 98  |

|            |                                                            |     |     |
|------------|------------------------------------------------------------|-----|-----|
| BMAA1312   | conserved hypothetical protein                             | 100 | 97  |
| BMAA1314   | hypothetical protein                                       | 100 | 99  |
| BMAA1315   | hypothetical protein                                       | 100 | 97  |
| BMAA1316   | hypothetical protein                                       | 100 | 99  |
| BMAA1318   | hypothetical protein                                       | 100 | 95  |
| BMAA1321   | hypothetical protein                                       | 100 | 96  |
| BMAA1357   | acetyltransferase, GNAT family                             | 100 | 97  |
| BMAA1358   | LysE family protein                                        | 100 | 100 |
| BMAA1359   | hypothetical protein                                       | 97  | 95  |
| BMAA1362   | hypothetical protein                                       | 100 | 97  |
| BMAA1371   | conserved domain protein, authentic frameshift             | 100 | 97  |
| BMAA1377   | IS407A, transposase OrfA                                   | 100 | 98  |
| BMAA1378   | IS407A, transposase OrfB                                   | 100 | 99  |
| BMAA1386   | conserved hypothetical protein                             | 100 | 98  |
| BMAA1387   | hypothetical protein                                       | 100 | 99  |
| BMAA1390   | conserved hypothetical protein                             | 100 | 99  |
| BMAA1391   | cellulose synthase, putative                               | 100 | 99  |
| BMAA1392   | RND efflux system, outer membrane lipoprotein, NodT family | 100 | 99  |
| BMAA1395   | cyclic nucleotide-binding domain protein                   | 100 | 96  |
| BMAA1396   | sensor histidine kinase, authentic frameshift              | 100 | 98  |
| BMAA1407   | hypothetical protein                                       | 100 | 98  |
| BMAA1409   | hypothetical protein                                       | 100 | 99  |
| BMAA1410   | membrane protein, putative                                 | 100 | 99  |
| BMAA1411   | IS407A, transposase OrfA                                   | 100 | 98  |
| BMAA1412   | IS407A, transposase OrfB                                   | 100 | 99  |
| BMAA1425   | methylenomycin A resistance protein, putative              | 100 | 96  |
| BMAA1433   | hypothetical protein                                       | 100 | 100 |
| BMAA1434   | hypothetical protein                                       | 100 | 99  |
| BMAA1436.1 | hypothetical protein                                       | 100 | 95  |
| BMAA1438   | ABC transporter, permease protein                          | 100 | 100 |
| BMAA1439   | ABC transporter, ATP-binding protein                       | 100 | 99  |
| BMAA1441   | D-methionine-binding lipoprotein metQ, putative            | 100 | 100 |
| BMAA1442   | hypothetical protein                                       | 100 | 98  |
| BMAA1445   | hypothetical protein                                       | 100 | 95  |
| BMAA1446   | thiotemplate mechanism natural product synthetase          | 100 | 99  |
| BMAA1448   | hypothetical protein                                       | 97  | 96  |
| BMAA1454   | FkbH domain protein                                        | 100 | 99  |
| BMAA1461   | acetyltransferase, GNAT family                             | 100 | 99  |
| BMAA1469   | hypothetical protein                                       | 100 | 96  |
| BMAA1470   | hypothetical protein                                       | 100 | 98  |
| BMAA1476   | conserved hypothetical protein                             | 100 | 100 |
| BMAA1477   | transcriptional regulator, lclR family                     | 100 | 99  |
| BMAA1478   | C4-dicarboxylate anaerobic carrier family protein          | 100 | 97  |
| BMAA1485   | hypothetical protein                                       | 100 | 100 |
| BMAA1486   | O-methyltransferase family protein                         | 100 | 99  |
| BMAA1488   | hypothetical protein                                       | 100 | 99  |
| BMAA1490   | beta-ketoadipyl CoA thiolase                               | 100 | 99  |
| BMAA1493   | major facilitator family transporter                       | 100 | 99  |
| BMAA1494   | hippurate hydrolase                                        | 100 | 100 |

|            |                                                          |     |     |
|------------|----------------------------------------------------------|-----|-----|
| BMAA1495   | transcriptional regulator, LysR family                   | 100 | 100 |
| BMAA1498   | O-antigen acetylase, putative                            | 100 | 99  |
| BMAA1500   | hypothetical protein                                     | 100 | 97  |
| BMAA1503   | IS407A, transposase OrfB                                 | 100 | 99  |
| BMAA1504   | IS407A, transposase OrfA                                 | 100 | 98  |
| BMAA1506   | ISBma2, transposase                                      | 100 | 99  |
| BMAA1507   | hypothetical protein                                     | 97  | 98  |
| BMAA1512   | IS407A, transposase OrfB                                 | 100 | 99  |
| BMAA1513   | IS407A, transposase OrfA                                 | 100 | 98  |
| BMAA1514   | hypothetical protein                                     | 100 | 99  |
| BMAA1515   | hypothetical protein                                     | 100 | 99  |
| BMAA1522   | hypothetical protein                                     | 100 | 97  |
| BMAA1533   | type III secretion system protein BsaZ                   | 100 | 99  |
| BMAA1546   | hypothetical protein                                     | 100 | 98  |
| BMAA1552   | hypothetical protein                                     | 100 | 98  |
| BMAA1553   | hypothetical protein                                     | 100 | 99  |
| BMAA1554   | hypothetical protein                                     | 100 | 98  |
| BMAA1555   | hypothetical protein                                     | 100 | 97  |
| BMAA1556   | transcriptional regulator, putative                      | 100 | 99  |
| BMAA1561   | transcriptional regulator, MarR family                   | 100 | 97  |
| BMAA1562   | conserved hypothetical protein                           | 100 | 98  |
| BMAA1568   | serine protease, kumamolysin                             | 100 | 98  |
| BMAA1574   | AMP-binding enzyme domain protein                        | 100 | 99  |
| BMAA1575   | hypothetical protein                                     | 100 | 100 |
| BMAA1579   | hypothetical protein                                     | 100 | 98  |
| BMAA1586   | cellulose biosynthesis protein, putative                 | 100 | 99  |
| BMAA1587   | conserved domain protein                                 | 100 | 97  |
| BMAA1589   | endo-1,4-D-glucanase                                     | 100 | 98  |
| BMAA1593   | hipA protein                                             | 100 | 99  |
| BMAA1594   | hypothetical protein                                     | 96  | 96  |
| BMAA1595   | hypothetical protein                                     | 100 | 100 |
| BMAA1597.1 | hypothetical protein                                     | 97  | 99  |
| BMAA1601   | hypothetical protein                                     | 100 | 98  |
| BMAA1603   | type IV prepilin                                         | 100 | 96  |
| BMAA1605   | type IV pilus biogenesis protein, putative               | 100 | 99  |
| BMAA1611   | pilL domain protein                                      | 100 | 100 |
| BMAA1612   | twitching motility protein PilT, putative                | 100 | 99  |
| BMAA1613   | type III/III secretion system family protein             | 100 | 96  |
| BMAA1616   | hypothetical protein                                     | 100 | 98  |
| BMAA1617   | hrp protein, putative                                    | 100 | 99  |
| BMAA1618   | conserved hypothetical protein                           | 100 | 99  |
| BMAA1619   | hypothetical protein                                     | 100 | 97  |
| BMAA1620   | hypothetical protein                                     | 99  | 96  |
| BMAA1623   | hypothetical protein                                     | 100 | 98  |
| BMAA1626   | conserved hypothetical protein                           | 100 | 98  |
| BMAA1632   | conserved hypothetical protein                           | 100 | 98  |
| BMAA1633   | HrpB2-like protein                                       | 100 | 100 |
| BMAA1635   | conserved hypothetical protein                           | 100 | 99  |
| BMAA1639   | type III secretion inner membrane protein SctT, putative | 100 | 97  |

|            |                                                                              |     |     |
|------------|------------------------------------------------------------------------------|-----|-----|
| BMAA1640   | hypothetical protein                                                         | 100 | 100 |
| BMAA1641   | conserved hypothetical protein                                               | 100 | 99  |
| BMAA1642   | syringomycin biosynthesis enzyme, putative                                   | 100 | 100 |
| BMAA1643   | peptide synthetase, putative                                                 | 100 | 99  |
| BMAA1644   | IS407A, transposase OrfB                                                     | 100 | 99  |
| BMAA1645   | IS407A, transposase OrfA                                                     | 100 | 98  |
| BMAA1646   | peptide synthetase, putative                                                 | 100 | 99  |
| BMAA1647   | diaminobutyrate--pyruvate aminotransferase/membrane protein, putative        | 100 | 99  |
| BMAA1648   | hypothetical protein                                                         | 100 | 97  |
| BMAA1649   | hypothetical protein                                                         | 100 | 98  |
| BMAA1650   | pyruvate oxidase                                                             | 100 | 99  |
| BMAA1651   | acetyl-CoA hydrolase/transferase family protein                              | 100 | 99  |
| BMAA1652   | MoaC domain protein                                                          | 100 | 100 |
| BMAA1653   | citrate lyase, beta subunit, putative                                        | 100 | 99  |
| BMAA1654   | transcriptional regulator, LysR family                                       | 100 | 99  |
| BMAA1655   | hypothetical protein                                                         | 100 | 100 |
| BMAA1656   | conserved hypothetical protein                                               | 100 | 98  |
| BMAA1659   | conserved hypothetical protein                                               | 100 | 97  |
| BMAA1663   | hypothetical protein                                                         | 100 | 95  |
| BMAA1664.1 | hypothetical protein                                                         | 100 | 99  |
| BMAA1668   | transporter, putative                                                        | 100 | 97  |
| BMAA1671   | transporter, putative                                                        | 100 | 99  |
| BMAA1672   | beta-glucosidase, putative, authentic point mutation                         | 100 | 98  |
| BMAA1673   | hypothetical protein                                                         | 100 | 99  |
| BMAA1674   | amidase, putative, authentic frameshift                                      | 100 | 95  |
| BMAA1675   | conserved hypothetical protein                                               | 100 | 100 |
| BMAA1676   | hypothetical protein                                                         | 100 | 100 |
| BMAA1677   | hypothetical protein                                                         | 100 | 99  |
| BMAA1686   | amino acid ABC transporter, periplasmic amino acid-binding protein, putative | 100 | 99  |
| BMAA1688   | amino acid ABC transporter, ATP-binding/permease protein                     | 100 | 99  |
| BMAA1689   | nitrilotriacetate monooxygenase component A                                  | 100 | 99  |
| BMAA1690   | luciferase-like monooxygenase                                                | 100 | 100 |
| BMAA1691   | amino acid ABC transporter, periplasmic amino acid-binding protein, putative | 100 | 99  |
| BMAA1692   | acetyltransferase, GNAT family                                               | 100 | 99  |
| BMAA1693   | conserved hypothetical protein                                               | 100 | 99  |
| BMAA1698   | outer membrane porin, putative                                               | 100 | 99  |
| BMAA1702   | UTP-glucose-1-phosphate uridylyltransferase                                  | 100 | 100 |
| BMAA1703   | hypothetical protein                                                         | 100 | 98  |
| BMAA1716   | sporulation-related repeat protein                                           | 100 | 99  |
| BMAA1724   | conserved hypothetical protein                                               | 100 | 97  |
| BMAA1730   | hypothetical protein                                                         | 100 | 97  |
| BMAA1731   | EDTA monooxygenase, putative                                                 | 100 | 100 |
| BMAA1732   | hypothetical protein                                                         | 100 | 99  |
| BMAA1733   | hypothetical protein                                                         | 100 | 97  |
| BMAA1734   | hypothetical protein                                                         | 100 | 98  |
| BMAA1735   | hypothetical protein                                                         | 100 | 100 |
| BMAA1740   | IS407A, transposase OrfA                                                     | 100 | 97  |
| BMAA1741   | IS407A, transposase OrfB                                                     | 100 | 99  |
| BMAA1756   | hemagglutinin, homolog                                                       | 100 | 98  |

|          |                                                                    |     |     |
|----------|--------------------------------------------------------------------|-----|-----|
| BMAA1757 | hemolysin activator protein, HlyB family                           | 100 | 100 |
| BMAA1758 | transposase, truncated                                             | 100 | 96  |
| BMAA1759 | IS407A, transposase OrfA                                           | 100 | 98  |
| BMAA1760 | IS407A, transposase OrfB                                           | 100 | 99  |
| BMAA1771 | DJ-1/Pfpl family protein                                           | 100 | 100 |
| BMAA1772 | transcriptional regulator, AraC family                             | 100 | 100 |
| BMAA1774 | drug resistance transporter, Bcr/CflA subfamily, putative          | 100 | 98  |
| BMAA1782 | hypothetical protein                                               | 100 | 99  |
| BMAA1783 | nitroreductase family protein                                      | 100 | 99  |
| BMAA1788 | IS407A, transposase OrfA                                           | 100 | 98  |
| BMAA1789 | IS407A, transposase OrfB                                           | 100 | 99  |
| BMAA1804 | ISBma2, transposase                                                | 100 | 99  |
| BMAA1805 | hypothetical protein                                               | 100 | 98  |
| BMAA1807 | aminoglycoside 6'-N-acetyltransferase Iz                           | 100 | 99  |
| BMAA1808 | dihydroxyacetone kinase family protein                             | 100 | 99  |
| BMAA1809 | dihydroxyacetone kinase family protein                             | 100 | 99  |
| BMAA1810 | oxidoreductase, zinc-binding dehydrogenase family                  | 100 | 99  |
| BMAA1811 | 2-deoxy-D-gluconate 3-dehydrogenase                                | 100 | 99  |
| BMAA1812 | sugar ABC transporter, periplasmic sugar-binding protein, putative | 100 | 100 |
| BMAA1814 | sugar ABC transporter, ATP-binding protein                         | 100 | 99  |
| BMAA1815 | ribose 5-phosphate isomerase                                       | 100 | 100 |
| BMAA1816 | sugar-binding protein, putative                                    | 100 | 99  |
| BMAA1817 | outer membrane porin, putative                                     | 100 | 100 |
| BMAA1818 | conserved hypothetical protein TIGR00725                           | 100 | 98  |
| BMAA1819 | ABC transporter, permease protein, putative                        | 100 | 99  |
| BMAA1820 | ABC transporter, periplasmic substrate-binding protein             | 100 | 100 |
| BMAA1821 | ABC transporter, ATP-binding protein                               | 100 | 99  |
| BMAA1822 | ABC transporter, permease protein, putative                        | 100 | 99  |
| BMAA1823 | hypothetical protein                                               | 100 | 100 |
| BMAA1824 | transcriptional regulator, LysR family                             | 100 | 100 |
| BMAA1825 | hypothetical protein                                               | 100 | 100 |
| BMAA1841 | glyoxalase family protein                                          | 100 | 99  |
| BMAA1842 | hypothetical protein                                               | 100 | 100 |
| BMAA1843 | type I phosphodiesterase/nucleotide pyrophosphatase family protein | 100 | 99  |
| BMAA1845 | conserved hypothetical protein                                     | 100 | 98  |
| BMAA1848 | hypothetical protein                                               | 100 | 98  |
| BMAA1850 | hypothetical protein                                               | 100 | 96  |
| BMAA1852 | conserved domain protein                                           | 100 | 99  |
| BMAA1854 | hypothetical protein                                               | 97  | 97  |
| BMAA1863 | conserved hypothetical protein                                     | 100 | 98  |
| BMAA1864 | conserved hypothetical protein                                     | 100 | 100 |
| BMAA1865 | conserved hypothetical protein                                     | 100 | 99  |
| BMAA1873 | hypothetical protein                                               | 100 | 98  |
| BMAA1874 | lipoprotein, putative                                              | 100 | 99  |
| BMAA1875 | hypothetical protein                                               | 100 | 99  |
| BMAA1877 | penicillin amidase, putative                                       | 100 | 99  |
| BMAA1878 | transcriptional regulator, LysR family                             | 100 | 100 |
| BMAA1879 | hypothetical protein                                               | 100 | 95  |
| BMAA1880 | LamB/YcsF family protein                                           | 100 | 99  |



|          |                                                            |     |     |
|----------|------------------------------------------------------------|-----|-----|
| BMAA1881 | biotin-requiring enzyme domain protein                     | 100 | 98  |
| BMAA1882 | acetyl-CoA carboxylase, biotin carboxylase, putative       | 100 | 98  |
| BMAA1883 | allophanate hydrolase, subunit 1                           | 100 | 100 |
| BMAA1884 | urea amidolyase-related protein                            | 100 | 99  |
| BMAA1885 | membrane protein, putative                                 | 100 | 99  |
| BMAA1886 | hypothetical protein                                       | 100 | 97  |
| BMAA1891 | hypothetical protein                                       | 100 | 98  |
| BMAA1892 | transcriptional regulator, AraC family, truncation         | 100 | 98  |
| BMAA1893 | NAD(P)H dehydrogenase, quinone family                      | 100 | 100 |
| BMAA1894 | transcriptional regulator, LysR family                     | 100 | 99  |
| BMAA1895 | conserved domain protein                                   | 100 | 98  |
| BMAA1897 | conserved hypothetical protein                             | 100 | 98  |
| BMAA1898 | conserved hypothetical protein                             | 100 | 98  |
| BMAA1899 | hypothetical protein                                       | 100 | 99  |
| BMAA1900 | pentapeptide repeat family protein                         | 100 | 99  |
| BMAA1901 | Rhs element Vgr protein                                    | 100 | 99  |
| BMAA1902 | conserved hypothetical protein                             | 100 | 96  |
| BMAA1904 | conserved hypothetical protein                             | 100 | 99  |
| BMAA1905 | conserved hypothetical protein                             | 100 | 98  |
| BMAA1906 | conserved hypothetical protein                             | 100 | 99  |
| BMAA1907 | hypothetical protein                                       | 100 | 99  |
| BMAA1909 | conserved hypothetical protein                             | 100 | 99  |
| BMAA1910 | conserved hypothetical protein                             | 100 | 100 |
| BMAA1911 | conserved hypothetical protein                             | 100 | 100 |
| BMAA1912 | conserved hypothetical protein                             | 100 | 99  |
| BMAA1913 | conserved hypothetical protein                             | 100 | 99  |
| BMAA1914 | OmpA domain protein                                        | 100 | 99  |
| BMAA1917 | hypothetical protein                                       | 100 | 99  |
| BMAA1925 | hypothetical protein                                       | 100 | 96  |
| BMAA1928 | hypothetical protein                                       | 100 | 95  |
| BMAA1930 | hypothetical protein                                       | 100 | 100 |
| BMAA1931 | oxidoreductase, short-chain dehydrogenase/reductase family | 100 | 99  |
| BMAA1936 | hypothetical protein                                       | 100 | 100 |
| BMAA1943 | conserved domain protein                                   | 100 | 98  |
| BMAA1946 | IS407A, transposase OrfA                                   | 100 | 98  |
| BMAA1947 | IS407A, transposase OrfB                                   | 100 | 99  |
| BMAA1955 | hypothetical protein                                       | 100 | 95  |
| BMAA1965 | hypothetical protein                                       | 100 | 97  |
| BMAA1967 | hypothetical protein                                       | 100 | 96  |
| BMAA1968 | ISBma2, transposase                                        | 100 | 99  |
| BMAA1969 | hypothetical protein                                       | 100 | 99  |
| BMAA1970 | conserved hypothetical protein                             | 100 | 100 |
| BMAA1971 | oxidoreductase, short-chain dehydrogenase/reductase family | 100 | 100 |
| BMAA1972 | hypothetical protein                                       | 100 | 96  |
| BMAA1973 | conserved hypothetical protein                             | 100 | 99  |
| BMAA1974 | conserved hypothetical protein                             | 100 | 98  |
| BMAA1975 | oxidoreductase, short chain dehydrogenase/reductase family | 100 | 98  |
| BMAA1977 | glycosyl transferase, group 1 family protein               | 100 | 99  |
| BMAA1978 | NAD-dependent epimerase/dehydratase family protein         | 100 | 100 |

|            |                                                                                 |     |     |
|------------|---------------------------------------------------------------------------------|-----|-----|
| BMAA1979   | sensory box histidine kinase/response regulator                                 | 100 | 99  |
| BMAA1980   | conserved hypothetical protein                                                  | 100 | 99  |
| BMAA1981   | glycosyl transferase, group 2 family protein                                    | 100 | 100 |
| BMAA1982   | sigma-54 dependent DNA-binding response regulator                               | 100 | 100 |
| BMAA1983   | hypothetical protein                                                            | 100 | 98  |
| BMAA1984   | sigma-54 dependent transcriptional regulator, authentic point mutation          | 100 | 99  |
| BMAA1986   | ADP-heptose--LPS heptosyltransferase II, putative                               | 100 | 99  |
| BMAA1987   | glycosyl transferase, group 2 family protein                                    | 100 | 100 |
| BMAA1988   | carbamoyltransferase family protein                                             | 100 | 99  |
| BMAA1989   | heptosyltransferase family protein                                              | 100 | 97  |
| BMAA1990   | HAD-superfamily hydrolase                                                       | 100 | 99  |
| BMAA1991   | oxidoreductase, short chain dehydrogenase/reductase family                      | 100 | 99  |
| BMAA1992   | hypothetical protein                                                            | 100 | 99  |
| BMAA1995   | conserved domain protein                                                        | 100 | 99  |
| BMAA1997   | phosphatidylserine decarboxylase, putative                                      | 100 | 99  |
| BMAA1998   | succinate dehydrogenase, iron-sulfur protein                                    | 100 | 100 |
| BMAA2002   | hypothetical protein                                                            | 100 | 98  |
| BMAA2005   | hypothetical protein                                                            | 100 | 98  |
| BMAA2006.1 | hypothetical protein                                                            | 100 | 98  |
| BMAA2008   | hypothetical protein                                                            | 100 | 99  |
| BMAA2011   | 2-oxoisovalerate dehydrogenase, E2 component, dihydrolipamide acetyltransferase | 100 | 99  |
| BMAA2014   | hypothetical protein                                                            | 100 | 100 |
| BMAA2015   | hypothetical protein                                                            | 100 | 96  |
| BMAA2016   | hypothetical protein                                                            | 100 | 98  |
| BMAA2021   | hypothetical protein                                                            | 100 | 98  |
| BMAA2036   | outer membrane porin, putative                                                  | 100 | 100 |
| BMAA2037   | medium-chain-fatty-acid--CoA ligase                                             | 100 | 99  |
| BMAA2039   | transcriptional regulator, LuxR family                                          | 100 | 99  |
| BMAA2040   | hypothetical protein                                                            | 100 | 98  |
| BMAA2041   | hypothetical protein                                                            | 100 | 98  |
| BMAA2042   | quinone oxidoreductase                                                          | 100 | 100 |
| BMAA2043   | alpha-ketoglutarate-dependent taurine dioxygenase                               | 100 | 99  |
| BMAA2044   | conserved hypothetical protein                                                  | 100 | 99  |
| BMAA2045   | major facilitator family transporter                                            | 100 | 99  |
| BMAA2047   | molybdopterin oxidoreductase family protein                                     | 100 | 99  |
| BMAA2048   | iron-sulfur cluster-binding protein                                             | 100 | 98  |
| BMAA2049   | membrane protein, putative                                                      | 100 | 100 |
| BMAA2049.2 | hypothetical protein                                                            | 99  | 97  |
| BMAA2052   | polysaccharide deacetylase family protein                                       | 99  | 96  |
| BMAA2054   | conserved domain protein                                                        | 100 | 98  |
| BMAA2056   | lipoprotein, putative                                                           | 100 | 99  |
| BMAA2057   | hypothetical protein                                                            | 98  | 100 |
| BMAA2057.1 | hypothetical protein                                                            | 100 | 97  |
| BMAA2059   | outer membrane porin, putative                                                  | 100 | 99  |
| BMAA2060   | hypothetical protein                                                            | 100 | 100 |
| BMAA2061.1 | hypothetical protein                                                            | 100 | 99  |
| BMAA2063   | acetyltransferase, GNAT family                                                  | 100 | 100 |
| BMAA2064   | acetyltransferase, GNAT family                                                  | 100 | 100 |
| BMAA2065   | conserved hypothetical protein                                                  | 100 | 99  |

|            |                          |     |     |
|------------|--------------------------|-----|-----|
| BMAA2066   | TldD/PmbA family protein | 100 | 100 |
| BMAA2067   | conserved domain protein | 100 | 97  |
| BMAA2068   | hypothetical protein     | 100 | 99  |
| BMAA2069   | hypothetical protein     | 100 | 100 |
| BMAA2073   | IS407A, transposase OrfB | 100 | 99  |
| BMAA2074   | IS407A, transposase OrfA | 100 | 98  |
| BMAA2075   | ISBma2, transposase      | 100 | 99  |
| BMAA2100.1 | hypothetical protein     | 100 | 98  |
| BMAA2104   | esterase EstC            | 100 | 99  |
| BMAA2108   | hypothetical protein     | 100 | 97  |
| BMAA2116   | ISBma2, transposase      | 100 | 99  |
| BMAA2118   | hypothetical protein     | 100 | 97  |

---

**Segment 3- Bm-unique**

| <b>Gene</b> | <b>Description</b>                                            |
|-------------|---------------------------------------------------------------|
| BMA0007     | hypothetical protein                                          |
| BMA0008     | FG-GAP/YD repeat domain protein                               |
| BMA0009     | hypothetical protein                                          |
| BMA0016.1   | hypothetical protein                                          |
| BMA0017     | hypothetical protein                                          |
| BMA0090     | hypothetical protein                                          |
| BMA0099     | conserved hypothetical protein                                |
| BMA0108     | conserved hypothetical protein                                |
| BMA0112     | hypothetical protein                                          |
| BMA0119     | hypothetical protein                                          |
| BMA0126     | hypothetical protein                                          |
| BMA0127     | hypothetical protein                                          |
| BMA0178     | N-acyl-D-amino-acid deacylase family protein                  |
| BMA0212     | membrane protein, putative, authentic frameshift              |
| BMA0233     | conserved hypothetical protein, authentic frameshift          |
| BMA0253     | hypothetical protein                                          |
| BMA0255     | hypothetical protein                                          |
| BMA0262.1   | hypothetical protein                                          |
| BMA0267     | conserved domain protein, truncation                          |
| BMA0286     | molybdenum cofactor biosynthesis protein C, truncation        |
| BMA0287     | conserved hypothetical protein                                |
| BMA0318     | hypothetical protein                                          |
| BMA0332     | tagatose 6-phosphate kinase, putative, authentic frameshift   |
| BMA0361     | thioredoxin, authentic frameshift                             |
| BMA0364     | hypothetical protein                                          |
| BMA0379     | conserved hypothetical protein, authentic frameshift          |
| BMA0386     | sigma-54 dependent DNA-binding transcriptional regulator      |
| BMA0409     | acyl-CoA dehydrogenase domain protein, authentic frameshift   |
| BMA0419     | hypothetical protein                                          |
| BMA0440     | ISBma2, transposase, truncation                               |
| BMA0482     | hypothetical protein                                          |
| BMA0497     | site-specific recombinase, phage integrase family, truncation |
| BMA0522     | phosphoglycolate phosphatase, putative, degenerate            |
| BMA0569     | hypothetical protein                                          |

BMA0570 conserved hypothetical protein  
BMA0582.1 hypothetical protein  
BMA0587 IS407A, transposase OrfB, truncation  
BMA0601 ubiquinol oxidase, subunit III, authentic frameshift  
BMA0602 ubiquinol oxidase, subunit I, authentic frameshift  
BMA0605 conserved hypothetical protein  
BMA0612 SUF system FeS assembly ATPase SufC, internal deletion  
BMA0613 FeS assembly protein SufB , authentic frameshift  
BMA0642 conserved hypothetical protein, degenerate  
BMA0702 hypothetical protein  
BMA0737 endo/excinuclease domain protein  
BMA0738 beta-glucosidase, degenerate  
BMA0748 conserved hypothetical protein, authentic frameshift  
BMA0756 phage integrase, truncation  
BMA0789.1 hypothetical protein  
BMA0792 hypothetical protein  
BMA0801 conserved hypothetical protein  
BMA0818 maltooligosyl trehalose trehalohydrolase, putative  
BMA0820 1,4-alpha-glucan branching enzyme, authentic frameshift  
BMA0824.1 hypothetical protein  
BMA0844 hypothetical protein  
BMA0850 conserved hypothetical protein, authentic frameshift  
BMA0850.1 hypothetical protein  
BMA0876 fimbrial usher family protein, authentic frameshift  
BMA0881 conserved hypothetical protein, authentic frameshift  
BMA0889 beta-N-acetylglucosaminidase, putative, authentic frameshift  
BMA0894 CAIB/BAIF family protein  
BMA0897 conserved hypothetical protein, truncation  
BMA0901 serine protease, authentic frameshift  
BMA0945 acyltransferase, putative, authentic frameshift  
BMA0947 ISBma4, transposase, truncation  
BMA0951 hypothetical protein  
BMA0964 hypothetical protein  
BMA0971 nonribosomal peptide synthetase, putative, degenerate  
BMA0999.1 hypothetical protein  
BMA1009 alcohol dehydrogenase, iron-containing, authentic frameshift  
BMA1010 hypothetical protein  
BMA1014 hypothetical protein  
BMA1021 type-1 fimbrial protein, authentic frameshift  
BMA1026 hypothetical protein  
BMA1027 outer membrane protein, putative  
BMA1037 hypothetical protein  
BMA1084 conserved hypothetical protein  
BMA1117 transposase, IS3 family, truncation  
BMA1122 hypothetical protein  
BMA1170 CobN/magnesium chelatase family protein  
BMA1174 cbiG protein  
BMA1182 hypothetical protein  
BMA1184 conserved hypothetical protein

BMA1192 hypothetical protein  
BMA1224.1 hypothetical protein  
BMA1267 methyl-accepting chemotaxis domain protein  
BMA1287 membrane protein, putative  
BMA1288 secretion system protein, putative, authentic frameshift  
BMA1297 hypothetical protein  
BMA1313 phosphoserine phosphatase  
BMA1386 aminotransferase, classes I and II, authentic frameshift  
BMA1405 conserved hypothetical protein  
BMA1411 ISBma4, transposase, truncation  
BMA1414.1 hypothetical protein  
BMA1452 hypothetical protein  
BMA1455 carboxymuconolactone decarboxylase family protein  
BMA1456 conserved hypothetical protein  
BMA1470 hypothetical protein  
BMA1477 hypothetical protein  
BMA1488.1 hypothetical protein  
BMA1525 hypothetical protein  
BMA1527 conserved hypothetical protein, authentic frameshift  
BMA1561 hypothetical protein  
BMA1595 hypothetical protein  
BMA1634.1 nonribosomal peptide synthetase, authentic frameshift  
BMA1649 hypothetical protein  
BMA1673 peptidyl-prolyl cis-trans isomerase, FKBP-type, authentic frameshift  
BMA1674.1 hypothetical protein  
BMA1720 pyruvate dehydrogenase, E2 component, dihydrolipoamide acetyltransferase  
BMA1766 EAL domain protein  
BMA1781 conserved hypothetical protein, authentic frameshift  
BMA1787 transcriptional regulator, putative  
BMA1843 2-isopropylmalate synthase, authentic frameshift  
BMA1868 membrane protein, putative, authentic frameshift  
BMA1871 conserved domain protein  
BMA1873 sensor histidine kinase KdpD, authentic frameshift  
BMA1894.1 hypothetical protein  
BMA1924 cell division protein FtsK, putative  
BMA1925 hypothetical protein  
BMA2003 hypothetical protein  
BMA2007 hypothetical protein  
BMA2016 transcriptional regulator, putative  
BMA2029 transport-associated domain protein  
BMA2034 iron compound ABC transporter, periplasmic iron-compound binding protein, authentic frameshift  
BMA2043.1 hypothetical protein  
BMA2085 IS110 transposase, degenerate  
BMA2114 acetyltransferase, GNAT family  
BMA2185 urease accessory protein UreE  
BMA2253.1 hypothetical protein  
BMA2253.2 hypothetical protein  
BMA2253.3 membrane protein, putative  
BMA2260 hypothetical protein

BMA2426 hypothetical protein  
BMA2459 ureidoglycolate hydrolase, authentic frameshift  
BMA2508 hypothetical protein  
BMA2541 hypothetical protein  
BMA2580 acetyltransferase, GNAT family  
BMA2692 terminase, large subunit, truncation  
BMA2808 hypothetical protein  
BMA2812 hypothetical protein  
BMA2849 lipoprotein, putative  
BMA2859 chemotaxis protein CheA  
BMA2861 chemotaxis MotB protein, putative, authentic frameshift  
BMA2899.1 hypothetical protein  
BMA2920 oxidoreductase, FAD/FMN-binding  
BMA2996 conserved domain protein  
BMA3005 site-specific recombinase, phage integrase family  
BMA3008 lipoprotein, putative  
BMA3009 lipoprotein, putative  
BMA3012 hypothetical protein  
BMA3027 conserved hypothetical protein, truncation  
BMA3028 conserved domain protein  
BMA3032 triphosphoribosyl-dephospho-CoA synthase  
BMA3043.1 hypothetical protein  
BMA3054 conserved hypothetical protein, authentic frameshift  
BMA3065 hypothetical protein  
BMA3069 hypothetical protein  
BMA3074 hypothetical protein  
BMA3100 adenine phosphoribosyltransferase, authentic frameshift  
BMA3117 lipoprotein, putative  
BMA3173.1 hypothetical protein  
BMA3227 C4-dicarboxylate transport sensor protein, putative, authentic frameshift  
BMA3272 conserved domain protein  
BMA3274 acyl-CoA dehydrogenase domain protein, authentic frameshift  
BMA3290 DNA-binding response regulator, LuxR family  
BMA3300 hypothetical protein  
BMA3303 dipeptide ABC transporter, permease protein, authentic frameshift  
BMA3324 hypothetical protein  
BMA3338 transcriptional regulator, LysR family, authentic frameshift  
BMA3373 hypothetical protein  
BMA3392 outer membrane porin, truncation  
BMAA0034 hypothetical protein  
BMAA0038 hypothetical protein  
BMAA0057.1 hypothetical protein  
BMAA0063 hypothetical protein  
BMAA0070 sensor histidine kinase, authentic frameshift  
BMAA0074 hypothetical protein  
BMAA0075 hypothetical protein  
BMAA0081 conserved domain protein  
BMAA0118 hypothetical protein  
BMAA0119 hypothetical protein

BMAA0136 hypothetical protein  
BMAA0140 RND efflux system, membrane fusion protein, authentic frameshift  
BMAA0149 outer membrane efflux lipoprotein, NodT family, authentic frameshift  
BMAA0151 hypothetical protein  
BMAA0161 hypothetical protein  
BMAA0167 hypothetical protein  
BMAA0173 ISBma1, transposase, interruption-C  
BMAA0178 hypothetical protein  
BMAA0209 hypothetical protein  
BMAA0210 conserved hypothetical protein, authentic frameshift  
BMAA0224 hypothetical protein  
BMAA0227 hypothetical protein  
BMAA0229 hypothetical protein  
BMAA0236 hypothetical protein  
BMAA0248 hypothetical protein  
BMAA0249 hypothetical protein  
BMAA0257 hypothetical protein  
BMAA0264 hypothetical protein  
BMAA0265 hypothetical protein  
BMAA0281 hypothetical protein  
BMAA0285 conserved hypothetical protein, authentic frameshift  
BMAA0295 hypothetical protein  
BMAA0310 site-specific recombinase, phage integrase family  
BMAA0315 hypothetical protein  
BMAA0323 hypothetical protein  
BMAA0326 hypothetical protein  
BMAA0333 hypothetical protein  
BMAA0386 D-serine dehydratase, authentic frameshift  
BMAA0391 monooxygenase family protein  
BMAA0395 hypothetical protein  
BMAA0400 conserved hypothetical protein  
BMAA0411 conserved hypothetical protein, authentic frameshift  
BMAA0412 YD repeat protein  
BMAA0415 conserved hypothetical protein, truncation  
BMAA0428 lipase, authentic frameshift  
BMAA0434 spermidine/putrescine ABC transporter, permease protein, authentic frameshift  
BMAA0485 ABC transporter, periplasmic glycine/betaine-binding protein, putative  
BMAA0496 oxidoreductase, short-chain dehydrogenase/reductase family, truncation  
BMAA0539.1 hypothetical protein  
BMAA0554 di-haem cytochrome c peroxidase family protein, authentic frameshift  
BMAA0562 hypothetical protein  
BMAA0570 hypothetical protein  
BMAA0597 hypothetical protein  
BMAA0610 di-haem cytochrome c peroxidase family protein  
BMAA0620 LysR substrate-binding domain family protein, degenerate  
BMAA0623 hypothetical protein  
BMAA0631 feruloyl-CoA synthetase, putative, authentic frameshift  
BMAA0635 hypothetical protein  
BMAA0649 Hep\_Hag family protein/haemagglutinin motif family protein/YadA-like domain protein

BMAA0650 hypothetical protein  
BMAA0682 hypothetical protein  
BMAA0683 hypothetical protein  
BMAA0686 leucyl-tRNA synthetase, authentic frameshift  
BMAA0693 hypothetical protein  
BMAA0695 hypothetical protein  
BMAA0710 hypothetical protein  
BMAA0713 hypothetical protein  
BMAA0716 hypothetical protein  
BMAA0749 hemagglutinin domain protein  
BMAA0771 hypothetical protein  
BMAA0775 hypothetical protein  
BMAA0778 aminotransferase family protein  
BMAA0781 sulfite reductase (NADPH) flavoprotein alpha-component, authentic frameshift  
BMAA0789 hypothetical protein  
BMAA0807 hypothetical protein  
BMAA0810 YadA-like C-terminal region protein  
BMAA0813 hypothetical protein  
BMAA0820 cytochrome c4 family protein  
BMAA0825 hypothetical protein  
BMAA0838 hypothetical protein  
BMAA0843 hypothetical protein  
BMAA0844 transposase, degenerate  
BMAA0862 hypothetical protein  
BMAA0871 hypothetical protein  
BMAA0877 hypothetical protein  
BMAA0889 conserved domain protein  
BMAA0893 sarcosine oxidase, gamma subunit, authentic frameshift  
BMAA0895 hypothetical protein  
BMAA0902 hypothetical protein  
BMAA0902.1 hypothetical protein  
BMAA0926 hypothetical protein  
BMAA0928 hypothetical protein  
BMAA0941 hypothetical protein  
BMAA0950 major facilitator family transporter  
BMAA0956 conserved domain protein  
BMAA0960 hypothetical protein  
BMAA0965 hypothetical protein  
BMAA0967 hypothetical protein  
BMAA0985 hypothetical protein  
BMAA0989 conserved hypothetical protein  
BMAA1012 hypothetical protein  
BMAA1015 hypothetical protein  
BMAA1035 hypothetical protein  
BMAA1038 amino acid permease  
BMAA1051 phage integrase family protein  
BMAA1052 hypothetical protein  
BMAA1053 conserved hypothetical protein  
BMAA1060 hypothetical protein



BMAA1083 hypothetical protein  
BMAA1093 hypothetical protein  
BMAA1102 hypothetical protein  
BMAA1103 transcriptional regulator, LysR family  
BMAA1108 hypothetical protein  
BMAA1109 hypothetical protein  
BMAA1116 conserved hypothetical protein  
BMAA1124 hypothetical protein  
BMAA1129 ABC transporter, permease protein, authentic frameshift  
BMAA1134 2-dehydro-3-deoxyglucarate aldolase, authentic frameshift  
BMAA1152 hypothetical protein  
BMAA1156 hypothetical protein  
BMAA1171 conserved hypothetical protein, authentic frameshift  
BMAA1173 conserved domain protein  
BMAA1176 hypothetical protein  
BMAA1177 hypothetical protein  
BMAA1178.1 ribose transport system permease protein RbsC, internal deletion  
BMAA1189 transcriptional regulator, AraC family  
BMAA1194 hypothetical protein  
BMAA1203 polyketide synthase, putative, degenerate  
BMAA1204 polyketide synthase, putative  
BMAA1205 polyketide synthase, putative  
BMAA1206 polyketide synthase, putative, degenerate  
BMAA1207 hypothetical protein  
BMAA1219 TPR domain protein  
BMAA1225 response regulator, authentic frameshift  
BMAA1228 histidine kinase  
BMAA1229 hypothetical protein  
BMAA1246.1 hypothetical protein  
BMAA1257 hypothetical protein  
BMAA1260 hypothetical protein  
BMAA1279 hypothetical protein  
BMAA1300 membrane protein, putative  
BMAA1306 monooxygenase, truncation  
BMAA1310 pyridine nucleotide-disulphide oxidoreductase, class II, truncation  
BMAA1354 hypothetical protein  
BMAA1369 hypothetical protein  
BMAA1375 L-2-Amino-thiazoline-4-carboxylic acid hydrolase, authentic frameshift  
BMAA1382 hypothetical protein  
BMAA1383 hypothetical protein  
BMAA1388 hypothetical protein  
BMAA1389 conserved hypothetical protein  
BMAA1393 methyl-accepting chemotaxis protein, putative, authentic frameshift  
BMAA1402 conserved hypothetical protein, authentic frameshift  
BMAA1404 hypothetical protein  
BMAA1413 ISBma3, transposase, truncation  
BMAA1421 amino acid permease  
BMAA1427 hypothetical protein  
BMAA1444 hypothetical protein

BMAA1453 ketol-acid reductoisomerase, putative  
BMAA1472 hypothetical protein  
BMAA1475 porin, degenerate  
BMAA1483 hypothetical protein  
BMAA1489 hypothetical protein  
BMAA1497 hypothetical protein  
BMAA1516 ISBma5, transposase, authentic frameshift  
BMAA1526 BapA protein  
BMAA1538 BsaU protein  
BMAA1558 hypothetical protein  
BMAA1560 hypothetical protein  
BMAA1567 hypothetical protein  
BMAA1571 conserved domain protein  
BMAA1591 hypothetical protein  
BMAA1592 hipB domain protein  
BMAA1599 hypothetical protein  
BMAA1625 type III secretion inner membrane protein, authentic frameshift  
BMAA1629 type III secretion inner membrane protein SctQ  
BMAA1634 type III secretion inner membrane protein SctJ, authentic frameshift  
BMAA1670 hypothetical protein  
BMAA1684 hypothetical protein  
BMAA1687 hypothetical protein  
BMAA1694 hypothetical protein  
BMAA1695 lipoprotein, putative  
BMAA1699 hypothetical protein  
BMAA1704 acyltransferase, putative, authentic frameshift  
BMAA1707 conserved hypothetical protein  
BMAA1710 GDP-6-deoxy-D-lyxo-4-hexulose reductase, putative  
BMAA1711.1 hypothetical protein  
BMAA1742 hypothetical protein  
BMAA1762 hypothetical protein  
BMAA1765 oxidoreductase, 2OG-Fe(II) oxygenase family  
BMAA1784 hypothetical protein  
BMAA1787 alkyl hydroperoxide reductase, subunit f, truncation  
BMAA1790 conserved hypothetical protein, truncation  
BMAA1795 membrane protein, putative, authentic frameshift  
BMAA1813 sugar ABC transporter, permease protein  
BMAA1838 conserved hypothetical protein  
BMAA1839 transcriptional regulator, LysR family, authentic frameshift  
BMAA1849 hypothetical protein  
BMAA1851 copper-translocating P-type ATPase  
BMAA1859 drug resistance transporter family protein, authentic frameshift  
BMAA1861 hypothetical protein  
BMAA1866 conserved hypothetical protein  
BMAA1887 hypothetical protein  
BMAA1888 hypothetical protein  
BMAA1896 hypothetical protein  
BMAA1903 conserved hypothetical protein, authentic frameshift  
BMAA1908 ATP-dependent Clp protease, ATP-binding subunit ClpB, authentic frameshift

BMAA1915 conserved hypothetical protein, authentic frameshift  
 BMAA1916 hypothetical protein  
 BMAA1935 hypothetical protein  
 BMAA1938 hypothetical protein  
 BMAA1942 transporter, putative, authentic frameshift  
 BMAA1945 hypothetical protein  
 BMAA1948 conserved domain protein  
 BMAA1949 CAIB/BAIF family protein, authentic frameshift  
 BMAA1959 hypothetical protein  
 BMAA1975.1 hypothetical protein  
 BMAA1985 transferase, putative, authentic frameshift  
 BMAA1993 response regulator  
 BMAA1994 ABC transporter, ATP-binding protein, putative  
 BMAA1999 hypothetical protein  
 BMAA2024.1 hypothetical protein  
 BMAA2028.1 hypothetical protein  
 BMAA2032 hypothetical protein  
 BMAA2038 hypothetical protein  
 BMAA2046 conserved hypothetical protein, authentic frameshift  
 BMAA2049.1 hypothetical protein  
 BMAA2053 hypothetical protein  
 BMAA2089 polyketide synthase, putative  
 BMAA2103 hypothetical protein  
 BMAA2112 hypothetical protein

---

**Segment 4- Conserved between Bm and Bt but not as well or absent in Bp**

| Gene     | Description                                                        | to Bt    |            |
|----------|--------------------------------------------------------------------|----------|------------|
|          |                                                                    | % length | % identity |
| BMA0016  | hypothetical protein                                               | 99       | 87         |
| BMA0632  | conserved hypothetical protein                                     | 100      | 94         |
| BMA0808  | conserved hypothetical protein                                     | 99       | 95         |
| BMA0860  | manganese/iron transporter, NRAMP family                           | 100      | 91         |
| BMA0935  | RND efflux system, outer membrane lipoprotein, NodT family protein | 98       | 86         |
| BMA1076  | ISBma1, transposase, truncation                                    | 99       | 90         |
| BMA1133  | hypothetical protein                                               | 100      | 94         |
| BMA1194  | carbohydrate kinase, FGGY family                                   | 100      | 93         |
| BMA1233  | ISBma1, transposase, interruption-C                                | 95       | 98         |
| BMA1280  | hfq protein                                                        | 100      | 89         |
| BMA2657  | conserved hypothetical protein                                     | 100      | 86         |
| BMA3093  | single-strand binding protein                                      | 100      | 91         |
| BMAA0435 | serine protease, subtilase family, truncation                      | 95       | 93         |
| BMAA0611 | phosphoesterase family protein                                     | 100      | 95         |
| BMAA0799 | nitric oxide reductase                                             | 100      | 90         |
| BMAA0854 | hypothetical protein                                               | 100      | 86         |
| BMAA1298 | methyl-accepting chemotaxis protein                                | 99       | 91         |
| BMAA2091 | membrane protein, putative                                         | 98       | 88         |

**Segment 5- Bp unique**

| Gene | Description |
|------|-------------|
|------|-------------|

BPSL0066 putative membrane protein  
BPSL0068 putative lipoprotein  
BPSL0081 putative phage integrase  
BPSL0083 hypothetical protein  
BPSL0084 hypothetical protein  
BPSL0085 conserved hypothetical protein  
BPSL0086 hypothetical protein  
BPSL0087 putative DNA-binding protein  
BPSL0088 conserved hypothetical protein  
BPSL0089 hypothetical protein  
BPSL0092 putative lipoprotein  
BPSL0095 hypothetical protein  
BPSL0105 hypothetical protein  
BPSL0129 prophage integrase  
BPSL0130 conserved hypothetical phage protein  
BPSL0130a hypothetical phage protein  
BPSL0131 hypothetical phage protein  
BPSL0132 hypothetical phage protein  
BPSL0133 hypothetical phage protein  
BPSL0134 putative phage-encoded membrane protein  
BPSL0135 conserved hypothetical phage protein  
BPSL0136 hypothetical phage protein  
BPSL0137 hypothetical phage protein  
BPSL0138 putative phage protein  
BPSL0139 putative phage DNA-binding protein  
BPSL0140 hypothetical phage protein  
BPSL0141 putative phage DNA-binding protein  
BPSL0142 putative phage-encoded membrane protein  
BPSL0143 hypothetical phage protein  
BPSL0146 putative phage-encoded membrane protein  
BPSL0158 putative phage protein  
BPSL0176 putative phage-encoded membrane protein  
BPSL0221 conserved hypothetical protein (partial)  
BPSL0234 hypothetical protein  
BPSL0269 putative flagella basal body P-ring formation protein  
BPSL0306 putative membrane protein  
BPSL0337 MutT/NUDIX family protein  
BPSL0339 putative lipoprotein  
BPSL0343 putative hydrolase  
BPSL0344 putative exported protein  
BPSL0345 hypothetical protein  
BPSL0347 putative insertion element protein  
BPSL0348 hypothetical protein  
BPSL0349 conserved hypothetical protein  
BPSL0350 Fis family regulatory protein  
BPSL0377 hypothetical protein  
BPSL0548 hypothetical protein  
BPSL0549 hypothetical protein  
BPSL0550 hypothetical protein

BPSL0551 hypothetical protein  
BPSL0552 hypothetical protein  
BPSL0553 putative DNA-binding protein  
BPSL0554 hypothetical phage protein  
BPSL0555 putative membrane protein  
BPSL0556 hypothetical protein  
BPSL0557 hypothetical protein  
BPSL0558 putative DNA-binding protein  
BPSL0559 hypothetical protein  
BPSL0560 hypothetical protein  
BPSL0561 putative exported protein  
BPSL0562 putative DNA-binding protein  
BPSL0563 hypothetical protein  
BPSL0564 hypothetical protein  
BPSL0565 hypothetical protein  
BPSL0566 hypothetical protein  
BPSL0567 hypothetical protein  
BPSL0568 hypothetical protein  
BPSL0569 conserved hypothetical protein  
BPSL0570 conserved hypothetical protein  
BPSL0571 putative membrane protein  
BPSL0572 hypothetical protein  
BPSL0573 putative exported protein  
BPSL0574 subtilase family protein  
BPSL0575 hypothetical protein  
BPSL0576 hypothetical protein  
BPSL0577 phage integrase family protein  
BPSL0582 hypothetical protein  
BPSL0583 hypothetical protein  
BPSL0584 putative membrane protein  
BPSL0585 hypothetical protein  
BPSL0586 hypothetical protein  
BPSL0586a hypothetical protein  
BPSL0587 phage integrase family protein  
BPSL0588 hypothetical protein  
BPSL0681 conserved hypothetical protein  
BPSL0701 putative exported protein  
BPSL0708 putative transport protein (partial)  
BPSL0709 putative LysR family transcriptional regulator  
BPSL0711 putative membrane protein  
BPSL0714 hypothetical protein (pseudogene)  
BPSL0718 putative phosphoribosyl transferase protein  
BPSL0720 putative alcohol dehydrogenase cytochrome c subunit precursor  
BPSL0721 putative membrane protein  
BPSL0722 putative cytochrome c oxidase subunit I  
BPSL0723 putative cytochrome c oxidase polypeptide II precursor  
BPSL0724 putative thiamine pyrophosphate requiring enzyme  
BPSL0725 putative mandelate racemase  
BPSL0726 putative membrane protein

BPSL0727 hypothetical protein  
BPSL0728 putative glucose dehydrogenase  
BPSL0729 conserved hypothetical protein  
BPSL0730 putative penicillin acylase II  
BPSL0731 LysR family transcriptional regulator  
BPSL0735 hypothetical protein  
BPSL0736 hypothetical protein  
BPSL0737 hypothetical protein  
BPSL0738 hypothetical protein  
BPSL0739 hypothetical protein  
BPSL0740 hypothetical protein  
BPSL0741 conserved hypothetical protein  
BPSL0742 putative membrane protein  
BPSL0743 conserved hypothetical protein  
BPSL0744 putative phage-related integrase  
BPSL0745 hypothetical protein  
BPSL0746 hypothetical protein  
BPSL0747 hypothetical protein  
BPSL0747a hypothetical protein  
BPSL0748 hypothetical protein  
BPSL0749 hypothetical protein  
BPSL0750 hypothetical protein  
BPSL0751 hypothetical protein  
BPSL0752 hypothetical protein  
BPSL0753 hypothetical protein  
BPSL0754 putative integrase/recombinase (partial)  
BPSL0756 putative DNA-binding protein  
BPSL0757 hypothetical protein  
BPSL0758 putative phosphoesterase  
BPSL0759 hypothetical protein  
BPSL0760 hypothetical protein  
BPSL0761 hypothetical protein  
BPSL0762 putative RNA 2'-phosphotransferase  
BPSL0763 putative helicase SNF2 family protein  
BPSL0764 hypothetical protein  
BPSL0765 putative helicase family protein  
BPSL0766 hypothetical protein  
BPSL0767 putative phospholipase protein  
BPSL0768 conserved hypothetical protein  
BPSL0769 hypothetical protein  
BPSL0770 conserved hypothetical protein  
BPSL0771 hypothetical protein  
BPSL0772 phage integrase family protein  
BPSL0828 putative tagatose 6-phosphate kinase protein  
BPSL0889 hypothetical protein  
BPSL0892a putative lipoprotein  
BPSL0938A hypothetical protein  
BPSL0939 putative DeoR family regulatory protein  
BPSL0940 conserved hypothetical protein

BPSL0941 hypothetical protein  
BPSL0942 hypothetical protein  
BPSL0943 putative insertion element protein  
BPSL0944 putative phage integrase/recombinase protein  
BPSL0945 conserved hypothetical protein  
BPSL0946 conserved hypothetical protein  
BPSL0947 putative type I restriction enzyme specificity protein  
BPSL0948 putative type I restriction-modification methylase  
BPSL0949 hypothetical protein  
BPSL0951 insertion element hypothetical protein (partial)  
BPSL0952 putative replication protein  
BPSL0953 hypothetical protein  
BPSL0954 hypothetical protein  
BPSL0970 putative isoleucine biosynthesis transcriptional activator  
BPSL1022 hypothetical protein  
BPSL1023 putative beta-glucosidase (partial)  
BPSL1041 hypothetical protein  
BPSL1047 hypothetical protein  
BPSL1051 putative membrane protein (partial)  
BPSL1058 putative transposase (partial)  
BPSL1059 conserved hypothetical protein  
BPSL1060 hypothetical protein  
BPSL1109 putative membrane protein  
BPSL1137 hypothetical protein  
BPSL1138 hypothetical protein  
BPSL1139 hypothetical protein  
BPSL1140 putative phage-related protein  
BPSL1141 hypothetical protein  
BPSL1142 putative phage-related protein  
BPSL1143 putative phage terminase  
BPSL1144 putative exported protein  
BPSL1145 putative phage-related protein  
BPSL1146 hypothetical protein  
BPSL1147 hypothetical protein  
BPSL1148 hypothetical protein  
BPSL1149 hypothetical protein  
BPSL1150 hypothetical protein  
BPSL1151 hypothetical protein  
BPSL1152 hypothetical protein  
BPSL1153 hypothetical protein  
BPSL1153A hypothetical protein  
BPSL1154 hypothetical protein  
BPSL1155 conserved hypothetical protein  
BPSL1156 hypothetical protein  
BPSL1157 putative phage integrase  
BPSL1252 putative phosphorous compounds metabolism-related protein  
BPSL1255 hypothetical protein  
BPSL1274 hypothetical protein  
BPSL1290a hypothetical protein

BPSL1293 putative membrane protein  
BPSL1317 putative lipoprotein  
BPSL1368 hypothetical protein  
BPSL1384 putative phage-related protein (partial)  
BPSL1384a putative phage-related protein (partial)  
BPSL1385 hypothetical protein  
BPSL1386 hypothetical protein  
BPSL1390 hypothetical protein  
BPSL1391 putative phage related protein (partial)  
BPSL1392 hypothetical protein  
BPSL1393 putative exported avidin family protein  
BPSL1408 conserved hypothetical protein (partial)  
BPSL1409 hypothetical protein  
BPSL1457 conserved hypothetical protein  
BPSL1565 putative MerR-family transcriptional regulator  
BPSL1584 peptide synthetase nrps12  
BPSL1612 hypothetical protein  
BPSL1619 putative alcohol dehydrogenase (pseudogene)  
BPSL1621 hypothetical protein  
BPSL1624 hypothetical protein  
BPSL1626 putative fimbrial subunit type 1 precursor  
BPSL1630 hypothetical protein  
BPSL1631 putative outer membrane protein  
BPSL1634 putative two-component regulatory system, sensor kinase protein  
BPSL1635 conserved hypothetical protein  
BPSL1636 putative regulatory protein  
BPSL1637 putative lipase  
BPSL1639 putative transposase (partial)  
BPSL1642 putative GntR-family regulatory protein  
BPSL1643 conserved hypothetical protein  
BPSL1644 putative hydrolase  
BPSL1645 putative oxygenase  
BPSL1646 putative monooxygenase  
BPSL1647 putative betaine aldehyde dehydrogenase  
BPSL1648 conserved hypothetical protein  
BPSL1649 putative ABC transport system, substrate-binding protein  
BPSL1650 putative ABC transport system, permease protein  
BPSL1651 putative ABC transport system, permease protein  
BPSL1652 putative ABC transport system, ATP-binding protein  
BPSL1653 putative GntR-family regulatory protein  
BPSL1654 succinate-semialdehyde dehydrogenase [NADP+]  
BPSL1655 putative outer membrane porin protein  
BPSL1656 hypothetical protein  
BPSL1658a putative DNA-binding protein, H-NS-like  
BPSL1659 putative exported protein  
BPSL1660 putative outer membrane protein  
BPSL1661 putative hemolysin-related protein  
BPSL1662 hypothetical protein  
BPSL1663 conserved hypothetical protein



BPSL1664 putative toxin transport-related membrane protein  
BPSL1665 putative toxin-related secretion protein  
BPSL1666 hypothetical protein  
BPSL1667 hypothetical protein  
BPSL1668 putative adenylylsulfate kinase  
BPSL1669 putative two component system, response regulator  
BPSL1670 putative transposase  
BPSL1671 putative exported protein  
BPSL1672 hypothetical protein  
BPSL1673 putative transposase (partial)  
BPSL1674 putative outer membrane porin protein precursor  
BPSL1675 putative transposase  
BPSL1676 putative exported histidine ammonia-lyase  
BPSL1677 putative transport-related, integral membrane protein  
BPSL1678 putative urocanate hydratase  
BPSL1679 conserved hypothetical protein  
BPSL1680 putative LysR-family transcriptional regulatory protein  
BPSL1681 putative allantoinase  
BPSL1682 putative aminohydrolase  
BPSL1683 conserved hypothetical protein (partial)  
BPSL1684 putative transposase (partial)  
BPSL1685 putative transposase (partial)  
BPSL1686 putative RNA polymerase sigma factor  
BPSL1687 putative membrane protein  
BPSL1688 putative membrane protein  
BPSL1689 putative membrane protein  
BPSL1690 conserved hypothetical protein  
BPSL1691 conserved hypothetical protein  
BPSL1692 putative exported protein  
BPSL1693 insertion element hypothetical protein (partial)  
BPSL1694 putative transposase (partial)  
BPSL1695 putative GntR-family transcriptional regulator  
BPSL1696 putative recombinase  
BPSL1697 putative recombinase (partial)  
BPSL1699 hypothetical protein  
BPSL1700 conserved hypothetical protein (partial)  
BPSL1702 putative invertase  
BPSL1703 transposase (partial)  
BPSL1704 transposase  
BPSL1704a hypothetical protein  
BPSL1705 putative membrane protein  
BPSL1706 putative HNS-like protein  
BPSL1707 putative exported oxidase  
BPSL1708 putative exported protein  
BPSL1708A putative insertion element (partial)  
BPSL1709 putative non-ribosomal peptide synthase (partial)  
BPSL1711 putative carbamoyl transferase  
BPSL1712 putative non-ribosomal antibiotic-related peptide synthase  
BPSL1713 putative acetyltransferase

BPSL1714 putative threonine aldolase  
BPSL1715 putative bifunctional protein (ligase and argininosuccinate lyase)  
BPSL1716 putative cysteine synthase  
BPSL1717 hypothetical protein  
BPSL1718 putative membrane protein  
BPSL1719 putative kinase  
BPSL1720 putative argininosuccinate lyase  
BPSL1721 putative argininosuccinate synthase  
BPSL1722 putative formyl transferase  
BPSL1723 hypothetical protein  
BPSL1724 putative histidinol-phosphate aminotransferase  
BPSL1727 putative non-ribosomal peptide synthase (thioesterase domain)  
BPSL1789 putative sugar kinase (pseudogene)  
BPSL1796 hypothetical protein  
BPSL1799 putative fimbrial chaperone  
BPSL1800 putative outer membrane usher protein precursor  
BPSL1801 putative type-1 fimbrial protein  
BPSL1812 putative membrane protein  
BPSL1822 putative membrane protein  
BPSL1823 putative ABC transport system, ATP-binding protein  
BPSL1824 putative ABC transport system, substrate-binding protein  
BPSL1829 putative methyl-accepting chemotaxis protein  
BPSL1889 putative lipoprotein  
BPSL1922 conserved hypothetical protein  
BPSL1934 putative exported protein  
BPSL1949 conserved hypothetical protein (partial)  
BPSL1972 putative antibiotic resistance membrane protein  
BPSL2006 putative signal peptide protease  
BPSL2007 putative membrane protein  
BPSL2022 putative drug-resistance related outer-membrane protein  
BPSL2037 hypothetical protein  
BPSL2038 putative exported protein  
BPSL2039 putative membrane protein  
BPSL2040 hypothetical protein  
BPSL2042 hypothetical protein  
BPSL2042A hypothetical protein  
BPSL2043 putative lipoprotein  
BPSL2044 hypothetical protein  
BPSL2048 conserved hypothetical protein  
BPSL2054 hypothetical protein  
BPSL2055 conserved hypothetical protein  
BPSL2059 putative exported protein  
BPSL2064 hypothetical protein  
BPSL2071 putative membrane protein  
BPSL2076 1,4-alpha-glucan branching enzyme  
BPSL2078 putative trehalose trehalohydrolase protein  
BPSL2081 conserved hypothetical protein  
BPSL2087A hypothetical protein  
BPSL2088 hypothetical protein

BPSL2089 putative phage protein (partial)  
BPSL2119 putative amino acid racemase  
BPSL2131 conserved hypothetical protein (pseudogene)  
BPSL2173 hypothetical protein  
BPSL2221 hypothetical protein  
BPSL2331 hypothetical protein  
BPSL2332 hypothetical protein  
BPSL2333 conserved hypothetical protein  
BPSL2334 conserved hypothetical protein  
BPSL2352 conserved hypothetical protein (pseudogene)  
BPSL2513 putative membrane protein  
BPSL2551 putative exported protein  
BPSL2558 hypothetical protein  
BPSL2568 hypothetical protein  
BPSL2569 putative exported protein  
BPSL2570 hypothetical protein  
BPSL2571 hypothetical protein  
BPSL2572 hypothetical protein  
BPSL2573 hypothetical protein  
BPSL2574 hypothetical protein  
BPSL2575 hypothetical protein  
BPSL2576 hypothetical protein  
BPSL2577 hypothetical protein  
BPSL2578 hypothetical protein  
BPSL2579 hypothetical protein  
BPSL2580 hypothetical protein  
BPSL2581 hypothetical protein  
BPSL2582 hypothetical protein  
BPSL2583 hypothetical protein  
BPSL2584 hypothetical protein  
BPSL2585 hypothetical protein  
BPSL2586 putative phage integrase  
BPSL2699 putative exported protein  
BPSL2702 putative membrane protein  
BPSL2767 putative flagellar transcriptional activator (partial)  
BPSL2768 hypothetical protein  
BPSL2773 putative glycosyltransferase protein  
BPSL2777 putative O-antigen translocase  
BPSL2784 putative membrane protein  
BPSL2859 conserved hypothetical protein  
BPSL3095 hypothetical protein  
BPSL3113 putative integrase (partial)  
BPSL3114 hypothetical protein  
BPSL3115 putative transcriptional regulator  
BPSL3118 putative restriction modification system methylase  
BPSL3255 putative membrane protein  
BPSL3257 putative plasmid recombinase  
BPSL3258 conserved hypothetical protein  
BPSL3259 putative plasmid conjugal transfer protein

BPSL3260 conserved hypothetical protein  
BPSL3261 hypothetical protein  
BPSL3262 putative plasmid conjugal transfer protein  
BPSL3263 putative plasmid conjugal transfer protein  
BPSL3264 putative plasmid conjugal transfer protein  
BPSL3265 putative plasmid conjugal transfer protein  
BPSL3266 hypothetical protein  
BPSL3267 hypothetical protein  
BPSL3268 putative membrane protein  
BPSL3269 hypothetical protein  
BPSL3270 putative plasmid replication protein  
BPSL3331 putative outer membrane protein  
BPSL3342 putative bacteriophage protein  
BPSL3344 putative bacteriophage integrase  
BPSL3346 hypothetical protein  
BPSL3347 putative bacteriophage-related lipoprotein  
BPSL3348 putative bacteriophage protein  
BPSL3349 putative membrane protein  
BPSL3350 putative membrane protein  
BPSL3351 putative bacteriophage coat protein  
BPSL3370 putative membrane protein  
BPSL3381 putative oxidoreductase (partial)  
BPSS0003 hypothetical protein  
BPSS0062 putative C4-dicarboxylate transport sensor kinase  
BPSS0068 hypothetical protein  
BPSS0069 transposase (pseudogene)  
BPSS0070 putative transposase  
BPSS0072 IS element hypothetical protein (pseudogene)  
BPSS0072A conserved hypothetical protein (partial)  
BPSS0075 putative ABC transport system, membrane protein  
BPSS0076 putative ABC transport system, membrane protein  
BPSS0077 putative ABC transport system, exported substrate-binding protein  
BPSS0085 putative membrane protein  
BPSS0086 putative cytochrome C oxidase-related protein  
BPSS0087 putative membrane protein  
BPSS0088 putative exported protein  
BPSS0090 putative exported protein  
BPSS0091 putative fimbrial protein  
BPSS0095 putative membrane protein  
BPSS0115 hypothetical protein  
BPSS0118 hypothetical protein  
BPSS0120 putative fimbrial usher protein  
BPSS0121 putative fimbrial chaperone  
BPSS0122 putative exported protein  
BPSS0123 putative exported protein  
BPSS0134 putative LysR-family transcriptional regulator  
BPSS0135 conserved hypothetical protein  
BPSS0136 putative membrane protein  
BPSS0137 putative exported protein

BPSS0138 putative membrane protein  
BPSS0139 putative pyridine nucleotide-disulphide oxidoreductase  
BPSS0167 putative membrane protein  
BPSS0174 putative chaperone  
BPSS0179 conserved hypothetical protein  
BPSS0180 conserved hypothetical protein  
BPSS0220 putative membrane protein  
BPSS0233 LysR-family regulatory protein (partial)  
BPSS0256 putative ABC ribose transport system, permease protein  
BPSS0283 putative membrane protein  
BPSS0285A putative outer membrane porin precursor (partial)  
BPSS0306 putative multifunctional polyketide-peptide syntase  
BPSS0326 putative transport-related membrane protein  
BPSS0379 hypothetical protein  
BPSS0380A hypothetical protein  
BPSS0380B hypothetical protein  
BPSS0384A hypothetical protein  
BPSS0385 hypothetical protein  
BPSS0392 IS element hypothetical protein (partial)  
BPSS0393 putative bacteriophage-related protein (partial)  
BPSS0395 hypothetical protein  
BPSS0397 bacteriophage protein Gp48  
BPSS0397A hypothetical protein  
BPSS0398 hypothetical protein  
BPSS0399 bacteriophage protein Gp46  
BPSS0400 putative bacteriophage protein  
BPSS0402 bacteriophage/transposase fusion protein  
BPSS0404 putative methylamine utilization protein  
BPSS0405 glycerophosphoryl diester phosphodiesterase family protein  
BPSS0406 hypothetical protein  
BPSS0407 insertion element hypothetical protein  
BPSS0412 hypothetical protein  
BPSS0413 hypothetical protein  
BPSS0416A hypothetical protein  
BPSS0425 putative heptosyltransferase (O-antigen related)  
BPSS0430 conserved hypothetical protein (pseudogene)  
BPSS0433 putative membrane protein  
BPSS0434 hypothetical protein  
BPSS0435 putative AraC-family transcriptional regulator  
BPSS0436 putative AraC-family regulatory protein  
BPSS0437 putative transporter protein  
BPSS0438 putative LysR-family transcriptional regulator  
BPSS0439 conserved hypothetical protein  
BPSS0440 putative membrane protein  
BPSS0441 conserved hypothetical protein  
BPSS0442 hypothetical protein  
BPSS0443 conserved hypothetical protein  
BPSS0444 non-heme chloroperoxidase  
BPSS0445 putative LysR-family transcriptional regulator (partial)

BPSS0447 conserved hypothetical protein  
BPSS0448 hypothetical protein  
BPSS0452 putative phosphoesterase  
BPSS0453 putative exported protein  
BPSS0454 putative exported protein  
BPSS0455 putative copper resistance-related lipoprotein  
BPSS0458 putative copper-resistance exported protein  
BPSS0460 putative methyl-accepting chemotaxis protein  
BPSS0470 putative glutamine amidotransferase  
BPSS0475 hypothetical protein  
BPSS0480 hypothetical protein  
BPSS0486 putative non-ribosomal peptide synthetase  
BPSS0488A putative transposase (partial)  
BPSS0489 putative exported protein  
BPSS0490 putative transposase (partial)  
BPSS0586 pyochelin synthetase  
BPSS0587 pyochelin synthetase  
BPSS0594 putative membrane protein  
BPSS0599 hypothetical protein  
BPSS0600 putative membrane protein  
BPSS0602 hypothetical protein  
BPSS0605 putative membrane protein  
BPSS0606 LysR family regulatory protein  
BPSS0607 aldehyde dehydrogenase family protein  
BPSS0608 TauD/TfdA family dioxygenase  
BPSS0609 thiamine pyrophosphate enzyme family protein  
BPSS0610 putative phosphoenolpyruvate phosphomutase  
BPSS0629 putative exported protein  
BPSS0637 conserved hypothetical protein (pseudogene)  
BPSS0652a hypothetical protein  
BPSS0653 transposase (partial)  
BPSS0654 putative X-Pro dipeptidyl-peptidase  
BPSS0655 conserved hypothetical protein  
BPSS0656 hypothetical protein  
BPSS0657 transposase (partial)  
BPSS0658 putative exported protein  
BPSS0659 conserved hypothetical protein  
BPSS0660 insertion sequence protein (partial)  
BPSS0661 putative insertion element protein (pseudogene)  
BPSS0663 putative exported protein  
BPSS0664 response regulator protein  
BPSS0664a putative response regulator protein (partial)  
BPSS0665 putative alpha-ketoglutarate-dependent taurine dioxygenase  
BPSS0666 putative collagenase  
BPSS0667 acetyltransferase (GNAT) family protein (partial)  
BPSS0686a hypothetical protein  
BPSS0712 conserved hypothetical protein  
BPSS0715 putative exported protein  
BPSS0716 hypothetical protein

BPSS0721a putative acetyltransferase (partial)  
BPSS0732 hypothetical protein  
BPSS0737 putative membrane protein  
BPSS0744 insertion element protein (partial)  
BPSS0745 hypothetical protein  
BPSS0746 putative lipase  
BPSS0768 hypothetical protein  
BPSS0773 LysR family regulatory protein (partial)  
BPSS0781 putative AMP-binding enzyme  
BPSS0796 putative surface-exposed protein  
BPSS0812 hypothetical protein  
BPSS0818 hypothetical protein  
BPSS0820 putative tRNA synthetase  
BPSS0850 conserved hypothetical protein  
BPSS0851 putative nitrilotriacetate monooxygenase component A  
BPSS0854 putative exported protein  
BPSS0857 hypothetical protein  
BPSS0858 N-carbamoyl-L-amino acid hydrolase (partial)  
BPSS0874 hypothetical protein  
BPSS0920 LysR family regulatory protein  
BPSS0921 putative peptidase  
BPSS0922 putative transporter protein  
BPSS0991 response regulator protein (pseudogene)  
BPSS0997 conserved hypothetical protein  
BPSS1002 putative hydroxymethylglutaryl-coenzyme A synthase  
BPSS1006 putative polyketide synthase  
BPSS1007 putative polyketide synthase  
BPSS1008 putative polyketide synthase  
BPSS1017 putative antibiotic resistance protein  
BPSS1028 putative iron uptake regulator protein  
BPSS1031 putative transmembrane sugar transport protein  
BPSS1032 putative sugar ABC transporter ATP-binding component  
BPSS1033 putative ABC periplasmic-binding sugar transport protein  
BPSS1035 hypothetical protein  
BPSS1037 putative sugar transport protein  
BPSS1049 hypothetical bacteriophage protein  
BPSS1050 hypothetical bacteriophage protein  
BPSS1060 hypothetical bacteriophage protein  
BPSS1063 putative bacteriophage terminase, ATPase subunit  
BPSS1092 conserved hypothetical protein  
BPSS1093 putative hydratase protein  
BPSS1097 putative capsule biosynthesis protein  
BPSS1098 conserved hypothetical protein  
BPSS1101 putative exported protein  
BPSS1104 putative phosphomethylpyrimidine kinase  
BPSS1108 putative NUDIX/MutT family protein  
BPSS1109 putative methyltransferase  
BPSS1110 putative gamma-butyrobetaine,2-oxoglutarate dioxygenase  
BPSS1111 putative membrane protein

BPSS1112 putative amino acid permease  
BPSS1135 putative hydroxyethylthioazole kinase  
BPSS1136 putative exported protein  
BPSS1137 putative membrane protein  
BPSS1141 hypothetical protein  
BPSS1143 putative formate hydrogenlyase/hydrogenase/NADH dehydrogenase subunit  
BPSS1153 hypothetical protein  
BPSS1166 putative transport/efflux protein  
BPSS1170 putative non-ribosomal peptide synthase/polyketide synthase  
BPSS1174 putative non-ribosomal peptide/polyketide synthase  
BPSS1177 hypothetical protein  
BPSS1179 hypothetical protein  
BPSS1185 putative shikimate transporter (partial)  
BPSS1185a hypothetical protein  
BPSS1187 hypothetical protein  
BPSS1188 putative non ribosomal peptide/polyketide synthase (pseudogene)  
BPSS1194 putative peptide synthase/polyketide synthase  
BPSS1195 putative non-ribosomal peptide synthase  
BPSS1197 putative non-ribosomal peptide synthase  
BPSS1202 conserved hypothetical protein  
BPSS1208 putative transposase (partial)  
BPSS1209 putative transposase  
BPSS1214 putative transcriptional regulator  
BPSS1215 putative sugar transporter  
BPSS1216 putative thiamine-phosphate pyrophosphorylase  
BPSS1226 hypothetical protein  
BPSS1255 putative LysR family transcriptional regulator  
BPSS1265 conserved hypothetical protein (pseudogene)  
BPSS1269 putative peptide synthase/polyketide synthase  
BPSS1293 putative lipoprotein  
BPSS1314 hypothetical protein  
BPSS1319 conserved hypothetical protein  
BPSS1371 putative AraC family transcriptional regulator  
BPSS1372 conserved hypothetical protein  
BPSS1374 putative glutathione-S-transferase  
BPSS1375 putative membrane protein  
BPSS1376 putative quinol oxidase subunit  
BPSS1377 putative ubiquinol cytochrome c cyanide insensitive terminal oxidase  
BPSS1378 putative membrane protein  
BPSS1379 putative transmembrane transporter protein  
BPSS1380 hypothetical protein  
BPSS1381 putative transmembrane phospholipase protein  
BPSS1382 putative Endonuclease/Exonuclease/phosphatase family protein  
BPSS1383 hypothetical protein  
BPSS1383a putative rotamase  
BPSS1384 putative membrane protein  
BPSS1384a transposase (partial)  
BPSS1385 putative ATP/GTP binding protein  
BPSS1386 putative ATP/GTP binding protein



BPSS1387 conserved hypothetical protein  
BPSS1388 putative membrane protein  
BPSS1389 hypothetical protein  
BPSS1390 putative type III secretion system protein  
BPSS1391 putative AraC family regulator of pathogenicity genes  
BPSS1392 putative type III secretion-associated protein  
BPSS1393 hypothetical protein  
BPSS1394 putative type III secretion associated protein  
BPSS1395 putative type III secretion-associated protein  
BPSS1396 hypothetical protein  
BPSS1397 putative type III secretion associated protein  
BPSS1398 hypothetical protein  
BPSS1399 hypothetical protein  
BPSS1400 putative type III secretion-associated protein  
BPSS1401 putative type III secretion-associated protein  
BPSS1402 hypothetical protein  
BPSS1403 putative type III secretion-associated protein  
BPSS1404 putative type III secretion-associated protein  
BPSS1405 putative type III secretion-associated protein  
BPSS1406 hypothetical protein  
BPSS1407 secretion-associated protein  
BPSS1408 hypothetical protein  
BPSS1409 hypothetical protein  
BPSS1410 conserved hypothetical protein  
BPSS1422 putative membrane protein  
BPSS1434 putative membrane protein  
BPSS1439 putative cell surface protein  
BPSS1450 putative nitric oxide reductase (pseudogene)  
BPSS1464 putative transmembrane NADPH flavoprotein  
BPSS1465 putative thiamine biosynthesis lipoprotein precursor  
BPSS1475 putative transmembrane sugar transporter  
BPSS1491 conserved hypothetical protein  
BPSS1492 hypothetical protein  
BPSS1493 hypothetical protein  
BPSS1511 putative membrane protein  
BPSS1516 hypothetical protein  
BPSS1518 putative transposase  
BPSS1519 transposase  
BPSS1528 hypothetical protein  
BPSS1539 hypothetical protein  
BPSS1580 putative cellulose biosynthesis protein  
BPSS1582a hypothetical protein  
BPSS1583 putative transcription regulator  
BPSS1590 hypothetical protein  
BPSS1603 putative secretion protein  
BPSS1609 conserved hypothetical protein  
BPSS1632 probable non-ribosomal peptide synthetase  
BPSS1633 probable non-ribosomal peptide synthetase  
BPSS1634 probable non-ribosomal peptide synthetase

BPSS1702 hypothetical protein  
BPSS1703 putative membrane protein  
BPSS1729 putative cytochrome C  
BPSS1730 putative membrane protein  
BPSS1732 putative membrane protein  
BPSS1774A putative phage-related tail protein (partial)  
BPSS1776 putative integrase (partial)  
BPSS1824 putative AraC-family transcriptional regulator  
BPSS1869 putative dehalogenase  
BPSS1882 putative acetyltransferase  
BPSS1929 putative outer membrane lipoprotein  
BPSS1951 putative ATP synthesis-related protein  
BPSS1964 conserved hypothetical protein  
BPSS1980 putative membrane protein  
BPSS1998 putative lipoprotein  
BPSS1999 putative transport related, membrane protein  
BPSS2000 putative exported protein  
BPSS2001 hypothetical protein  
BPSS2002 putative periplasmic amino acid-binding protein  
BPSS2004 putative IS element protein (partial)  
BPSS2005 putative transposase  
BPSS2006 hypothetical protein  
BPSS2007 conserved hypothetical protein  
BPSS2008 putative transposase (partial)  
BPSS2013 putative outer membrane protein  
BPSS2019 conserved hypothetical protein  
BPSS2020 conserved hypothetical protein  
BPSS2023 hypothetical protein  
BPSS2024 putative zinc-containing alcohol dehydrogenase  
BPSS2025 putative decarboxylase  
BPSS2027 putative exported protein  
BPSS2046 putative IS element transposase  
BPSS2047 putative chrolohydrolase  
BPSS2048 putative glutathione S-transferase  
BPSS2049 putative IS element transposase  
BPSS2050 hypothetical protein (partial)  
BPSS2051 putative DNA-binding protein  
BPSS2052 putative activator/secretion protein  
BPSS2053 putative cell surface protein  
BPSS2054 conserved hypothetical protein  
BPSS2055 conserved hypothetical protein  
BPSS2056 conserved hypothetical protein  
BPSS2058 putative ATP-binding inner membrane transport protein  
BPSS2059 conserved hypothetical protein  
BPSS2060 L-asparaginase  
BPSS2061 conserved hypothetical protein  
BPSS2061A putative transposase (partial)  
BPSS2062 acetyltransferase (GNAT) family protein  
BPSS2063 hypothetical protein

BPSS2064 putative porin protein  
BPSS2065 putative fatty aldehyde dehydrogenase  
BPSS2066 conserved hypothetical protein  
BPSS2067 putative aldose 1-epimerase  
BPSS2068 short chain dehydrogenase  
BPSS2069 ABC transporter, ATP-binding protein  
BPSS2070 branched-chain amino acid transport system permease  
BPSS2071 putative exported protein  
BPSS2072 mandelate racemase / muconate lactonizing enzyme  
BPSS2073 GntR family regulator protein  
BPSS2074 senescence marker protein-30 (SMP-30) family protein  
BPSS2074a conserved hypothetical protein (partial)  
BPSS2075 conserved hypothetical protein  
BPSS2076 transposase IS66 family protein (pseudogene)  
BPSS2079 putative DNA-binding protein  
BPSS2080 hypothetical protein  
BPSS2081 putative alpha-galactosidase  
BPSS2082 putative ABC transporter system permease  
BPSS2083 putative ABC transporter, permease protein  
BPSS2084 putative extracellular solute-binding protein  
BPSS2085 putative ABC transport system, ATP-binding protein  
BPSS2086 hypothetical protein  
BPSS2087 LacI family regulatory protein  
BPSS2088 transposase (partial)  
BPSS2089 putative exported protein  
BPSS2090 putative DNA-binding protein  
BPSS2091 hypothetical protein  
BPSS2092 hypothetical protein (partial)  
BPSS2103 hypothetical protein  
BPSS2111 putative FAD-dependent monooxygenase  
BPSS2148 putative IS element protein  
BPSS2148a transposase  
BPSS2166 hypothetical protein  
BPSS2178 conserved hypothetical protein  
BPSS2179 putative membrane protein  
BPSS2208 hypothetical protein  
BPSS2209 hypothetical protein  
BPSS2210 putative cation transport related protein  
BPSS2211 putative ATP-dependent DNA ligase  
BPSS2212 conserved hypothetical protein  
BPSS2213 putative membrane protein  
BPSS2214 catalase HPII  
BPSS2215 hypothetical protein  
BPSS2216 putative membrane protein  
BPSS2217 conserved hypothetical protein  
BPSS2218 RNA polymerase sigma-54 factor  
BPSS2219 putative lipoprotein  
BPSS2220 conserved hypothetical protein  
BPSS2221 conserved hypothetical protein

BPSS2222 hypothetical protein  
 BPSS2223 putative exported protein  
 BPSS2224 putative lipoprotein  
 BPSS2225 hypothetical protein  
 BPSS2226 hypothetical protein  
 BPSS2227 hypothetical protein  
 BPSS2227A conserved hypothetical protein  
 BPSS2228 hypothetical protein  
 BPSS2229 conserved hypothetical protein  
 BPSS2230 conserved hypothetical protein  
 BPSS2231 putative response regulator  
 BPSS2232 putative exported protein  
 BPSS2233 putative DNA glycosylase  
 BPSS2234 putative transport related, membrane protein  
 BPSS2235 putative Zinc-binding dehydrogenase  
 BPSS2240 hypothetical protein  
 BPSS2243 putative lipoprotein  
 BPSS2251 putative LPS biosynthesis related transferase  
 BPSS2259 putative fusion protein, ATP-binding transmembrane ABC transporter and regulatory protein  
 BPSS2297 conserved hypothetical protein  
 BPSS2298 conserved hypothetical protein  
 BPSS2328 putative multi-domain beta keto-acyl synthase

---

**Segment 6- Conserved in Bp and Bt but not as well or absent in Bm**

| Gene     | Description                                    | to Bt    |            |
|----------|------------------------------------------------|----------|------------|
|          |                                                | % length | % identity |
| BPSL0006 | putative exported protein                      | 100      | 91         |
| BPSL0020 | putative membrane protein                      | 100      | 87         |
| BPSL0030 | flagellar biosynthetic protein                 | 100      | 98         |
| BPSL0057 | putative membrane protein                      | 100      | 91         |
| BPSL0058 | fatty acid desaturase                          | 100      | 95         |
| BPSL0059 | hypothetical protein                           | 100      | 97         |
| BPSL0060 | AraC family transcriptional regulator          | 100      | 92         |
| BPSL0061 | putative acyl-CoA dehydrogenase                | 100      | 97         |
| BPSL0062 | beta-ketoadipyl CoA thiolase                   | 100      | 97         |
| BPSL0063 | putative fatty oxidation complex alpha subunit | 100      | 96         |
| BPSL0064 | alpha-methylacyl-CoA racemase                  | 100      | 97         |
| BPSL0065 | putative lipoprotein                           | 100      | 91         |
| BPSL0067 | hypothetical protein                           | 100      | 97         |
| BPSL0069 | putative transmembrane regulator               | 99       | 90         |
| BPSL0070 | putative RNA polymerase sigma factor           | 100      | 99         |
| BPSL0071 | putative catalase                              | 100      | 95         |
| BPSL0072 | putative type-b cytochrome                     | 100      | 94         |
| BPSL0082 | hypothetical protein                           | 100      | 92         |
| BPSL0093 | putative lipoprotein                           | 100      | 93         |
| BPSL0094 | putative lipoprotein                           | 100      | 96         |
| BPSL0096 | spermidine n(1)-acetyltransferase              | 100      | 94         |
| BPSL0097 | putative exported protein                      | 100      | 94         |
| BPSL0144 | putative phage protein                         | 100      | 97         |

|          |                                                                         |     |     |
|----------|-------------------------------------------------------------------------|-----|-----|
| BPSL0145 | putative phage protein                                                  | 100 | 98  |
| BPSL0147 | putative phage protein                                                  | 100 | 97  |
| BPSL0148 | putative phage protein                                                  | 100 | 100 |
| BPSL0149 | phage major tail tube protein                                           | 100 | 95  |
| BPSL0150 | phage major tail sheath protein                                         | 100 | 99  |
| BPSL0151 | putative phage tail fiber assembly protein                              | 100 | 98  |
| BPSL0152 | phage-related tail fiber protein                                        | 100 | 99  |
| BPSL0153 | putative phage protein                                                  | 100 | 98  |
| BPSL0154 | phage baseplate assembly protein                                        | 100 | 99  |
| BPSL0155 | phage baseplate assembly protein                                        | 100 | 99  |
| BPSL0156 | phage baseplate assembly protein                                        | 100 | 99  |
| BPSL0157 | phage-encoded modification methylase                                    | 98  | 94  |
| BPSL0159 | phage tail completion protein                                           | 100 | 94  |
| BPSL0160 | phage tail completion protein                                           | 100 | 97  |
| BPSL0161 | putative phage protein                                                  | 100 | 94  |
| BPSL0162 | putative phage-encoded lipoprotein                                      | 100 | 91  |
| BPSL0163 | putative phage-encoded peptidoglycan binding protein                    | 100 | 97  |
| BPSL0164 | putative phage-encoded membrane protein                                 | 100 | 98  |
| BPSL0165 | putative phage-encoded membrane protein                                 | 100 | 100 |
| BPSL0166 | phage tail protein                                                      | 100 | 100 |
| BPSL0167 | hypothetical phage protein                                              | 100 | 98  |
| BPSL0168 | phage head completion/stabilization protein                             | 100 | 91  |
| BPSL0169 | phage terminase, endonuclease subunit                                   | 100 | 100 |
| BPSL0170 | phage major capsid protein precursor                                    | 100 | 97  |
| BPSL0171 | putative phage capsid scaffolding protein                               | 100 | 99  |
| BPSL0172 | phage terminase, ATPase subunit                                         | 97  | 98  |
| BPSL0223 | putative acyl-CoA dehydrogenase                                         | 100 | 94  |
| BPSL0235 | putative export system protein                                          | 100 | 93  |
| BPSL0240 | sensor kinase protein (partial)                                         | 100 | 88  |
| BPSL0251 | putative dipeptide transport system permease protein                    | 100 | 97  |
| BPSL0283 | LysR family regulatory protein                                          | 100 | 95  |
| BPSL0288 | putative membrane protein                                               | 100 | 91  |
| BPSL0293 | putative glucosyltransferase                                            | 99  | 93  |
| BPSL0326 | putative outer membrane porin protein precursor                         | 100 | 94  |
| BPSL0327 | LysR family regulatory protein                                          | 100 | 98  |
| BPSL0328 | putative 2-nitropropane dioxygenase                                     | 100 | 98  |
| BPSL0329 | putative hydrolase                                                      | 100 | 97  |
| BPSL0330 | AsnC family regulatory protein                                          | 100 | 92  |
| BPSL0331 | putative membrane protein                                               | 100 | 93  |
| BPSL0332 | conserved hypothetical protein                                          | 100 | 95  |
| BPSL0333 | putative hydroxymethylglutaryl-CoA lyase                                | 100 | 94  |
| BPSL0334 | conserved hypothetical protein                                          | 100 | 92  |
| BPSL0335 | glyoxalase/bleomycin resistance protein/dioxygenase superfamily protein | 100 | 96  |
| BPSL0336 | conserved hypothetical protein                                          | 99  | 87  |
| BPSL0338 | non-hemolytic phospholipase C precursor                                 | 100 | 95  |
| BPSL0340 | AsnC family regulatory protein                                          | 100 | 94  |
| BPSL0341 | putative transport protein                                              | 100 | 94  |
| BPSL0342 | putative membrane protein                                               | 100 | 92  |
| BPSL0346 | dihydrodipicolinate synthetase family protein                           | 99  | 89  |

|          |                                                                |     |    |
|----------|----------------------------------------------------------------|-----|----|
| BPSL0352 | sulfate-binding protein precursor                              | 100 | 95 |
| BPSL0353 | putative exported protein                                      | 100 | 93 |
| BPSL0354 | putative exported protein                                      | 100 | 87 |
| BPSL0355 | putative inward rectifier potassium channel protein            | 100 | 88 |
| BPSL0356 | conserved hypothetical protein                                 | 100 | 95 |
| BPSL0357 | sodium/hydrogen exchanger family protein                       | 100 | 97 |
| BPSL0358 | hypothetical protein                                           | 100 | 95 |
| BPSL0368 | putative exported protein                                      | 100 | 94 |
| BPSL0426 | C4-dicarboxylate transport sensor protein                      | 100 | 94 |
| BPSL0435 | ammonium transporter family protein                            | 100 | 94 |
| BPSL0524 | putative lipoprotein                                           | 99  | 87 |
| BPSL0540 | putative adenine phosphoribosyltransferase                     | 100 | 95 |
| BPSL0541 | LysE type translocator                                         | 100 | 98 |
| BPSL0547 | single-strand binding protein                                  | 100 | 96 |
| BPSL0578 | dienelactone hydrolase family protein                          | 100 | 88 |
| BPSL0579 | hypothetical protein                                           | 100 | 91 |
| BPSL0580 | hypothetical protein                                           | 100 | 91 |
| BPSL0581 | conserved hypothetical protein                                 | 100 | 99 |
| BPSL0589 | conserved hypothetical protein                                 | 100 | 95 |
| BPSL0590 | putative membrane protein                                      | 100 | 93 |
| BPSL0594 | hypothetical protein                                           | 99  | 95 |
| BPSL0630 | D-aminoacylase                                                 | 100 | 94 |
| BPSL0662 | putative membrane protein                                      | 100 | 94 |
| BPSL0707 | conserved hypothetical protein                                 | 100 | 91 |
| BPSL0710 | putative ATP/GTP binding protein                               | 100 | 93 |
| BPSL0712 | putative ATP-binding transmembrane ABC transporter             | 100 | 87 |
| BPSL0713 | putative transmembrane transporter                             | 100 | 89 |
| BPSL0716 | conserved hypothetical protein                                 | 100 | 93 |
| BPSL0717 | conserved hypothetical protein                                 | 99  | 90 |
| BPSL0719 | putative membrane protein                                      | 100 | 91 |
| BPSL0732 | putative two-component regulator histidine sensor kinase       | 100 | 90 |
| BPSL0733 | putative exported protein                                      | 100 | 92 |
| BPSL0734 | putative two-component transcriptional response regulator      | 100 | 94 |
| BPSL0774 | two-component sensor kinase transcriptional regulatory protein | 100 | 94 |
| BPSL0786 | molybdenum cofactor biosynthesis protein c                     | 100 | 95 |
| BPSL0787 | putative exported protein                                      | 100 | 93 |
| BPSL0817 | putative permease protein                                      | 100 | 96 |
| BPSL0818 | putative sugar kinase protein                                  | 100 | 92 |
| BPSL0856 | putative thioredoxin protein                                   | 100 | 95 |
| BPSL0873 | conserved hypothetical protein                                 | 100 | 97 |
| BPSL0878 | putative tetraacyldisaccharide 4'-kinase                       | 100 | 98 |
| BPSL0881 | hypothetical protein                                           | 100 | 90 |
| BPSL0900 | putative amino acid permease                                   | 100 | 96 |
| BPSL1034 | conserved hypothetical protein                                 | 100 | 93 |
| BPSL1036 | putative two-component system, response regulator              | 100 | 98 |
| BPSL1042 | putative lipoprotein                                           | 100 | 94 |
| BPSL1043 | putative lipoprotein                                           | 100 | 93 |
| BPSL1123 | putative LPS core biosynthesis-related protein                 | 100 | 89 |
| BPSL1174 | two-component system, sensor kinase protein KdpD               | 100 | 91 |

|          |                                                          |     |     |
|----------|----------------------------------------------------------|-----|-----|
| BPSL1179 | putative membrane protein                                | 100 | 93  |
| BPSL1201 | 2-isopropylmalate synthase                               | 100 | 99  |
| BPSL1247 | putative aminopeptidase                                  | 99  | 90  |
| BPSL1248 | putative membrane protein                                | 100 | 95  |
| BPSL1249 | putative AraC-family transcriptional regulator           | 100 | 95  |
| BPSL1250 | D-3-phosphoglycerate dehydrogenase                       | 100 | 94  |
| BPSL1251 | putative transposase                                     | 100 | 88  |
| BPSL1253 | putative integral membrane protein/sensor kinase         | 100 | 95  |
| BPSL1254 | hypothetical protein                                     | 100 | 92  |
| BPSL1256 | putative cytochrome c precursor                          | 100 | 96  |
| BPSL1257 | putative cytochrome c precursor                          | 100 | 96  |
| BPSL1258 | putative membrane protein                                | 100 | 100 |
| BPSL1259 | putative cytochrome c oxidase subunit II related protein | 100 | 97  |
| BPSL1260 | cytochrome c oxidase subunit 1                           | 100 | 97  |
| BPSL1261 | putative cytochrome c related protein                    | 100 | 94  |
| BPSL1262 | conserved hypothetical protein                           | 100 | 96  |
| BPSL1263 | conserved hypothetical protein                           | 100 | 98  |
| BPSL1264 | AhpC/TSA family membrane protein                         | 99  | 96  |
| BPSL1265 | conserved hypothetical protein                           | 100 | 94  |
| BPSL1266 | putative transport system, membrane protein              | 100 | 97  |
| BPSL1267 | putative transport system, membrane protein              | 100 | 97  |
| BPSL1268 | putative transport system, membrane protein              | 100 | 92  |
| BPSL1269 | putative IclR-family transcriptional regulatory protein  | 100 | 97  |
| BPSL1286 | conserved hypothetical protein                           | 100 | 91  |
| BPSL1291 | putative exported protein                                | 100 | 88  |
| BPSL1338 | putative glutathione S-transferase related protein       | 100 | 95  |
| BPSL1382 | conserved hypothetical protein                           | 100 | 89  |
| BPSL1383 | putative undecaprenol kinase                             | 100 | 97  |
| BPSL1388 | hypothetical protein                                     | 100 | 95  |
| BPSL1389 | putative phage related protein (partial)                 | 100 | 96  |
| BPSL1427 | hypothetical protein                                     | 99  | 93  |
| BPSL1440 | putative exported protein                                | 100 | 95  |
| BPSL1449 | conserved hypothetical protein                           | 100 | 98  |
| BPSL1450 | 2-hydroxy-3-oxopropionate reductase                      | 100 | 94  |
| BPSL1451 | hydroxypyruvate isomerase                                | 100 | 92  |
| BPSL1452 | glyoxylate carbonylase                                   | 100 | 96  |
| BPSL1453 | putative LysR-family transcriptional regulator           | 100 | 98  |
| BPSL1476 | putative aminotransferase                                | 100 | 97  |
| BPSL1559 | putative membrane protein                                | 100 | 95  |
| BPSL1560 | hypothetical protein                                     | 100 | 94  |
| BPSL1561 | putative metallo-beta-lactamase family protein           | 100 | 95  |
| BPSL1562 | putative transcriptional regulatory protein              | 99  | 93  |
| BPSL1563 | putative membrane protein                                | 100 | 93  |
| BPSL1564 | putative transcriptional regulatory protein              | 99  | 94  |
| BPSL1618 | hypothetical protein                                     | 100 | 92  |
| BPSL1638 | putative phage-related protein (partial)                 | 99  | 93  |
| BPSL1767 | putative magnesium chelatase protein                     | 100 | 88  |
| BPSL1768 | putative cobalamin biosynthesis-related protein          | 100 | 95  |
| BPSL1797 | putative ABC transport system, membrane protein          | 100 | 89  |

|           |                                                             |     |    |
|-----------|-------------------------------------------------------------|-----|----|
| BPSL1798  | putative exported protein                                   | 99  | 91 |
| BPSL1802  | multidrug efflux system putative membrane lipoprotein       | 100 | 90 |
| BPSL1803  | multidrug efflux system transporter protein AmrB            | 100 | 98 |
| BPSL1804  | multidrug efflux system putative membrane fusion protein    | 100 | 95 |
| BPSL1805  | TetR family regulatory protein                              | 99  | 93 |
| BPSL1806  | hypothetical protein                                        | 100 | 86 |
| BPSL1807  | putative amino acid transport system, membrane protein      | 100 | 92 |
| BPSL1808  | putative amino acid transport system, membrane protein      | 100 | 88 |
| BPSL1809  | putative amino acid transport system, exported protein      | 100 | 94 |
| BPSL1810  | putative membrane protein                                   | 100 | 91 |
| BPSL1811  | putative membrane protein                                   | 100 | 92 |
| BPSL1813  | putative fimbriae-related membrane protein                  | 100 | 94 |
| BPSL1814  | putative membrane protein                                   | 100 | 90 |
| BPSL1815  | putative fimbriae assembly-related protein                  | 100 | 91 |
| BPSL1816  | putative fimbriae assembly-related protein                  | 100 | 93 |
| BPSL1817  | putative lipoprotein                                        | 100 | 92 |
| BPSL1818  | putative fimbriae assembly-related protein                  | 100 | 97 |
| BPSL1819  | putative fimbriae-assembly related protein                  | 100 | 90 |
| BPSL1820  | putative fimbriae assembly-related protein                  | 100 | 88 |
| BPSL1821  | putative fimbriae assembly-related protein                  | 100 | 96 |
| BPSL1825  | putative ABC transport system, permease protein             | 100 | 97 |
| BPSL1826  | conserved hypothetical protein                              | 100 | 98 |
| BPSL1827  | conserved hypothetical protein                              | 100 | 98 |
| BPSL1828  | conserved hypothetical protein                              | 100 | 99 |
| BPSL1830  | putative ribokinase                                         | 100 | 92 |
| BPSL1831  | putative ribose operon repressor                            | 100 | 99 |
| BPSL1832  | putative ribose transport system, permease protein          | 100 | 97 |
| BPSL1833  | putative ribose transport system, ATP-binding protein       | 100 | 94 |
| BPSL1834  | putative ribose transport system, substrate-binding protein | 100 | 98 |
| BPSL1885A | Hfq protein                                                 | 100 | 90 |
| BPSL1892  | putative fimbriae-related outer membrane protein            | 100 | 93 |
| BPSL1893  | putative type II/IV secretion system ATP-binding protein    | 100 | 97 |
| BPSL1899  | putative fimbriae assembly related protein                  | 100 | 98 |
| BPSL1900  | hypothetical protein                                        | 100 | 91 |
| BPSL1901  | putative membrane protein                                   | 100 | 90 |
| BPSL1936  | putative membrane protein                                   | 99  | 87 |
| BPSL1963  | putative membrane protein                                   | 100 | 96 |
| BPSL2015  | putative membrane attached glycosyl hydrolase               | 100 | 93 |
| BPSL2027  | putative fimbriae-related protein                           | 100 | 90 |
| BPSL2041  | conserved hypothetical protein                              | 98  | 94 |
| BPSL2045  | putative lipoprotein                                        | 100 | 98 |
| BPSL2046  | conserved hypothetical protein                              | 100 | 96 |
| BPSL2047  | conserved hypothetical protein                              | 100 | 95 |
| BPSL2048A | conserved hypothetical protein                              | 98  | 86 |
| BPSL2086  | hypothetical protein                                        | 100 | 95 |
| BPSL2087  | conserved hypothetical protein (partial)                    | 100 | 97 |
| BPSL2109  | putative glyoxylate-related oxidoreductase                  | 100 | 94 |
| BPSL2110  | conserved hypothetical protein                              | 100 | 95 |
| BPSL2111  | putative LysR-family transcriptional regulator              | 100 | 99 |



|          |                                                                                |     |     |
|----------|--------------------------------------------------------------------------------|-----|-----|
| BPSL2112 | putative amino hydrolase                                                       | 100 | 93  |
| BPSL2113 | putative purine catabolism-related protein                                     | 100 | 94  |
| BPSL2114 | putative membrane protein                                                      | 100 | 96  |
| BPSL2229 | putative siderophore non-ribosomal peptide synthase                            | 100 | 86  |
| BPSL2254 | putative FkbP-type peptidyl-prolyl cis-trans isomerase                         | 100 | 98  |
| BPSL2268 | putative lipoprotein                                                           | 100 | 89  |
| BPSL2300 | dihydrolipoamide acetyltransferase component of pyruvate dehydrogenase complex | 100 | 95  |
| BPSL2335 | aminotransferase class-III                                                     | 100 | 92  |
| BPSL2369 | conserved hypothetical protein                                                 | 100 | 97  |
| BPSL2370 | probable ATP-dependent transporter protein                                     | 100 | 93  |
| BPSL2377 | conserved hypothetical protein                                                 | 99  | 88  |
| BPSL2379 | ubiquinol oxidase polypeptide I                                                | 100 | 95  |
| BPSL2380 | cytochrome o ubiquinol oxidase subunit III                                     | 100 | 97  |
| BPSL2394 | histidine transport system permease protein                                    | 100 | 95  |
| BPSL2395 | putative lipoprotein                                                           | 100 | 96  |
| BPSL2407 | putative membrane protein                                                      | 100 | 86  |
| BPSL2450 | haloacid dehalogenase-like hydrolase                                           | 100 | 97  |
| BPSL2498 | putative acyl-CoA dehydrogenase                                                | 100 | 97  |
| BPSL2556 | possible DNA polymerase/helicase                                               | 100 | 91  |
| BPSL2557 | cold shock-like protein                                                        | 100 | 100 |
| BPSL2598 | putative acetyltransferase protein                                             | 100 | 98  |
| BPSL2653 | putative branched-chain amino acid transport system, permease component        | 100 | 96  |
| BPSL2660 | urease accessory protein                                                       | 100 | 91  |
| BPSL2722 | membrane transport solute-binding protein                                      | 100 | 95  |
| BPSL2741 | conserved hypothetical protein                                                 | 100 | 98  |
| BPSL2769 | putative UTP-glucose-1-phosphate uridylyltransferase                           | 100 | 96  |
| BPSL2770 | putative capsule expression protein                                            | 100 | 91  |
| BPSL2771 | putative haloacid dehalogenase-like hydrolase protein                          | 100 | 92  |
| BPSL2772 | putative 2-dehydro-3-deoxyphosphooctonate aldolase                             | 100 | 92  |
| BPSL2774 | hypothetical protein                                                           | 100 | 88  |
| BPSL2775 | putative colanic acid biosynthesis acetyltransferase                           | 100 | 92  |
| BPSL2776 | hypothetical protein                                                           | 100 | 88  |
| BPSL2778 | putative tyrosine-protein kinase involved in EPS biosynthesis                  | 100 | 92  |
| BPSL2779 | putative protein-tyrosine-phosphatase (low molecular weight)                   | 100 | 92  |
| BPSL2780 | putative capsular polysaccharide transport protein                             | 100 | 91  |
| BPSL2781 | putative transmembrane sugar transferase                                       | 100 | 96  |
| BPSL2782 | putative AraC family transcriptional regulator                                 | 100 | 93  |
| BPSL2783 | putative membrane protein                                                      | 100 | 86  |
| BPSL2785 | putative exported protein                                                      | 100 | 93  |
| BPSL2881 | putative membrane protein                                                      | 100 | 97  |
| BPSL2924 | glutamate/aspartate periplasmic binding protein precursor                      | 100 | 99  |
| BPSL2939 | putative transport-related membrane protein                                    | 98  | 86  |
| BPSL2944 | putative ureidoglycolate hydrolase                                             | 100 | 96  |
| BPSL2990 | histone H1-like protein                                                        | 100 | 92  |
| BPSL3037 | long-chain-fatty-acid--CoA ligase                                              | 100 | 98  |
| BPSL3038 | putative molybdopterin-containing oxidoreductase                               | 100 | 93  |
| BPSL3044 | phenylacetic acid degradation protein Paal                                     | 100 | 93  |
| BPSL3105 | conserved hypothetical protein                                                 | 100 | 98  |
| BPSL3106 | conserved hypothetical protein                                                 | 100 | 99  |

|           |                                                |     |     |
|-----------|------------------------------------------------|-----|-----|
| BPSL3107  | conserved hypothetical protein                 | 100 | 98  |
| BPSL3108  | putative lipoprotein                           | 100 | 91  |
| BPSL3109  | putative lipoprotein                           | 100 | 98  |
| BPSL3110  | conserved hypothetical protein                 | 100 | 98  |
| BPSL3111  | putative membrane protein                      | 100 | 98  |
| BPSL3237  | conserved hypothetical protein                 | 100 | 96  |
| BPSL3250  | putative LysR-family transcriptional regulator | 100 | 95  |
| BPSL3251  | putative inner membrane transport protein      | 100 | 91  |
| BPSL3252  | putative amino acid transport protein          | 100 | 89  |
| BPSL3253  | putative oxidoreductase                        | 100 | 95  |
| BPSL3254  | conserved hypothetical protein                 | 99  | 93  |
| BPSL3254A | putative membrane protein                      | 100 | 90  |
| BPSL3254B | putative exported protein                      | 100 | 88  |
| BPSL3285  | putative oxidoreductase                        | 100 | 90  |
| BPSL3293  | flagellar biosynthesis protein FlhF            | 100 | 94  |
| BPSL3297  | Gly/Ala/Ser-rich lipoprotein                   | 100 | 91  |
| BPSL3306  | chemotaxis two-component sensor kinase CheA    | 100 | 92  |
| BPSL3308  | chemotaxis protein MotB                        | 100 | 95  |
| BPSL3343  | putative bacteriophage protein                 | 100 | 98  |
| BPSL3345  | putative bacteriophage-related protein         | 100 | 98  |
| BPSL3352  | hypothetical protein                           | 100 | 97  |
| BPSL3353  | putative DNA-binding protein                   | 100 | 97  |
| BPSL3372  | ethanolamine ammonia-lyase heavy chain         | 100 | 97  |
| BPSL3429  | putative NADH-dependent flavin oxidoreductase  | 100 | 94  |
| BPSS0064  | putative membrane protein                      | 99  | 86  |
| BPSS0073  | putative regulatory protein                    | 100 | 97  |
| BPSS0074  | hypothetical protein                           | 99  | 96  |
| BPSS0077A | putative HNS-like regulatory protein           | 100 | 95  |
| BPSS0078  | conserved hypothetical protein                 | 100 | 94  |
| BPSS0079  | conserved hypothetical protein                 | 100 | 91  |
| BPSS0080  | conserved hypothetical protein                 | 100 | 97  |
| BPSS0080a | conserved hypothetical protein                 | 100 | 95  |
| BPSS0081  | conserved hypothetical protein                 | 100 | 100 |
| BPSS0082  | putative thioredoxin                           | 100 | 99  |
| BPSS0083  | putative exported protein                      | 100 | 98  |
| BPSS0084  | putative porin-related protein (partial)       | 100 | 100 |
| BPSS0089  | putative exported protein                      | 100 | 88  |
| BPSS0092  | putative fimbria-related chaperone             | 100 | 91  |
| BPSS0093  | outer membrane usher protein                   | 100 | 92  |
| BPSS0094  | putative fimbria subunit protein               | 100 | 86  |
| BPSS0096  | OmpA family membrane protein                   | 100 | 86  |
| BPSS0097  | conserved hypothetical protein                 | 100 | 98  |
| BPSS0098  | conserved hypothetical protein                 | 100 | 99  |
| BPSS0099  | conserved hypothetical protein                 | 100 | 96  |
| BPSS0100  | putative exported protein                      | 100 | 94  |
| BPSS0101  | conserved hypothetical protein                 | 100 | 99  |
| BPSS0102  | OmpA family membrane protein                   | 100 | 95  |
| BPSS0103  | putative membrane protein                      | 100 | 93  |
| BPSS0104  | hypothetical protein                           | 100 | 94  |

|          |                                                               |     |     |
|----------|---------------------------------------------------------------|-----|-----|
| BPSS0105 | conserved hypothetical protein                                | 98  | 98  |
| BPSS0106 | putative Rhs-like protein (pseudogene)                        | 100 | 92  |
| BPSS0108 | conserved hypothetical protein                                | 100 | 91  |
| BPSS0109 | putative exported protein                                     | 100 | 90  |
| BPSS0110 | conserved hypothetical protein                                | 100 | 90  |
| BPSS0111 | conserved hypothetical protein                                | 100 | 95  |
| BPSS0112 | conserved hypothetical protein                                | 100 | 99  |
| BPSS0113 | conserved hypothetical protein                                | 99  | 94  |
| BPSS0114 | conserved hypothetical protein                                | 100 | 92  |
| BPSS0116 | putative chaperone-related protein                            | 100 | 95  |
| BPSS0117 | putative histidine kinase/response regulator fusion protein   | 100 | 89  |
| BPSS0119 | putative two-component system response regulator              | 100 | 90  |
| BPSS0124 | putative response regulator                                   | 100 | 86  |
| BPSS0125 | putative regulatory protein                                   | 99  | 91  |
| BPSS0126 | putative transport system, membrane protein                   | 100 | 94  |
| BPSS0127 | glycerate kinase 1                                            | 100 | 93  |
| BPSS0128 | pyruvate kinase                                               | 100 | 95  |
| BPSS0129 | putative transcriptional regulator                            | 100 | 93  |
| BPSS0130 | putative peptide synthase protein                             | 100 | 93  |
| BPSS0131 | putative dehydratase                                          | 100 | 92  |
| BPSS0132 | conserved hypothetical protein                                | 100 | 94  |
| BPSS0133 | putative methyltransferase                                    | 100 | 90  |
| BPSS0140 | putative sugar ABC transport system, lipoprotein              | 100 | 94  |
| BPSS0141 | putative sugar ABC transport system, membrane protein         | 100 | 95  |
| BPSS0142 | putative sugar ABC transport system, ATP-binding protein      | 100 | 94  |
| BPSS0143 | putative ROK family transcriptional regulator                 | 100 | 95  |
| BPSS0144 | putative amylase                                              | 100 | 94  |
| BPSS0147 | putative transporter protein                                  | 100 | 96  |
| BPSS0216 | putative membrane protein                                     | 100 | 88  |
| BPSS0224 | putative cation-transporting ATPase membrane protein          | 100 | 88  |
| BPSS0265 | putative porin-related protein                                | 100 | 97  |
| BPSS0282 | putative GntR-family regulatory protein                       | 100 | 91  |
| BPSS0305 | putative ketol-acid reductoisomerase                          | 100 | 94  |
| BPSS0330 | putative amino-acid permease membrane protein                 | 100 | 95  |
| BPSS0338 | putative insertion element protein                            | 100 | 92  |
| BPSS0351 | putative copper-related MerR-family transcriptional regulator | 100 | 92  |
| BPSS0374 | putative membrane protein                                     | 100 | 96  |
| BPSS0376 | putative membrane protein                                     | 100 | 91  |
| BPSS0378 | putative phage integrase                                      | 100 | 98  |
| BPSS0380 | putative DNA-binding regulatory protein                       | 100 | 96  |
| BPSS0381 | putative DNA-binding regulatory protein                       | 100 | 100 |
| BPSS0382 | hypothetical protein                                          | 100 | 94  |
| BPSS0383 | putative DNA-binding protein                                  | 100 | 100 |
| BPSS0384 | hypothetical protein                                          | 99  | 94  |
| BPSS0386 | transposon Tn2501 resolvase                                   | 100 | 99  |
| BPSS0387 | putative phage-related protein                                | 100 | 99  |
| BPSS0388 | putative phage-related protein                                | 100 | 99  |
| BPSS0389 | putative phage-related protein                                | 100 | 96  |
| BPSS0390 | conserved hypothetical protein                                | 100 | 100 |

|           |                                                             |     |    |
|-----------|-------------------------------------------------------------|-----|----|
| BPSS0391  | putative phage-related hypothetical protein                 | 100 | 99 |
| BPSS0391A | hypothetical protein                                        | 100 | 95 |
| BPSS0394  | conserved hypothetical protein                              | 100 | 98 |
| BPSS0396  | bacteriophage protein Gp49                                  | 100 | 89 |
| BPSS0401  | bacteriophage protein Gp44                                  | 100 | 87 |
| BPSS0408  | putative exported protein                                   | 100 | 95 |
| BPSS0409  | hypothetical protein                                        | 100 | 97 |
| BPSS0410  | hypothetical protein                                        | 100 | 96 |
| BPSS0411  | hypothetical protein                                        | 97  | 93 |
| BPSS0414  | putative acetolactate synthase                              | 100 | 88 |
| BPSS0415  | putative lipoprotein                                        | 100 | 87 |
| BPSS0416  | putative lipoprotein                                        | 100 | 92 |
| BPSS0417  | hypothetical protein                                        | 100 | 91 |
| BPSS0418  | putative transport-related membrane protein                 | 100 | 91 |
| BPSS0419  | glucose-1-phosphate cytidyltransferase (O-antigen-related)  | 100 | 98 |
| BPSS0420  | CDP-glucose 4,6-dehydratase (O-antigen-related)             | 100 | 90 |
| BPSS0421  | lipopolysaccharide biosynthesis protein (O-antigen-related) | 100 | 94 |
| BPSS0422  | putative aminotransferase                                   | 100 | 93 |
| BPSS0423  | putative membrane protein                                   | 100 | 89 |
| BPSS0424  | putative glycosyl transferase                               | 97  | 86 |
| BPSS0426  | putative heptosyltransferase (O-antigen related)            | 100 | 91 |
| BPSS0427  | putative O-acetyl transferase (O-antigen-related)           | 100 | 94 |
| BPSS0428  | putative glycosyl transferase (O-antigen related)           | 100 | 90 |
| BPSS0429  | putative membrane protein                                   | 100 | 90 |
| BPSS0431  | putative LysR-family transcriptional regulator              | 100 | 90 |
| BPSS0432  | conserved hypothetical protein                              | 100 | 95 |
| BPSS0446  | conserved hypothetical protein                              | 100 | 93 |
| BPSS0449  | putative GntR-family regulatory protein                     | 100 | 93 |
| BPSS0450  | DJ-1/Pfpl family protein                                    | 100 | 91 |
| BPSS0451  | penicillin-binding protein                                  | 100 | 87 |
| BPSS0456  | putative exported copper oxidase                            | 100 | 97 |
| BPSS0457  | putative exported protein                                   | 99  | 88 |
| BPSS0459  | putative copper-resistance membrane protein                 | 100 | 89 |
| BPSS0461  | putative oxidoreductase                                     | 100 | 93 |
| BPSS0462  | putative oxidoreductase                                     | 100 | 92 |
| BPSS0463  | putative exported protein                                   | 100 | 94 |
| BPSS0464  | putrescine transport system permease protein                | 100 | 94 |
| BPSS0465  | putrescine ABC transport system, permease protein           | 100 | 95 |
| BPSS0466  | putrescine ABC transport system, ATP-binding protein        | 100 | 97 |
| BPSS0467  | putrescine ABC transport system, binding exported protein   | 100 | 97 |
| BPSS0468  | putative aminotransferase                                   | 100 | 94 |
| BPSS0469  | putative glutamine synthetase                               | 100 | 96 |
| BPSS0471  | hypothetical protein                                        | 100 | 88 |
| BPSS0472  | putative MerR-family transcriptional regulator              | 100 | 97 |
| BPSS0473  | putative aldehyde dehydrogenase                             | 100 | 96 |
| BPSS0474  | agmatinase                                                  | 100 | 93 |
| BPSS0476  | 10 kDa chaperonin                                           | 100 | 96 |
| BPSS0477  | 60 kDa chaperonin                                           | 100 | 97 |
| BPSS0478  | putative membrane protein                                   | 99  | 93 |

|          |                                                                                   |     |    |
|----------|-----------------------------------------------------------------------------------|-----|----|
| BPSS0479 | putative ribonucleotide reductase protein                                         | 100 | 96 |
| BPSS0481 | putative CoA ligase                                                               | 100 | 91 |
| BPSS0482 | putative exported protein                                                         | 100 | 86 |
| BPSS0483 | putative beta-ketoacyl-ACP synthase                                               | 100 | 94 |
| BPSS0484 | 3-oxoacyl-[acyl-carrier-protein] synthase III                                     | 100 | 96 |
| BPSS0485 | putative metallo-beta lactamase-related protein                                   | 100 | 89 |
| BPSS0487 | hypothetical protein                                                              | 100 | 92 |
| BPSS0488 | putative membrane protein                                                         | 100 | 88 |
| BPSS0491 | alkyl hydroperoxide reductase subunit                                             | 100 | 90 |
| BPSS0516 | conserved hypothetical protein                                                    | 100 | 97 |
| BPSS0561 | conserved hypothetical protein                                                    | 100 | 93 |
| BPSS0572 | putative short-chain dehydrogenase                                                | 100 | 93 |
| BPSS0573 | hypothetical protein                                                              | 100 | 95 |
| BPSS0574 | putative FAD dependent oxidoreductase                                             | 100 | 93 |
| BPSS0575 | leucine-, isoleucine-, valine-, threonine-, and alanine-binding protein precursor | 100 | 97 |
| BPSS0576 | high-affinity branched-chain amino acid transport system permease protein         | 100 | 97 |
| BPSS0577 | high-affinity branched-chain amino acid transport system permease protein         | 100 | 95 |
| BPSS0578 | high-affinity branched-chain amino acid transport ATP-binding protein             | 100 | 97 |
| BPSS0579 | high-affinity branched-chain amino acid transport ATP-binding protein             | 100 | 97 |
| BPSS0580 | putative peptidase                                                                | 100 | 93 |
| BPSS0581 | putative salicylate biosynthesis isochorismate synthase                           | 100 | 87 |
| BPSS0582 | salicylate biosynthesis protein                                                   | 100 | 92 |
| BPSS0583 | pyochelin biosynthetic protein                                                    | 100 | 90 |
| BPSS0584 | salicyl-AMP ligase                                                                | 100 | 92 |
| BPSS0585 | AraC family regulatory protein                                                    | 100 | 95 |
| BPSS0588 | pyochelin biosynthetic protein                                                    | 100 | 88 |
| BPSS0589 | putative ATP-binding component of ABC transporter                                 | 100 | 90 |
| BPSS0590 | probable ATP-binding component of ABC transporter                                 | 100 | 88 |
| BPSS0591 | Fe(III)-pyochelin receptor precursor                                              | 100 | 92 |
| BPSS0592 | putative membrane protein                                                         | 99  | 86 |
| BPSS0593 | putative iron-regulated membrane protein                                          | 100 | 89 |
| BPSS0595 | 2Fe-2S iron-sulfur                                                                | 100 | 98 |
| BPSS0596 | sigma-54 activated regulatory protein                                             | 100 | 93 |
| BPSS0597 | putative membrane protein                                                         | 100 | 92 |
| BPSS0598 | conserved hypothetical protein                                                    | 100 | 98 |
| BPSS0601 | putative permease protein                                                         | 100 | 97 |
| BPSS0603 | hypothetical protein                                                              | 97  | 90 |
| BPSS0604 | hypothetical protein                                                              | 100 | 87 |
| BPSS0611 | putative membrane protein                                                         | 100 | 93 |
| BPSS0612 | putative oxidoreductase                                                           | 100 | 96 |
| BPSS0613 | conserved hypothetical protein                                                    | 100 | 94 |
| BPSS0614 | putative membrane protein                                                         | 100 | 95 |
| BPSS0615 | putative membrane protein                                                         | 100 | 89 |
| BPSS0616 | AraC family regulatory protein                                                    | 100 | 94 |
| BPSS0617 | acyl-CoA dehydrogenase                                                            | 100 | 98 |
| BPSS0618 | AMP-binding enzyme                                                                | 100 | 94 |
| BPSS0619 | methylmalonate-semialdehyde dehydrogenase                                         | 100 | 96 |
| BPSS0620 | 3-hydroxyisobutyrate dehydrogenase                                                | 100 | 97 |
| BPSS0621 | enoyl-CoA hydratase/isomerase family protein                                      | 100 | 95 |

|          |                                                              |     |     |
|----------|--------------------------------------------------------------|-----|-----|
| BPSS0622 | enoyl-CoA hydratase/isomerase family                         | 99  | 93  |
| BPSS0623 | outer membrane efflux protein                                | 100 | 90  |
| BPSS0624 | macrolide-specific ABC-type efflux carrier                   | 100 | 95  |
| BPSS0625 | putative drug-efflux protein                                 | 100 | 92  |
| BPSS0626 | luciferase-like monooxygenase                                | 100 | 96  |
| BPSS0627 | putative ribonuclease                                        | 100 | 95  |
| BPSS0646 | putative membrane protein                                    | 100 | 90  |
| BPSS0678 | response regulator protein (partial)                         | 100 | 86  |
| BPSS0698 | 2,4-dihydroxyhept-2-ene-1,7-dioic acid aldolase              | 100 | 95  |
| BPSS0703 | putative transmembrane ABC transporter protein               | 100 | 95  |
| BPSS0710 | enoyl-CoA hydratase/isomerase family protein                 | 98  | 94  |
| BPSS0711 | alanine racemase, catabolic                                  | 100 | 91  |
| BPSS0713 | conserved hypothetical protein                               | 100 | 93  |
| BPSS0714 | conserved hypothetical protein                               | 100 | 93  |
| BPSS0733 | putative methyl-accepting chemotaxis protein                 | 98  | 94  |
| BPSS0852 | putative inosine-uridine preferring nucleoside hydrolase     | 100 | 93  |
| BPSS0853 | putative ribokinase                                          | 100 | 92  |
| BPSS0855 | conserved hypothetical protein                               | 100 | 91  |
| BPSS0856 | conserved hypothetical protein                               | 100 | 94  |
| BPSS0919 | conserved hypothetical protein                               | 100 | 87  |
| BPSS0923 | putative hydrolase                                           | 100 | 92  |
| BPSS0924 | putative membrane protein                                    | 100 | 96  |
| BPSS0925 | short chain dehydrogenase                                    | 100 | 94  |
| BPSS0926 | flavin-binding monooxygenase-like protein                    | 100 | 96  |
| BPSS1034 | putative membrane protein                                    | 100 | 89  |
| BPSS1036 | putative Acyl-CoA dehydrogenase                              | 100 | 90  |
| BPSS1047 | hypothetical bacteriophage protein                           | 100 | 100 |
| BPSS1048 | hypothetical bacteriophage protein                           | 100 | 100 |
| BPSS1051 | hypothetical bacteriophage protein                           | 100 | 98  |
| BPSS1052 | hypothetical bacteriophage replication protein               | 100 | 99  |
| BPSS1053 | hypothetical bacteriophage-acquired protein                  | 100 | 97  |
| BPSS1054 | hypothetical bacteriophage-acquired protein                  | 100 | 98  |
| BPSS1055 | putative partition protein                                   | 100 | 99  |
| BPSS1056 | copG family protein                                          | 98  | 100 |
| BPSS1057 | putative bacteriophage gp29 protein                          | 100 | 99  |
| BPSS1058 | putative bacteriophage gp30 protein                          | 100 | 98  |
| BPSS1059 | putative bacteriophage gp31 protein                          | 100 | 98  |
| BPSS1064 | putative bacteriophage protein                               | 100 | 98  |
| BPSS1065 | putative major capsid protein precursor                      | 100 | 99  |
| BPSS1066 | putative bacteriophage terminase, endonuclease subunit       | 100 | 99  |
| BPSS1067 | putative bacteriophage head completion/stabilization protein | 100 | 92  |
| BPSS1068 | hypothetical bacteriophage protein                           | 100 | 98  |
| BPSS1069 | putative bacteriophage tail protein X                        | 100 | 100 |
| BPSS1070 | putative bacteriophage membrane protein                      | 100 | 100 |
| BPSS1071 | putative bacteriophage membrane protein                      | 100 | 98  |
| BPSS1072 | putative bacteriophage-acquired protein                      | 100 | 98  |
| BPSS1073 | putative bacteriophage protein                               | 100 | 91  |
| BPSS1074 | putative bacteriophage tail completion protein R             | 100 | 100 |
| BPSS1075 | putative bacteriophage tail completion protein S             | 100 | 100 |

|          |                                                                                  |     |     |
|----------|----------------------------------------------------------------------------------|-----|-----|
| BPSS1076 | hypothetical bacteriophage protein                                               | 100 | 100 |
| BPSS1077 | putative site-specific DNA methyltransferase                                     | 100 | 98  |
| BPSS1078 | putative bacteriophage baseplate assembly protein V                              | 100 | 96  |
| BPSS1079 | putative bacteriophage baseplate assembly protein W                              | 100 | 100 |
| BPSS1080 | putative bacteriophage baseplate assembly protein J                              | 100 | 95  |
| BPSS1081 | putative bacteriophage tail protein I                                            | 100 | 99  |
| BPSS1082 | putative bacteriophage protein gp17                                              | 100 | 98  |
| BPSS1083 | putative bacteriophage-acquired protein                                          | 100 | 99  |
| BPSS1084 | putative bacteriophage major tail sheath protein                                 | 100 | 99  |
| BPSS1085 | putative bacteriophage major tail tube protein                                   | 100 | 94  |
| BPSS1086 | putative bacteriophage protein                                                   | 100 | 100 |
| BPSS1087 | putative bacteriophage membrane protein                                          | 100 | 99  |
| BPSS1088 | putative bacteriophage tail-related protein                                      | 100 | 98  |
| BPSS1089 | putative bacteriophage late control gene D protein                               | 100 | 98  |
| BPSS1090 | putative alanine dehydrogenase                                                   | 100 | 96  |
| BPSS1091 | conserved hypothetical protein                                                   | 100 | 97  |
| BPSS1094 | conserved hypothetical protein                                                   | 100 | 92  |
| BPSS1095 | putative heat-shock chaperone protein                                            | 100 | 94  |
| BPSS1096 | putative chaperone heat-shock protein                                            | 100 | 91  |
| BPSS1099 | putative membrane protein                                                        | 99  | 89  |
| BPSS1100 | putative cation transport ATPase protein                                         | 100 | 91  |
| BPSS1102 | conserved hypothetical protein                                                   | 99  | 90  |
| BPSS1103 | putative periplasmic thiamine binding protein                                    | 100 | 92  |
| BPSS1105 | putative methyltransferase protein                                               | 100 | 89  |
| BPSS1106 | putative thymidylate synthase protein                                            | 100 | 91  |
| BPSS1107 | hypothetical protein                                                             | 100 | 93  |
| BPSS1115 | hypothetical protein                                                             | 100 | 88  |
| BPSS1123 | conserved hypothetical protein                                                   | 100 | 97  |
| BPSS1124 | conserved hypothetical protein                                                   | 100 | 98  |
| BPSS1125 | putative riboflavin biosynthesis protein                                         | 100 | 88  |
| BPSS1126 | putative O-methyltransferase                                                     | 100 | 97  |
| BPSS1127 | putative glyoxylase/bleomycin resistance protein/dioxygenase superfamily protein | 100 | 93  |
| BPSS1128 | major facilitator superfamily transporter homolog                                | 100 | 97  |
| BPSS1129 | putative membrane protein                                                        | 100 | 95  |
| BPSS1130 | hypothetical protein                                                             | 100 | 93  |
| BPSS1131 | putative LuxR family transcriptional regulator                                   | 100 | 97  |
| BPSS1132 | putative membrane protein                                                        | 100 | 96  |
| BPSS1133 | putative 2,4-dienoyl-CoA reductase                                               | 100 | 93  |
| BPSS1134 | PadR-like family regulatory protein                                              | 100 | 95  |
| BPSS1138 | conserved hypothetical protein                                                   | 97  | 92  |
| BPSS1139 | conserved hypothetical protein                                                   | 100 | 97  |
| BPSS1140 | putative universal stress family protein                                         | 100 | 89  |
| BPSS1142 | putative hydrogenase/oxidoreductase subunit                                      | 98  | 95  |
| BPSS1144 | putative hydrogenase/NADPH dehydrogenase subunit                                 | 100 | 96  |
| BPSS1145 | putative membrane protein                                                        | 100 | 98  |
| BPSS1146 | formate hydrogenlyase subunit 4                                                  | 100 | 97  |
| BPSS1147 | putative hydrogenase subunit                                                     | 100 | 95  |
| BPSS1148 | putative membrane protein                                                        | 100 | 95  |
| BPSS1149 | hypothetical protein                                                             | 100 | 92  |

|          |                                                                                               |     |    |
|----------|-----------------------------------------------------------------------------------------------|-----|----|
| BPSS1150 | putative phosphocarrier protein                                                               | 100 | 93 |
| BPSS1151 | putative spermidine synthase protein                                                          | 99  | 91 |
| BPSS1152 | putative DNA-binding protein                                                                  | 100 | 98 |
| BPSS1154 | putative nitrate/nitrite transporter                                                          | 100 | 93 |
| BPSS1155 | putative rotamase/peptidyl-prolyl cis-trans isomerase family protein                          | 100 | 87 |
| BPSS1156 | putative respiratory nitrate reductase subunit                                                | 100 | 91 |
| BPSS1157 | putative respiratory nitrate reductase subunit                                                | 100 | 90 |
| BPSS1158 | putative respiratory nitrate reductase subunit                                                | 100 | 96 |
| BPSS1159 | putative respiratory nitrate reductase subunit                                                | 100 | 94 |
| BPSS1160 | putative two component sensor regulator                                                       | 100 | 90 |
| BPSS1161 | putative LuxR family transcriptional regulator                                                | 100 | 96 |
| BPSS1162 | putative response regulator receiver domain protein                                           | 100 | 92 |
| BPSS1163 | putative fumarate and nitrate reduction family regulatory protein                             | 100 | 93 |
| BPSS1164 | conserved hypothetical protein                                                                | 100 | 94 |
| BPSS1165 | putative alpha-ketoglutarate-dependent taurine dioxygenase                                    | 100 | 94 |
| BPSS1167 | putative thioesterase                                                                         | 100 | 96 |
| BPSS1168 | putative acetyltransferase protein                                                            | 100 | 90 |
| BPSS1169 | conserved hypothetical protein                                                                | 100 | 94 |
| BPSS1171 | putative non-ribosomal peptide synthase/polyketide synthase                                   | 100 | 87 |
| BPSS1172 | putative non-ribosomal peptide synthase/polyketide synthase                                   | 100 | 91 |
| BPSS1173 | putative non-ribosomal peptide/polyketide synthase protein                                    | 100 | 86 |
| BPSS1175 | putative oligopeptidase A                                                                     | 99  | 86 |
| BPSS1176 | putative autoinducer-binding transcriptional activator protein                                | 100 | 95 |
| BPSS1178 | putative transmembrane antiporter Na <sup>+</sup> or K <sup>+</sup> /H <sup>+</sup> exchanger | 100 | 92 |
| BPSS1180 | putative N-acyl homoserine lactone synthase                                                   | 100 | 91 |
| BPSS1181 | putative surfactin/non-ribosomally encoded peptide/polyketide synthase                        | 100 | 90 |
| BPSS1182 | putative acyl carrier protein                                                                 | 100 | 91 |
| BPSS1183 | putative non-ribosomally encoded peptide/polyketide synthase                                  | 100 | 97 |
| BPSS1184 | hypothetical protein                                                                          | 100 | 87 |
| BPSS1190 | conserved hypothetical protein                                                                | 100 | 92 |
| BPSS1191 | putative 1-aminocyclopropane-1-carboxylate deaminase                                          | 100 | 89 |
| BPSS1192 | hypothetical protein                                                                          | 100 | 87 |
| BPSS1193 | putative non-ribosomal peptide/polyketide synthase                                            | 100 | 88 |
| BPSS1196 | SyrP-like regulatory protein                                                                  | 100 | 92 |
| BPSS1198 | putative exported protein                                                                     | 100 | 95 |
| BPSS1199 | hypothetical protein                                                                          | 100 | 96 |
| BPSS1200 | putative GntR family transcriptional regulatory protein                                       | 99  | 88 |
| BPSS1201 | conserved hypothetical protein                                                                | 97  | 95 |
| BPSS1203 | aspartate carbonyltransferase                                                                 | 100 | 97 |
| BPSS1204 | putative iron transport receptor protein                                                      | 100 | 95 |
| BPSS1205 | conserved hypothetical protein                                                                | 99  | 94 |
| BPSS1206 | putative iron-regulated protein                                                               | 100 | 96 |
| BPSS1207 | transposase (partial)                                                                         | 100 | 97 |
| BPSS1210 | conserved hypothetical protein                                                                | 99  | 95 |
| BPSS1211 | putative membrane protein                                                                     | 100 | 93 |
| BPSS1212 | conserved hypothetical protein                                                                | 100 | 92 |
| BPSS1213 | conserved hypothetical protein                                                                | 100 | 93 |
| BPSS1217 | putative exported protein                                                                     | 100 | 93 |
| BPSS1218 | putative methyl-accepting chemotaxis protein                                                  | 100 | 95 |



|          |                                                                   |     |    |
|----------|-------------------------------------------------------------------|-----|----|
| BPSS1247 | putative nitrate transporter component                            | 100 | 89 |
| BPSS1253 | putative LysR family transcriptional regulator                    | 100 | 98 |
| BPSS1279 | putative threonine dehydratase                                    | 100 | 91 |
| BPSS1280 | hypothetical protein                                              | 100 | 89 |
| BPSS1281 | conserved hypothetical protein                                    | 100 | 96 |
| BPSS1282 | putative lipoprotein                                              | 100 | 86 |
| BPSS1363 | putative exported protein                                         | 100 | 86 |
| BPSS1366 | putative sarcosine oxidase gamma subunit                          | 100 | 92 |
| BPSS1367 | putative sarcosine oxidase alpha subunit                          | 100 | 97 |
| BPSS1368 | putative sarcosine oxidase delta subunit                          | 100 | 92 |
| BPSS1369 | putative sarcosine oxidase beta subunit                           | 100 | 99 |
| BPSS1370 | putative L-serine dehydratase                                     | 100 | 97 |
| BPSS1373 | conserved hypothetical protein                                    | 99  | 92 |
| BPSS1437 | putative lipoprotein                                              | 99  | 88 |
| BPSS1438 | hypothetical protein                                              | 100 | 90 |
| BPSS1467 | putative aminotransferase protein                                 | 99  | 95 |
| BPSS1472 | putative transposase                                              | 100 | 93 |
| BPSS1574 | periplasmic component of taurine ABC transporter                  | 100 | 92 |
| BPSS1575 | alpha-ketoglutarate-dependent taurine dioxygenase                 | 100 | 90 |
| BPSS1614 | putative type III secretion protein                               | 99  | 91 |
| BPSS1619 | putative type III secretion protein                               | 100 | 89 |
| BPSS1624 | putative type III secretion protein                               | 100 | 87 |
| BPSS1683 | putative lipopolysaccharide biosynthesis-related membrane protein | 99  | 90 |
| BPSS1686 | putative exported protein                                         | 100 | 94 |
| BPSS1689 | putative UDP-glucose 4-epimerase                                  | 100 | 91 |
| BPSS1713 | conserved hypothetical protein                                    | 99  | 92 |
| BPSS1731 | putative pigment biosynthesis-related tyrosinase protein          | 100 | 93 |
| BPSS1733 | putative membrane protein                                         | 100 | 93 |
| BPSS1734 | putative peptide hydrolase                                        | 100 | 94 |
| BPSS1735 | putative ABC transport system, membrane protein                   | 100 | 97 |
| BPSS1741 | Lipase precursor                                                  | 100 | 93 |
| BPSS1754 | putative membrane protein                                         | 100 | 88 |
| BPSS1798 | conserved hypothetical protein                                    | 100 | 88 |
| BPSS1804 | hypothetical protein                                              | 100 | 88 |
| BPSS1805 | putative membrane protein                                         | 100 | 97 |
| BPSS1806 | conserved hypothetical protein                                    | 100 | 88 |
| BPSS1807 | 4-hydroxy-2-oxovalerate aldolase                                  | 100 | 96 |
| BPSS1808 | acetaldehyde dehydrogenase                                        | 100 | 93 |
| BPSS1809 | putative thioesterase                                             | 100 | 93 |
| BPSS1810 | branched-chain amino acid aminotransferase                        | 100 | 97 |
| BPSS1811 | putative transferase                                              | 100 | 96 |
| BPSS1812 | putative non-ribosomal peptide synthesis thioesterase             | 100 | 95 |
| BPSS1813 | putative non-ribosomal peptide synthase related protein           | 100 | 98 |
| BPSS1814 | putative phosphopantetheine attachment protein                    | 100 | 97 |
| BPSS1815 | putative non-ribosomal peptide synthase                           | 100 | 94 |
| BPSS1816 | putative regulatory protein                                       | 100 | 89 |
| BPSS1817 | hypothetical protein                                              | 100 | 87 |
| BPSS1818 | putative membrane protein                                         | 100 | 97 |
| BPSS1819 | putative serine/threonine protein phosphatase                     | 100 | 94 |

|          |                                                                                                  |     |    |
|----------|--------------------------------------------------------------------------------------------------|-----|----|
| BPSS1820 | conserved hypothetical protein                                                                   | 99  | 96 |
| BPSS1821 | conserved hypothetical protein                                                                   | 100 | 96 |
| BPSS1822 | putative membrane protein                                                                        | 100 | 95 |
| BPSS1823 | peptidyl-prolyl cis-trans isomerase                                                              | 100 | 98 |
| BPSS1825 | putative glycosyltransferase                                                                     | 100 | 96 |
| BPSS1826 | putative glycosyltransferase                                                                     | 100 | 92 |
| BPSS1827 | putative membrane protein                                                                        | 100 | 96 |
| BPSS1828 | putative glycosyltransferase group 1 protein                                                     | 100 | 92 |
| BPSS1829 | putative glycosyltransferase                                                                     | 100 | 93 |
| BPSS1830 | putative exopolysaccharide biosynthesis related tyrosine-protein kinase                          | 100 | 96 |
| BPSS1831 | putative exopolysaccharide (EPS) biosynthesis related polysaccharide lipoprotein                 | 100 | 97 |
| BPSS1832 | putative exopolysaccharide (EPS) biosynthesis related low molecular weight protein-tyrosine-phos | 100 | 93 |
| BPSS1833 | UDP-glucose 6-dehydrogenase 2                                                                    | 100 | 94 |
| BPSS1834 | putative lipopolysaccharide biosynthesis related protein                                         | 100 | 95 |
| BPSS1881 | putative membrane protein                                                                        | 100 | 95 |
| BPSS1937 | putative ABC transport system, exported protein                                                  | 100 | 96 |
| BPSS1974 | putative lipoprotein                                                                             | 100 | 91 |
| BPSS1979 | hypothetical protein                                                                             | 100 | 88 |
| BPSS1981 | conserved hypothetical protein                                                                   | 100 | 92 |
| BPSS1982 | putative cation efflux related membrane protein                                                  | 100 | 89 |
| BPSS1983 | putative deoxyribonuclease                                                                       | 100 | 90 |
| BPSS1984 | hypothetical protein                                                                             | 100 | 91 |
| BPSS1985 | hypothetical protein                                                                             | 100 | 89 |
| BPSS1986 | hypothetical protein                                                                             | 100 | 92 |
| BPSS1987 | putative phosphatase                                                                             | 100 | 90 |
| BPSS1988 | hypothetical protein                                                                             | 99  | 89 |
| BPSS1989 | conserved hypothetical protein                                                                   | 100 | 91 |
| BPSS1990 | putative aldolase                                                                                | 100 | 93 |
| BPSS1991 | conserved hypothetical protein                                                                   | 100 | 88 |
| BPSS1992 | putative exported peptidase                                                                      | 100 | 95 |
| BPSS1993 | serine metalloprotease precursor                                                                 | 100 | 89 |
| BPSS1994 | metal-related two-component system, response regulator                                           | 100 | 97 |
| BPSS1995 | metal-related two-component system, histidine kinase                                             | 100 | 94 |
| BPSS1996 | putative exported protein                                                                        | 100 | 92 |
| BPSS1997 | beta-lactamase precursor                                                                         | 100 | 92 |
| BPSS2003 | putative conserved periplasmic protein                                                           | 100 | 91 |
| BPSS2009 | glucosamine--fructose-6-phosphate aminotransferase [isomerizing]                                 | 100 | 95 |
| BPSS2010 | hypothetical protein                                                                             | 98  | 90 |
| BPSS2011 | putative outer membrane protein                                                                  | 100 | 86 |
| BPSS2012 | putative membrane protein                                                                        | 100 | 88 |
| BPSS2014 | hypothetical protein                                                                             | 100 | 91 |
| BPSS2015 | putative inner membrane glycosyltransferase                                                      | 100 | 91 |
| BPSS2016 | UDP-N-acetylglucosamine 2-epimerase                                                              | 100 | 93 |
| BPSS2017 | putative LysR-family transcriptional regulator                                                   | 99  | 97 |
| BPSS2018 | putative membrane protein                                                                        | 100 | 93 |
| BPSS2021 | putative decarboxylase                                                                           | 98  | 89 |
| BPSS2022 | putative outer membrane protein                                                                  | 100 | 89 |
| BPSS2026 | putative carbohydrate kinase                                                                     | 99  | 90 |
| BPSS2028 | putative TetR-family transcriptional regulator                                                   | 100 | 91 |

|          |                                                                       |     |    |
|----------|-----------------------------------------------------------------------|-----|----|
| BPSS2029 | putative acyl-CoA dehydrogenase                                       | 100 | 93 |
| BPSS2030 | putative short-chain dehydrogenase                                    | 98  | 93 |
| BPSS2031 | acetyl-CoA carboxylase carboxyltransferase                            | 100 | 95 |
| BPSS2032 | putative acyl-CoA dehydrogenase                                       | 100 | 97 |
| BPSS2033 | putative enoyl-CoA hydratase/isomerase                                | 99  | 86 |
| BPSS2034 | putative acetyl-/propionyl-coenzyme A carboxylase alpha chain protein | 100 | 89 |
| BPSS2035 | conserved hypothetical protein                                        | 100 | 95 |
| BPSS2036 | putative AMP-binding acetyl-CoA synthetase                            | 100 | 91 |
| BPSS2037 | putative inner membrane fatty acid desaturase                         | 100 | 96 |
| BPSS2038 | putative polyketide synthase subunit                                  | 100 | 90 |
| BPSS2039 | putative cyclopropane-fatty-acyl-phospholipid synthase                | 100 | 97 |
| BPSS2040 | putative inner membrane fatty acid desaturase                         | 100 | 97 |
| BPSS2041 | conserved hypothetical protein                                        | 100 | 97 |
| BPSS2042 | putative inner membrane fatty-acid--CoA ligase                        | 100 | 93 |
| BPSS2043 | conserved hypothetical protein                                        | 100 | 98 |
| BPSS2044 | conserved hypothetical protein                                        | 99  | 95 |
| BPSS2045 | conserved hypothetical protein                                        | 100 | 99 |
| BPSS2078 | conserved hypothetical protein                                        | 100 | 95 |
| BPSS2116 | putative D-serine dehydratase                                         | 99  | 88 |
| BPSS2149 | putative MmgE/Prp family protein                                      | 100 | 94 |
| BPSS2150 | putative citrate lyase                                                | 100 | 95 |
| BPSS2151 | putative Acyl-CoA transferase/carnitine dehydratase protein           | 100 | 93 |
| BPSS2152 | putative zinc-binding dehydrogenase                                   | 100 | 97 |
| BPSS2153 | putative isochorismatase family protein                               | 100 | 96 |
| BPSS2154 | putative MFS family transporter                                       | 100 | 91 |
| BPSS2155 | putative MFS family transporter                                       | 100 | 91 |
| BPSS2156 | conserved hypothetical protein                                        | 100 | 93 |
| BPSS2157 | putative Acyl-CoA transferase/carnitine dehydratase protein           | 100 | 98 |
| BPSS2172 | hypothetical protein                                                  | 100 | 94 |
| BPSS2173 | carbon starvation protein A                                           | 100 | 98 |
| BPSS2174 | putative cytochrome P460                                              | 100 | 87 |
| BPSS2175 | putative hydrolase                                                    | 100 | 91 |
| BPSS2176 | conserved hypothetical protein                                        | 100 | 92 |
| BPSS2177 | putative LysR-family transcriptional regulator                        | 100 | 91 |
| BPSS2180 | putative membrane protein                                             | 100 | 92 |
| BPSS2181 | conserved hypothetical protein                                        | 100 | 95 |
| BPSS2182 | putative glycosyl transferase                                         | 100 | 96 |
| BPSS2183 | putative membrane protein                                             | 100 | 87 |
| BPSS2184 | putative membrane protein                                             | 100 | 91 |
| BPSS2185 | putative pilus subunit protein                                        | 100 | 96 |
| BPSS2186 | putative pilus subunit protein                                        | 100 | 87 |
| BPSS2187 | putative pilus assembly-related outer membrane protein                | 100 | 91 |
| BPSS2188 | conserved hypothetical protein                                        | 100 | 93 |
| BPSS2189 | putative pilus assembly-related, exported protein                     | 100 | 94 |
| BPSS2190 | putative outer membrane protein                                       | 100 | 86 |
| BPSS2191 | putative lipoprotein                                                  | 100 | 94 |
| BPSS2192 | putative membrane protein                                             | 100 | 93 |
| BPSS2193 | putative membrane protein                                             | 100 | 92 |
| BPSS2194 | putative membrane protein                                             | 100 | 92 |

|          |                                                        |     |    |
|----------|--------------------------------------------------------|-----|----|
| BPSS2195 | putative pilus assembly-related protein                | 100 | 93 |
| BPSS2196 | putative type II/IV secretion system-related protein   | 100 | 96 |
| BPSS2197 | putative membrane protein                              | 100 | 93 |
| BPSS2198 | putative membrane protein                              | 100 | 96 |
| BPSS2199 | putative AsnC-family regulatory protein                | 100 | 96 |
| BPSS2200 | aromatic-amino-acid aminotransferase                   | 100 | 92 |
| BPSS2201 | conserved hypothetical protein                         | 98  | 94 |
| BPSS2202 | putative porin related, membrane protein               | 100 | 90 |
| BPSS2203 | putative amino acid transport, membrane protein        | 100 | 95 |
| BPSS2204 | putative GntR-family regulatory protein                | 100 | 98 |
| BPSS2205 | conserved hypothetical protein                         | 100 | 95 |
| BPSS2206 | putative transport related, membrane protein           | 100 | 94 |
| BPSS2207 | putative LysR-family transcriptional regulator         | 100 | 97 |
| BPSS2320 | 4'-phosphopantetheinyl transferase superfamily protein | 100 | 87 |

---

**Segment 7- Bt unique**


---

| <b>Gene</b> | <b>Description</b>                                         |
|-------------|------------------------------------------------------------|
| BTH_I0005   | cobalamin synthesis protein/P47K family protein            |
| BTH_I0029   | flagellar biosynthesis protein                             |
| BTH_I0034   | methyltransferase                                          |
| BTH_I0063   | hypothetical protein                                       |
| BTH_I0065   | hypothetical protein                                       |
| BTH_I0067   | hypothetical protein                                       |
| BTH_I0069   | lipoprotein, putative                                      |
| BTH_I0074   | transposase, putative                                      |
| BTH_I0075   | recombinase                                                |
| BTH_I0076   | stage 0 sporulation protein J, putative                    |
| BTH_I0077   | L0013 protein                                              |
| BTH_I0089   | conserved hypothetical protein                             |
| BTH_I0091   | phage portal protein, PBSX family                          |
| BTH_I0092   | Fels-2 prophage protein                                    |
| BTH_I0093   | conserved hypothetical protein                             |
| BTH_I0094   | Phage integrase                                            |
| BTH_I0095   | hypothetical protein                                       |
| BTH_I0096   | hypothetical protein                                       |
| BTH_I0097   | conserved hypothetical protein                             |
| BTH_I0098   | conserved hypothetical protein                             |
| BTH_I0099   | conserved hypothetical protein                             |
| BTH_I0100   | conserved hypothetical protein                             |
| BTH_I0101   | conserved hypothetical protein                             |
| BTH_I0102   | DEAD/DEAH box helicase:Helicase, C-terminal                |
| BTH_I0103   | conserved hypothetical protein                             |
| BTH_I0104   | conserved hypothetical protein                             |
| BTH_I0105   | hypothetical protein                                       |
| BTH_I0106   | PUTATIVE HEMAGGLUTININ/HEMOLYSIN-RELATED PROTEIN, putative |
| BTH_I0107   | possible transcriptional regulator, XRE family             |
| BTH_I0108   | hypothetical protein                                       |
| BTH_I0109   | conserved hypothetical protein                             |
| BTH_I0110   | gp47 (Bacteriophage A118) homolog lin0084                  |

BTH\_I0111 conserved hypothetical protein  
BTH\_I0112 conserved hypothetical protein  
BTH\_I0113 Protein kinase domain protein  
BTH\_I0114 conserved hypothetical protein  
BTH\_I0115 bacteriophage phiC31 resistance protein pglY  
BTH\_I0116 bacteriophage phiC31 resistance protein pglZ, putative  
BTH\_I0117 gp31  
BTH\_I0118 gp30  
BTH\_I0119 gp29  
BTH\_I0132 sun protein  
BTH\_I0167 hypothetical protein  
BTH\_I0175 hypothetical protein  
BTH\_I0177 conserved hypothetical protein  
BTH\_I0184 transcriptional regulator, LysR family  
BTH\_I0185 dihydrodipicolinate synthetase family protein  
BTH\_I0186 aldehyde dehydrogenase family protein  
BTH\_I0187 MFS transporter, phthalate permease family  
BTH\_I0188 conserved domain protein  
BTH\_I0189 glucarate dehydratase  
BTH\_I0190 D-galactarate dehydratase  
BTH\_I0191 conserved hypothetical protein  
BTH\_I0195 Flagellar hook-length control protein, putative  
BTH\_I0204 hypothetical protein  
BTH\_I0207 lipoprotein, putative  
BTH\_I0214 conserved hypothetical protein  
BTH\_I0215 hypothetical protein  
BTH\_I0239 FigA family family  
BTH\_I0256 conserved hypothetical protein  
BTH\_I0259 glyoxalase family protein  
BTH\_I0265 transposase, putative  
BTH\_I0266 Transposase (IS4 family)  
BTH\_I0268 hypothetical protein  
BTH\_I0269 manganese/iron transporter, NRAMP family  
BTH\_I0270 lipoprotein, putative  
BTH\_I0273 conserved hypothetical protein  
BTH\_I0274 DNA-binding response regulator  
BTH\_I0275 sensor histidine kinase  
BTH\_I0276 transcriptional regulator, LysR family  
BTH\_I0277 conserved hypothetical protein  
BTH\_I0278 hypothetical protein  
BTH\_I0280 conserved hypothetical protein  
BTH\_I0282 heavy-metal-associated domain protein-related protein  
BTH\_I0287 streptavidin, putative  
BTH\_I0293 hypothetical protein  
BTH\_I0296 hypothetical protein  
BTH\_I0303 related to SH3-domain protein Cyk3  
BTH\_I0304 hypothetical protein  
BTH\_I0311 Protein of unknown function (DUF1289) family  
BTH\_I0318 hypothetical protein

BTH\_I0322 lactonase  
BTH\_I0324 sensor histidine kinase  
BTH\_I0327 PUTATIVE ATP-SENSITIVE INWARD RECTIFIER POTASSIUM CHANNEL RELATED TRANSMEMBRANE PROTEIN  
BTH\_I0334 conserved hypothetical protein  
BTH\_I0336 cutC family protein  
BTH\_I0351 oxidoreductase, short-chain dehydrogenase/reductase family  
BTH\_I0360 hypothetical protein  
BTH\_I0361 transcriptional regulator, lclR family  
BTH\_I0368 hypothetical protein  
BTH\_I0371 conserved hypothetical protein  
BTH\_I0384 conserved hypothetical protein  
BTH\_I0387 quinone oxidoreductase  
BTH\_I0388 transcriptional regulator, LysR family  
BTH\_I0390 hypothetical protein  
BTH\_I0391 conserved hypothetical protein  
BTH\_I0403 conserved hypothetical protein  
BTH\_I0414 HesA/MoeB/ThiF family protein  
BTH\_I0455 conserved hypothetical protein  
BTH\_I0467 hypothetical protein  
BTH\_I0499 major facilitator family transporter  
BTH\_I0505 transposase  
BTH\_I0506 carboxymuconolactone decarboxylase family protein  
BTH\_I0515 conserved hypothetical protein  
BTH\_I0516 conserved hypothetical protein  
BTH\_I0525 PAP2 family protein  
BTH\_I0527 conserved hypothetical protein  
BTH\_I0534 conserved hypothetical protein  
BTH\_I0557 thiopurine S-methyltransferase family protein  
BTH\_I0568 hypothetical protein  
BTH\_I0571 thioesterase domain protein  
BTH\_I0579 integral membrane protein  
BTH\_I0589 conserved hypothetical protein TIGR00043, putative  
BTH\_I0597 hypothetical protein  
BTH\_I0611 DgoA protein  
BTH\_I0612 Protein of unknown function (DUF636) family  
BTH\_I0616 hypothetical protein  
BTH\_I0619 cholesterol oxidase  
BTH\_I0623 Erythromycin esterase family  
BTH\_I0628 Bacterial protein of unknown function (DUF879) superfamily  
BTH\_I0629 hypothetical protein  
BTH\_I0630 hypothetical protein  
BTH\_I0636 conserved hypothetical protein  
BTH\_I0637 conserved hypothetical protein  
BTH\_I0638 Phage integrase family domain protein  
BTH\_I0642 DNA-binding response regulator  
BTH\_I0644 regulatory protein RecX, putative  
BTH\_I0649 Pilin (bacterial filament) subfamily  
BTH\_I0689 cation ABC transporter, ATP-binding protein, putative  
BTH\_I0691 transcriptional regulator, putative

BTH\_I0694 PUTATIVE TAGATOSE 6-PHOSPHATE KINASE PROTEIN  
BTH\_I0711 cyclase, putative  
BTH\_I0714 peptide methionine sulfoxide reductase  
BTH\_I0715 Protein of unknown function family  
BTH\_I0731 UDP-N-acetylenolpyruvoylglucosamine reductase  
BTH\_I0753 citrate synthase family protein  
BTH\_I0765 conserved hypothetical protein  
BTH\_I0784 FscRII, putative  
BTH\_I0797 hypothetical protein  
BTH\_I0798 hypothetical protein  
BTH\_I0805 DNA-binding protein  
BTH\_I0806 hypothetical protein  
BTH\_I0807 PROBABLE INTEGRASE PROTEIN  
BTH\_I0808 transcriptional regulator  
BTH\_I0809 conserved hypothetical protein  
BTH\_I0810 TrapT dctQ-M fusion permease, dicarboxylate transport  
BTH\_I0811 TrapT family, dctP subunit, C4-dicarboxylate periplasmic binding protein  
BTH\_I0812 ribose operon repressor, putative  
BTH\_I0825 conserved hypothetical protein  
BTH\_I0839 phosphoglycerate mutase family, putative  
BTH\_I0853 hypothetical protein  
BTH\_I0868 lipoprotein, putative  
BTH\_I0879 endo/excinuclease domain protein  
BTH\_I0880 drug resistance transporter, EmrB/QacA family  
BTH\_I0885 transcriptional regulator, LysR family, putative  
BTH\_I0886 acetyltransferase, GNAT family  
BTH\_I0890 amino acid ABC transporter, periplasmic amino acid-binding protein  
BTH\_I0902 conserved hypothetical protein  
BTH\_I0906 lipoprotein, putative  
BTH\_I0909 conserved hypothetical protein  
BTH\_I0910 hypothetical protein  
BTH\_I0911 hypothetical protein  
BTH\_I0912 probable transposase protein  
BTH\_I0913 phage related protein  
BTH\_I0914 hypothetical protein  
BTH\_I0915 hypothetical protein  
BTH\_I0917 gp11  
BTH\_I0918 gp12, putative  
BTH\_I0919 conserved hypothetical protein  
BTH\_I0920 hypothetical protein  
BTH\_I0921 Transposase (IS4 family)  
BTH\_I0922 transposase, putative  
BTH\_I0923 hypothetical protein  
BTH\_I0924 gp22  
BTH\_I0925 lysozyme, putative  
BTH\_I0926 transposase, Mutator family  
BTH\_I0927 gp23  
BTH\_I0928 site-specific recombinase, phage integrase family, truncation  
BTH\_I0930 hypothetical protein

BTH\_I0931 conserved hypothetical protein  
BTH\_I0932 cell wall surface anchor family protein , putative  
BTH\_I0933 Peptidase C39 family family  
BTH\_I0934 hypothetical protein  
BTH\_I0935 conserved hypothetical protein  
BTH\_I0936 sigma-54 dependent DNA-binding transcriptional regulator  
BTH\_I0937 rubredoxin-related protein  
BTH\_I0945 N-carbamyl-L-amino acid amidohydrolase  
BTH\_I0953 conserved hypothetical protein  
BTH\_I0958 conserved hypothetical protein  
BTH\_I0969 membrane protein, putative  
BTH\_I0976 cell division protein FtsK  
BTH\_I0978 hypothetical protein  
BTH\_I0981 ATP-dependent RNA helicase RhIE  
BTH\_I0989 glycosyl transferase, group 1 family protein  
BTH\_I0990 lipopolysaccharide core biosynthesis heptosyltransferase  
BTH\_I0992 conserved hypothetical protein  
BTH\_I0996 carboxymuconolactone decarboxylase family protein  
BTH\_I0997 RNA polymerase sigma-70 factor, ECF family  
BTH\_I0998 transcriptional regulator, LysR family  
BTH\_I0999 transcriptional regulator, LysR family  
BTH\_I1000 MFS permease  
BTH\_I1001 hypothetical protein  
BTH\_I1002 conserved hypothetical protein  
BTH\_I1003 conserved hypothetical protein  
BTH\_I1004 conserved hypothetical protein  
BTH\_I1005 phospholipase C accessory protein, putative  
BTH\_I1017 oxidoreductase, short chain dehydrogenase/reductase family family  
BTH\_I1026 Domain of unknown function (DUF333) family  
BTH\_I1033 major facilitator family transporter  
BTH\_I1082 lipoprotein, putative  
BTH\_I1086 enoyl-CoA hydratase/isomerase family protein  
BTH\_I1087 glutathione S-transferase N-terminal domain protein  
BTH\_I1089 conserved hypothetical protein  
BTH\_I1101 L0013 protein  
BTH\_I1102 TnpB protein  
BTH\_I1103 transposase, Mutator family  
BTH\_I1104 TnpC protein  
BTH\_I1126 conserved hypothetical protein  
BTH\_I1156 hypothetical protein  
BTH\_I1160 MJ0042 family finger-like domain protein  
BTH\_I1167 hypothetical protein  
BTH\_I1185 hypothetical protein  
BTH\_I1199 carbonic anhydrases  
BTH\_I1200 transcriptional regulator, LysR family  
BTH\_I1201 hypothetical protein  
BTH\_I1231 conserved hypothetical protein  
BTH\_I1241 hypothetical protein  
BTH\_I1244 hypothetical protein



BTH\_I1245 lipoprotein, putative  
BTH\_I1249 crossover junction endodeoxyribonuclease RuvC  
BTH\_I1254 Xaa-Pro aminopeptidase  
BTH\_I1258 NUDIX domain protein  
BTH\_I1264 hypothetical protein  
BTH\_I1267 Protein of unknown function (DUF330) family  
BTH\_I1274 major facilitator family transporter  
BTH\_I1283 hypothetical protein  
BTH\_I1285 transcriptional regulator, putative  
BTH\_I1307 conserved hypothetical protein  
BTH\_I1323 YafJ  
BTH\_I1324 mannose-1-phosphate guanylyltransferase/mannose-6-phosphate isomerase  
BTH\_I1325 WcbA  
BTH\_I1326 glycosyltransferase, putative  
BTH\_I1327 WcbC  
BTH\_I1328 methyltransferase, FkbM family domain protein  
BTH\_I1329 glycosyltransferase, putative  
BTH\_I1330 possible glycosyltransferase WbpX, putative  
BTH\_I1331 GDP-mannose 4,6-dehydratase  
BTH\_I1332 GDP-6-deoxy-D-lyxo-4-hexulose reductase, putative  
BTH\_I1333 glycosyl transferase, group 1 family protein, putative  
BTH\_I1334 glycosyltransferase, putative  
BTH\_I1335 BexA  
BTH\_I1336 ctrC protein  
BTH\_I1337 WcbD  
BTH\_I1338 WcbO  
BTH\_I1339 oxidoreductase, short-chain dehydrogenase/reductase family  
BTH\_I1340 putative capsular polysaccharide biosynthesis protein WcbQ  
BTH\_I1341 FATTY ACID SYNTHASE TRANSMEMBRANE PROTEIN  
BTH\_I1342 lpxc  
BTH\_I1345 gp48, putative  
BTH\_I1346 hypothetical protein  
BTH\_I1348 membrane protein, putative  
BTH\_I1364 flagellar transcriptional activator FlhD  
BTH\_I1365 fatty acid desaturase family protein, putative  
BTH\_I1366 Proline dehydrogenase superfamily, putative  
BTH\_I1367 aminotransferase, class V superfamily, putative  
BTH\_I1368 membrane protein, putative  
BTH\_I1369 hypothetical protein  
BTH\_I1381 conserved hypothetical protein  
BTH\_I1382 conserved hypothetical protein  
BTH\_I1383 hypothetical protein  
BTH\_I1384 hypothetical protein  
BTH\_I1389 conserved hypothetical protein  
BTH\_I1393 EAL domain protein  
BTH\_I1401 nitroreductase family protein  
BTH\_I1408 xanthine dehydrogenase, N-terminal subunit  
BTH\_I1418 conserved hypothetical protein  
BTH\_I1419 transport-associated domain protein

BTH\_I1423 hypothetical protein  
BTH\_I1435 conserved hypothetical protein  
BTH\_I1438 hypothetical protein  
BTH\_I1439 TnpC protein  
BTH\_I1441 L0013 protein  
BTH\_I1442 conserved hypothetical protein  
BTH\_I1443 Superfamily I DNA and RNA helicases  
BTH\_I1444 hydrolase of HAD-superfamily  
BTH\_I1445 L0013 protein  
BTH\_I1447 TnpC protein  
BTH\_I1449 TnpC protein  
BTH\_I1450 TnpC protein  
BTH\_I1452 L0013 protein  
BTH\_I1453 transposase  
BTH\_I1454 transposase  
BTH\_I1455 hypothetical protein  
BTH\_I1456 hypothetical protein  
BTH\_I1480 glycosyl transferase, group 2 family protein, putative  
BTH\_I1481 epimerase/dehydratase  
BTH\_I1505 omega-amino acid--pyruvate aminotransferase  
BTH\_I1515 hypothetical protein  
BTH\_I1516 quinone oxidoreductase  
BTH\_I1517 transcriptional regulator, LysR family  
BTH\_I1523 conserved hypothetical protein  
BTH\_I1532 conserved hypothetical protein  
BTH\_I1533 probable helicase Z1568  
BTH\_I1534 conserved domain protein  
BTH\_I1536 transposase  
BTH\_I1537 transposase  
BTH\_I1539 helicase, putative  
BTH\_I1540 Doc protein  
BTH\_I1545 BKRF1 encodes EBNA-1 protein-like  
BTH\_I1557 hypothetical protein  
BTH\_I1575 conserved hypothetical protein  
BTH\_I1576 metabolite:proton symporter family protein  
BTH\_I1578 Protein of unknown function (DUF636) family  
BTH\_I1579 conserved hypothetical protein  
BTH\_I1580 conserved hypothetical protein  
BTH\_I1593 hypothetical protein  
BTH\_I1594 cold-shock domain family protein-related protein  
BTH\_I1600 conserved hypothetical protein  
BTH\_I1601 Transglycosylase associated protein family  
BTH\_I1603 hypothetical protein  
BTH\_I1607 hypothetical protein  
BTH\_I1616 hypothetical protein  
BTH\_I1640 conserved hypothetical protein  
BTH\_I1647 murein transglycosylase domain protein  
BTH\_I1659 membrane protein, putative  
BTH\_I1665 pyrophosphatase, MutT/nudix family

BTH\_I1674 dihydrofolate reductase  
BTH\_I1675 sigma-54 dependent DNA-binding transcriptional regulator  
BTH\_I1676 hypothetical protein  
BTH\_I1677 hypothetical protein  
BTH\_I1678 conserved hypothetical protein  
BTH\_I1682 transcriptional regulator, ArsR family  
BTH\_I1683 conserved hypothetical protein  
BTH\_I1690 membrane protein, putative  
BTH\_I1691 AzlC family protein  
BTH\_I1692 transcriptional regulator, AraC family, putative  
BTH\_I1713 Maf-like protein  
BTH\_I1730 ribonuclease III, putative  
BTH\_I1744 transposase, Mutator family  
BTH\_I1762 phospholipase C  
BTH\_I1764 hydrolase, alpha/beta fold family  
BTH\_I1765 luciferase-like monooxygenase  
BTH\_I1766 syl transferase, group 2 family protein  
BTH\_I1781 glutathione S-transferase, putative  
BTH\_I1782 transcriptional regulator, LysR family, putative  
BTH\_I1787 ubiquinol oxidase, subunit I  
BTH\_I1795 sufD domain protein  
BTH\_I1797 ABC transporter  
BTH\_I1802 membrane protein, putative  
BTH\_I1818 conserved hypothetical protein  
BTH\_I1819 phosphopantetheinyltransferase family protein  
BTH\_I1823 Bacterial protein of unknown function (DUF886) superfamily  
BTH\_I1830 conserved hypothetical protein  
BTH\_I1834 CoA transferase, CAIB/BAIF family  
BTH\_I1848 methyltransferase, FkbM family domain protein  
BTH\_I1858 acyltransferase family protein  
BTH\_I1859 DNA polymerase IV  
BTH\_I1871 iron-sulfur cluster binding protein  
BTH\_I1884 peptide chain release factor 2, programmed  
BTH\_I1914 integrative genetic element Gsu32, integrase, putative  
BTH\_I1915 Prophage CP4-57 regulatory protein (AlpA) family  
BTH\_I1916 hypothetical protein  
BTH\_I1917 hypothetical protein  
BTH\_I1918 pyocin R2\_PP, tail formation  
BTH\_I1919 hypothetical protein  
BTH\_I1920 gp24  
BTH\_I1921 gp26  
BTH\_I1922 gp25a  
BTH\_I1923 gp26  
BTH\_I1924 conserved hypothetical protein  
BTH\_I1925 hypothetical protein  
BTH\_I1929 gp33  
BTH\_I1930 transposase  
BTH\_I1931 transposase  
BTH\_I1932 hypothetical protein

BTH\_I1933 conserved hypothetical protein  
BTH\_I1952 adenylylsulfate kinase  
BTH\_I1969 kinase, putative  
BTH\_I2003 phage SPO1 DNA polymerase domain protein  
BTH\_I2009 conserved hypothetical protein  
BTH\_I2021 hypothetical protein  
BTH\_I2024 pseudouridine synthase family protein  
BTH\_I2054 conserved hypothetical protein  
BTH\_I2057 conserved hypothetical protein  
BTH\_I2059 transporter, putative  
BTH\_I2060 conserved hypothetical protein  
BTH\_I2068 conserved hypothetical protein  
BTH\_I2074 transcriptional regulator, LysR family  
BTH\_I2075 Protein of unknown function (DUF1458) family  
BTH\_I2083 hypothetical protein  
BTH\_I2084 conserved hypothetical protein  
BTH\_I2087 DpgD protein  
BTH\_I2100 unnamed protein product; Highly similar to unknown protein of Photorhabdus and some similarities with unknown protein, putative  
BTH\_I2101 hypothetical protein  
BTH\_I2105 hypothetical protein  
BTH\_I2106 hypothetical protein  
BTH\_I2107 conserved hypothetical protein  
BTH\_I2108 hypothetical protein  
BTH\_I2110 hypothetical protein  
BTH\_I2113 porin, interruption-N  
BTH\_I2117 glycerate kinase 1  
BTH\_I2119 hypothetical protein  
BTH\_I2124 sigma 54 modulation protein, putative  
BTH\_I2126 hypothetical protein  
BTH\_I2127 4-carboxymuconolactone decarboxylase domain protein  
BTH\_I2146 conserved hypothetical protein  
BTH\_I2150 acetyltransferase, GNAT family  
BTH\_I2169 hypothetical protein  
BTH\_I2170 hypothetical protein  
BTH\_I2177 RNA polymerase sigma-70 factor, ECF subfamily  
BTH\_I2178 conserved hypothetical protein  
BTH\_I2186 lipoprotein, NLP/P60 family  
BTH\_I2200 molybdopterin biosynthesis moeA protein  
BTH\_I2204 Rrf2 family protein  
BTH\_I2210 lipoic acid synthetase  
BTH\_I2213 ribosomal protein L31  
BTH\_I2219 DNA polymerase III, subunits gamma and tau, programmed  
BTH\_I2258 polyhydroxyalkanoate synthesis repressor PhaR  
BTH\_I2262 hypothetical protein  
BTH\_I2270 outer membrane porin OpcP  
BTH\_I2286 conserved hypothetical protein  
BTH\_I2292 membrane protein, putative  
BTH\_I2294 conserved hypothetical protein  
BTH\_I2295 conserved hypothetical protein

BTH\_I2305 transcriptional regulator, AsnC family  
BTH\_I2313 lipoprotein, putative  
BTH\_I2314 conserved hypothetical protein  
BTH\_I2315 lipoprotein, putative  
BTH\_I2330 conserved hypothetical protein  
BTH\_I2335 alcohol dehydrogenase, iron-containing  
BTH\_I2336 aldose 1-epimerase  
BTH\_I2337 xylose operon regulatory protein  
BTH\_I2338 xylose isomerase  
BTH\_I2339 D-xylose ABC transporter, periplasmic-D xylose binding protein  
BTH\_I2340 sugar ABC transporter, ATP-binding protein  
BTH\_I2341 sugar ABC transporter, permease protein  
BTH\_I2342 periplasmic ribose-binding protein  
BTH\_I2343 ATP binding protein of ABC transporter  
BTH\_I2344 ribose ABC transporter, permease protein VCA0129  
BTH\_I2345 ribose ABC transporter, permease protein  
BTH\_I2346 probable transposase protein  
BTH\_I2347 transposase, Mutator family  
BTH\_I2348 transposase, Mutator family  
BTH\_I2349 transposase, Mutator family  
BTH\_I2350 ISPsy10, transposase, truncation  
BTH\_I2351 conserved hypothetical protein  
BTH\_I2352 Sea27  
BTH\_I2353 Arachidonate 15-lipoxygenase precursor (15-LOX)  
BTH\_I2354 hypothetical protein  
BTH\_I2355 hydrolase, alpha/beta fold family, putative  
BTH\_I2356 serine protease, subtilase family  
BTH\_I2357 thioesterase type II  
BTH\_I2358 lipase/esterase  
BTH\_I2359 pyridine nucleotide-disulphide oxidoreductase, class II, truncation  
BTH\_I2360 nonribosomal peptide synthetase, putative  
BTH\_I2361 phosphotransferase enzyme family protein, putative  
BTH\_I2362 acyl-CoA dehydrogenase domain protein  
BTH\_I2363 polyketide synthase  
BTH\_I2364 peptide synthetase, putative  
BTH\_I2365 polyketide synthase  
BTH\_I2366 polyketide synthase  
BTH\_I2367 dihydroaeruginic acid synthetase  
BTH\_I2368 hypothetical protein  
BTH\_I2369 transcriptional regulator, AraC family domain protein  
BTH\_I2371 transcriptional regulator, AraC family  
BTH\_I2376 long-chain-fatty-acid--CoA ligase, putative  
BTH\_I2378 ABC transporter, periplasmic glycine/betaine-binding protein, putative  
BTH\_I2382 hypothetical protein  
BTH\_I2390 glutathione S-transferase , putative  
BTH\_I2397 precorrin-6Y C5,15-methyltransferase (decarboxylating)  
BTH\_I2402 glycosyl hydrolase, family 18  
BTH\_I2403 hypothetical protein  
BTH\_I2404 carboxylesterase, putative

BTH\_I2410 CbiG  
BTH\_I2412 cobyrinic acid a,c-diamide synthase  
BTH\_I2413 conserved hypothetical protein  
BTH\_I2417 non-ribosomal peptide synthetase, putative  
BTH\_I2418 peptide synthetase homolog  
BTH\_I2428 conserved hypothetical protein  
BTH\_I2429 hypothetical protein  
BTH\_I2437 hypothetical protein  
BTH\_I2438 conserved hypothetical protein  
BTH\_I2447 Peptidase family M23/M37  
BTH\_I2463 ABC transporter permease protein  
BTH\_I2464 permease  
BTH\_I2465 taurine ABC transporter, ATP-binding protein  
BTH\_I2483 conserved hypothetical protein  
BTH\_I2488 hypothetical protein  
BTH\_I2492 Transcriptional regulator family  
BTH\_I2503 hypothetical protein  
BTH\_I2513 amino acid ABC transporter, permease protein  
BTH\_I2523 conserved hypothetical protein  
BTH\_I2531 conserved hypothetical protein  
BTH\_I2536 conserved hypothetical protein  
BTH\_I2568 segregation and condensation protein B  
BTH\_I2571 hypothetical protein  
BTH\_I2573 Uncharacterized ACR, COG1434 family  
BTH\_I2574 hypothetical protein  
BTH\_I2579 conserved hypothetical protein  
BTH\_I2582 Ata11 protein  
BTH\_I2584 transposase  
BTH\_I2585 transposase  
BTH\_I2586 ISBma1, transposase  
BTH\_I2600 hypothetical protein  
BTH\_I2601 putative flavoprotein reductase  
BTH\_I2602 conserved hypothetical protein  
BTH\_I2603 transcriptional regulator, LysR family  
BTH\_I2608 3-oxoadipate CoA-succinyl transferase alpha subunit  
BTH\_I2622 Ser/Thr protein phosphatase family protein  
BTH\_I2623 hypothetical protein  
BTH\_I2652 branched-chain amino acid ABC transporter, permease/ATP binding protein, putative  
BTH\_I2654 thioesterase family protein  
BTH\_I2658 PROBABLE PROTEASE SIGNAL PEPTIDE PROTEIN  
BTH\_I2659 Major Facilitator Superfamily subfamily, putative  
BTH\_I2663 lipoprotein, putative  
BTH\_I2673 trans-aconitate methyltransferase  
BTH\_I2682 hypothetical protein  
BTH\_I2688 TnpC protein  
BTH\_I2690 L0013 protein  
BTH\_I2691 unnamed protein product; Highly similar to unknown protein of Photorhabdus luminescens, putative  
BTH\_I2692 unnamed protein product; Unknown protein, putative  
BTH\_I2694 hypothetical protein

BTH\_I2695 hypothetical protein  
BTH\_I2698 conserved hypothetical protein  
BTH\_I2699 conserved hypothetical protein  
BTH\_I2700 lipoprotein, putative  
BTH\_I2702 lipoprotein, putative  
BTH\_I2707 conserved hypothetical protein  
BTH\_I2709 transposase, IS110 family, interruption  
BTH\_I2710 hypothetical protein  
BTH\_I2712 hypothetical protein  
BTH\_I2714 DNA-binding protein BprA  
BTH\_I2715 major facilitator family transporter  
BTH\_I2716 transcriptional regulator, LysR family, putative  
BTH\_I2717 Phage integrase  
BTH\_I2718 probable acetyltransferase STY4148  
BTH\_I2719 pathogenesis-related protein  
BTH\_I2720 conserved hypothetical protein  
BTH\_I2721 outer membrane hemolysin activator protein  
BTH\_I2722 conserved hypothetical protein  
BTH\_I2723 PROBABLE HEMAGGLUTININ-RELATED PROTEIN  
BTH\_I2724 conserved hypothetical protein  
BTH\_I2725 conserved hypothetical protein  
BTH\_I2726 gp47 (Bacteriophage A118) homolog lin0084  
BTH\_I2727 hypothetical protein  
BTH\_I2728 conserved hypothetical protein  
BTH\_I2729 conserved hypothetical protein  
BTH\_I2730 plasmid related protein  
BTH\_I2731 DNA-binding protein  
BTH\_I2732 conserved hypothetical protein  
BTH\_I2733 Helix-turn-helix domain protein, putative  
BTH\_I2734 lipoprotein, putative  
BTH\_I2735 TnpC protein  
BTH\_I2737 L0013 protein  
BTH\_I2738 conserved hypothetical protein  
BTH\_I2739 putative DNA mismatch repair protein  
BTH\_I2740 type I restriction-modification system endonuclease XF2739  
BTH\_I2741 conserved hypothetical protein  
BTH\_I2742 type I restriction-modification system specificitydeterminant XF2741  
BTH\_I2743 type I restriction system adenine methylase  
BTH\_I2744 transposase  
BTH\_I2745 transposase  
BTH\_I2746 recombinase  
BTH\_I2747 stage 0 sporulation protein J, putative  
BTH\_I2748 transposase, Mutator family  
BTH\_I2751 Aldose 1-epimerase family  
BTH\_I2752 lipoprotein NlpD, putative  
BTH\_I2761 PAP2 family protein  
BTH\_I2762 GH09231p  
BTH\_I2764 hypothetical protein  
BTH\_I2793 proline/betaine transporter

BTH\_I2796 conserved hypothetical protein  
BTH\_I2798 ATP:dephospho-CoA triphosphoribosyl transferase  
BTH\_I2799 hypothetical protein  
BTH\_I2805 malonate transporter, L subunit  
BTH\_I2811 hypothetical protein  
BTH\_I2812 hypothetical protein  
BTH\_I2813 conserved hypothetical protein  
BTH\_I2814 transcriptional regulator, GntR family  
BTH\_I2815 putative membrane protein  
BTH\_I2816 conserved hypothetical protein  
BTH\_I2819 conserved hypothetical protein  
BTH\_I2820 carotenoid 9,10-9,10 cleavage dioxygenase, putative  
BTH\_I2824 GGDEF domain protein  
BTH\_I2825 conserved hypothetical protein  
BTH\_I2826 conserved hypothetical protein  
BTH\_I2827 outer membrane porin OpcP  
BTH\_I2828 transcriptional regulator, LacI family  
BTH\_I2832 hypothetical protein  
BTH\_I2833 ABC transporter, permease protein  
BTH\_I2839 hypothetical protein  
BTH\_I2841 conserved hypothetical protein  
BTH\_I2842 conserved hypothetical protein  
BTH\_I2843 conserved hypothetical protein  
BTH\_I2850 exodeoxyribonuclease V, alpha subunit  
BTH\_I2860 Cysteine dioxygenase type I family  
BTH\_I2879 hypothetical protein  
BTH\_I2881 hypothetical protein  
BTH\_I2882 two-component hybrid sensor and regulator  
BTH\_I2883 aliphatic compound ABC transporter, periplasmic substrate-binding protein  
BTH\_I2884 conserved hypothetical protein  
BTH\_I2889 L0013 protein  
BTH\_I2890 TnpB protein  
BTH\_I2891 hypothetical protein  
BTH\_I2892 transposase, Mutator family  
BTH\_I2893 TnpC protein  
BTH\_I2918 monooxygenase family protein  
BTH\_I2922 Uncharacterised BCR, putative  
BTH\_I2928 conserved hypothetical protein  
BTH\_I2941 conserved hypothetical protein  
BTH\_I2944 conserved hypothetical protein  
BTH\_I2946 hypothetical protein  
BTH\_I2947 fructose-specific IIABC component  
BTH\_I2948 secretion protein, putative  
BTH\_I2951 hypothetical protein  
BTH\_I2953 hypothetical protein  
BTH\_I2966 PUTATIVE TRANSMEMBRANE PROTEIN  
BTH\_I2969 transposase  
BTH\_I2970 ISSo2, transposase OrfB, truncation  
BTH\_I2971 hypothetical protein



BTH\_I2973 stringent starvation protein B  
BTH\_I3010 hypothetical protein  
BTH\_I3025 type II/III secretion system protein  
BTH\_I3026 conserved hypothetical protein  
BTH\_I3088 transposase fragment  
BTH\_I3089 L0013 protein  
BTH\_I3090 TnpB protein  
BTH\_I3100 phenylacetic acid degradation protein PaaD  
BTH\_I3109 transcriptional regulator, AraC family  
BTH\_I3124 lipoprotein, putative  
BTH\_I3126 hypothetical protein  
BTH\_I3128 hypothetical protein  
BTH\_I3130 integrase, putative  
BTH\_I3131 transposase, Mutator family  
BTH\_I3132 site-specific recombinase, phage integrase family  
BTH\_I3133 conserved hypothetical protein  
BTH\_I3134 DNA-binding protein  
BTH\_I3135 resolvase TnpR  
BTH\_I3136 conserved hypothetical protein  
BTH\_I3137 hypothetical protein  
BTH\_I3138 transposase, Mutator family  
BTH\_I3139 helicase domain protein  
BTH\_I3140 TnpC protein  
BTH\_I3142 L0013 protein  
BTH\_I3143 helicase domain protein  
BTH\_I3145 cytochrome c family protein  
BTH\_I3171 phytoene dehydrogenase, putative  
BTH\_I3195 ribosomal protein S21-related protein  
BTH\_I3199 hypothetical protein  
BTH\_I3200 hypothetical protein  
BTH\_I3203 hypothetical protein  
BTH\_I3208 conserved hypothetical protein  
BTH\_I3210 TPR domain protein  
BTH\_I3211 aminotransferase, DegT/DnrJ/EryC1/StrS family  
BTH\_I3212 WbnG  
BTH\_I3213 conserved hypothetical protein  
BTH\_I3214 transferase, putative  
BTH\_I3215 conserved hypothetical protein  
BTH\_I3216 streptogramin acetyl transferase  
BTH\_I3217 hypothetical protein  
BTH\_I3229 transposase, truncation  
BTH\_I3230 hypothetical protein  
BTH\_I3232 site-specific recombinase, phage integrase family  
BTH\_I3233 tRNA modification GTPase TrmE  
BTH\_I3242 conserved hypothetical protein  
BTH\_I3243 conserved hypothetical protein  
BTH\_I3244 transposase, Mutator family  
BTH\_I3245 transcriptional regulator, LysR family  
BTH\_I3246 drug resistance transporter, EmrB/QacA subfamily, putative

BTH\_I3255 glycine cleavage system T protein  
BTH\_I3258 GDSL-like Lipase/Acylhydrolase domain protein  
BTH\_I3259 membrane protein, putative  
BTH\_I3265 hypothetical protein  
BTH\_I3266 hypothetical protein  
BTH\_I3267 hypothetical protein  
BTH\_I3268 32.7 kDa protein (ORF 301)  
BTH\_I3269 probable phage-related secreted protein YPO2280  
BTH\_I3270 hypothetical protein  
BTH\_I3272 Transposase (IS4 family)  
BTH\_I3273 transposase, putative  
BTH\_I3278 site-specific recombinase, phage integrase family  
BTH\_I3279 transposase, Mutator family  
BTH\_I3280 transcriptional regulator, LysR family  
BTH\_I3284 acyltransferase family protein  
BTH\_I3285 hypothetical protein  
BTH\_I3287 hypothetical protein  
BTH\_I3288 hypothetical protein  
BTH\_I3289 unnamed protein product  
BTH\_I3293 probable oxidoreductase  
BTH\_I3296 hypothetical protein  
BTH\_I3325 hypothetical protein  
BTH\_I3326 hypothetical protein  
BTH\_I3341 SET domain protein  
BTH\_II0007 K<sup>+</sup>-transporting ATPase, A subunit  
BTH\_II0008 acetyltransferase, GNAT family family  
BTH\_II0022 hypothetical protein  
BTH\_II0025 hypothetical protein  
BTH\_II0026 cytochrome P450-related protein  
BTH\_II0029 hypothetical protein  
BTH\_II0031 conserved hypothetical protein  
BTH\_II0032 hypothetical protein  
BTH\_II0037 hypothetical protein  
BTH\_II0039 conserved hypothetical protein  
BTH\_II0053 LysE family protein  
BTH\_II0054 thioredoxin, putative  
BTH\_II0055 sulfide:quinone oxidoreductase  
BTH\_II0056 PROBABLE PORIN  
BTH\_II0057 conserved hypothetical protein  
BTH\_II0058 transporter, AcrB/D/F family  
BTH\_II0059 efflux transporter, RND family, MFP subunit, putative  
BTH\_II0060 ArsR family regulatory protein  
BTH\_II0061 Hypothetical protein  
BTH\_II0062 ABC transporter, ATP-binding protein  
BTH\_II0063 permease, putative domain protein  
BTH\_II0064 efflux transporter, RND family, MFP subunit subfamily, putative  
BTH\_II0065 creA protein, putative  
BTH\_II0066 hypothetical protein  
BTH\_II0067 CybP

BTH\_II0068 DNA-binding response regulator  
BTH\_II0069 cation efflux family protein  
BTH\_II0070 PalA  
BTH\_II0071 PROBABLE HEMAGGLUTININ-RELATED PROTEIN  
BTH\_II0072 hemolysin activator protein, HlyB family, putative  
BTH\_II0079 IS407A, transposase OrfA  
BTH\_II0080 transposase subunit  
BTH\_II0081 transposase subunit  
BTH\_II0082 Hypothetical protein  
BTH\_II0083 acetyltransferase, GNAT family  
BTH\_II0084 putrescine ABC transporter, permease protein  
BTH\_II0085 ABC transporter, permease protein  
BTH\_II0086 putrescine ABC transporter, periplasmic putrescine-binding protein, putative  
BTH\_II0087 transposase  
BTH\_II0091 conserved hypothetical protein  
BTH\_II0093 integrase, putative  
BTH\_II0094 conserved hypothetical protein  
BTH\_II0095 transposase  
BTH\_II0096 transposase  
BTH\_II0102 conserved hypothetical protein  
BTH\_II0103 outer membrane porin OpcP  
BTH\_II0104 transcriptional regulator, LysR family  
BTH\_II0105 hypothetical protein  
BTH\_II0106 hypothetical protein  
BTH\_II0107 transcriptional regulator, LysR family  
BTH\_II0108 outer membrane efflux protein  
BTH\_II0109 possible FusE-MFP/HlyD family membrane fusion protein  
BTH\_II0110 fusaric acid resistance protein, putative  
BTH\_II0111 hypothetical protein  
BTH\_II0112 Hep\_Hag family  
BTH\_II0114 YfaZ precursor superfamily  
BTH\_II0115 frimbrial protein  
BTH\_II0119 hypothetical protein  
BTH\_II0121 Protein of unknown function (DUF770) superfamily  
BTH\_II0122 Protein of unknown function (DUF877) superfamily  
BTH\_II0133 Fimbrial protein subfamily, putative  
BTH\_II0139 conserved hypothetical protein  
BTH\_II0143 capsula synthesis response regulator transcription regulator protein  
BTH\_II0144 sensor protein evgS precursor  
BTH\_II0145 glycosyl transferase, group 2 family protein domain protein  
BTH\_II0146 hypothetical protein  
BTH\_II0147 conserved hypothetical protein  
BTH\_II0148 HAD-superfamily hydrolase, subfamily IB (PSPase-like) subfamily, putative  
BTH\_II0149 conserved hypothetical protein  
BTH\_II0150 hypothetical protein  
BTH\_II0151 flagellin D  
BTH\_II0152 putative membrane protein  
BTH\_II0153 chemotaxis MotA protein  
BTH\_II0154 Chemotaxis lafU protein

BTH\_II0155 chemotaxis response regulator  
BTH\_II0156 chemotaxis protein CheA  
BTH\_II0157 chemotaxis protein CheW  
BTH\_II0158 chemotaxis protein  
BTH\_II0159 chemotaxis protein methyltransferase CheR  
BTH\_II0160 chemotaxis protein CheD  
BTH\_II0161 protein-glutamate methylesterase CheB  
BTH\_II0162 protein-glutamate methylesterase CheB  
BTH\_II0163 flagellar biosynthesis protein FlhA  
BTH\_II0164 flagellar biosynthetic protein FlhB  
BTH\_II0165 flagellar biosynthetic protein FliR, putative  
BTH\_II0166 flagellar biosynthetic protein FliQ, putative  
BTH\_II0167 flagellar biosynthetic protein fliP  
BTH\_II0168 flagellar motor switch protein FliN  
BTH\_II0169 conserved hypothetical protein  
BTH\_II0170 Flagellar hook-basal body complex protein FliE  
BTH\_II0171 flagellar M-ring protein FliF  
BTH\_II0172 flagellar motor switch protein FliG, putative  
BTH\_II0173 Flagellar assembly protein FliH  
BTH\_II0174 flagellum-specific ATP synthase FliI  
BTH\_II0175 conserved hypothetical protein  
BTH\_II0176 flagellar hook-associated protein, putative  
BTH\_II0177 flagellar protein FliS  
BTH\_II0178 hypothetical protein  
BTH\_II0179 Flagellar hook-length control protein, putative  
BTH\_II0180 RNA polymerase sigma factor for flagellar operon FliA  
BTH\_II0181 conserved hypothetical protein  
BTH\_II0182 flagellar protein FlgJ  
BTH\_II0183 flagella basal body P-ring formation protein FlgA  
BTH\_II0184 flagellar basal-body rod protein FlgB  
BTH\_II0185 flagellar basal-body rod protein FlgC  
BTH\_II0186 basal-body rod modification protein FlgD, putative  
BTH\_II0187 flagellar hook protein flgE  
BTH\_II0188 flagellar basal-body rod protein FlgF  
BTH\_II0189 flagellar basal-body rod protein FlgG  
BTH\_II0190 flagellar L-ring protein FlgH  
BTH\_II0191 flagellar P-ring protein FlgI  
BTH\_II0192 peptidoglycan hydrolase  
BTH\_II0193 flagellar hook-associated protein 1, putative  
BTH\_II0194 flagellar hook-associated protein 3, putative  
BTH\_II0195 conserved hypothetical protein  
BTH\_II0196 hypothetical protein  
BTH\_II0197 transcriptional regulator, putative  
BTH\_II0208 PROBABLE TRANSMEMBRANE PROTEIN  
BTH\_II0215 outer membrane porin OpcP  
BTH\_II0221 hypothetical protein  
BTH\_II0225 oxidoreductase, short-chain dehydrogenase/reductase family  
BTH\_II0234 class III extradiol-type catecholic dioxygenase, putative  
BTH\_II0235 transcriptional regulator, LysR family

BTH\_II0236 conserved hypothetical protein  
BTH\_II0237 pdhA  
BTH\_II0238 pyruvate dehydrogenase E1 beta subunit  
BTH\_II0239 dihydrolipoamide acyltransferase  
BTH\_II0240 L-lactate dehydrogenase  
BTH\_II0241 major facilitator family transporter  
BTH\_II0242 isochorismatase, isochorismatase family  
BTH\_II0243 transcriptional regulator, LysR family  
BTH\_II0249 FHA domain protein  
BTH\_II0255 conserved hypothetical protein  
BTH\_II0256 serine/threonine protein kinase  
BTH\_II0263 Protein of unknown function (DUF1305) family  
BTH\_II0266 conserved hypothetical protein  
BTH\_II0267 rhsD protein  
BTH\_II0268 ISRSO7-TRANSPOSASE PROTEIN  
BTH\_II0269 ISRSO7-TRANSPOSASE PROTEIN  
BTH\_II0270 transposase fragment  
BTH\_II0271 transposase, Mutator family  
BTH\_II0272 HAD-superfamily hydrolase  
BTH\_II0282 transcriptional regulator, AraC family  
BTH\_II0283 isochorismatase family protein family  
BTH\_II0294 PUTATIVE TRANSCRIPTION REGULATOR PROTEIN, putative  
BTH\_II0295 drug resistance transporter, EmrB/QacA family  
BTH\_II0296 moeZ  
BTH\_II0297 lpqC, putative  
BTH\_II0298 hypothetical protein  
BTH\_II0299 unnamed protein product; Highly similar to oxygen-independent coproporphyrinogen III oxidase, YggW protein of Escherichia coli, pu  
BTH\_II0300 bcp  
BTH\_II0301 methyltransferase, UbiE/COQ5 family  
BTH\_II0302 Uncharacterized conserved protein  
BTH\_II0303 conserved hypothetical protein  
BTH\_II0304 ThiS family domain protein, putative  
BTH\_II0305 probable isovaleryl-CoA dehydrogenase, putative  
BTH\_II0306 hypothetical protein  
BTH\_II0307 carbohydrate kinase, FGGY family, putative  
BTH\_II0308 hypothetical protein  
BTH\_II0309 Sphingosine-1-phosphate lyase (SP-lyase) (SPL)(Sphingosine-1-phosphate aldolase)  
BTH\_II0311 Sphingosine-1-phosphate lyase 1 (SP-lyase) (SPL)(Sphingosine-1-phosphate aldolase)  
BTH\_II0312 Protein of unknown function (DUF636) family  
BTH\_II0313 conserved within *P. aerophilum*  
BTH\_II0316 4-hydroxyphenylacetate 3-monooxygenase, reductase component  
BTH\_II0317 DNA-binding response regulator, LuxR family  
BTH\_II0318 putative oxidoreductase, oxygen dependent, FAD-dependent protein  
BTH\_II0319 3-oxoacyl-acyl carrier protein reductase  
BTH\_II0320 pyrazinamidase/nicotinamidase  
BTH\_II0321 hypothetical protein  
BTH\_II0322 hypothetical protein  
BTH\_II0323 phenol hydroxylase, putative  
BTH\_II0324 sensory box histidine kinase, putative

BTH\_II0325 putative tautomerase  
BTH\_II0326 Ring hydroxylating beta subunit family  
BTH\_II0327 benzoate 1,2-dioxygenase, alpha subunit  
BTH\_II0328 transcriptional regulator, LysR family  
BTH\_II0329 oxidoreductase  
BTH\_II0330 phenylacetaldehyde dehydrogenase  
BTH\_II0331 GMC oxidoreductase  
BTH\_II0332 MFS transporter, phthalate permease family, putative  
BTH\_II0333 outer membrane porin, putative  
BTH\_II0334 transcriptional regulator, LysR family  
BTH\_II0335 transcriptional regulator, AraC family  
BTH\_II0336 conserved hypothetical protein  
BTH\_II0337 3-hydroxyacyl-CoA dehydrogenase, putative  
BTH\_II0338 major facilitator family transporter  
BTH\_II0341 ribosomal protein L15  
BTH\_II0342 glycosyl transferase, group 2 family protein, putative  
BTH\_II0344 lipoprotein, putative  
BTH\_II0349 PROBABLE GLUCONATE 5-DEHYDROGENASE OXIDOREDUCTASE PROTEIN  
BTH\_II0350 transcriptional regulator, LysR family  
BTH\_II0351 conserved hypothetical protein  
BTH\_II0352 thermoresistant gluconokinase  
BTH\_II0353 major facilitator family transporter  
BTH\_II0354 transposase, putative  
BTH\_II0355 Transposase (IS4 family)  
BTH\_II0356 IS407A, transposase OrfA  
BTH\_II0357 transposase fragment  
BTH\_II0358 transposase, Mutator family  
BTH\_II0359 conserved hypothetical protein  
BTH\_II0360 carboxymuconolactone decarboxylase  
BTH\_II0361 conserved hypothetical protein  
BTH\_II0362 succinate dehydrogenase, iron-sulfur protein  
BTH\_II0363 conserved hypothetical protein  
BTH\_II0364 Protein of unknown function, DUF488 superfamily  
BTH\_II0365 RC180  
BTH\_II0366 transposase  
BTH\_II0367 transposase  
BTH\_II0368 conserved hypothetical protein  
BTH\_II0369 hypothetical protein  
BTH\_II0370 conserved hypothetical protein  
BTH\_II0372 beta-lactamase  
BTH\_II0377 hypothetical protein  
BTH\_II0378 hypothetical protein  
BTH\_II0392 HYPOTHETICAL SIGNAL PEPTIDE PROTEIN  
BTH\_II0408 Pyridoxamine 5'-phosphate oxidase family  
BTH\_II0415 6-phosphofructokinase  
BTH\_II0418 poly-beta-hydroxybutyrate polymerase  
BTH\_II0421 ATP synthase gene 1, putative  
BTH\_II0429 hypothetical protein  
BTH\_II0430 conserved hypothetical protein

BTH\_II0431 transposase, Mutator family  
BTH\_II0432 hypothetical protein  
BTH\_II0433 hypothetical protein  
BTH\_II0434 cytochrome P450-related protein  
BTH\_II0435 transposase, putative  
BTH\_II0436 Transposase (IS4 family)  
BTH\_II0438 RND efflux system, cytoplasmic membrane extrusion protein  
BTH\_II0441 transcriptional regulator, TetR family  
BTH\_II0447 RND efflux system, outer membrane lipoprotein, NodT family  
BTH\_II0448 polysaccharide deacetylase domain protein  
BTH\_II0450 adenylsulfate kinase  
BTH\_II0451 conserved hypothetical protein  
BTH\_II0457 cytochrome c family protein  
BTH\_II0462 metallo-beta-lactamase family protein  
BTH\_II0469 carboxylesterase family protein  
BTH\_II0475 conserved hypothetical protein  
BTH\_II0476 transcriptional regulator lysR family  
BTH\_II0494 acetyltransferase, GNAT family  
BTH\_II0499 conserved hypothetical protein  
BTH\_II0503 CheR methyltransferase, SAM binding/TPR domain protein  
BTH\_II0505 chemotaxis sensor histidine kinase, putative  
BTH\_II0509 CAAX amino terminal protease family protein  
BTH\_II0510 conserved hypothetical protein  
BTH\_II0512 tryptophanyl-tRNA synthetase  
BTH\_II0513 transcriptional regulator, AraC family  
BTH\_II0516 dyp-type peroxidase family protein  
BTH\_II0526 major facilitator family transporter  
BTH\_II0535 conserved hypothetical protein  
BTH\_II0556 conserved hypothetical protein  
BTH\_II0573 Transposase (IS4 family)  
BTH\_II0574 transposase, putative  
BTH\_II0578 hypothetical protein  
BTH\_II0580 ebsC protein, putative  
BTH\_II0589 CHAD domain family  
BTH\_II0598 transcriptional regulator, MarR family  
BTH\_II0603 hypothetical protein  
BTH\_II0607 conserved hypothetical protein  
BTH\_II0623 Bbp50  
BTH\_II0624 Putative transposase Rv3428c  
BTH\_II0625 transposase, Mutator family  
BTH\_II0637 conserved hypothetical protein  
BTH\_II0647 hypothetical protein  
BTH\_II0648 hypothetical protein  
BTH\_II0650 conserved hypothetical protein  
BTH\_II0668 hypothetical protein  
BTH\_II0676 probable transmembrane protein  
BTH\_II0692 hypothetical protein  
BTH\_II0696 hypothetical protein  
BTH\_II0702 outer membrane porin OpcP

BTH\_II0705 conserved hypothetical protein  
BTH\_II0713 hypothetical protein  
BTH\_II0714 integrase, putative  
BTH\_II0716 transposase  
BTH\_II0717 transposase  
BTH\_II0718 hypothetical protein  
BTH\_II0719 streptavidin, putative  
BTH\_II0720 hypothetical protein  
BTH\_II0721 glutamyl-tRNA, putative  
BTH\_II0724 transcriptional regulator, IclR family, putative  
BTH\_II0726 4-hydroxybenzoate transporter  
BTH\_II0729 conserved hypothetical protein  
BTH\_II0734 conserved hypothetical protein  
BTH\_II0737 syringomycin biosynthesis enzyme, putative  
BTH\_II0738 Transposase (IS4 family)  
BTH\_II0739 transposase, putative  
BTH\_II0740 hypothetical protein  
BTH\_II0741 conserved hypothetical protein  
BTH\_II0746 conserved hypothetical protein  
BTH\_II0748 HrpB2-like protein  
BTH\_II0749 conserved hypothetical protein  
BTH\_II0753 Surface presentation of antigens (SPOA) protein domain protein  
BTH\_II0756 conserved hypothetical protein  
BTH\_II0757 hypothetical protein  
BTH\_II0760 hypothetical protein  
BTH\_II0763 hrp protein, putative  
BTH\_II0764 conserved hypothetical protein  
BTH\_II0767 type II/III secretion system family protein  
BTH\_II0774 type IV pilus biogenesis protein, putative  
BTH\_II0776 type IV prepilin  
BTH\_II0778 hypothetical protein  
BTH\_II0779 hypothetical protein  
BTH\_II0780 hypothetical protein  
BTH\_II0786 hypothetical protein  
BTH\_II0787 predicted ATP-dependent protease  
BTH\_II0788 hypothetical protein  
BTH\_II0789 hipB domain protein  
BTH\_II0790 conserved hypothetical protein  
BTH\_II0792 endo-1,4-D-glucanase  
BTH\_II0793 cellulose synthase operon protein C  
BTH\_II0794 conserved hypothetical protein  
BTH\_II0795 hypothetical protein  
BTH\_II0796 cellulose biosynthesis protein, putative  
BTH\_II0799 alpha-ketoglutarate-dependent taurine dioxygenase  
BTH\_II0804 N-acyl homoserine lactone synthase  
BTH\_II0808 conserved hypothetical protein  
BTH\_II0810 LysE family protein  
BTH\_II0817 conserved hypothetical protein  
BTH\_II0819 transcriptional regulator, putative



BTH\_II0820 hypothetical protein  
BTH\_II0821 conserved hypothetical protein  
BTH\_II0826 type III secretion system protein BsaM  
BTH\_II0834 BsaU protein  
BTH\_II0845 conserved hypothetical protein  
BTH\_II0853 transcriptional regulator, araC family  
BTH\_II0854 ubiquitin-specific proteinase 31, putative  
BTH\_II0855 lipoprotein, putative  
BTH\_II0858 conserved hypothetical protein  
BTH\_II0860 lipoprotein, putative  
BTH\_II0861 pentapeptide repeat family protein, putative  
BTH\_II0862 pentapeptide repeat family protein  
BTH\_II0864 ATP-dependent Clp protease, ATP-binding subunit ClpB  
BTH\_II0867 Protein of unknown function (DUF1316) subfamily, putative  
BTH\_II0868 hcp protein  
BTH\_II0873 ImpA-related N-terminal family  
BTH\_II0874 conserved hypothetical protein  
BTH\_II0875 Hep\_Hag family  
BTH\_II0877 N-acetylmuramoyl-L-alanine amidase domain protein  
BTH\_II0878 hemagglutinin domain protein  
BTH\_II0885 TetR-family transcriptional regulator  
BTH\_II0889 transcriptional regulator, DeoR family  
BTH\_II0892 oxidoreductase, FAD-binding  
BTH\_II0893 addiction module antitoxin, Axe family subfamily, putative  
BTH\_II0895 conserved hypothetical protein  
BTH\_II0899 AppE family protein  
BTH\_II0900 nitrate reductase/sulfite reductase flavoprotein alpha-component, putative  
BTH\_II0901 conserved hypothetical protein  
BTH\_II0905 transcriptional regulator lacl family  
BTH\_II0906 PTS system, glucose-specific EIIA/HPr/phosphoenolpyruvate-protein phosphotransferase components  
BTH\_II0907 1-phosphofructokinase  
BTH\_II0908 protein-N p-phosphohistidine-sugar phosphotransferase  
BTH\_II0909 acetyltransferase, GNAT family  
BTH\_II0912 hypothetical exported protein  
BTH\_II0913 O-methyltransferase  
BTH\_II0914 transcriptional regulatory protein  
BTH\_II0915 hypothetical protein  
BTH\_II0916 chaperonin GroEL  
BTH\_II0917 conserved hypothetical protein  
BTH\_II0918 ribose-phosphate pyrophosphokinase  
BTH\_II0919 glutamine-dependent NAD<sup>+</sup> synthetase  
BTH\_II0920 CBS domain protein  
BTH\_II0921 conserved hypothetical protein  
BTH\_II0923 hypothetical protein  
BTH\_II0924 heat shock protein, HSP20 family  
BTH\_II0925 beta-lactamase, putative  
BTH\_II0926 conserved hypothetical protein  
BTH\_II0927 acetyl-CoA synthetase  
BTH\_II0928 probable pyruvate dehydrogenase, E1 component, alpha subunit

BTH\_II0929 pyruvate dehydrogenase complex, E1 component, pyruvate dehydrogenase beta subunit  
BTH\_II0930 probable pyruvate dehydrogenase, E2 component, dihydrolipoamide acetyltransferase  
BTH\_II0931 Predicted orf  
BTH\_II0932 DNA-binding response regulator, LuxR family, putative  
BTH\_II0933 Rhs element Vgr protein, putative  
BTH\_II0934 conserved hypothetical protein  
BTH\_II0935 transposase, putative  
BTH\_II0936 Transposase (IS4 family)  
BTH\_II0937 conserved hypothetical protein  
BTH\_II0938 glycogen operon protein GlgX  
BTH\_II0939 1,4-alpha-glucan branching enzyme (Glycogen branchingenzyme) (BE) (1,4-alpha-D-glucan:1,4-alpha-D-glucan 6-glucosyl-transferase)  
BTH\_II0940 glycogen synthase  
BTH\_II0941 glycogen phosphorylase family protein  
BTH\_II0942 conserved hypothetical protein  
BTH\_II0943 AMP-binding domain protein  
BTH\_II0954 YadA-like C-terminal region protein  
BTH\_II0955 TPR Domain domain protein  
BTH\_II0956 conserved hypothetical protein  
BTH\_II0957 outer membrane protein, putative  
BTH\_II0960 glyoxalase family protein family  
BTH\_II0963 conserved hypothetical protein  
BTH\_II0964 hypothetical protein  
BTH\_II0966 glycine betaine/L-proline ABC transporter, ATP-binding protein  
BTH\_II0970 hypothetical protein  
BTH\_II0971 Aspartyl/Asparaginyl beta-hydroxylase family  
BTH\_II0981 hydrolase, putative  
BTH\_II0982 D-3-phosphoglycerate dehydrogenase, putative  
BTH\_II0983 ribose operon repressor, putative  
BTH\_II0984 TRAP transporter, DctM subunit subfamily, putative  
BTH\_II0985 Bacterial extracellular solute-binding protein, family 7 superfamily  
BTH\_II0986 hypothetical protein  
BTH\_II0987 possible glutathione S-transferase P subunit  
BTH\_II0988 Transposase (IS4 family)  
BTH\_II0989 transposase, putative  
BTH\_II0991 transcriptional regulator, AraC family  
BTH\_II0993 hypothetical protein  
BTH\_II0994 transcriptional regulator, AraC family, putative  
BTH\_II1005 glyoxylate reductase  
BTH\_II1007 sensory box histidine kinase  
BTH\_II1011 integrase-like protein  
BTH\_II1012 gp38  
BTH\_II1013 gp44  
BTH\_II1014 gp45  
BTH\_II1015 gp41  
BTH\_II1016 gp42  
BTH\_II1019 gp40-related protein  
BTH\_II1020 hypothetical protein  
BTH\_II1022 gp50  
BTH\_II1023 gp51

BTH\_II1024 gp52  
BTH\_II1025 gp63  
BTH\_II1026 gp64  
BTH\_II1027 gp65  
BTH\_II1028 MTE8-ECOLI homolog similar to methyltransferase  
BTH\_II1029 gp56  
BTH\_II1030 gp57  
BTH\_II1031 gp58  
BTH\_II1032 gp69  
BTH\_II1033 gp60  
BTH\_II1034 gp72  
BTH\_II1035 gp62  
BTH\_II1036 gp74  
BTH\_II1037 gp64  
BTH\_II1038 gp65  
BTH\_II1039 hypothetical protein  
BTH\_II1040 pANL56  
BTH\_II1042 59R  
BTH\_II1043 conserved hypothetical phage protein  
BTH\_II1044 phage terminase, large subunit, putative  
BTH\_II1045 head portal protein  
BTH\_II1046 ClpP protease  
BTH\_II1047 phage major capsid protein, HK97 family  
BTH\_II1048 hypothetical protein  
BTH\_II1049 gp7  
BTH\_II1050 phage head-tail adaptor, putative  
BTH\_II1051 phage protein, HK97 gp10 family  
BTH\_II1052 gp10  
BTH\_II1053 gp11  
BTH\_II1054 Phage tail assembly chaperone  
BTH\_II1055 gp13  
BTH\_II1056 gp14  
BTH\_II1057 Phage minor tail protein  
BTH\_II1058 gp16  
BTH\_II1059 phage minor tail protein L  
BTH\_II1060 gp19  
BTH\_II1061 Bacteriophage lambda tail assembly protein I  
BTH\_II1062 host specificity protein J, truncation  
BTH\_II1063 gp21  
BTH\_II1064 gp22  
BTH\_II1065 holin  
BTH\_II1066 conserved hypothetical protein  
BTH\_II1067 gp23  
BTH\_II1068 gp26  
BTH\_II1069 gp28  
BTH\_II1070 MFS transporter, putative  
BTH\_II1078 hypothetical protein  
BTH\_II1082 transposase, Mutator family  
BTH\_II1090 conserved hypothetical protein

BTH\_II1092 di-haem cytochrome c peroxidase family protein  
BTH\_II1095 major facilitator family transporter  
BTH\_II1098 hydrolase, haloacid dehalogenase-like family, putative  
BTH\_II1102 hypothetical protein  
BTH\_II1103 hypothetical protein  
BTH\_II1104 conserved hypothetical protein  
BTH\_II1107 conserved hypothetical protein  
BTH\_II1116 D-aminopeptidase, putative  
BTH\_II1121 conserved hypothetical protein  
BTH\_II1125 hypothetical protein  
BTH\_II1127 GGDEF domain protein  
BTH\_II1128 conserved hypothetical protein  
BTH\_II1130 ATP-dependent helicase, DEAD/DEAH family  
BTH\_II1131 hypothetical protein  
BTH\_II1132 conserved hypothetical protein  
BTH\_II1136 conserved hypothetical protein  
BTH\_II1137 hypothetical protein  
BTH\_II1143 hypothetical protein  
BTH\_II1145 membrane protein  
BTH\_II1147 conserved hypothetical protein  
BTH\_II1149 Domain of unknown function (DUF802) family  
BTH\_II1150 conserved hypothetical protein  
BTH\_II1152 hypothetical protein  
BTH\_II1153 hypothetical protein  
BTH\_II1157 aspartate racemase  
BTH\_II1158 transcriptional regulator, LysR family  
BTH\_II1159 ABC transporter, periplasmic substrate-binding protein, putative  
BTH\_II1160 alcohol dehydrogenase, zinc-containing  
BTH\_II1168 uroporphyrin-III C-methyltransferase  
BTH\_II1183 DedA family family  
BTH\_II1184 heavy metal efflux pump CzcA, putative  
BTH\_II1185 metal ion efflux membrane fusion protein family, putative  
BTH\_II1186 divalent cation resistant determinant protein C, putative  
BTH\_II1187 conserved hypothetical protein  
BTH\_II1188 sensor histidine kinase, putative  
BTH\_II1189 response regulator, interruption-N  
BTH\_II1193 FF domain protein  
BTH\_II1200 isochorismatase family protein  
BTH\_II1206 conserved hypothetical protein  
BTH\_II1208 transcriptional regulator, GntR family  
BTH\_II1211 polyketide synthase  
BTH\_II1213 peptide synthetase homolog  
BTH\_II1220 transcriptional regulator, IclR family  
BTH\_II1221 metabolite-proton symporter  
BTH\_II1222 4-hydroxyphenylpyruvate dioxygenase  
BTH\_II1228 conserved hypothetical protein  
BTH\_II1230 hypothetical protein  
BTH\_II1233 peptide synthetase, putative  
BTH\_II1237 thio-template mechanism natural product synthetase

BTH\_II1244 transcriptional regulator, Crp/Fnr family  
BTH\_II1246 hypothetical protein  
BTH\_II1247 DNA-binding response regulator, LuxR family  
BTH\_II1255 conserved hypothetical protein  
BTH\_II1265 POSSIBLE FORMATE HYDROGENASE HYCQ  
BTH\_II1267 conserved hypothetical protein  
BTH\_II1273 2,4-dienoyl-CoA reductase  
BTH\_II1291 HlyD family secretion protein  
BTH\_II1292 ABC transporter, ATP binding/permease protein  
BTH\_II1293 ABC transporter, ATP-binding protein  
BTH\_II1294 ABC transporter, ATP-binding protein  
BTH\_II1295 ABC transporter permease protein  
BTH\_II1296 conserved hypothetical protein  
BTH\_II1297 conserved hypothetical protein  
BTH\_II1300 amino acid permease  
BTH\_II1308 putative exported protein  
BTH\_II1311 Mg<sup>2+</sup>-importing ATPase, putative  
BTH\_II1312 conserved hypothetical protein  
BTH\_II1313 Uncharacterized conserved protein  
BTH\_II1314 Uncharacterized conserved protein  
BTH\_II1315 conserved hypothetical protein  
BTH\_II1316 hypothetical protein  
BTH\_II1317 hypothetical protein  
BTH\_II1323 ProP effector  
BTH\_II1327 PROBABLE PHAGE-RELATED TAIL TRANSMEMBRANE PROTEIN  
BTH\_II1354 pANL56  
BTH\_II1355 pANL12  
BTH\_II1364 DNA methyltransferase XF1774  
BTH\_II1365 gp51  
BTH\_II1370 cystathionine beta-synthase  
BTH\_II1372 hypothetical protein  
BTH\_II1373 heavy metal resistance protein CzcC  
BTH\_II1378 conserved hypothetical protein  
BTH\_II1384 conserved hypothetical protein  
BTH\_II1385 YceI like family protein  
BTH\_II1386 conserved hypothetical protein  
BTH\_II1390 CAAX protease family protein  
BTH\_II1392 phenylacetate-CoA ligase  
BTH\_II1396 conserved hypothetical protein  
BTH\_II1398 conserved hypothetical protein  
BTH\_II1399 methyltransferase, FkbM family domain protein  
BTH\_II1400 response regulator  
BTH\_II1402 transposase fragment  
BTH\_II1405 conserved hypothetical protein  
BTH\_II1411 membrane protein, putative  
BTH\_II1419 conserved hypothetical protein  
BTH\_II1420 conserved hypothetical protein  
BTH\_II1424 conserved hypothetical protein  
BTH\_II1430 hypothetical protein

BTH\_II1431 conserved hypothetical protein  
BTH\_II1433 conserved hypothetical protein  
BTH\_II1434 YD repeat protein  
BTH\_II1435 conserved hypothetical protein  
BTH\_II1437 conserved hypothetical protein  
BTH\_II1438 hypothetical protein  
BTH\_II1439 hypothetical protein  
BTH\_II1447 transcriptional regulator, LysR family, putative  
BTH\_II1451 lipoprotein NlpD, putative  
BTH\_II1452 hypothetical protein  
BTH\_II1466 membrane protein, putative  
BTH\_II1475 transcriptional regulator, LysR family  
BTH\_II1476 6-aminohexanoate-cyclic-dimer hydrolase  
BTH\_II1479 Protein of unknown function (DUF1089) superfamily  
BTH\_II1480 hypothetical protein  
BTH\_II1482 hypothetical protein  
BTH\_II1518 transposase, putative  
BTH\_II1519 Transposase (IS4 family)  
BTH\_II1521 Tat (twin-arginine translocation) pathway signal sequence domain protein  
BTH\_II1522 transcriptional regulator, ArsR family  
BTH\_II1524 acetyltransferase, GNAT family  
BTH\_II1525 transporter, putative  
BTH\_II1526 phage recombinase, putative  
BTH\_II1527 conserved hypothetical protein  
BTH\_II1528 transposase, Mutator family  
BTH\_II1529 conserved hypothetical protein  
BTH\_II1530 conserved domain protein  
BTH\_II1531 Rhs element Vgr protein, putative  
BTH\_II1534 hypothetical protein  
BTH\_II1537 phenylacetaldehyde dehydrogenase  
BTH\_II1538 transcriptional regulator, LuxR family  
BTH\_II1540 conserved hypothetical protein  
BTH\_II1546 N-carbamyl-L-amino acid amidohydrolase  
BTH\_II1547 L-2-Amino-thiazoline-4-carboxylic acid hydrolase  
BTH\_II1548 amino acid ABC transporter, periplasmic amino acid-binding protein, putative  
BTH\_II1549 glycine cleavage system transcriptional activator  
BTH\_II1552 hypothetical protein  
BTH\_II1553 hypothetical protein  
BTH\_II1557 conserved hypothetical protein  
BTH\_II1561 hypothetical protein  
BTH\_II1577 conserved hypothetical protein  
BTH\_II1579 OmpA family domain protein  
BTH\_II1580 conserved hypothetical protein  
BTH\_II1581 hypothetical protein  
BTH\_II1582 conserved hypothetical protein  
BTH\_II1584 penicillin-binding protein 1C  
BTH\_II1585 hypothetical protein  
BTH\_II1596 conserved hypothetical protein  
BTH\_II1605 hydrolase

BTH\_II1612 redox-sensitive transcriptional activator SoxR  
BTH\_II1613 efflux transporter, RND family, MFP subunit  
BTH\_II1615 transcriptional regulator, LysR family  
BTH\_II1616 C4-dicarboxylate transporter/malic acid transport protein, putative  
BTH\_II1617 malate dehydrogenase  
BTH\_II1618 PROBABLE CYTOCHROME C OXIDASE SUBUNIT TRANSMEMBRANE PROTEIN  
BTH\_II1619 FixOc  
BTH\_II1620 outer membrane nitrite reductase, putative  
BTH\_II1621 copper-translocating P-type ATPase  
BTH\_II1622 sulfite:cytochrome c oxidoreductase subunit A  
BTH\_II1623 conserved hypothetical protein  
BTH\_II1626 L-arabinose ABC transporter, permease protein  
BTH\_II1627 L-arabinose ABC transporter, ATP-binding protein  
BTH\_II1628 L-arabinose ABC transporter, periplasmic L-arabinose-binding protein  
BTH\_II1629 dehydrogenase  
BTH\_II1630 dihydrodipicolinate synthase, putative  
BTH\_II1631 aldehyde dehydrogenase family protein  
BTH\_II1632 dihydroxy-acid dehydratase  
BTH\_II1633 transcriptional regulator, LysR family, putative  
BTH\_II1642 glyoxalase family protein  
BTH\_II1644 conserved hypothetical protein  
BTH\_II1645 hypothetical protein  
BTH\_II1654 lipoprotein NlpD, putative  
BTH\_II1655 glutamate/aspartate ABC transporter, periplasmic glutamate/aspartate-binding protein, truncation  
BTH\_II1662 hypothetical protein  
BTH\_II1663 pyruvate ferredoxin/ferredoxin oxidoreductase family protein  
BTH\_II1664 polyketide synthase, putative  
BTH\_II1665 polyketide synthase, putative  
BTH\_II1666 polyketide synthase, putative  
BTH\_II1667 polyketide synthase, putative  
BTH\_II1668 polyketide biosynthesis enoyl-CoA hydratase  
BTH\_II1669 polyketide biosynthesis enoyl-CoA hydratase  
BTH\_II1670 polyketide biosynthesis protein, interruption-N  
BTH\_II1671 polyketide beta-ketoacyl synthase, putative  
BTH\_II1672 acyl carrier protein-related protein  
BTH\_II1673 thiotemplate mechanism natural product synthetase  
BTH\_II1674 polyketide synthase  
BTH\_II1675 MmpIII  
BTH\_II1676 4-phosphopantetheinyl transferase family protein  
BTH\_II1677 PHENOLPTHIOCEROL SYNTHESIS TYPE-I POLYKETIDE SYNTHASE PPSA  
BTH\_II1678 Ser/Thr protein phosphatase family  
BTH\_II1679 acetyl-CoA carboxylase, carboxyl transferase, alpha subunit  
BTH\_II1680 hypothetical protein  
BTH\_II1681 autoinducer-binding transcriptional regulator, LuxR family, putative  
BTH\_II1682 hypothetical protein  
BTH\_II1685 conserved hypothetical protein  
BTH\_II1687 cyclic nucleotide-binding domain protein  
BTH\_II1688 transcriptional regulator, AraC family, putative  
BTH\_II1689 hypothetical protein

BTH\_II1690 LysE family protein, putative  
BTH\_II1691 multidrug efflux membrane protein, putative  
BTH\_II1694 D-beta-hydroxybutyrate dehydrogenase  
BTH\_II1697 acetyltransferase, GNAT family , putative  
BTH\_II1701 hypothetical protein  
BTH\_II1702 transcriptional regulator, TetR family  
BTH\_II1703 uncharacterized domain protein  
BTH\_II1704 Mmch, putative  
BTH\_II1705 oxidoreductase, 2OG-Fe(II) oxygenase family superfamily  
BTH\_II1706 radical SAM domain protein protein  
BTH\_II1707 radical SAM domain protein protein  
BTH\_II1708 unnamed protein product  
BTH\_II1709 ThiS family domain protein, putative  
BTH\_II1710 carbamoyltransferase family protein  
BTH\_II1711 conserved hypothetical protein  
BTH\_II1714 Domain of unknown function  
BTH\_II1716 hypothetical protein  
BTH\_II1718 hypothetical protein  
BTH\_II1719 hypothetical protein  
BTH\_II1721 hypothetical protein  
BTH\_II1722 MOSC domain protein  
BTH\_II1724 DNA-binding response regulator TctD  
BTH\_II1738 MltA-interacting protein MipA family  
BTH\_II1744 conserved hypothetical protein  
BTH\_II1751 transcriptional regulator, LuxR family  
BTH\_II1756 acetyltransferase (GNAT) family protein  
BTH\_II1757 membrane protein, putative  
BTH\_II1765 DNA-binding response regulator  
BTH\_II1772 HD domain protein  
BTH\_II1773 HD domain protein  
BTH\_II1774 serine protease, subtilase family  
BTH\_II1775 hypothetical protein  
BTH\_II1776 hypothetical protein  
BTH\_II1777 hypothetical protein  
BTH\_II1778 cytochrome c  
BTH\_II1779 cytochrome c family protein  
BTH\_II1781 outer membrane protein, OMP85 family, putative  
BTH\_II1784 glutaminase A  
BTH\_II1785 transposase, mutator family, truncation-related protein  
BTH\_II1786 conserved hypothetical protein  
BTH\_II1787 gp26  
BTH\_II1788 glutaminase A  
BTH\_II1794 transcriptional regulator, TetR family domain protein  
BTH\_II1795 long-chain-fatty-acid--CoA ligase  
BTH\_II1796 long-chain-fatty-acid--CoA ligase  
BTH\_II1797 acyl-CoA synthetase  
BTH\_II1811 hypothetical protein  
BTH\_II1813 conserved hypothetical protein  
BTH\_II1815 hypothetical protein



BTH\_II1817 putative integral membrane protein  
BTH\_II1827 pyochelin synthetase PA4225  
BTH\_II1828 pyochelin synthetase  
BTH\_II1844 hypothetical protein  
BTH\_II1873 levanase  
BTH\_II1874 conserved hypothetical protein  
BTH\_II1878 hypothetical protein  
BTH\_II1903 coenzyme A transferase  
BTH\_II1911 DJ-1/Pfpl family protein  
BTH\_II1914 hydrolase, alpha/beta fold family  
BTH\_II1924 conserved hypothetical protein  
BTH\_II1927 alkyl hydroperoxide reductase subunit  
BTH\_II1938 chaperonin GroEL  
BTH\_II1940 conserved hypothetical protein  
BTH\_II1945 glutamine amidotransferase, class I  
BTH\_II1951 putrescine ABC transporter, permease protein  
BTH\_II1955 methyl-accepting chemotaxis protein  
BTH\_II1957 copper resistance protein, putative  
BTH\_II1960 copper tolerance protein  
BTH\_II1961 hypothetical protein  
BTH\_II1962 hypothetical protein  
BTH\_II1965 hypothetical protein  
BTH\_II1968 conserved hypothetical protein  
BTH\_II1971 conserved hypothetical protein  
BTH\_II1972 hypothetical protein  
BTH\_II1973 unnamed protein product; Some similarities with probable aminopeptidase  
BTH\_II1987 hypothetical protein  
BTH\_II1990 conserved hypothetical protein  
BTH\_II1991 hypothetical protein  
BTH\_II1996 unnamed protein product; Similar to bacteriophage integrase  
BTH\_II2004 Adenylosuccinate synthase  
BTH\_II2011 hypothetical protein  
BTH\_II2021 bacterioferritin  
BTH\_II2028 pirin family protein  
BTH\_II2042 TnpC protein  
BTH\_II2060 L-lactate transporter  
BTH\_II2061 malate synthase G  
BTH\_II2063 transcriptional regulator, AraC family  
BTH\_II2073 drug resistance transporter, EmrB/QacA family protein  
BTH\_II2075 conserved hypothetical protein  
BTH\_II2076 hypothetical protein  
BTH\_II2081 transcriptional regulator, GntR family  
BTH\_II2084 hypothetical protein  
BTH\_II2086 D-methionine ABC transporter, periplasmic D-methionine-binding protein  
BTH\_II2087 autoinducer-binding transcriptional regulator, LuxR family  
BTH\_II2088 thiotemplate mechanism natural product synthetase  
BTH\_II2090 syringomycin synthesis regulator SyrP, putative  
BTH\_II2093 polyketide synthase, putative  
BTH\_II2095 diaminopimelate decarboxylase, putative

BTH\_II2101 acetyltransferase, GNAT family  
BTH\_II2109 transposase, putative  
BTH\_II2110 Transposase (IS4 family)  
BTH\_II2113 hypothetical protein  
BTH\_II2114 putative 4-oxalocrotonate tautomerase  
BTH\_II2115 transcriptional regulator, LysR family  
BTH\_II2124 O-methyltransferase family protein  
BTH\_II2126 beta-ketoacyl CoA thiolase  
BTH\_II2128 transcriptional regulator, TetR family  
BTH\_II2129 major facilitator family transporter  
BTH\_II2132 O-antigen acetylase, putative  
BTH\_II2136 conserved hypothetical protein  
BTH\_II2138 conserved hypothetical protein  
BTH\_II2142 hemin ABC transporter, permease protein  
BTH\_II2147 L-allo-threonine aldolase  
BTH\_II2152 oxidoreductase, FMN-binding  
BTH\_II2153 oxidoreductase, aldo/keto reductase family  
BTH\_II2154 major facilitator family transporter  
BTH\_II2155 probable LysR-family transcriptional regulator  
BTH\_II2157 transcriptional regulator  
BTH\_II2158 NAD(P)H nitroreductase BH2236  
BTH\_II2159 lipH  
BTH\_II2160 transcriptional regulator, LysR family  
BTH\_II2161 choline dehydrogenase  
BTH\_II2162 aldehyde dehydrogenase (NAD) family protein superfamily  
BTH\_II2163 Amidohydrolase family superfamily  
BTH\_II2165 Domain of Unknown Function (DUF748) family  
BTH\_II2167 conserved hypothetical protein  
BTH\_II2171 hypothetical protein  
BTH\_II2173 hypothetical protein  
BTH\_II2174 hypothetical protein  
BTH\_II2175 hypothetical protein  
BTH\_II2182 conserved hypothetical protein  
BTH\_II2184 conserved hypothetical protein  
BTH\_II2185 uncharacterized domain 1 protein  
BTH\_II2191 methyl-accepting chemotaxis protein  
BTH\_II2192 conserved hypothetical protein  
BTH\_II2193 proline iminopeptidase  
BTH\_II2194 conserved hypothetical protein  
BTH\_II2195 glyoxalase family protein  
BTH\_II2197 transcriptional regulator, AraC family  
BTH\_II2198 conserved membrane-associated protein  
BTH\_II2199 conserved hypothetical protein  
BTH\_II2200 fumarylacetoacetate hydrolase family protein  
BTH\_II2201 transcriptional regulator, IclR family  
BTH\_II2202 transposase, degenerate  
BTH\_II2203 transposase, degenerate  
BTH\_II2209 hypothetical protein  
BTH\_II2222 conserved hypothetical protein

BTH\_II2246 ISBm1, transposase orfB, interruption-C  
BTH\_II2247 transcriptional regulator, LysR family  
BTH\_II2248 conserved hypothetical protein  
BTH\_II2249 glutamate-1-semialdehyde aminotransferase  
BTH\_II2250 conserved hypothetical protein  
BTH\_II2277 transposase, putative  
BTH\_II2278 Transposase (IS4 family)  
BTH\_II2281 translation initiation inhibitor  
BTH\_II2284 transcriptional regulator, GntR family  
BTH\_II2288 conserved hypothetical protein  
BTH\_II2289 conserved hypothetical protein  
BTH\_II2291 hypothetical protein  
BTH\_II2293 phosphatidylserine decarboxylase, putative  
BTH\_II2297 membrane protein, putative  
BTH\_II2299 conserved hypothetical protein  
BTH\_II2300 conserved hypothetical protein  
BTH\_II2302 2-oxoisovalerate dehydrogenase, E2 component, dihydrolipamide acetyltransferase  
BTH\_II2305 conserved hypothetical protein  
BTH\_II2319 hypothetical protein  
BTH\_II2320 hypothetical protein  
BTH\_II2321 stress response protein  
BTH\_II2322 polysaccharide deacetylase family protein  
BTH\_II2323 conserved hypothetical protein  
BTH\_II2326 unnamed protein product; Highly similar to unknown protein of Photorhabdus and some similarities with unknown protein, putative  
BTH\_II2332 lipoprotein, putative  
BTH\_II2333 hydrophobe/amphiphile efflux family protein  
BTH\_II2348 polyketide synthase, putative  
BTH\_II2360 conserved hypothetical protein  
BTH\_II2361 phytoene synthase, putative  
BTH\_II2368 sigma-70 factor, putative

---
