# Supplementary material for: Bacterial genome adaptation to niches: Divergence of the potential virulence genes in three Burkholderia species of different survival strategies
Source: PubMed Central journal article supplement (PMC1343551; doi:10.1186/1471-2164-6-174), 2005-12-07
Supplement: 1471-2164-6-174-S5.pdf [file 1471-2164-6-174-S5.pdf]

**Table S3. Genes up- or down-expressed *in vivo* in Fig. 3B.**

| Gene    | Description                                                           | <i>in vivo</i> expression | Divergence group |
|---------|-----------------------------------------------------------------------|---------------------------|------------------|
| BMA0011 | hypothetical protein                                                  | Groups 1&3                | 1                |
| BMA0024 | aldolase, class II                                                    | Groups 1&3                | 1                |
| BMA0030 | ElaA family protein                                                   | Groups 1&3                | 1                |
| BMA0040 | conserved hypothetical protein                                        | Groups 1&3                | 1                |
| BMA0101 | 8-amino-7-oxononanoate synthase                                       | Groups 1&3                | 1                |
| BMA0156 | HpcH/HpaI aldolase family protein                                     | Groups 1&3                | 1                |
| BMA0305 | conserved hypothetical protein, authentic point mutation              | Groups 1&3                | 1                |
| BMA0320 | xanthine/uracil permease family protein, truncation                   | Groups 1&3                | 1                |
| BMA0328 | cation ABC transporter, periplasmic cation-binding protein, putative  | Groups 1&3                | 1                |
| BMA0551 | conserved hypothetical protein                                        | Groups 1&3                | 1                |
| BMA0575 | hypothetical protein                                                  | Groups 1&3                | 1                |
| BMA0576 | YdjC-like family protein                                              | Groups 1&3                | 1                |
| BMA0678 | isoleucine biosynthesis transcriptional activator                     | Groups 1&3                | 1                |
| BMA0687 | iron compound ABC transporter, ATP-binding protein                    | Groups 1&3                | 1                |
| BMA0697 | cobyric acid synthase CobQ                                            | Groups 1&3                | 1                |
| BMA0824 | poly(3-hydroxybutyrate) depolymerase                                  | Groups 1&3                | 1                |
| BMA0887 | di-haem cytochrome c peroxidase family protein                        | Groups 1&3                | 1                |
| BMA0906 | thioesterase family protein                                           | Groups 1&3                | 1                |
| BMA0912 | iolD protein                                                          | Groups 1&3                | 1                |
| BMA0930 | fosmidomycin resistance protein                                       | Groups 1&3                | 1                |
| BMA0967 | hypothetical protein                                                  | Groups 1&3                | 1                |
| BMA0988 | cytochrome c family protein                                           | Groups 1&3                | 1                |
| BMA1044 | conserved hypothetical protein                                        | Groups 1&3                | 1                |
| BMA1058 | drug resistance transporter, EmrB/QacA family                         | Groups 1&3                | 1                |
| BMA1163 | precorrin-2 C20-methyltransferase                                     | Groups 1&3                | 1                |
| BMA1175 | cob(I)alamin adenosyltransferase                                      | Groups 1&3                | 1                |
| BMA1198 | ribose ABC transporter, periplasmic ribose-binding protein            | Groups 1&3                | 1                |
| BMA1239 | alkanesulfonate monooxygenase                                         | Groups 1&3                | 1                |
| BMA1473 | outer membrane porin, putative                                        | Groups 1&3                | 1                |
| BMA1505 | allantoicase                                                          | Groups 1&3                | 1                |
| BMA1621 | cysteine synthase/cystathionine beta-synthase family protein          | Groups 1&3                | 1                |
| BMA1634 | conserved hypothetical protein                                        | Groups 1&3                | 1                |
| BMA1637 | membrane protein, putative                                            | Groups 1&3                | 1                |
| BMA1638 | peptide synthetase-domain protein                                     | Groups 1&3                | 1                |
| BMA1683 | phosphoesterase, putative                                             | Groups 1&3                | 1                |
| BMA1684 | hydrolase, alpha/beta fold family                                     | Groups 1&3                | 1                |
| BMA1732 | nitrate reductase, beta subunit                                       | Groups 1&3                | 1                |
| BMA1854 | Ser/Thr protein phosphatase family protein                            | Groups 1&3                | 1                |
| BMA1900 | carboxymuconolactone decarboxylase family protein                     | Groups 1&3                | 1                |
| BMA1959 | MOSC domain protein                                                   | Groups 1&3                | 1                |
| BMA2110 | conserved hypothetical protein                                        | Groups 1&3                | 1                |
| BMA2131 | 6-phosphogluconolactonase                                             | Groups 1&3                | 1                |
| BMA2134 | amino acid ABC transporter, periplasmic amino acid-binding protein    | Groups 1&3                | 1                |
| BMA2152 | LysE family protein                                                   | Groups 1&3                | 1                |
| BMA2177 | branched-chain amino acid ABC transporter, permease protein, putative | Groups 1&3                | 1                |
| BMA2222 | phenazine biosynthesis protein phzF, putative                         | Groups 1&3                | 1                |
| BMA2282 | amino acid permease, truncation                                       | Groups 1&3                | 1                |
| BMA2589 | flavodoxin domain protein                                             | Groups 1&3                | 1                |
| BMA2679 | ABC transporter, ATP-binding protein                                  | Groups 1&3                | 1                |
| BMA2738 | outer membrane protein, OmpW family                                   | Groups 1&3                | 1                |

|          |                                                          |            |   |
|----------|----------------------------------------------------------|------------|---|
| BMA2777  | general secretory pathway protein K                      | Groups 1&3 | 1 |
| BMA2847  | flagellar biosynthetic protein FlhB                      | Groups 1&3 | 1 |
| BMA2855  | chemotaxis protein CheD                                  | Groups 1&3 | 1 |
| BMA2860  | chemotaxis response regulator                            | Groups 1&3 | 1 |
| BMA2908  | conserved hypothetical protein                           | Groups 1&3 | 1 |
| BMA2978  | membrane protein, putative                               | Groups 1&3 | 1 |
| BMA3132  | molybdopterin oxidoreductase family protein              | Groups 1&3 | 1 |
| BMA3168  | transcriptional regulator, GntR family                   | Groups 1&3 | 1 |
| BMA3246  | homoserine O-acetyltransferase                           | Groups 1&3 | 1 |
| BMA3297  | oxidoreductase, FAD-binding family protein               | Groups 1&3 | 1 |
| BMA3323  | flagella basal body P-ring formation protein FlgA        | Groups 1&3 | 1 |
| BMA3328  | flagellar hook protein FlgE                              | Groups 1&3 | 1 |
| BMAA0154 | sulfotransferase domain protein                          | Groups 1&3 | 1 |
| BMAA0180 | isochorismatase family protein                           | Groups 1&3 | 1 |
| BMAA0188 | transcriptional regulator CatR                           | Groups 1&3 | 1 |
| BMAA0242 | acyl-CoA dehydrogenase domain protein                    | Groups 1&3 | 1 |
| BMAA0259 | extracellular nuclease, putative                         | Groups 1&3 | 1 |
| BMAA0261 | conserved hypothetical protein                           | Groups 1&3 | 1 |
| BMAA0271 | conserved domain protein                                 | Groups 1&3 | 1 |
| BMAA0280 | membrane protein, putative                               | Groups 1&3 | 1 |
| BMAA0321 | conserved hypothetical protein                           | Groups 1&3 | 1 |
| BMAA0363 | sigma-54 dependent DNA-binding transcriptional regulator | Groups 1&3 | 1 |
| BMAA0367 | acetyltransferase, GNAT family                           | Groups 1&3 | 1 |
| BMAA0369 | indole-3-acetamide hydrolase-related protein             | Groups 1&3 | 1 |
| BMAA0394 | lipoprotein, putative                                    | Groups 1&3 | 1 |
| BMAA0407 | conserved hypothetical protein                           | Groups 1&3 | 1 |
| BMAA0410 | Rhs element Vgr protein                                  | Groups 1&3 | 1 |
| BMAA0449 | conserved hypothetical protein                           | Groups 1&3 | 1 |
| BMAA0450 | conserved hypothetical protein                           | Groups 1&3 | 1 |
| BMAA0451 | lipoprotein, putative                                    | Groups 1&3 | 1 |
| BMAA0454 | conserved hypothetical protein                           | Groups 1&3 | 1 |
| BMAA0462 | rhamnosyltransferase II                                  | Groups 1&3 | 1 |
| BMAA0468 | glutathione-independent formaldehyde dehydrogenase       | Groups 1&3 | 1 |
| BMAA0474 | oxidoreductase, FAD/FMN-binding                          | Groups 1&3 | 1 |
| BMAA0493 | conserved hypothetical protein                           | Groups 1&3 | 1 |
| BMAA0503 | hemK protein                                             | Groups 1&3 | 1 |
| BMAA0560 | arsenical resistance transcriptional regulator           | Groups 1&3 | 1 |
| BMAA0566 | transcriptional regulator, AraC family                   | Groups 1&3 | 1 |
| BMAA0577 | 2-hydroxy-3-oxopropionate reductase                      | Groups 1&3 | 1 |
| BMAA0589 | conserved hypothetical protein                           | Groups 1&3 | 1 |
| BMAA0595 | fusaric acid resistance domain protein                   | Groups 1&3 | 1 |
| BMAA0641 | hydrolase                                                | Groups 1&3 | 1 |
| BMAA0673 | hypothetical protein                                     | Groups 1&3 | 1 |
| BMAA0731 | hypothetical protein                                     | Groups 1&3 | 1 |
| BMAA0753 | SCO1/SenC family protein                                 | Groups 1&3 | 1 |
| BMAA0755 | outer membrane nitrite reductase, putative               | Groups 1&3 | 1 |
| BMAA0763 | hypothetical protein                                     | Groups 1&3 | 1 |
| BMAA0776 | transcriptional regulator, LysR family                   | Groups 1&3 | 1 |
| BMAA0785 | sensor histidine kinase                                  | Groups 1&3 | 1 |
| BMAA0848 | 4-hydroxyphenylpyruvate dioxygenase, putative            | Groups 1&3 | 1 |
| BMAA0852 | aminotransferase, class V                                | Groups 1&3 | 1 |
| BMAA0855 | ABC transporter, periplasmic substrate-binding protein   | Groups 1&3 | 1 |
| BMAA0922 | drug resistance transporter, EmrB/QacA family            | Groups 1&3 | 1 |

|          |                                                                                           |            |   |
|----------|-------------------------------------------------------------------------------------------|------------|---|
| BMAA0923 | rhamnosyltransferase family protein                                                       | Groups 1&3 | 1 |
| BMAA1042 | conserved hypothetical protein                                                            | Groups 1&3 | 1 |
| BMAA1044 | efflux transporter, RND family, MFP subunit                                               | Groups 1&3 | 1 |
| BMAA1045 | hydrophobe/amphiphile efflux family protein                                               | Groups 1&3 | 1 |
| BMAA1062 | conserved hypothetical protein                                                            | Groups 1&3 | 1 |
| BMAA1091 | regulatory protein NasS, putative                                                         | Groups 1&3 | 1 |
| BMAA1098 | acetylpolyamine aminohydrolase, putative                                                  | Groups 1&3 | 1 |
| BMAA1104 | oxidoreductase, short chain dehydrogenase/reductase family                                | Groups 1&3 | 1 |
| BMAA1128 | ABC transporter, periplasmic substrate-binding protein                                    | Groups 1&3 | 1 |
| BMAA1187 | RNA polymerase sigma-70 factor, ECF subfamily                                             | Groups 1&3 | 1 |
| BMAA1190 | fumarylacetoacetate hydrolase family protein                                              | Groups 1&3 | 1 |
| BMAA1248 | serine metalloprotease MrpA                                                               | Groups 1&3 | 1 |
| BMAA1323 | outer membrane lipoprotein, OmpA/SmpA/OmlA family                                         | Groups 1&3 | 1 |
| BMAA1368 | conserved hypothetical protein                                                            | Groups 1&3 | 1 |
| BMAA1372 | conserved hypothetical protein                                                            | Groups 1&3 | 1 |
| BMAA1384 | hypothetical protein                                                                      | Groups 1&3 | 1 |
| BMAA1397 | conserved hypothetical protein                                                            | Groups 1&3 | 1 |
| BMAA1419 | proline racemase, putative                                                                | Groups 1&3 | 1 |
| BMAA1423 | malate/L-lactate dehydrogenase family protein                                             | Groups 1&3 | 1 |
| BMAA1428 | lactate permease family protein                                                           | Groups 1&3 | 1 |
| BMAA1517 | transcriptional regulator, araC family                                                    | Groups 1&3 | 1 |
| BMAA1520 | type III secretion chaperone BicP                                                         | Groups 1&3 | 1 |
| BMAA1524 | BapC protein                                                                              | Groups 1&3 | 1 |
| BMAA1540 | type III secretion system protein BsaS                                                    | Groups 1&3 | 1 |
| BMAA1621 | regulatory protein HrpB                                                                   | Groups 1&3 | 1 |
| BMAA1622 | conserved hypothetical protein                                                            | Groups 1&3 | 1 |
| BMAA1624 | conserved hypothetical protein                                                            | Groups 1&3 | 1 |
| BMAA1660 | sensory box sensor histidine kinase                                                       | Groups 1&3 | 1 |
| BMAA1683 | formate dehydrogenase, alpha subunit, selenocysteine-containing, authentic point mutation | Groups 1&3 | 1 |
| BMAA1801 | TonB protein, putative                                                                    | Groups 1&3 | 1 |
| BMAA1846 | hypothetical protein                                                                      | Groups 1&3 | 1 |
| BMAA1871 | propionate catabolism operon regulatory protein                                           | Groups 1&3 | 1 |
| BMAA1920 | quinone oxidoreductase, putative                                                          | Groups 1&3 | 1 |
| BMAA1927 | conserved domain protein                                                                  | Groups 1&3 | 1 |
| BMAA1932 | transcriptional regulator, LysR family                                                    | Groups 1&3 | 1 |
| BMAA2000 | 2-hydroxy-3-oxopropionate reductase                                                       | Groups 1&3 | 1 |
| BMAA2006 | flavin reductase domain protein                                                           | Groups 1&3 | 1 |
| BMAA2018 | conserved hypothetical protein                                                            | Groups 1&3 | 1 |
| BMAA2031 | sulfate permease family protein                                                           | Groups 1&3 | 1 |
| BMAA2082 | hypothetical protein                                                                      | Groups 1&3 | 1 |
| BMA0018  | hypothetical protein                                                                      | Groups 1&3 | 1 |
| BMA0455  | glutamine amidotransferase, class I                                                       | Groups 1&3 | 1 |
| BMA0656  | glutamine synthetase family protein                                                       | Groups 1&3 | 1 |
| BMA1051  | 2-oxoglutarate dehydrogenase, E2 component, dihydrolipoamide succinyltransferase          | Groups 1&3 | 1 |
| BMA1144  | arginine/ornithine antiporter                                                             | Groups 1&3 | 1 |
| BMA1148  | oxidoreductase, short-chain dehydrogenase/reductase family                                | Groups 1&3 | 1 |
| BMA1190  | mbtH-like protein                                                                         | Groups 1&3 | 1 |
| BMA1191  | RNA polymerase sigma-70 factor, ECF subfamily                                             | Groups 1&3 | 1 |
| BMA1205  | cys regulon transcriptional activator                                                     | Groups 1&3 | 1 |
| BMA1304  | outer membrane protein, OmpW family                                                       | Groups 1&3 | 1 |
| BMA2323  | 3-methyl-2-oxobutanoate hydroxymethyltransferase                                          | Groups 1&3 | 1 |
| BMA2726  | ABC transporter, ATP-binding protein                                                      | Groups 1&3 | 1 |
| BMA2751  | hypothetical protein                                                                      | Groups 1&3 | 1 |

|          |                                                            |            |   |
|----------|------------------------------------------------------------|------------|---|
| BMA3176  | cyd operon protein YbgT                                    | Groups 1&3 | 1 |
| BMA3179  | hypothetical protein                                       | Groups 1&3 | 1 |
| BMAA0011 | tartrate dehydrogenase                                     | Groups 1&3 | 1 |
| BMAA0089 | membrane protein, putative                                 | Groups 1&3 | 1 |
| BMAA0198 | muconolactone delta-isomerase                              | Groups 1&3 | 1 |
| BMAA0277 | hypothetical protein                                       | Groups 1&3 | 1 |
| BMAA0638 | sugar ABC transporter, ATP-binding protein                 | Groups 1&3 | 1 |
| BMAA0708 | conserved hypothetical protein                             | Groups 1&3 | 1 |
| BMAA0732 | conserved hypothetical protein                             | Groups 1&3 | 1 |
| BMAA1145 | sensor histidine kinase                                    | Groups 1&3 | 1 |
| BMAA1431 | cysteine-rich domain protein                               | Groups 1&3 | 1 |
| BMAA1511 | conserved hypothetical protein                             | Groups 1&3 | 1 |
| BMAA1529 | DNA-binding protein BprA                                   | Groups 1&3 | 1 |
| BMAA1547 | type III secretion system protein BsaM                     | Groups 1&3 | 1 |
| BMAA1548 | type III secretion system protein BsaL                     | Groups 1&3 | 1 |
| BMAA1549 | type III secretion system protein BsaK                     | Groups 1&3 | 1 |
| BMAA1662 | response regulator                                         | Groups 1&3 | 1 |
| BMAA1785 | chitin binding domain protein                              | Groups 1&3 | 1 |
| BMAA1828 | hemin ABC transporter, periplasmic hemin-binding protein   | Groups 1&3 | 1 |
| BMAA2034 | conserved hypothetical protein                             | Groups 1&3 | 1 |
| BMA0014  | hypothetical protein                                       | Groups 1&3 | 2 |
| BMA0224  | hypothetical protein                                       | Groups 1&3 | 2 |
| BMA0258  | hypothetical protein                                       | Groups 1&3 | 2 |
| BMA0357  | conserved domain protein                                   | Groups 1&3 | 2 |
| BMA0952  | RND efflux system, outer membrane lipoprotein, NodT family | Groups 1&3 | 2 |
| BMA0985  | hypothetical protein                                       | Groups 1&3 | 2 |
| BMA0989  | hypothetical protein                                       | Groups 1&3 | 2 |
| BMA1038  | penicillin amidase, putative                               | Groups 1&3 | 2 |
| BMA1113  | conserved hypothetical protein                             | Groups 1&3 | 2 |
| BMA1123  | peptide synthetase, putative                               | Groups 1&3 | 2 |
| BMA1639  | methyltransferase, putative/adenylsulfate kinase           | Groups 1&3 | 2 |
| BMA1754  | CoA transferase, CAIB/BAIF family                          | Groups 1&3 | 2 |
| BMA1944  | conserved hypothetical protein                             | Groups 1&3 | 2 |
| BMA2157  | conserved hypothetical protein                             | Groups 1&3 | 2 |
| BMA2247  | hypothetical protein                                       | Groups 1&3 | 2 |
| BMA2576  | phenylacetic acid degradation protein PaaD                 | Groups 1&3 | 2 |
| BMA2880  | 3-oxoacyl-(acyl-carrier-protein) synthase III, putative    | Groups 1&3 | 2 |
| BMA3058  | carotenoid 9,10-9',10' cleavage dioxygenase, putative      | Groups 1&3 | 2 |
| BMA3068  | hypothetical protein                                       | Groups 1&3 | 2 |
| BMA3158  | AMP-binding domain protein                                 | Groups 1&3 | 2 |
| BMA3224  | conserved hypothetical protein                             | Groups 1&3 | 2 |
| BMAA0059 | conserved hypothetical protein                             | Groups 1&3 | 2 |
| BMAA0073 | hypothetical protein                                       | Groups 1&3 | 2 |
| BMAA0098 | hypothetical protein                                       | Groups 1&3 | 2 |
| BMAA0372 | hypothetical protein                                       | Groups 1&3 | 2 |
| BMAA0522 | hypothetical protein                                       | Groups 1&3 | 2 |
| BMAA0594 | hypothetical protein                                       | Groups 1&3 | 2 |
| BMAA0616 | hypothetical protein                                       | Groups 1&3 | 2 |
| BMAA0618 | hypothetical protein                                       | Groups 1&3 | 2 |
| BMAA0619 | transcriptional regulator, MarR family                     | Groups 1&3 | 2 |
| BMAA0628 | hypothetical protein                                       | Groups 1&3 | 2 |
| BMAA0630 | aldehyde dehydrogenase (NADP) family protein               | Groups 1&3 | 2 |
| BMAA0646 | hypothetical protein                                       | Groups 1&3 | 2 |

|          |                                                   |            |   |
|----------|---------------------------------------------------|------------|---|
| BMAA0651 | H-NS histone family protein                       | Groups 1&3 | 2 |
| BMAA0664 | EAL/GGDEF domain protein                          | Groups 1&3 | 2 |
| BMAA0689 | hypothetical protein                              | Groups 1&3 | 2 |
| BMAA0752 | hypothetical protein                              | Groups 1&3 | 2 |
| BMAA0798 | multicopper oxidase domain protein                | Groups 1&3 | 2 |
| BMAA0841 | conserved hypothetical protein, degenerate        | Groups 1&3 | 2 |
| BMAA0955 | hypothetical protein                              | Groups 1&3 | 2 |
| BMAA0957 | conserved hypothetical protein                    | Groups 1&3 | 2 |
| BMAA1011 | hypothetical protein                              | Groups 1&3 | 2 |
| BMAA1032 | hypothetical protein                              | Groups 1&3 | 2 |
| BMAA1133 | transcriptional regulator, AraC family            | Groups 1&3 | 2 |
| BMAA1149 | hypothetical protein                              | Groups 1&3 | 2 |
| BMAA1151 | conserved hypothetical protein                    | Groups 1&3 | 2 |
| BMAA1162 | hypothetical protein                              | Groups 1&3 | 2 |
| BMAA1164 | membrane protein, putative                        | Groups 1&3 | 2 |
| BMAA1184 | conserved hypothetical protein                    | Groups 1&3 | 2 |
| BMAA1202 | polyketide synthase, putative, degenerate         | Groups 1&3 | 2 |
| BMAA1211 | hypothetical protein                              | Groups 1&3 | 2 |
| BMAA1252 | hypothetical protein                              | Groups 1&3 | 2 |
| BMAA1390 | conserved hypothetical protein                    | Groups 1&3 | 2 |
| BMAA1434 | hypothetical protein                              | Groups 1&3 | 2 |
| BMAA1486 | O-methyltransferase family protein                | Groups 1&3 | 2 |
| BMAA1498 | O-antigen acetylase, putative                     | Groups 1&3 | 2 |
| BMAA1568 | serine protease, kumamolysin                      | Groups 1&3 | 2 |
| BMAA1617 | hrp protein, putative                             | Groups 1&3 | 2 |
| BMAA1619 | hypothetical protein                              | Groups 1&3 | 2 |
| BMAA1690 | luciferase-like monooxygenase                     | Groups 1&3 | 2 |
| BMAA1757 | hemolysin activator protein, HlyB family          | Groups 1&3 | 2 |
| BMAA1841 | glyoxalase family protein                         | Groups 1&3 | 2 |
| BMAA1842 | hypothetical protein                              | Groups 1&3 | 2 |
| BMAA1865 | conserved hypothetical protein                    | Groups 1&3 | 2 |
| BMAA1875 | hypothetical protein                              | Groups 1&3 | 2 |
| BMAA1895 | conserved domain protein                          | Groups 1&3 | 2 |
| BMAA1902 | conserved hypothetical protein                    | Groups 1&3 | 2 |
| BMAA1912 | conserved hypothetical protein                    | Groups 1&3 | 2 |
| BMAA1925 | hypothetical protein                              | Groups 1&3 | 2 |
| BMAA1970 | conserved hypothetical protein                    | Groups 1&3 | 2 |
| BMAA1973 | conserved hypothetical protein                    | Groups 1&3 | 2 |
| BMAA1983 | hypothetical protein                              | Groups 1&3 | 2 |
| BMAA1986 | ADP-heptose--LPS heptosyltransferase II, putative | Groups 1&3 | 2 |
| BMAA1987 | glycosyl transferase, group 2 family protein      | Groups 1&3 | 2 |
| BMAA1995 | conserved domain protein                          | Groups 1&3 | 2 |
| BMAA2016 | hypothetical protein                              | Groups 1&3 | 2 |
| BMAA2045 | major facilitator family transporter              | Groups 1&3 | 2 |
| BMAA2047 | molybdopterin oxidoreductase family protein       | Groups 1&3 | 2 |
| BMA3052  | nitrite/sulfite reductase family protein          | Groups 1&3 | 2 |
| BMAA0023 | cytochrome P450-related protein                   | Groups 1&3 | 2 |
| BMAA0703 | DNA-binding response regulator, LuxR family       | Groups 1&3 | 2 |
| BMAA0728 | hypothetical protein                              | Groups 1&3 | 2 |
| BMAA0751 | N-acetylmuramoyl-L-alanine amidase domain protein | Groups 1&3 | 2 |
| BMAA1395 | cyclic nucleotide-binding domain protein          | Groups 1&3 | 2 |
| BMAA1488 | hypothetical protein                              | Groups 1&3 | 2 |
| BMAA2014 | hypothetical protein                              | Groups 1&3 | 2 |

|          |                                                                                          |            |   |
|----------|------------------------------------------------------------------------------------------|------------|---|
| BMA0016  | hypothetical protein                                                                     | Groups 1&3 | 4 |
| BMA1194  | carbohydrate kinase, FGGY family                                                         | Groups 1&3 | 4 |
| BMA0017  | hypothetical protein                                                                     | Groups 1&3 | 3 |
| BMA0267  | conserved domain protein, truncation                                                     | Groups 1&3 | 3 |
| BMA0642  | conserved hypothetical protein, degenerate                                               | Groups 1&3 | 3 |
| BMA0702  | hypothetical protein                                                                     | Groups 1&3 | 3 |
| BMA2007  | hypothetical protein                                                                     | Groups 1&3 | 3 |
| BMA3012  | hypothetical protein                                                                     | Groups 1&3 | 3 |
| BMA3300  | hypothetical protein                                                                     | Groups 1&3 | 3 |
| BMAA0323 | hypothetical protein                                                                     | Groups 1&3 | 3 |
| BMAA0326 | hypothetical protein                                                                     | Groups 1&3 | 3 |
| BMAA0386 | D-serine dehydratase, authentic frameshift                                               | Groups 1&3 | 3 |
| BMAA0562 | hypothetical protein                                                                     | Groups 1&3 | 3 |
| BMAA0597 | hypothetical protein                                                                     | Groups 1&3 | 3 |
| BMAA0610 | di-haem cytochrome c peroxidase family protein                                           | Groups 1&3 | 3 |
| BMAA0775 | hypothetical protein                                                                     | Groups 1&3 | 3 |
| BMAA0825 | hypothetical protein                                                                     | Groups 1&3 | 3 |
| BMAA0838 | hypothetical protein                                                                     | Groups 1&3 | 3 |
| BMAA0895 | hypothetical protein                                                                     | Groups 1&3 | 3 |
| BMAA0985 | hypothetical protein                                                                     | Groups 1&3 | 3 |
| BMAA1109 | hypothetical protein                                                                     | Groups 1&3 | 3 |
| BMAA1116 | conserved hypothetical protein                                                           | Groups 1&3 | 3 |
| BMAA1354 | hypothetical protein                                                                     | Groups 1&3 | 3 |
| BMAA1383 | hypothetical protein                                                                     | Groups 1&3 | 3 |
| BMAA1475 | porin, degenerate                                                                        | Groups 1&3 | 3 |
| BMAA1526 | BapA protein                                                                             | Groups 1&3 | 3 |
| BMAA1625 | type III secretion inner membrane protein, authentic frameshift                          | Groups 1&3 | 3 |
| BMAA1887 | hypothetical protein                                                                     | Groups 1&3 | 3 |
| BMAA1935 | hypothetical protein                                                                     | Groups 1&3 | 3 |
| BMAA1945 | hypothetical protein                                                                     | Groups 1&3 | 3 |
| BMA0605  | conserved hypothetical protein                                                           | Groups 1&3 | 3 |
| BMA0001  | chromosomal replication initiator protein DnaA                                           | Group 2    | 1 |
| BMA0002  | DNA polymerase III, beta subunit                                                         | Group 2    | 1 |
| BMA0083  | conserved hypothetical protein                                                           | Group 2    | 1 |
| BMA0084  | arginyl-tRNA synthetase                                                                  | Group 2    | 1 |
| BMA0094  | isocitrate dehydrogenase kinase/phosphatase                                              | Group 2    | 1 |
| BMA0097  | oxidoreductase, short chain dehydrogenase/reductase family                               | Group 2    | 1 |
| BMA0188  | conserved hypothetical protein                                                           | Group 2    | 1 |
| BMA0189  | 2-polyprenylphenol 6-hydroxylase                                                         | Group 2    | 1 |
| BMA0192  | conserved hypothetical protein                                                           | Group 2    | 1 |
| BMA0213  | lactoylglutathione lyase                                                                 | Group 2    | 1 |
| BMA0221  | magnesium and cobalt efflux protein CorC                                                 | Group 2    | 1 |
| BMA0275  | succinyl-CoA synthase, beta subunit                                                      | Group 2    | 1 |
| BMA0292  | conserved hypothetical protein                                                           | Group 2    | 1 |
| BMA0310  | serine protease                                                                          | Group 2    | 1 |
| BMA0315  | efflux transporter, RND family, MFP subunit                                              | Group 2    | 1 |
| BMA0317  | RND efflux system, outer membrane lipoprotein, NodT family                               | Group 2    | 1 |
| BMA0333  | maltose/mannitol ABC transporter, periplasmic maltose/mannitol-binding protein, putative | Group 2    | 1 |
| BMA0335  | maltose/mannitol ABC transporter, permease protein, putative                             | Group 2    | 1 |
| BMA0337  | maltose/mannitol ABC transporter, ATP-binding protein, putative                          | Group 2    | 1 |
| BMA0351  | tryptophan 2,3-dioxygenase family protein                                                | Group 2    | 1 |
| BMA0366  | conserved hypothetical protein TIGR00150                                                 | Group 2    | 1 |
| BMA0371  | ebsC protein, putative                                                                   | Group 2    | 1 |

|         |                                                                         |         |   |
|---------|-------------------------------------------------------------------------|---------|---|
| BMA0373 | conserved hypothetical protein                                          | Group 2 | 1 |
| BMA0375 | ornithine carbamoyltransferase                                          | Group 2 | 1 |
| BMA0377 | ribosomal protein S20                                                   | Group 2 | 1 |
| BMA0390 | conserved hypothetical protein                                          | Group 2 | 1 |
| BMA0400 | ribosomal protein L19                                                   | Group 2 | 1 |
| BMA0403 | ribosomal protein S16                                                   | Group 2 | 1 |
| BMA0428 | ribosomal protein S1                                                    | Group 2 | 1 |
| BMA0429 | cytidylate kinase                                                       | Group 2 | 1 |
| BMA0433 | phosphoserine aminotransferase                                          | Group 2 | 1 |
| BMA0435 | DNA gyrase, A subunit                                                   | Group 2 | 1 |
| BMA0436 | OmpA family protein                                                     | Group 2 | 1 |
| BMA0467 | 5-methyltetrahydropteroyltriglutamate--homocysteine S-methyltransferase | Group 2 | 1 |
| BMA0469 | fructose-1,6-bisphosphatase                                             | Group 2 | 1 |
| BMA0486 | isocitrate dehydrogenase, NADP-dependent                                | Group 2 | 1 |
| BMA0527 | conserved hypothetical protein                                          | Group 2 | 1 |
| BMA0528 | ribosomal protein L32                                                   | Group 2 | 1 |
| BMA0533 | acyl carrier protein                                                    | Group 2 | 1 |
| BMA0536 | RNA polymerase sigma-H factor                                           | Group 2 | 1 |
| BMA0541 | GTP-binding protein LepA                                                | Group 2 | 1 |
| BMA0546 | pyridoxal phosphate biosynthetic protein PdxJ                           | Group 2 | 1 |
| BMA0549 | sigma-54 dependent DNA-binding response regulator                       | Group 2 | 1 |
| BMA0550 | translation elongation factor P                                         | Group 2 | 1 |
| BMA0599 | fatty acid desaturase domain protein                                    | Group 2 | 1 |
| BMA0606 | Rrf2 family protein                                                     | Group 2 | 1 |
| BMA0619 | cyclic nucleotide-binding domain protein                                | Group 2 | 1 |
| BMA0623 | peptidase, U32 family                                                   | Group 2 | 1 |
| BMA0625 | conserved hypothetical protein                                          | Group 2 | 1 |
| BMA0626 | conserved hypothetical protein                                          | Group 2 | 1 |
| BMA0672 | cytosol aminopeptidase                                                  | Group 2 | 1 |
| BMA0673 | DNA polymerase III, chi subunit, putative                               | Group 2 | 1 |
| BMA0683 | conserved hypothetical protein                                          | Group 2 | 1 |
| BMA0699 | ParA family protein                                                     | Group 2 | 1 |
| BMA0704 | conserved hypothetical protein                                          | Group 2 | 1 |
| BMA0714 | deoxycytidine triphosphate deaminase, putative                          | Group 2 | 1 |
| BMA0715 | Orn/Lys/Arg decarboxylase                                               | Group 2 | 1 |
| BMA0741 | glutamine dependent NAD+ synthetase                                     | Group 2 | 1 |
| BMA0742 | nitrogen regulatory protein P-II                                        | Group 2 | 1 |
| BMA0743 | outer membrane porin, putative                                          | Group 2 | 1 |
| BMA0752 | hypothetical protein                                                    | Group 2 | 1 |
| BMA0770 | carbamoyl-phosphate synthase, small subunit                             | Group 2 | 1 |
| BMA0771 | homoserine/threonine efflux protein, putative                           | Group 2 | 1 |
| BMA0776 | ribosomal RNA large subunit methyltransferase J                         | Group 2 | 1 |
| BMA0797 | conserved hypothetical protein                                          | Group 2 | 1 |
| BMA0798 | hypothetical protein                                                    | Group 2 | 1 |
| BMA0864 | H-NS histone family protein                                             | Group 2 | 1 |
| BMA0890 | hypothetical protein                                                    | Group 2 | 1 |
| BMA0904 | conserved hypothetical protein                                          | Group 2 | 1 |
| BMA0926 | UTP-glucose-1-phosphate uridylyltransferase                             | Group 2 | 1 |
| BMA0976 | conserved hypothetical protein                                          | Group 2 | 1 |
| BMA1052 | 2-oxoglutarate dehydrogenase, E1 component                              | Group 2 | 1 |
| BMA1060 | ribosome-binding factor A                                               | Group 2 | 1 |
| BMA1090 | integration host factor, alpha subunit                                  | Group 2 | 1 |
| BMA1094 | ribosomal protein L35                                                   | Group 2 | 1 |

|         |                                                                    |         |   |
|---------|--------------------------------------------------------------------|---------|---|
| BMA1099 | conserved hypothetical protein                                     | Group 2 | 1 |
| BMA1145 | arginine deiminase                                                 | Group 2 | 1 |
| BMA1259 | transcriptional regulator, GntR family                             | Group 2 | 1 |
| BMA1263 | ribonuclease R                                                     | Group 2 | 1 |
| BMA1300 | putrescine ABC transporter, ATP-binding protein                    | Group 2 | 1 |
| BMA1301 | putrescine ABC transporter, periplasmic putrescine-binding protein | Group 2 | 1 |
| BMA1303 | conserved hypothetical protein                                     | Group 2 | 1 |
| BMA1319 | polyhydroxyalkanoate synthesis repressor PhaR                      | Group 2 | 1 |
| BMA1325 | competence lipoprotein ComL                                        | Group 2 | 1 |
| BMA1327 | conserved hypothetical protein                                     | Group 2 | 1 |
| BMA1328 | lipoprotein, putative                                              | Group 2 | 1 |
| BMA1333 | adenylosuccinate synthetase                                        | Group 2 | 1 |
| BMA1340 | hfq protein                                                        | Group 2 | 1 |
| BMA1348 | nucleoside diphosphate kinase                                      | Group 2 | 1 |
| BMA1355 | lipoprotein NlpD, putative                                         | Group 2 | 1 |
| BMA1364 | thioredoxin                                                        | Group 2 | 1 |
| BMA1365 | transcription termination factor Rho                               | Group 2 | 1 |
| BMA1369 | ribosomal protein L31                                              | Group 2 | 1 |
| BMA1378 | Rrf2 family protein                                                | Group 2 | 1 |
| BMA1380 | molybdopterin converting factor, subunit 2                         | Group 2 | 1 |
| BMA1395 | antioxidant, AhpC/Tsa family                                       | Group 2 | 1 |
| BMA1402 | ribosomal protein S18                                              | Group 2 | 1 |
| BMA1404 | ribosomal protein S6                                               | Group 2 | 1 |
| BMA1414 | phosphate starvation-inducible protein                             | Group 2 | 1 |
| BMA1417 | glycosyl transferase, group 1 family protein                       | Group 2 | 1 |
| BMA1426 | lipoprotein, putative                                              | Group 2 | 1 |
| BMA1433 | conserved hypothetical protein                                     | Group 2 | 1 |
| BMA1435 | hypothetical protein                                               | Group 2 | 1 |
| BMA1440 | conserved hypothetical protein                                     | Group 2 | 1 |
| BMA1453 | peptidyl-prolyl cis-trans isomerase D, putative                    | Group 2 | 1 |
| BMA1465 | ATP-dependent Clp protease, proteolytic subunit ClpP               | Group 2 | 1 |
| BMA1485 | DNA-binding response regulator RisA                                | Group 2 | 1 |
| BMA1487 | antioxidant, AhpC/Tsa family                                       | Group 2 | 1 |
| BMA1489 | 2C-methyl-D-erythritol 2,4-cyclodiphosphate synthase               | Group 2 | 1 |
| BMA1498 | PspA/IM30 family protein                                           | Group 2 | 1 |
| BMA1512 | ISBma1, transposase                                                | Group 2 | 1 |
| BMA1522 | GMP synthase                                                       | Group 2 | 1 |
| BMA1530 | TGS domain protein                                                 | Group 2 | 1 |
| BMA1533 | SPFH domain/band 7 family protein                                  | Group 2 | 1 |
| BMA1545 | UDP-3-O-3-hydroxymyristoyl glucosamine N-acyltransferase           | Group 2 | 1 |
| BMA1547 | outer membrane protein, OMP85 family                               | Group 2 | 1 |
| BMA1554 | translation elongation factor Ts                                   | Group 2 | 1 |
| BMA1555 | ribosomal protein S2                                               | Group 2 | 1 |
| BMA1602 | NLP/P60 family protein                                             | Group 2 | 1 |
| BMA1603 | hypothetical protein                                               | Group 2 | 1 |
| BMA1656 | cysteinyl-tRNA synthetase                                          | Group 2 | 1 |
| BMA1660 | UDP-2,3-diacetylglucosamine hydrolase                              | Group 2 | 1 |
| BMA1690 | 3-deoxy-8-phosphooctulonate synthase                               | Group 2 | 1 |
| BMA1702 | conserved hypothetical protein                                     | Group 2 | 1 |
| BMA1703 | ferredoxin, 2Fe-2S                                                 | Group 2 | 1 |
| BMA1708 | cysteine desulfurase                                               | Group 2 | 1 |
| BMA1714 | transcriptional regulator, IclR family                             | Group 2 | 1 |
| BMA1717 | D-alanyl-D-alanine endopeptidase, putative                         | Group 2 | 1 |



|         |                                                                                    |         |   |
|---------|------------------------------------------------------------------------------------|---------|---|
| BMA1721 | pyruvate dehydrogenase, E1 component                                               | Group 2 | 1 |
| BMA1723 | DNA-binding response regulator, LuxR family                                        | Group 2 | 1 |
| BMA1726 | oligopeptidase A                                                                   | Group 2 | 1 |
| BMA1736 | DNA-binding response regulator NarL                                                | Group 2 | 1 |
| BMA1743 | glutamine synthetase, type I                                                       | Group 2 | 1 |
| BMA1745 | molybdopterin-binding protein                                                      | Group 2 | 1 |
| BMA1749 | conserved hypothetical protein                                                     | Group 2 | 1 |
| BMA1752 | conserved hypothetical protein                                                     | Group 2 | 1 |
| BMA1767 | peptidyl-tRNA hydrolase, putative                                                  | Group 2 | 1 |
| BMA1777 | iron compound ABC transporter, periplasmic iron-compound-binding protein, putative | Group 2 | 1 |
| BMA1786 | conserved hypothetical protein                                                     | Group 2 | 1 |
| BMA1813 | conserved hypothetical protein                                                     | Group 2 | 1 |
| BMA1819 | NADH dehydrogenase I, K subunit                                                    | Group 2 | 1 |
| BMA1820 | NADH dehydrogenase I, J subunit                                                    | Group 2 | 1 |
| BMA1826 | NADH dehydrogenase I, D subunit                                                    | Group 2 | 1 |
| BMA1829 | NADH dehydrogenase I, A subunit                                                    | Group 2 | 1 |
| BMA1835 | ribosomal protein S15                                                              | Group 2 | 1 |
| BMA1847 | acetolactate synthase, small subunit                                               | Group 2 | 1 |
| BMA1857 | transcriptional regulator, TetR family                                             | Group 2 | 1 |
| BMA1883 | uracil phosphoribosyltransferase                                                   | Group 2 | 1 |
| BMA1912 | ABC transporter, permease/ATP-binding protein                                      | Group 2 | 1 |
| BMA1935 | cytochrome C4 family protein, authentic frameshift                                 | Group 2 | 1 |
| BMA1947 | heat shock protein HtpG                                                            | Group 2 | 1 |
| BMA1981 | O-antigen methyl transferase, putative                                             | Group 2 | 1 |
| BMA1984 | O-antigen acetylase, putative                                                      | Group 2 | 1 |
| BMA1985 | polysaccharide ABC transporter, ATP-binding protein                                | Group 2 | 1 |
| BMA1988 | dTDP-4-dehydrorhamnose 3,5-epimerase                                               | Group 2 | 1 |
| BMA1996 | conserved hypothetical protein TIGR00250                                           | Group 2 | 1 |
| BMA1999 | rubredoxin                                                                         | Group 2 | 1 |
| BMA2001 | chaperonin, 60 kDa                                                                 | Group 2 | 1 |
| BMA2002 | chaperonin, 10 kDa                                                                 | Group 2 | 1 |
| BMA2005 | transcriptional regulator family protein                                           | Group 2 | 1 |
| BMA2050 | D-lactate dehydrogenase                                                            | Group 2 | 1 |
| BMA2058 | conserved hypothetical protein                                                     | Group 2 | 1 |
| BMA2066 | antioxidant, AhpC/Tsa family                                                       | Group 2 | 1 |
| BMA2068 | conserved hypothetical protein                                                     | Group 2 | 1 |
| BMA2074 | conserved hypothetical protein TIGR00244                                           | Group 2 | 1 |
| BMA2075 | serine hydroxymethyltransferase                                                    | Group 2 | 1 |
| BMA2078 | tolQ protein                                                                       | Group 2 | 1 |
| BMA2082 | outer membrane protein, OmpA family                                                | Group 2 | 1 |
| BMA2083 | conserved hypothetical protein                                                     | Group 2 | 1 |
| BMA2089 | outer membrane porin, putative                                                     | Group 2 | 1 |
| BMA2095 | DNA-directed RNA polymerase, omega subunit                                         | Group 2 | 1 |
| BMA2097 | conserved hypothetical protein TIGR00255                                           | Group 2 | 1 |
| BMA2173 | protein-L-isoaspartate O-methyltransferase, putative                               | Group 2 | 1 |
| BMA2174 | rhodanese-like domain protein                                                      | Group 2 | 1 |
| BMA2181 | urease accessory protein UreD                                                      | Group 2 | 1 |
| BMA2229 | peptidyl-prolyl cis-trans isomerase, FKBP-type                                     | Group 2 | 1 |
| BMA2231 | ribosomal protein L28                                                              | Group 2 | 1 |
| BMA2232 | ribosomal protein L33                                                              | Group 2 | 1 |
| BMA2271 | superoxide dismutase                                                               | Group 2 | 1 |
| BMA2277 | adenylate kinase                                                                   | Group 2 | 1 |
| BMA2279 | cold-shock domain family protein                                                   | Group 2 | 1 |

|         |                                                                      |         |   |
|---------|----------------------------------------------------------------------|---------|---|
| BMA2280 | ATP-dependent Clp protease adaptor protein ClpS                      | Group 2 | 1 |
| BMA2281 | ATP-dependent Clp protease, ATP-binding subunit ClpA                 | Group 2 | 1 |
| BMA2321 | 2-amino-4-hydroxy-6-hydroxymethylidihydropteridine pyrophosphokinase | Group 2 | 1 |
| BMA2326 | chaperone protein DnaK                                               | Group 2 | 1 |
| BMA2331 | heat-inducible transcription repressor HrcA                          | Group 2 | 1 |
| BMA2341 | ribosomal protein L13                                                | Group 2 | 1 |
| BMA2343 | iron-sulfur cluster assembly accessory protein                       | Group 2 | 1 |
| BMA2380 | cytochrome b561, putative                                            | Group 2 | 1 |
| BMA2382 | YceI-like family protein                                             | Group 2 | 1 |
| BMA2417 | flavoheмоprotein                                                     | Group 2 | 1 |
| BMA2423 | conserved hypothetical protein                                       | Group 2 | 1 |
| BMA2440 | transcriptional regulator, LysR family                               | Group 2 | 1 |
| BMA2442 | adenylosuccinate lyase                                               | Group 2 | 1 |
| BMA2446 | 6-phosphogluconate dehydratase                                       | Group 2 | 1 |
| BMA2453 | leucyl-tRNA synthetase                                               | Group 2 | 1 |
| BMA2457 | outer membrane lipoprotein, putative                                 | Group 2 | 1 |
| BMA2469 | transketolase                                                        | Group 2 | 1 |
| BMA2471 | glyoxalase family protein                                            | Group 2 | 1 |
| BMA2474 | barstar family protein                                               | Group 2 | 1 |
| BMA2500 | 3-dehydroquinone dehydratase, type II                                | Group 2 | 1 |
| BMA2509 | ribonucleoside-diphosphate reductase, beta subunit                   | Group 2 | 1 |
| BMA2518 | pyrophosphatase, MutT/nudix family                                   | Group 2 | 1 |
| BMA2522 | ribosomal protein L27                                                | Group 2 | 1 |
| BMA2523 | ribosomal protein L21                                                | Group 2 | 1 |
| BMA2524 | octaprenyl-diphosphate synthase                                      | Group 2 | 1 |
| BMA2535 | conserved hypothetical protein                                       | Group 2 | 1 |
| BMA2536 | conserved hypothetical protein                                       | Group 2 | 1 |
| BMA2545 | cell division protein FtsZ                                           | Group 2 | 1 |
| BMA2550 | UDP-N-acetylmuramate--alanine ligase                                 | Group 2 | 1 |
| BMA2558 | cell division protein FtsL, putative                                 | Group 2 | 1 |
| BMA2587 | orotate phosphoribosyltransferase                                    | Group 2 | 1 |
| BMA2604 | ribosomal protein L17                                                | Group 2 | 1 |
| BMA2606 | dna-directed rna polymerase alpha chain                              | Group 2 | 1 |
| BMA2607 | ribosomal protein S4                                                 | Group 2 | 1 |
| BMA2609 | ribosomal protein S13                                                | Group 2 | 1 |
| BMA2610 | ribosomal protein L36                                                | Group 2 | 1 |
| BMA2611 | translation initiation factor IF-1                                   | Group 2 | 1 |
| BMA2612 | preprotein translocase, SecY subunit                                 | Group 2 | 1 |
| BMA2616 | ribosomal protein L18                                                | Group 2 | 1 |
| BMA2618 | ribosomal protein S8                                                 | Group 2 | 1 |
| BMA2619 | ribosomal protein S14                                                | Group 2 | 1 |
| BMA2620 | ribosomal protein L5                                                 | Group 2 | 1 |
| BMA2621 | ribosomal protein L24                                                | Group 2 | 1 |
| BMA2622 | ribosomal protein L14                                                | Group 2 | 1 |
| BMA2623 | ribosomal protein S17                                                | Group 2 | 1 |
| BMA2624 | ribosomal protein L29                                                | Group 2 | 1 |
| BMA2625 | ribosomal protein L16                                                | Group 2 | 1 |
| BMA2627 | ribosomal protein L22                                                | Group 2 | 1 |
| BMA2628 | ribosomal protein S19                                                | Group 2 | 1 |
| BMA2629 | ribosomal protein L2                                                 | Group 2 | 1 |
| BMA2630 | ribosomal protein L23                                                | Group 2 | 1 |
| BMA2632 | ribosomal protein L3                                                 | Group 2 | 1 |
| BMA2633 | ribosomal protein S10                                                | Group 2 | 1 |

|         |                                                                         |         |   |
|---------|-------------------------------------------------------------------------|---------|---|
| BMA2634 | translation elongation factor Tu                                        | Group 2 | 1 |
| BMA2635 | translation elongation factor G                                         | Group 2 | 1 |
| BMA2637 | ribosomal protein S12                                                   | Group 2 | 1 |
| BMA2640 | DNA-directed RNA polymerase, beta subunit                               | Group 2 | 1 |
| BMA2642 | ribosomal protein L7/L12                                                | Group 2 | 1 |
| BMA2643 | ribosomal protein L10                                                   | Group 2 | 1 |
| BMA2647 | preprotein translocase, SecE subunit                                    | Group 2 | 1 |
| BMA2649 | translation elongation factor Tu                                        | Group 2 | 1 |
| BMA2695 | stringent starvation protein A                                          | Group 2 | 1 |
| BMA2696 | ubiquinol-cytochrome c reductase, cytochrome c1                         | Group 2 | 1 |
| BMA2703 | twin-arginine translocation protein, TatA/E family                      | Group 2 | 1 |
| BMA2705 | membrane protein, putative                                              | Group 2 | 1 |
| BMA2706 | phosphoribosyl-ATP pyrophosphohydrolase                                 | Group 2 | 1 |
| BMA2707 | phosphoribosyl-AMP cyclohydrolase                                       | Group 2 | 1 |
| BMA2709 | phosphoribosylformimino-5-aminoimidazole carboxamide ribotide isomerase | Group 2 | 1 |
| BMA2712 | imidazoglycerol-phosphate dehydratase                                   | Group 2 | 1 |
| BMA2717 | BoIA/YrbA family protein                                                | Group 2 | 1 |
| BMA2722 | conserved hypothetical protein                                          | Group 2 | 1 |
| BMA2728 | thiamin biosynthesis ThiG                                               | Group 2 | 1 |
| BMA2754 | conserved hypothetical protein                                          | Group 2 | 1 |
| BMA2787 | ipgF protein, putative                                                  | Group 2 | 1 |
| BMA2791 | cold-shock domain family protein                                        | Group 2 | 1 |
| BMA2840 | 5,10-methylenetetrahydrofolate reductase                                | Group 2 | 1 |
| BMA2841 | membrane protein, putative                                              | Group 2 | 1 |
| BMA2842 | adenosylhomocysteinase                                                  | Group 2 | 1 |
| BMA2872 | ribosomal protein S21                                                   | Group 2 | 1 |
| BMA2905 | H-NS histone family protein                                             | Group 2 | 1 |
| BMA2913 | DNA-binding protein HU, form B                                          | Group 2 | 1 |
| BMA2917 | conserved hypothetical protein                                          | Group 2 | 1 |
| BMA2918 | transcriptional regulator, MarR family                                  | Group 2 | 1 |
| BMA2926 | pterin-4-alpha-carbinolamine dehydratase, putative                      | Group 2 | 1 |
| BMA2927 | phenylalanine-4-hydroxylase                                             | Group 2 | 1 |
| BMA2944 | glucose-inhibited division protein A                                    | Group 2 | 1 |
| BMA2946 | sporulation initiation inhibitor protein Soj                            | Group 2 | 1 |
| BMA2952 | ATP synthase F0, C subunit                                              | Group 2 | 1 |
| BMA2953 | ATP synthase F0, B subunit                                              | Group 2 | 1 |
| BMA2955 | ATP synthase F1, alpha subunit                                          | Group 2 | 1 |
| BMA2956 | ATP synthase F1, gamma subunit                                          | Group 2 | 1 |
| BMA2957 | ATP synthase F1, beta subunit                                           | Group 2 | 1 |
| BMA2958 | ATP synthase F1, epsilon subunit                                        | Group 2 | 1 |
| BMA2975 | transcriptional regulator, merR family                                  | Group 2 | 1 |
| BMA2994 | glycine cleavage system H protein                                       | Group 2 | 1 |
| BMA3090 | thiamine biosynthesis protein ThiC                                      | Group 2 | 1 |
| BMA3109 | ribosomal subunit interface protein                                     | Group 2 | 1 |
| BMA3113 | ATP-dependent protease La domain protein                                | Group 2 | 1 |
| BMA3120 | ribose-phosphate pyrophosphokinase                                      | Group 2 | 1 |
| BMA3124 | ferredoxin                                                              | Group 2 | 1 |
| BMA3125 | pantetheine-phosphate adenylyltransferase                               | Group 2 | 1 |
| BMA3138 | RNA polymerase sigma-32 factor                                          | Group 2 | 1 |
| BMA3178 | cytochrome d ubiquinol oxidase, subunit I                               | Group 2 | 1 |
| BMA3195 | cytochrome c oxidase assembly protein ctaG, putative                    | Group 2 | 1 |
| BMA3205 | protein-export protein SecB                                             | Group 2 | 1 |
| BMA3207 | rhodanese-like domain protein                                           | Group 2 | 1 |

|          |                                                                              |         |   |
|----------|------------------------------------------------------------------------------|---------|---|
| BMA3210  | HesA/MoeB/ThiF family protein                                                | Group 2 | 1 |
| BMA3211  | phosphoenolpyruvate-protein phosphotransferase                               | Group 2 | 1 |
| BMA3212  | phosphocarrier protein HPr                                                   | Group 2 | 1 |
| BMA3213  | PTS system, fructose-specific IIA component                                  | Group 2 | 1 |
| BMA3219  | conserved hypothetical protein                                               | Group 2 | 1 |
| BMA3251  | sensor histidine kinase                                                      | Group 2 | 1 |
| BMA3252  | response regulator                                                           | Group 2 | 1 |
| BMA3255  | DnaK suppressor protein                                                      | Group 2 | 1 |
| BMA3263  | hypothetical protein                                                         | Group 2 | 1 |
| BMA3292  | ferredoxin--NADP reductase                                                   | Group 2 | 1 |
| BMA3333  | flagellar protein FlgJ                                                       | Group 2 | 1 |
| BMA3341  | hypothetical protein                                                         | Group 2 | 1 |
| BMA3342  | alkylphosphonate utilization operon protein PhnA, putative                   | Group 2 | 1 |
| BMA3370  | LemA family protein                                                          | Group 2 | 1 |
| BMA3379  | glucosamine--fructose-6-phosphate aminotransferase, isomerizing              | Group 2 | 1 |
| BMA3381  | conserved hypothetical protein                                               | Group 2 | 1 |
| BMA3396  | hypothetical protein                                                         | Group 2 | 1 |
| BMA3400  | ribosomal protein L34                                                        | Group 2 | 1 |
| BMAA0002 | phage integrase family protein                                               | Group 2 | 1 |
| BMAA0017 | D-beta-hydroxybutyrate dehydrogenase                                         | Group 2 | 1 |
| BMAA0018 | acetoacetate decarboxylase                                                   | Group 2 | 1 |
| BMAA0024 | hypothetical protein                                                         | Group 2 | 1 |
| BMAA0031 | transcriptional regulator, Crp/Fnr family                                    | Group 2 | 1 |
| BMAA0040 | hypothetical protein                                                         | Group 2 | 1 |
| BMAA0195 | ubiquinol oxidase, subunit I                                                 | Group 2 | 1 |
| BMAA0256 | conserved hypothetical protein                                               | Group 2 | 1 |
| BMAA0292 | tautomerase enzyme family protein                                            | Group 2 | 1 |
| BMAA0302 | hypothetical protein                                                         | Group 2 | 1 |
| BMAA0303 | organic hydroperoxide resistance protein                                     | Group 2 | 1 |
| BMAA0309 | AMP nucleosidase                                                             | Group 2 | 1 |
| BMAA0318 | decarboxylase family protein                                                 | Group 2 | 1 |
| BMAA0329 | geranyltranstransferase                                                      | Group 2 | 1 |
| BMAA0339 | RNA polymerase sigma factor RpoD                                             | Group 2 | 1 |
| BMAA0365 | H-NS histone family protein                                                  | Group 2 | 1 |
| BMAA0416 | hypothetical protein                                                         | Group 2 | 1 |
| BMAA0422 | conserved hypothetical protein                                               | Group 2 | 1 |
| BMAA0424 | membrane protein, putative                                                   | Group 2 | 1 |
| BMAA0445 | Rhs element Vgr protein                                                      | Group 2 | 1 |
| BMAA0505 | glutamyl-tRNA reductase                                                      | Group 2 | 1 |
| BMAA0519 | GTP-binding protein YchF                                                     | Group 2 | 1 |
| BMAA0525 | thiol:disulfide interchange protein DsbC, putative                           | Group 2 | 1 |
| BMAA0660 | amino acid ABC transporter, periplasmic amino acid-binding protein, putative | Group 2 | 1 |
| BMAA0699 | hypothetical protein                                                         | Group 2 | 1 |
| BMAA0719 | DNA-binding protein                                                          | Group 2 | 1 |
| BMAA0773 | transcriptional regulator, TetR family, putative                             | Group 2 | 1 |
| BMAA0802 | isovaleryl-CoA dehydrogenase                                                 | Group 2 | 1 |
| BMAA0875 | oxidoreductase, aldo/keto reductase family                                   | Group 2 | 1 |
| BMAA0883 | iron permease, FTR1 family                                                   | Group 2 | 1 |
| BMAA0896 | ribosomal protein S21                                                        | Group 2 | 1 |
| BMAA0899 | cold-shock domain family protein                                             | Group 2 | 1 |
| BMAA0937 | transcriptional regulator, ArsR family                                       | Group 2 | 1 |
| BMAA0943 | conserved hypothetical protein                                               | Group 2 | 1 |
| BMAA0996 | gamma-glutamyltranspeptidase                                                 | Group 2 | 1 |

|          |                                                                           |         |   |
|----------|---------------------------------------------------------------------------|---------|---|
| BMAA0998 | hypothetical protein                                                      | Group 2 | 1 |
| BMAA1046 | RND efflux system, outer membrane lipoprotein, NodT family                | Group 2 | 1 |
| BMAA1141 | homoprotocatechuate degradative operon repressor                          | Group 2 | 1 |
| BMAA1232 | hypothetical protein                                                      | Group 2 | 1 |
| BMAA1261 | bacterial extracellular solute-binding protein, family 5                  | Group 2 | 1 |
| BMAA1286 | outer membrane porin, putative                                            | Group 2 | 1 |
| BMAA1350 | CBS domain protein                                                        | Group 2 | 1 |
| BMAA1353 | outer membrane porin OpcP                                                 | Group 2 | 1 |
| BMAA1370 | oxidoreductase, aldo/keto reductase family                                | Group 2 | 1 |
| BMAA1462 | transcriptional regulator, GntR family                                    | Group 2 | 1 |
| BMAA1496 | amino acid ABC transporter, periplasmic amino acid-binding protein        | Group 2 | 1 |
| BMAA1723 | tRNA pseudouridine synthase A                                             | Group 2 | 1 |
| BMAA1744 | citrate synthase I                                                        | Group 2 | 1 |
| BMAA1745 | conserved hypothetical protein                                            | Group 2 | 1 |
| BMAA1749 | succinate dehydrogenase, cytochrome b556 subunit                          | Group 2 | 1 |
| BMAA1781 | conserved hypothetical protein                                            | Group 2 | 1 |
| BMAA1794 | acetyl-coenzyme A synthetase                                              | Group 2 | 1 |
| BMAA1797 | hydro-lyase, Fe-S type, tartrate/fumarate family                          | Group 2 | 1 |
| BMAA1798 | bacterioferritin                                                          | Group 2 | 1 |
| BMAA1963 | radical SAM domain protein                                                | Group 2 | 1 |
| BMAA2035 | stress response protein                                                   | Group 2 | 1 |
| BMAA2098 | glutamine ABC transporter, periplasmic glutamine-binding protein          | Group 2 | 1 |
| BMAA2110 | NADPH-dependent FMN reductase domain protein                              | Group 2 | 1 |
| BMAA2111 | sigma-70 factor, putative                                                 | Group 2 | 1 |
| BMAA2113 | arsenate reductase                                                        | Group 2 | 1 |
| BMA0256  | conserved hypothetical protein                                            | Group 2 | 2 |
| BMA0376  | conserved hypothetical protein                                            | Group 2 | 2 |
| BMA1120  | histidinol-phosphate aminotransferase, putative, authentic point mutation | Group 2 | 2 |
| BMA1818  | NADH dehydrogenase I, L subunit                                           | Group 2 | 2 |
| BMA2202  | translation initiation factor IF-1                                        | Group 2 | 2 |
| BMA2298  | capsular polysaccharide biosynthesis protein, putative                    | Group 2 | 2 |
| BMA2302  | capsular polysaccharide biosynthesis protein, putative                    | Group 2 | 2 |
| BMA2303  | glycosyl transferase, group 1 family protein                              | Group 2 | 2 |
| BMA2306  | capsular polysaccharide export inner-membrane protein                     | Group 2 | 2 |
| BMA2544  | AhpC/TSA family protein                                                   | Group 2 | 2 |
| BMA2689  | conserved hypothetical protein                                            | Group 2 | 2 |
| BMA2690  | conserved hypothetical protein                                            | Group 2 | 2 |
| BMA2884  | hypothetical protein                                                      | Group 2 | 2 |
| BMA3088  | conserved hypothetical protein                                            | Group 2 | 2 |
| BMAA0064 | conserved hypothetical protein                                            | Group 2 | 2 |
| BMAA0162 | hypothetical protein                                                      | Group 2 | 2 |
| BMAA0234 | hypothetical protein                                                      | Group 2 | 2 |
| BMAA0237 | hypothetical protein                                                      | Group 2 | 2 |
| BMAA0238 | hypothetical protein                                                      | Group 2 | 2 |
| BMAA0361 | hypothetical protein                                                      | Group 2 | 2 |
| BMAA0537 | hypothetical protein                                                      | Group 2 | 2 |
| BMAA0548 | hypothetical protein                                                      | Group 2 | 2 |
| BMAA0727 | GTP cyclohydrolase I                                                      | Group 2 | 2 |
| BMAA0853 | hypothetical protein                                                      | Group 2 | 2 |
| BMAA0866 | hypothetical protein                                                      | Group 2 | 2 |
| BMAA0873 | hypothetical protein                                                      | Group 2 | 2 |
| BMAA1092 | GTP cyclohydrolase I                                                      | Group 2 | 2 |
| BMAA1315 | hypothetical protein                                                      | Group 2 | 2 |

|          |                                                                        |         |   |
|----------|------------------------------------------------------------------------|---------|---|
| BMAA1318 | hypothetical protein                                                   | Group 2 | 2 |
| BMAA1490 | beta-ketoadipyl CoA thiolase                                           | Group 2 | 2 |
| BMAA1507 | hypothetical protein                                                   | Group 2 | 2 |
| BMAA1514 | hypothetical protein                                                   | Group 2 | 2 |
| BMAA1515 | hypothetical protein                                                   | Group 2 | 2 |
| BMAA1546 | hypothetical protein                                                   | Group 2 | 2 |
| BMAA1555 | hypothetical protein                                                   | Group 2 | 2 |
| BMAA1575 | hypothetical protein                                                   | Group 2 | 2 |
| BMAA1646 | peptide synthetase, putative                                           | Group 2 | 2 |
| BMAA1805 | hypothetical protein                                                   | Group 2 | 2 |
| BMAA1984 | sigma-54 dependent transcriptional regulator, authentic point mutation | Group 2 | 2 |
| BMA0497  | site-specific recombinase, phage integrase family, truncation          | Group 2 | 3 |
| BMA0792  | hypothetical protein                                                   | Group 2 | 3 |
| BMA1021  | type-1 fimbrial protein, authentic frameshift                          | Group 2 | 3 |
| BMA1037  | hypothetical protein                                                   | Group 2 | 3 |
| BMA1117  | transposase, IS3 family, truncation                                    | Group 2 | 3 |
| BMA1649  | hypothetical protein                                                   | Group 2 | 3 |
| BMA1673  | peptidyl-prolyl cis-trans isomerase, FKBP-type, authentic frameshift   | Group 2 | 3 |
| BMA1787  | transcriptional regulator, putative                                    | Group 2 | 3 |
| BMA1843  | 2-isopropylmalate synthase, authentic frameshift                       | Group 2 | 3 |
| BMA3005  | site-specific recombinase, phage integrase family                      | Group 2 | 3 |
| BMA3009  | lipoprotein, putative                                                  | Group 2 | 3 |
| BMAA0038 | hypothetical protein                                                   | Group 2 | 3 |
| BMAA0081 | conserved domain protein                                               | Group 2 | 3 |
| BMAA0871 | hypothetical protein                                                   | Group 2 | 3 |
| BMAA1189 | transcriptional regulator, AraC family                                 | Group 2 | 3 |
| BMAA1592 | hipB domain protein                                                    | Group 2 | 3 |
| BMAA1790 | conserved hypothetical protein, truncation                             | Group 2 | 3 |
| BMAA1838 | conserved hypothetical protein                                         | Group 2 | 3 |

---
