# Supplementary material for: Bacterial genome adaptation to niches: Divergence of the potential virulence genes in three Burkholderia species of different survival strategies
Source: PubMed Central journal article supplement (PMC1343551; doi:10.1186/1471-2164-6-174), 2005-12-07
Supplement: 1471-2164-6-174-S6.pdf [file 1471-2164-6-174-S6.pdf]

**Sup\_Table\_4. The 30 in vivo-expressed genes that are degenerated or unique to Bm in Fig. 3B.**

| Gene     | Description                                                                              | location       | non-SSR        | SSR                                           | Truncation  | Point mutation | in frame | Frame shift                   |
|----------|------------------------------------------------------------------------------------------|----------------|----------------|-----------------------------------------------|-------------|----------------|----------|-------------------------------|
| BMA0017  | hypothetical protein                                                                     | 5'-end         | G insertion    |                                               |             |                |          | Yes                           |
| BMA0267  | conserved domain protein, truncation                                                     | 3'-end         |                |                                               | Yes         |                |          | Yes                           |
| BMA0605  | conserved hypothetical protein ( <i>Ralstonia solanacearum</i> hemerythrin-like protein) | 5'-end         |                | (ACCCGAGCTGAA) <sub>2</sub> insertion         |             |                | Yes      |                               |
| BMA0642  | conserved hypothetical protein, degenerate                                               | 5'-end         | A deletion     |                                               |             |                |          | Yes                           |
| BMA1561  | hypothetical protein                                                                     | middle         |                | GC                                            |             |                |          | Yes                           |
| BMA0702  | hypothetical protein                                                                     | 5'-end, middle |                | 5 different kinds                             |             |                |          | Yes                           |
| BMA2007  | hypothetical protein                                                                     | 5'-end         | 54 bp deletion |                                               |             |                |          | Yes                           |
| BMA3012  | hypothetical protein                                                                     | 5'-end         | C insertion    | GGAGACGCATC deletion                          |             |                |          | Yes                           |
| BMA3300  | hypothetical protein                                                                     | middle         |                | GCCGAC                                        |             |                | Yes      |                               |
| BMAA0323 | hypothetical protein                                                                     | middle, 3'-end |                |                                               |             | 3              | Yes      |                               |
| BMAA0326 | hypothetical protein                                                                     | middle         |                |                                               |             | 1              | Yes      |                               |
| BMAA0386 | D-serine dehydratase, authentic frameshift                                               | middle         | A deletion     |                                               |             | 1              |          | Yes                           |
| BMAA0562 | hypothetical protein                                                                     | 5'-end         |                | CGCACCG insertion                             |             |                |          | Yes                           |
| BMAA0597 | hypothetical protein                                                                     | middle         | G insertion    | (CGCCGTATGT) <sub>2</sub> deletion            |             |                |          | Yes                           |
| BMAA0610 | di-haem cytochrome c peroxidase family protein                                           |                |                |                                               | entire gene |                |          |                               |
| BMAA0775 | hypothetical protein                                                                     | middle, 3'-end |                | GCGCTCGCCCCGAC deletion, GGCGCC deletion      |             |                |          | Yes- but only between the two |
| BMAA0825 | hypothetical protein                                                                     | middle         |                | GC deletion                                   |             |                |          | Yes                           |
| BMAA0838 | hypothetical protein                                                                     | middle         |                | CGGCG deletion                                |             |                |          | Yes                           |
| BMAA0895 | hypothetical protein                                                                     | middle         |                | C deletion in (C) <sub>4</sub>                |             |                |          | Yes                           |
| BMAA0985 | hypothetical protein                                                                     | 5', 3', middle |                | many of them                                  |             |                |          | Yes                           |
| BMAA1109 | hypothetical protein                                                                     | middle         |                | C deletion in (C) <sub>7</sub>                |             |                |          | Yes                           |
| BMAA1116 | conserved hypothetical protein                                                           | middle, 3'-end |                | (GCGCCT) <sub>10</sub> deletion, CGG deletion |             |                | Yes      |                               |
| BMAA1354 | hypothetical protein                                                                     | 3'-end         |                | A inserion in (A) <sub>2</sub>                |             |                |          | Yes                           |
| BMAA1383 | hypothetical protein                                                                     | 3'-end         |                | C inserion to make (C) <sub>2</sub>           |             |                |          | Yes                           |
| BMAA1475 | porin, degenerate                                                                        | 3'-end         | A insertion    |                                               |             |                |          | Yes                           |
| BMAA1526 | BapA protein                                                                             | middle         |                | (CATCAGGCGTCA) <sub>2</sub> insertion         |             |                | Yes      |                               |
| BMAA1625 | type III secretion inner membrane protein, authentic frameshift                          | middle         |                | GCGGC deletion                                |             |                |          | Yes                           |
| BMAA1887 | hypothetical protein                                                                     | 5'-end         |                | GTCCTCGAT deletion                            |             |                | Yes      |                               |
| BMAA1935 | hypothetical protein                                                                     | 5'-end         |                | (CGGCTT) <sub>4</sub> insertion               |             |                | Yes      |                               |
| BMAA1945 | hypothetical protein                                                                     | 5'-end, middle |                | many of them                                  |             |                |          | Yes                           |
